# Supplementary material
Source: PubMed Central journal article supplement (PMC4021567)

# A Catalytic Enantiotopic-Group-Selective Suzuki Reaction for the Construction of Chiral Organoboronates

Chunrui Sun, Bowman Potter and James P. Morken\*

*Department of Chemistry, Merkert Chemistry Center, Boston College, Chestnut Hill,  
Massachusetts 02467*

## Table of Contents

|                                                                                     | Page |
|-------------------------------------------------------------------------------------|------|
| I. General Information                                                              | 2    |
| II. Ligand Synthesis                                                                | 3    |
| III. Representative Procedure for Preparation of 1,1-diborylalkanes                 | 6    |
| IV. Characterization of 1,1-Diborylalkanes                                          | 7    |
| V. Procedures for Enantiotopic-Group-Selective Suzuki-Miyaura Coupling              | 11   |
| VI. Characterization of Reaction Products and Analysis of Stereochemistry           | 12   |
| VII. Preparation of Compound ( <i>S</i> )- <sup>10</sup> B- <b>26</b>               | 45   |
| VIII. Cross-coupling of ( <i>S</i> )- <sup>10</sup> B- <b>26</b> (Equation 2 and 3) | 50   |
| IX. Cross-over Experiment (Equation 4)                                              | 55   |
| X. <sup>1</sup> H NMR and <sup>13</sup> C NMR Spectra                               | 63   |

## ***I. General Information***

<sup>1</sup>H NMR spectra were recorded on either a Varian Gemini-500 (500 MHz), or a Varian Inova-500 (500 MHz) spectrometer. Chemical shifts are reported in ppm with the solvent resonance as the internal standard (CDCl<sub>3</sub>: 7.26 ppm). Data are reported as follows: chemical shift, integration, multiplicity (s = singlet, d = doublet, t = triplet, q = quartet, br = broad, m = multiplet), and coupling constants (Hz). <sup>13</sup>C NMR spectra were recorded on either a Varian Gemini-500 (125 MHz), or a Varian Inova-500 (125 MHz) spectrometer with complete proton decoupling. Chemical shifts are reported in ppm with the solvent resonance as the internal standard (CDCl<sub>3</sub>: 77.0 ppm). <sup>31</sup>P NMR spectra were recorded on a Varian Gemini-500 (202 MHz) spectrometer. <sup>11</sup>B NMR spectra were recorded on a Varian Gemini-500 (128 MHz) spectrometer. Infrared (IR) spectra were recorded on a Bruker alpha-P Spectrometer. Frequencies are reported in wavenumbers (cm<sup>-1</sup>) as follows: strong (s), broad (br), medium (m), and weak (w). High-resolution mass spectrometry (ESI+) was performed at the Mass Spectrometry Facility, Boston College, Chestnut Hill, MA.

Liquid chromatography was performed using forced flow (flash chromatography) on silica gel (SiO<sub>2</sub>, 230 x 450 Mesh) purchased from Silicycle. Thin layer chromatography (TLC) was performed on 25 μm silica gel glass backed plates from Silicycle. Visualization was performed using ultraviolet light (254 nm) and ceric ammonium molybdate (CAM) in ethanol.

Analytical chiral supercritical fluid chromatography (SFC) was performed on a TharSFC Method Station II equipped with Waters 2998 Photodiode Array Detector. Optical rotations were measured on a ATAGO AP-300 Polarimeter.

All reactions were conducted in oven- or flame-dried glassware under an inert atmosphere of nitrogen or argon. Tetrahydrofuran (THF), diethyl ether (Et<sub>2</sub>O), dichloromethane (DCM) and toluene were purified using Pure Solv MD-4 solvent purification system, from Innovative Technology, Inc., by passing the solvent through two activated alumina columns after purging with argon. Bis(pinacolato)diboron was generously donated by Allychem Co., Ltd. and used without further purification Phosphorous trichloride and palladium acetate were purchased from Strem Chemicals, Inc. and used without further purification. Triethylamine was purchased from Alfa Aesar and distilled over calcium hydride prior to use. All other reagents were purchased from either Aldrich, Alfa Aesar or Acros and used without further purification.

## II. Ligand Synthesis and Characterization

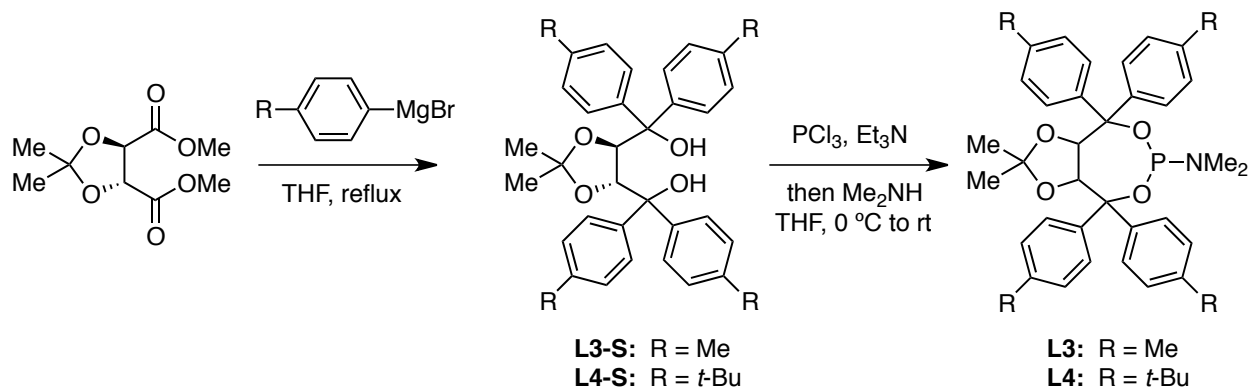

**Procedure for preparation of L3-S and L4-S.** Dimethyl ketal *para*-methylphenyl-TADDOL was prepared according to the literature procedure<sup>1</sup> with slight modification. To a flame dried 250 mL 2-neck round-bottom flask equipped with a magnetic stir bar and reflux condenser was added freshly crushed magnesium turnings (4.37 g, 179.9 mmol) under N<sub>2</sub>. The apparatus was flame-dried, and a single crystal of I<sub>2</sub> was added as a solution in THF (180 mL). 4-Bromotoluene (30.76 g, 179.9 mmol) was slowly added to the magnesium mixture at room temperature *via* syringe. The reaction was cautiously allowed to reflux at 80 °C in an oil bath for 2 h, at which time the reaction was cooled to 0 °C, and a solution of (4*R*,5*R*)-dimethyl 2,2-dimethyl-1,3-dioxolane-4,5-dicarboxylate (8.53 g, 39.10 mmol) in tetrahydrofuran (20 mL) was added slowly *via* syringe. The reaction was allowed to reflux for 12 h, after which it was cooled to 0 °C and quenched with sat. NH<sub>4</sub>Cl<sub>(aq)</sub> (100 mL). The organic and aqueous layers were separated and the aqueous layer was extracted with ethyl acetate (3 x 50 mL). The combined organics were dried over Na<sub>2</sub>SO<sub>4(s)</sub>, filtered, and concentrated *in vacuo*. The crude material was recrystallized from hot methanol. The crystallized solid was isolated by filtration, washed with cold methanol, and dried under vacuum to afford the product as a white solid (17.0 g, 83% yield).

(1) Sieber, J. D.; Morken, J. P. *J. Am. Chem. Soc.* **2008**, *130*, 4978.

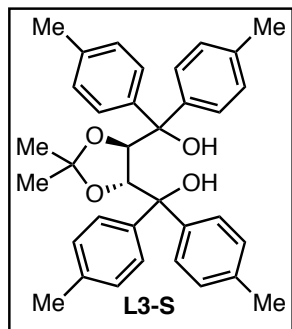

**((4R,5R)-2,2-dimethyl-1,3-dioxolane-4,5-diyl)bis(bis(4-methylphenyl)methanol) (L3-S).**  $^1\text{H}$  NMR (500 MHz,  $\text{CDCl}_3$ ):  $\delta$  7.42 (d,  $J = 8.2$  Hz, 4H), 7.24 (d,  $J = 8.2$  Hz, 4H), 7.15 (d,  $J = 8.0$  Hz, 4H), 7.07 (d,  $J = 8.1$  Hz, 4H), 4.59 (s, 2H), 3.97 (s, 2H), 2.39 (s, 6H), 2.31 (s, 6H), 1.09 (s, 6H).  $^{13}\text{C}$  NMR (125 MHz,  $\text{CDCl}_3$ ):  $\delta$  143.20, 139.99, 137.04, 136.59, 128.72, 128.44, 127.97, 127.50, 109.31, 81.03, 77.88, 27.26, 21.11, 21.05. IR (neat)  $\nu_{\text{max}}$  3326 (br), 3026 (w), 2983 (w), 2918

(w), 2881 (w), 1509 (m), 1449 (m), 1406 (w), 1376 (m), 1263 (m), 1240 (m), 1216 (m), 1167 (s), 1037 (s), 1019 (s), 885 (s), 813 (s), 750 (s), 611 (m), 563 (m)  $\text{cm}^{-1}$ . HRMS (ESI+) for  $\text{C}_{41}\text{H}_{47}\text{O}_2$   $[\text{M}+\text{H}-2\text{H}_2\text{O}]$ : calculated: 545.2662, found: 545.2673;  $[\alpha]_{\text{D}}^{20}$ : -42.27 ( $c = 1.00$ ,  $\text{CHCl}_3$ ,  $l = 50$  mm). Melting point: 101-104  $^\circ\text{C}$ .

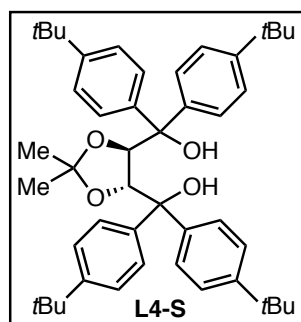

**((4R,5R)-2,2-dimethyl-1,3-dioxolane-4,5-diyl)bis(bis(4-*tert*-butylphenyl)methanol) (L4-S).** The reaction was performed *as shown above* with *para-t*-butyl bromobenzene. The crude reaction mixture was purified by recrystallization from methanol to afford a white solid (2.95 g, 85% yield).  $R_f = 0.3$  in 90:10 hexanes/ethyl acetate on TLC.  $^1\text{H}$  NMR (500 MHz,  $\text{CDCl}_3$ ):  $\delta$  7.45-7.43 (m, 4H), 7.33-7.31 (m, 4H), 7.29 (s, 8H), 4.56 (s, 2H), 3.89 (s, 2H), 1.33 (s, 18H), 1.27 (d,  $J = 2.1$  Hz, 18H), 1.01 (s, 6H).  $^{13}\text{C}$  NMR (125 MHz,  $\text{CDCl}_3$ ):  $\delta$  149.99, 149.76, 143.32, 139.67, 128.22, 127.29, 124.92, 124.04, 109.27, 81.15, 77.77, 34.46, 34.42, 31.46, 31.32, 27.04. IR (neat)  $\nu_{\text{max}}$  3292 (br), 2961 (s), 2903 (w), 2867 (w), 1510 (m), 1460 (m), 1403 (m), 1377 (m), 1268 (m), 1263 (m), 1241 (w), 1169 (w), 1052 (s), 1015 (s), 888 (m), 838 (s), 777 (w), 707 (m), 676 (m), 582 (m)  $\text{cm}^{-1}$ . HRMS (ESI+) for  $\text{C}_{47}\text{H}_{62}\text{O}_4\text{Na}$   $[\text{M}+\text{Na}]^+$ : calculated: 713.4540, found: 713.4557;

$[\alpha]_{\text{D}}^{20}$ : -56.07 ( $c = 1.00$ ,  $\text{CHCl}_3$ ,  $l = 50$  mm). Melting point: 211-213  $^\circ\text{C}$ .

**Procedure for preparation of L3 and L4.** To a flame-dried 150 mL round-bottom flask equipped with a magnetic star bar was added TADDOL derivative **L3-S** (2.61 g, 5.0 mmol) and THF (50 mL, 0.1 M) under N<sub>2</sub>. Triethylamine (2.37 mL, 17.0 mmol) was added *via* syringe and the reaction mixture was cooled to 0 °C in an ice bath. Phosphorous trichloride (523 μL, 6.0 mmol) was added dropwise *via* syringe at 0 °C and the reaction was brought to room temperature and allowed to stir for 2 h. Then the reaction was cooled back to 0 °C and dimethylamine (25.0 mL, 2.0 M in THF solution, 50.0 mmol) was added *via* syringe. The reaction was allowed to warm to room temperature and stir overnight. The reaction was diluted with Et<sub>2</sub>O, filtered through Celite and concentrated *in vacuo*. The crude material was purified by rapid silica gel chromatography (hexanes: ethyl acetate = 20:1), or by recrystallization from hot acetonitrile, to afford the title compound as a white solid (2.65 g, 89% yield).

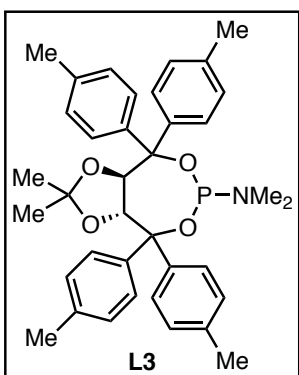

**(3aR,8aR)-N,N,2,2-tetramethyl-4,4,8,8-tetra-*p*-tolyltetrahydro[1,3]dioxolo[4,5-*e*][1,3,2]dioxaphosphin-6-amine (L3).** <sup>1</sup>H NMR (500 MHz, CDCl<sub>3</sub>) δ 7.66 (d, *J* = 8.2 Hz, 2H), 7.50 (d, *J* = 8.1 Hz, 2H), 7.38 (d, *J* = 8.1 Hz, 2H), 7.33 (d, *J* = 8.1 Hz, 2H), 7.14-7.11 (m, 6H), 7.08 (d, *J* = 8.2 Hz, 2H), 5.16 (dd, *J* = 8.5, 3.1 Hz, 1H), 4.81 (d, *J* = 8.4 Hz, 1H), 2.77 (s, 3H), 2.76 (d, *J* = 10.7 Hz, 4H), 2.34 (s, 3H), 2.34 (s, 3H), 2.33 (s, 3H), 2.31 (s, 3H), 1.34 (s, 3H), 0.34 (s, 3H). <sup>13</sup>C

NMR (125 MHz, CDCl<sub>3</sub>) δ 144.44, 144.03, 139.37, 139.31, 136.94, 136.78, 136.59, 129.01, 128.88, 128.70, 128.49, 128.32, 127.90, 127.12, 127.05, 111.59, 82.89, 82.86, 82.73, 82.58, 81.67, 81.16, 81.10, 35.52, 35.37, 27.73, 25.54, 21.25, 21.19, 21.17, 21.11. <sup>31</sup>P NMR (202 MHz, CDCl<sub>3</sub>) δ 139.59. IR (neat) ν<sub>max</sub> 2993 (w), 2921 (w), 2894 (w), 1509 (m), 1448 (m), 1371 (m), 1296 (m), 1198 (m), 1161 (m), 1095 (m), 1033 (m), 976 (s), 876 (s), 811 (s), 783 (s), 756 (s), 705 (s), 614 (m), 496 (m) cm<sup>-1</sup>. HRMS (ESI) calc. for C<sub>37</sub>H<sub>42</sub>NO<sub>4</sub>NaP [M+Na]<sup>+</sup> 618.2744, found 618.2750. [α]<sub>D</sub><sup>20</sup>: -131.46 (c = 1.00, CHCl<sub>3</sub>, *l* = 50 mm). Melting point: 200-202 °C.

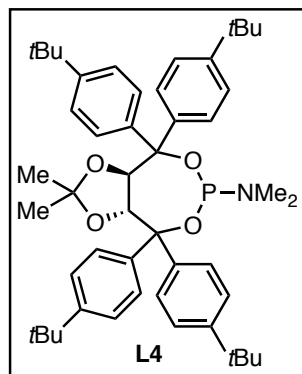

**(3aR,8aR)-4,4,8,8-tetrakis(4-(tert-butyl)phenyl)-N,N,2,2-tetramethyltetrahydro-[1,3]dioxolo[4,5-e][1,3,2]dioxaphosphepin-6-amine (L4).** The reaction was performed *as shown above*. The crude reaction mixture was purified by rapid silica gel chromatography (96:4 hexanes/ethyl acetate) to afford a white solid (1.38 g, 90% yield).  $R_f = 0.2$  in 98:2 hexanes/ethyl acetate on TLC.  $^1\text{H NMR}$  (500 MHz,  $\text{CDCl}_3$ )

$\delta$  7.71 (d,  $J = 8.6$  Hz, 2H), 7.55 (d,  $J = 8.5$  Hz, 2H), 7.39-7.26 (m, 12H), 5.18 (dd,  $J = 8.5, 3.1$  Hz, 1H), 4.78 (d,  $J = 8.5$  Hz, 1H), 2.79 (s, 3H), 2.77 (s, 3H), 1.36 (s, 3H), 1.32 (s, 9H), 1.32 (s, 9H), 1.31 (s, 9H), 1.27 (s, 9H), 0.22 (s, 3H).  $^{13}\text{C NMR}$  (125 MHz,  $\text{CDCl}_3$ )  $\delta$  149.94, 149.91, 149.79, 149.45, 144.01, 143.90, 139.29, 139.23, 128.83, 128.29, 128.27, 126.83, 126.04, 125.04, 124.61, 124.56, 124.04, 111.47, 83.25, 83.23, 82.80, 82.67, 81.27, 81.23, 35.62, 35.49, 34.55, 34.52, 34.47, 31.51, 31.46, 27.76, 25.08.  $^{31}\text{P NMR}$  (202 MHz,  $\text{CDCl}_3$ )  $\delta$  138.89. IR (neat)  $\nu_{\text{max}}$  2960 (m), 2903 (w), 2867 (w), 1509 (m), 1459 (w), 1363 (m), 1251 (m), 1212 (m), 1165 (m), 1089 (s), 1054 (s), 962 (s), 881 (s), 840 (s), 777 (s), 708 (s), 582 (w)  $\text{cm}^{-1}$ . HRMS (ESI) calc. for  $\text{C}_{49}\text{H}_{66}\text{NO}_4\text{NaP}$   $[\text{M}+\text{Na}]^+$  786.4622, found 786.4634.  $[\alpha]_{\text{D}}^{20} = -97.34$  ( $c = 1.00$ ,  $\text{CHCl}_3$ ,  $l = 50$  mm). Melting point: 177-180  $^\circ\text{C}$ .

### III. Representative Procedure for Preparation of 1,1-Diborylalkanes

**Method A.**<sup>2</sup> In the glove box, an oven-dried 2-dram vial with magnetic stir bar was charged with CuI (9.6 mg, 0.05 mmol),  $\text{B}_2(\text{pin})_2$  (266.8 mg, 0.10 mmol),  $\text{PPh}_3$  (17.2 mg, 0.065 mmol) and LiOMe (57.0 mg, 1.5 mmol). The vial was sealed with a polypropylene open-top cap with PTFE/silicone septum, and removed from the glove box. A solution of 1,1-dibromoalkane (prepared according to the literature procedure<sup>3</sup>) (0.50 mmol) in DMF (1.0 mL) was added *via* syringe. The reaction was allowed to stir at room temperature for 24 hours. Upon completion, the reaction mixture was diluted with diethyl ether (3 mL) and filtered through a short plug of Celite. The filtrate was washed with water (3 mL), dried over  $\text{MgSO}_4(\text{s})$  and concentrated *in vacuo*. The crude mixture was purified on silica gel (hexanes/ethyl acetate, stain in CAM) to give the desired product.

(2) Ito, H.; Kubota, K. *Org. Lett.* **2012**, *14*, 890

(3) Zhou, Q.; Chen, X.; Ma, D. *Angew. Chem., Int. Eng.* **2010**, *49*, 3513.

**Method B.**<sup>4</sup> In the glove box, an oven-dried 25-mL round bottom flask with magnetic stir bar was charged with lithium 2,2,6,6-tetramethylpiperidide (328.2 mg, 2.2 mmol). The flask was sealed with a rubber septum, removed from the glove box. THF (5 mL) was added and the reaction was cooled to 0 °C in an ice/water bath. A solution of bis(4,4,5,5-tetramethyl-1,3,2-dioxaborolan-2-yl)methane (536.0 mg, 2.0 mmol) in THF (3 mL) was added *via* syringe and the mixture was allowed to stir at 0 °C for 5 minutes. Then a solution of the corresponding alkyl bromide (2.2 mmol) in THF (2 mL) was added and the reaction mixture was allowed to warm to room temperature and stirred for 2 hours. Upon completion, the reaction mixture was cooled to 0 °C and quenched by the addition of sat. NH<sub>4</sub>Cl<sub>(aq)</sub> (0.5 mL). The resulting solution was dried over MgSO<sub>4(s)</sub>, filtered and concentrated *in vacuo*. The crude mixture was purified on silica gel (hexanes/ethyl acetate, stain in CAM) to give the desired product.

#### IV. Characterization of 1,1-Diborylalkanes

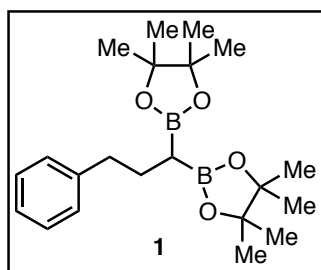

**2,2'-(3-phenylpropane-1,1-diyl)bis(4,4,5,5-tetramethyl-1,3,2-dioxaborolane) (1)** The reaction was performed according to *Representative Procedure (Method A)*. The crude reaction mixture was purified by column chromatography on SiO<sub>2</sub> (92:8 hexanes/ethyl acetate, stain in CAM) to afford a white solid (83% yield).  $R_f = 0.3$  in 90:10 hexanes/ethyl acetate on TLC. <sup>1</sup>H NMR (500 MHz, CDCl<sub>3</sub>)  $\delta$  7.25-7.22 (m, 3H), 7.18-7.12 (m, 2H), 2.59 (t,  $J = 8.0$  Hz, 2H), 1.85 (q,  $J = 8.0$  Hz, 2H), 1.23 (s, 12H), 1.23 (s, 12H), 0.81 (t,  $J = 7.9$  Hz, 1H). <sup>13</sup>C NMR (125 MHz, CDCl<sub>3</sub>)  $\delta$  143.05, 128.68, 128.21, 125.58, 83.07, 38.84, 28.11, 25.02, 24.64. <sup>11</sup>B NMR (128 MHz, CDCl<sub>3</sub>)  $\delta$  33.60. IR (neat)  $\nu_{\max}$  2975 (m), 2928 (w), 2862 (w), 1453 (w), 1358 (m), 1306 (s), 1260 (m), 1216 (m), 1108 (s), 966 (m), 847 (m), 750 (m), 702 (m), 670 (m), 578 (w) cm<sup>-1</sup>. HRMS (ESI) calc. for C<sub>21</sub>H<sub>35</sub>B<sub>2</sub>O<sub>4</sub> [M+H]<sup>+</sup> 373.2721, found 373.2725. Melting point: 79-82 °C.

(4) Matteson, D. S.; Moody, R. J. *Organometallics*, **1982**, *1*, 20.

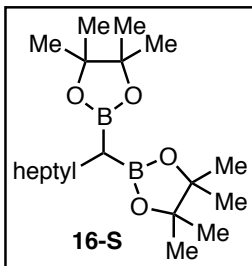

**2,2'-(octane-1,1-diyl)bis(4,4,5,5-tetramethyl-1,3,2-dioxaborolane) (16-S)** The reaction was performed according to *Representative Procedure (Method A)*. The crude reaction mixture was purified by column chromatography on SiO<sub>2</sub> (95:5 hexanes/diethyl ether, stain in CAM) to afford a colorless oil (71% yield).  $R_f = 0.5$  in 90:10 hexanes/ethyl acetate on TLC. <sup>1</sup>H NMR (500 MHz, CDCl<sub>3</sub>)  $\delta$  1.55-1.51 (m, 2H), 1.28-1.24 (m, 8H), 1.23 (s, 12H), 1.22 (s, 12H), 0.86 (t,  $J = 7.0$  Hz, 3H), 0.71 (t,  $J = 7.9$  Hz, 1H). <sup>13</sup>C NMR (125 MHz, CDCl<sub>3</sub>)  $\delta$  82.94, 32.69, 31.95, 29.68, 29.32, 25.79, 24.96, 24.62, 22.77, 14.23. <sup>11</sup>B NMR (128 MHz, CDCl<sub>3</sub>)  $\delta$  33.71. IR (neat)  $\nu_{\max}$  2977 (w), 2924 (w), 2854 (w), 1466 (w), 1355 (m), 1308 (s), 1266 (m), 1214 (w), 1139 (s), 968 (m), 908 (w), 849 (m), 732 (m), 699 (w), 578 (w) cm<sup>-1</sup>. HRMS (ESI) calc. for C<sub>20</sub>H<sub>41</sub>B<sub>2</sub>O<sub>4</sub> [M+H]<sup>+</sup> 367.3191, found 367.3193.

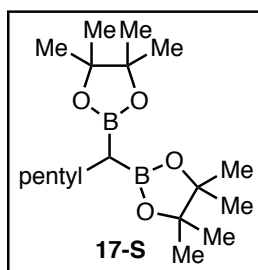

**2,2'-(hexane-1,1-diyl)bis(4,4,5,5-tetramethyl-1,3,2-dioxaborolane) (17-S)** The reaction was performed according to *Representative Procedure (Method A)*. The crude reaction mixture was purified by column chromatography on SiO<sub>2</sub> (90:10 hexanes/ethyl acetate, stain in CAM) to afford a white solid (79% yield).  $R_f = 0.4$  in 90:10 hexanes/ethyl acetate on TLC. <sup>1</sup>H NMR (500 MHz, CDCl<sub>3</sub>)  $\delta$  1.55-1.51 (m, 2H), 1.31-1.24 (m, 6H), 1.23 (s, 12H), 1.22 (s, 12H), 0.85 (t,  $J = 7.0$  Hz, 3H), 0.71 (t,  $J = 7.9$  Hz, 1H). <sup>13</sup>C NMR (125 MHz, CDCl<sub>3</sub>)  $\delta$  143.05, 82.94, 32.33, 31.93, 25.74, 24.96, 24.63, 22.64, 14.14. <sup>11</sup>B NMR (128 MHz, CDCl<sub>3</sub>)  $\delta$  33.03. IR (neat)  $\nu_{\max}$  2977 (m), 2926 (m), 2859 (w), 1466 (w), 1357 (m), 1309 (s), 1265 (m), 1215 (m), 1139 (s), 967 (m), 906 (m), 849 (m), 731 (s), 647 (m), 578 (w) cm<sup>-1</sup>. HRMS (ESI) calc. for C<sub>18</sub>H<sub>37</sub>B<sub>2</sub>O<sub>4</sub> [M+H]<sup>+</sup> 339.2878, found 339.2887.

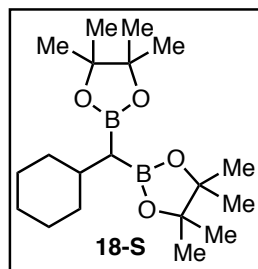

**2,2'-(cyclohexylmethylene)bis(4,4,5,5-tetramethyl-1,3,2-dioxaborolane) (18-S)** The reaction was performed according to *Representative Procedure (Method A)*. The crude reaction mixture was purified by column chromatography on SiO<sub>2</sub> (95:5 hexanes/ethyl acetate, stain in CAM) to afford a white solid (81% yield).  $R_f = 0.5$  in 90:10 hexanes/ethyl acetate on TLC. <sup>1</sup>H NMR (500 MHz, CDCl<sub>3</sub>)  $\delta$  1.79-1.76 (m, 2H), 1.70 (dt,  $J = 10.9, 3.4$  Hz, 1H), 1.66-1.56 (m, 3H), 1.31-1.24 (m, 1H), 1.23 (s, 12H),



1.22 (s, 12H), 1.13-1.04 (m, 1H), 0.91 (qd,  $J = 12.0, 3.1$  Hz, 2H), 0.64 (d,  $J = 10.4$  Hz, 1H).  $^{13}\text{C}$  NMR (125 MHz,  $\text{CDCl}_3$ )  $\delta$  82.90, 36.09, 36.02, 26.87, 26.44, 24.98, 24.68.  $^{11}\text{B}$  NMR (128 MHz,  $\text{CDCl}_3$ )  $\delta$  33.57. IR (neat)  $\nu_{\text{max}}$  2977 (m), 2922 (m), 2851 (w), 1446 (w), 1378 (m), 1343 (s), 1312 (s), 1295 (s), 1265 (w), 1213 (w), 1135 (s), 968 (m), 885 (w), 848 (m), 665 (w), 577 (w)  $\text{cm}^{-1}$ . HRMS (ESI) calc. for  $\text{C}_{19}\text{H}_{37}\text{B}_2\text{O}_4$   $[\text{M}+\text{H}]^+$  351.2878, found 351.2894. Melting point: 82-84  $^\circ\text{C}$ .

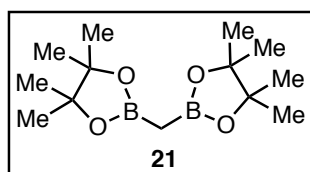

**bis(4,4,5,5-tetramethyl-1,3,2-dioxaborolan-2-yl)methane (21).** The reaction was performed according to *Representative Procedure (Method A)*. The crude reaction mixture was purified by sublimation to afford a white solid (62%) or by column chromatography on  $\text{SiO}_2$

(85:15 hexanes/ethyl acetate, stain in CAM) to afford a white solid (79% yield).  $R_f = 0.3$  in 90:10 hexanes/ethyl acetate on TLC.  $^1\text{H}$  NMR (500 MHz,  $\text{CDCl}_3$ )  $\delta$  1.23 (s, 24H), 0.35 (s, 2H).  $^{13}\text{C}$  NMR (125 MHz,  $\text{CDCl}_3$ )  $\delta$  83.04, 24.79.  $^{11}\text{B}$  NMR (128 MHz,  $\text{CDCl}_3$ )  $\delta$  33.40. IR (neat)  $\nu_{\text{max}}$  2976 (m), 2932 (w), 1448 (w), 1370 (w), 1304 (s), 1266 (s), 1214 (m), 1137 (s), 1090 (m), 966 (s), 895 (m), 844 (s), 674 (m), 578 (w)  $\text{cm}^{-1}$ . HRMS (ESI) calc. for  $\text{C}_{13}\text{H}_{27}\text{B}_2\text{O}_4$   $[\text{M}+\text{H}]^+$  269.2095, found 269.2101. Melting point: 44-48  $^\circ\text{C}$ .

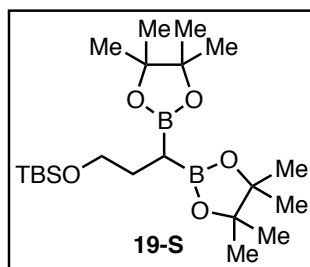

**(3,3-bis(4,4,5,5-tetramethyl-1,3,2-dioxaborolan-2-yl)propoxy)(tert-butyl)dimethylsilane (19-S)** The reaction was performed according to *Representative Procedure (Method A)*. The crude reaction mixture was purified by column chromatography on  $\text{SiO}_2$  (90:10 hexanes/ethyl acetate, stain in CAM) to afford a white solid (82% yield).  $R_f = 0.3$  in 90:10 hexanes/ethyl acetate on TLC.  $^1\text{H}$

NMR (500 MHz,  $\text{CDCl}_3$ )  $\delta$  3.53 (t,  $J = 7.2$  Hz, 2H), 1.75 (q,  $J = 7.4$  Hz, 2H), 1.21 (s, 12H), 1.20 (s, 12H), 0.87 (s, 9H), 0.76 (t,  $J = 7.7$  Hz, 1H), 0.02 (s, 6H).  $^{13}\text{C}$  NMR (125 MHz,  $\text{CDCl}_3$ )  $\delta$  83.06, 65.16, 28.82, 26.17, 25.02, 24.62, 18.53, -5.10.  $^{11}\text{B}$  NMR (128 MHz,  $\text{CDCl}_3$ )  $\delta$  33.68. IR (neat)  $\nu_{\text{max}}$  2976 (m), 2928 (m), 2896 (w), 2856 (w), 1472 (w), 1358 (m), 1313 (s), 1290 (m), 1244 (w), 1213 (m), 1137 (s), 1112 (m), 1070 (m), 967 (m), 902 (w), 834 (s), 767 (s), 665 (m), 578 (w), 532 (w)  $\text{cm}^{-1}$ . HRMS (ESI) calc. for  $\text{C}_{21}\text{H}_{45}\text{B}_2\text{O}_5\text{Si}$   $[\text{M}+\text{H}]^+$  427.3225, found 427.3222. Melting point: 29-32  $^\circ\text{C}$ .

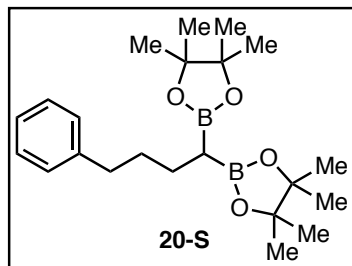

**2,2'-(4-phenylbutane-1,1-diyl)bis(4,4,5,5-tetramethyl-1,3,2-dioxaborolane) (20-S)** The reaction was performed according to *Representative Procedure (Method B)*. The crude reaction mixture was purified by column chromatography on SiO<sub>2</sub> (90:10 hexanes/ethyl acetate, stain in CAM) to afford a colorless oil (94% yield).  $R_f = 0.3$  in 90:10 hexanes/ethyl acetate on TLC. <sup>1</sup>H NMR (500 MHz, CDCl<sub>3</sub>)  $\delta$  7.26-7.23 (m, 2H), 7.17-7.13 (m, 3H), 2.59 (t,  $J = 7.1$  Hz, 2H), 1.65-1.59 (m, 4H), 1.23 (s, 12H), 1.22 (s, 12H), 0.76 (t,  $J = 5.8$  Hz, 1H). <sup>13</sup>C NMR (125 MHz, CDCl<sub>3</sub>)  $\delta$  143.11, 128.42, 128.24, 125.50, 83.01, 36.14, 34.44, 25.67, 24.98, 24.63. <sup>11</sup>B NMR (128 MHz, CDCl<sub>3</sub>)  $\delta$  33.87. IR (neat)  $\nu_{\max}$  3026 (w), 2977 (w), 2929 (w), 2851 (w), 1454 (w), 1359 (m), 1308 (s), 1265 (m), 1213 (w), 1136 (s), 968 (m), 908 (m), 849 (m), 730 (s), 698 (s), 669 (m), 578 (w) cm<sup>-1</sup>. HRMS (ESI) calc. for C<sub>22</sub>H<sub>37</sub>B<sub>2</sub>O<sub>4</sub> [M+H]<sup>+</sup> 387.2878, found 387.2870.

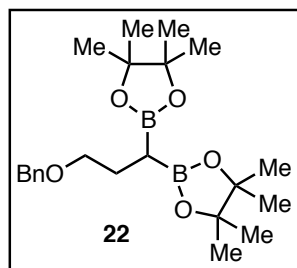

**(R)-2-(1-(benzofuran-5-yl)-3-phenylpropyl)-4,4,5,5-tetramethyl-1,3,2-dioxaborolane (22)**. The reaction was performed according to *Representative Procedure (Method B)*. The crude reaction mixture was purified by column chromatography on SiO<sub>2</sub> (90:10 hexanes/ethyl acetate, stain in CAM) to afford a colorless oil (70% yield).  $R_f = 0.5$  in 80:20 hexanes/ethyl acetate on TLC. <sup>1</sup>H NMR (500 MHz, CDCl<sub>3</sub>) 7.35-7.29 (m, 4H), 7.24 (t,  $J = 7.0$  Hz, 1H), 4.49 (s, 2H), 3.41 (t,  $J = 6.7$  Hz, 2H), 1.87 (q,  $J = 7.1$  Hz, 2H), 1.21 (s, 12H), 1.19 (s, 12H). <sup>13</sup>C NMR (125 MHz, CDCl<sub>3</sub>)  $\delta$  138.94, 128.21, 127.56, 127.23, 82.93, 72.46, 71.83, 25.68, 24.82, 24.47. <sup>11</sup>B NMR (128 MHz, CDCl<sub>3</sub>)  $\delta$  33.43. IR (neat)  $\nu_{\max}$  2976 (m), 2930 (w), 2855 (m), 1454 (w), 1356 (s), 1308 (s), 1267 (m), 1214 (w), 1138 (s), 1102 (m), 968 (m), 901 (w), 848 (s), 734 (m), 697 (m), 699 (m) cm<sup>-1</sup>. HRMS (ESI) calc. for C<sub>22</sub>H<sub>36</sub>B<sub>2</sub>O<sub>5</sub> [M+H]<sup>+</sup> 403.2827, found 403.2833.

## ***V. Procedures for Enantiotopic-Group-Selective Suzuki-Miyaura Coupling***

### ***For Aryl Iodides (Method C; Conditions A of Main Text):***

In the glove box, an oven-dried 1-dram vial equipped with magnetic stir bar was charged with 1,1-diborylalkane (0.11 mmol), aryl iodide (0.1 mmol), and (*R,R*)-TADDOL-derived phosphoramidate ligand (**L3**) (6.0 mg, 0.01 mmol). The vial was sealed with rubber septum, removed from the glove box. A stock solution of Pd(OAc)<sub>2</sub> in 1,4-dioxane (0.2 mL, 0.024 M, 5 μmol) was added *via* syringe followed by the addition of freshly degassed KOH<sub>(aq)</sub><sup>5</sup> (188 μL, 8.0 M, 1.5 mmol) and the mixture was allowed to stir at room temperature for 12 hours. Upon completion, the reaction mixture was diluted with diethyl ether (2 mL) and filtered through a short plug of silica gel. The filtrate was concentrated under vacuum and purified on silica gel (hexanes/ethyl acetate or hexanes/dichloromethane, stain in CAM) to give the desired product.

Note that the reaction can also be performed without the need for a glove box, which leads to the same yields and enantioselectivities. A 1-dram vial with magnetic stir bar was charged with 1,1-diborylalkane (0.11 mmol), aryl iodide (0.1 mmol), and (*R,R*)-TADDOL-derived phosphoramidate ligand (**L3**) (6.0 mg, 0.01 mmol). The vial was sealed with rubber septum, and purged with N<sub>2</sub> for 10 minutes. A solution of Pd(OAc)<sub>2</sub> in 1,4-dioxane stock solution (0.2 mL, 0.024 M, 5 μmol) was added *via* syringe followed by the addition of freshly degassed KOH<sub>(aq)</sub> (188 μL, 8.0 M, 1.5 mmol) and the mixture was allowed to stir at room temperature for 12 hours. Upon completion, the reaction mixture was diluted with diethyl ether (2 mL) and filtered through a short plug of silica gel. The filtrate was concentrated under vacuum and purified on silica gel (hexanes/ethyl acetate or hexanes/dichloromethane, stain in CAM) to give the desired product.

### ***For Aryl Bromides (Method D; Conditions B of Main Text):***

In the glove box, an oven-dried 1-dram vial with magnetic stir bar was charged with 1,1-diborylalkane (0.11 mmol), aryl bromide (0.1 mmol), NaI (16.5 mg, 0.11 mmol) and (*R,R*)-TADDOL-derived phosphoramidate ligand (**L3**) (6.0 mg, 0.01 mmol). The vial was sealed with rubber septum, removed from the glove box. A solution of Pd(OAc)<sub>2</sub> in 1,4-dioxane stock solution (0.2 mL, 0.024 M, 5 μmol) was added *via* syringe followed by the addition of freshly degassed KOH<sub>(aq)</sub> (188 μL, 8.0 M, 1.5 mmol) and the mixture was allowed to stir at room

---

(5) KOH<sub>(aq)</sub> was sparged with N<sub>2</sub> for 30 min at room temperature before using.

temperature for 12 hours. Upon completion, the reaction mixture was diluted with diethyl ether (2 mL) and filtered through a short plug of silica gel. The filtrate was concentrated under vacuum and purified on silica gel (hexanes/ethyl acetate or hexanes/dichloromethane, stain in CAM) to give the desired product.

Note that the reaction can also be performed without need for a glove box, which leads to the same yields and enantioselectivities. A 1-dram vial with magnetic stir bar was charged with 1,1-diborylalkane (0.11 mmol), aryl bromide (0.1 mmol), NaI (16.5 mg, 0.11 mmol) and (*R,R*)-TADDOL-derived phosphoramidate ligand (**L3**) (6.0 mg, 0.01 mmol). The vial was sealed with rubber septum, and purged with N<sub>2</sub> for 10 min. A solution of Pd(OAc)<sub>2</sub> in 1,4-dioxane stock solution (0.2 mL, 0.024 M, 5 μmol) was added *via* syringe followed by the addition of freshly degassed KOH<sub>(aq)</sub> (188 μL, 8.0 M, 1.5 mmol) and the mixture was allowed to stir at room temperature for 12 hours. Upon completion, the reaction mixture was diluted with diethyl ether (2 mL) and filtered through a short plug of silica gel. The filtrate was concentrated under vacuum and purified on silica gel (hexanes/ethyl acetate or hexanes/dichloromethane, stain in CAM) to give the desired product.

## VI. Characterization of Reaction Products and Analysis of Stereochemistry

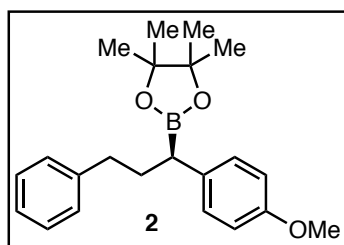

**(*R*)-2-(1-(4-methoxyphenyl)-3-phenylpropyl)-4,4,5,5-tetramethyl-1,3,2-dioxaborolane (2).** The reaction was performed according to *Representative Procedure (Method C)*. The crude reaction mixture was purified by column chromatography on SiO<sub>2</sub> (97:3 hexanes/diethyl ether, stain in CAM) to afford a yellow oil (29.0 mg, 82% yield). *R<sub>f</sub>* = 0.4 in 90:10 hexanes/ethyl acetate on

TLC. <sup>1</sup>H NMR (500 MHz, CDCl<sub>3</sub>) 7.27-7.24 (m, 2H), 7.17-7.13 (m, 5H), 6.84-6.81 (m, 2H), 3.79 (s, 3H), 2.56 (t, *J* = 7.4 Hz, 2H), 2.30 (t, *J* = 7.9 Hz, 1H), 2.17-2.09 (m, 1H), 1.98-1.91 (m, 1H), 1.22 (s, 6H), 1.20 (s, 6H). <sup>13</sup>C NMR (125 MHz, CDCl<sub>3</sub>) δ 157.51, 142.77, 135.02, 129.41, 128.62, 128.34, 125.72, 113.92, 83.40, 55.32, 35.48, 34.73, 24.83, 24.74. <sup>11</sup>B NMR (128 MHz, CDCl<sub>3</sub>) δ 33.29. IR (neat) *v*<sub>max</sub> 3061 (w), 3026 (w), 2976 (m), 2929 (m), 2857 (w), 2834 (w), 1607 (m), 1508 (s), 1454 (m), 1359 (s), 1321 (s), 1322 (s), 1244 (s), 1141 (s), 1037 (m), 967 (m), 850 (m), 828 (m), 749 (m), 699 (m), 529 (w) cm<sup>-1</sup>. HRMS (ESI) calc. for C<sub>22</sub>H<sub>30</sub>BO<sub>3</sub> [M+H]<sup>+</sup> 353.2288, found 353.2277. [α]<sub>D</sub><sup>20</sup>: -16.97 (c = 0.85, CHCl<sub>3</sub>, *l* = 50 mm).

**Analysis of Stereochemistry:**

The enantioselectivity was determined by SFC analysis of the reaction product. The analogous racemic material was prepared using RuPhos as the achiral ligand in the cross coupling reaction. The absolute configuration was assigned by comparing the optical rotation of the corresponding alcohol after the oxidation with the reported value in the literature.<sup>6</sup>

*Chiral SFC (OD-H, Chiraldex, 3 mL/min, 2% <sup>1</sup>PrOH, 100 bar, 35 °C)-analysis of the reaction product.*

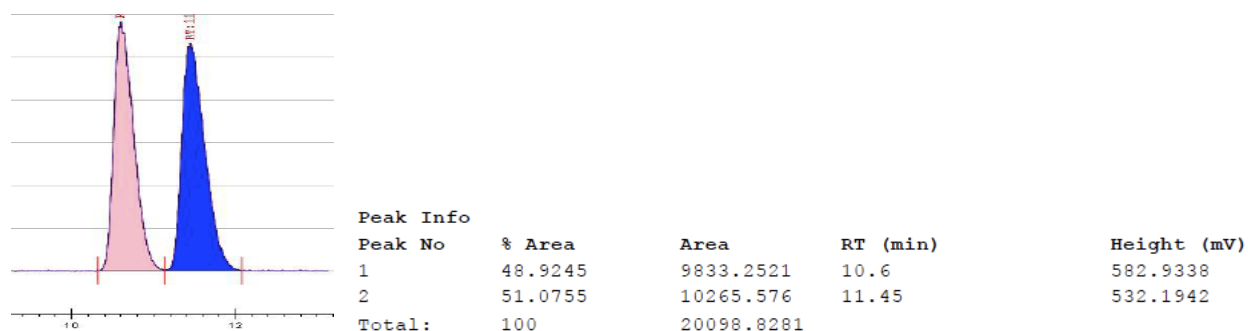

**Racemic**

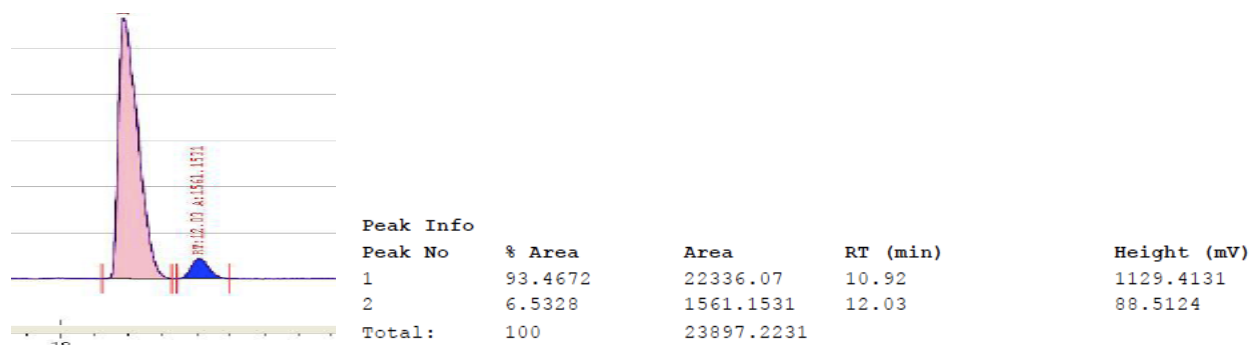

**Reaction product**

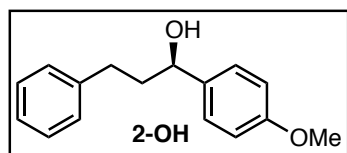

**(R)-1-(4-methoxyphenyl)-3-phenylpropan-1-ol (2-OH).**

Prepared by oxidation of the boronate with NaOH/H<sub>2</sub>O<sub>2</sub> in THF. The crude reaction mixture was purified by column chromatography on SiO<sub>2</sub> (80:20 hexanes/ethyl acetate, stain in CAM) to afford a colorless oil. R<sub>f</sub> = 0.5 in 75:25 hexanes/ethyl acetate on TLC. <sup>1</sup>H NMR (500 MHz, CDCl<sub>3</sub>) 7.30-7.26 (m, 4H), 7.20-7.17 (m, 3H), 6.91-6.88 (m, 2H), 4.64 (t, *J* = 6.0 Hz, 1H), 3.79 (s, 3H), 2.73 (ddd, *J* = 14.3,

(6) Liu, Y.; Da, C.-S.; Yu, S.-L.; Yin, X.-G.; Wang, J.-R.; Fan, X.-Y.; Li, W.-P.; Wang, R. *J. Org. Chem.* **2010**, *75*, 6869.

9.4, 5.4 Hz, 1H), 2.68-2.61 (m, 1H), 2.14 (dddd,  $J = 13.6, 9.6, 7.7, 5.9$  Hz, 1H), 2.01 (ddt,  $J = 13.6, 9.7, 6.0$  Hz, 1H), 1.83 (s, 1H).  $^{13}\text{C}$  NMR (125 MHz,  $\text{CDCl}_3$ )  $\delta$  159.09, 141.80, 136.67, 128.40, 128.34, 127.17, 125.79, 113.87, 73.47, 55.27, 40.32, 32.11. IR (neat)  $\nu_{\text{max}}$  3258 (br), 3024 (w), 3000 (w), 2948 (m), 2926 (m), 2880 (w), 2834 (w), 1608 (m), 1510 (s), 1445 (m), 1341 (w), 1301 (m), 1243 (s), 1176 (m), 1023 (m), 1002 (m), 833 (m), 820 (m), 701 (m)  $\text{cm}^{-1}$ . HRMS (ESI) calc. for  $\text{C}_{16}\text{H}_{17}\text{O}$   $[\text{M}+\text{H}-\text{H}_2\text{O}]^+$  225.1279, found 225.1284.  $[\alpha]_{\text{D}}^{20}$ : 10.34 ( $c = 0.86$ ,  $\text{CHCl}_3$ ,  $l = 50$  mm). The absolute stereochemistry was assigned by comparing the optical rotation with the reported value in the literature (for (*S*)-**2-OH**,  $[\alpha]_{\text{D}}^{20}$ : -26 ( $c = 1.0$ ,  $\text{CH}_3\text{OH}$ )).<sup>6</sup>

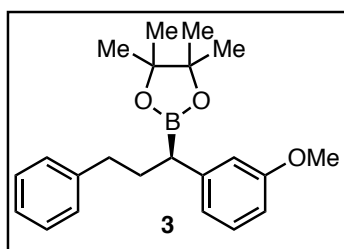

**(*R*)-2-(1-(3-methoxyphenyl)-3-phenylpropyl)-4,4,5,5-tetramethyl-1,3,2-dioxaborolane (3).** The reaction was performed according to *Representative Procedure (Method C)*. The crude reaction mixture was purified by column chromatography on  $\text{SiO}_2$  (98:2 hexanes/diethyl ether, stain in CAM) to afford a colorless oil

(21.8 mg, 62% yield).  $R_f = 0.4$  in 90:10 hexanes/ethyl acetate on TLC.  $^1\text{H}$  NMR (500 MHz,  $\text{CDCl}_3$ )  $\delta$  7.28-7.23 (m, 2H), 7.20-7.16 (m, 4H), 6.82 (d,  $J = 7.6$  Hz, 1H), 6.79 (t,  $J = 2.0$  Hz, 1H), 6.70 (dd,  $J = 8.2, 2.6$  Hz, 1H), 3.80 (s, 3H), 2.57 (quintet,  $J = 7.7$  Hz, 2H), 2.34 (t,  $J = 7.9$  Hz, 1H), 2.19-2.11 (m, 1H), 2.02-1.95 (m, 1H), 1.22 (s, 6H), 1.20 (s, 6H).  $^{13}\text{C}$  NMR (125 MHz,  $\text{CDCl}_3$ )  $\delta$  159.58, 144.55, 142.51, 129.16, 128.47, 128.19, 125.59, 120.92, 113.98, 110.76, 83.32, 55.07, 35.37, 34.28, 24.66, 24.60.  $^{11}\text{B}$  NMR (128 MHz,  $\text{CDCl}_3$ )  $\delta$  33.19. IR (neat)  $\nu_{\text{max}}$  3083 (w), 3061 (w), 3025 (m), 2976 (m), 2930 (w), 2858 (m), 1599 (m), 1581 (m), 1487 (m), 1454 (m), 1359 (m), 1322 (m), 1259 (m), 1141 (s), 1047 (m), 967 (w), 864 (w), 778 (w), 749 (w), 699 (m)  $\text{cm}^{-1}$ . HRMS (ESI) calc. for  $\text{C}_{22}\text{H}_{30}\text{BO}_3$   $[\text{M}+\text{H}]^+$  353.2288, found 353.2298.  $[\alpha]_{\text{D}}^{20}$ : -6.05 ( $c = 0.71$ ,  $\text{CHCl}_3$ ,  $l = 50$  mm).

#### ***Analysis of Stereochemistry:***

The enantioselectivity was determined by SFC analysis of the reaction product. The analogous racemic material was prepared using RuPhos as the achiral ligand in the cross coupling reaction. The absolute stereochemistry was assigned by analogy.

Chiral SFC (OD-H, Chiraldex, 3 mL/min, 2% <sup>i</sup>PrOH, 100 bar, 35 °C)-analysis of the reaction product.

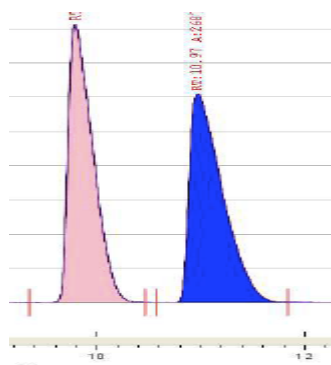

| Peak Info |        |            |          |             |
|-----------|--------|------------|----------|-------------|
| Peak No   | % Area | Area       | RT (min) | Height (mV) |
| 1         | 49.686 | 26537.0533 | 9.79     | 1625.006    |
| 2         | 50.314 | 26872.5008 | 10.97    | 1217.9811   |
| Total:    | 100    | 53409.5541 |          |             |

Racemic

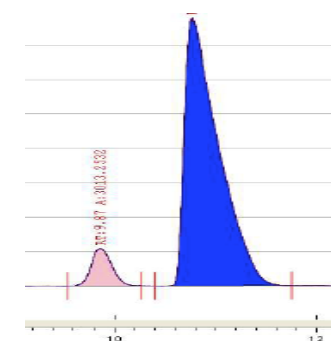

| Peak Info |         |            |          |             |
|-----------|---------|------------|----------|-------------|
| Peak No   | % Area  | Area       | RT (min) | Height (mV) |
| 1         | 7.7208  | 3013.2532  | 9.87     | 216.0845    |
| 2         | 92.2792 | 36014.6454 | 10.77    | 1561.4805   |
| Total:    | 100     | 39027.8986 |          |             |

Reaction product

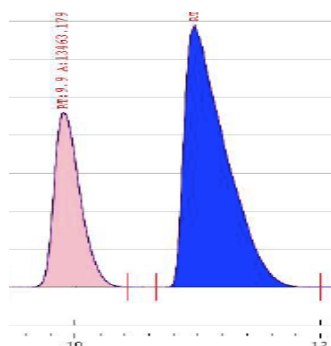

| Peak Info |        |            |          |             |
|-----------|--------|------------|----------|-------------|
| Peak No   | % Area | Area       | RT (min) | Height (mV) |
| 1         | 29.819 | 13463.179  | 9.9      | 918.8884    |
| 2         | 70.181 | 31686.5253 | 10.97    | 1380.2182   |
| Total:    | 100    | 45149.7043 |          |             |

Co-injection of product + racemic

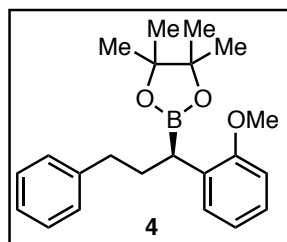

**(R)-2-(1-(2-methoxyphenyl)-3-phenylpropyl)-4,4,5,5-tetramethyl-1,3,2-dioxaborolane (4).** The reaction was performed according to *Representative Procedure (Method C)*. The crude reaction mixture was purified by column chromatography on SiO<sub>2</sub> (98:2 hexanes/diethyl ether, stain in CAM) to afford a colorless oil (19.3mg, 55% yield). R<sub>f</sub> =

0.4 in 90:10 hexanes/ethyl acetate on TLC. <sup>1</sup>H NMR (500 MHz, CDCl<sub>3</sub>) δ 7.25-7.22 (m, 2H), 7.17-7.12 (m, 4H), 6.88 (td, *J* = 7.4, 1.1 Hz, 1H), 6.81 (dd, *J* = 8.1, 0.8 Hz, 1H), 3.78 (s, 3H), 2.57 (t, *J* = 8.2 Hz, 2H), 2.48 (dd, *J* = 8.4, 6.9 Hz, 1H), 2.17-2.09 (m, 1H), 2.00-1.92 (m, 1H), 1.23 (s, 6H), 1.21 (s, 6H). <sup>13</sup>C NMR (125 MHz, CDCl<sub>3</sub>) δ 157.06, 143.00, 131.89, 129.79, 128.50, 128.10, 126.34, 125.43, 120.51, 83.01, 55.02, 35.38, 32.52, 24.80, 24.67. <sup>11</sup>B NMR (128 MHz, CDCl<sub>3</sub>) δ 33.75. IR (neat) ν<sub>max</sub> 3061 (w), 3024 (w), 2977 (m), 2931 (s), 2859 (w), 2834 (w), 1491 (s), 1456 (m), 1437 (w), 1359 (s), 1317 (m), 1268 (w), 1240 (s), 1143 (s), 1111 (w), 1030 (w), 967 (w), 852 (w), 750 (m), 699 (w) cm<sup>-1</sup>. HRMS (ESI) calc. for C<sub>22</sub>H<sub>30</sub>BO<sub>3</sub> [M+H]<sup>+</sup> 353.2288, found 353.2298. [α]<sub>D</sub><sup>20</sup>: -17.44 (c = 0.47, CHCl<sub>3</sub>, *l* = 50 mm).

#### Analysis of Stereochemistry:

The enantioselectivity was determined by SFC analysis of the reaction product. The analogous racemic material was prepared using RuPhos as the achiral ligand in the cross coupling reaction. The absolute stereochemistry was assigned by analogy.

*Chiral SFC (OD-H, Chiraldex, 3 mL/min, 1% <sup>i</sup>PrOH, 100 bar, 35 °C)-analysis of the reaction product.*

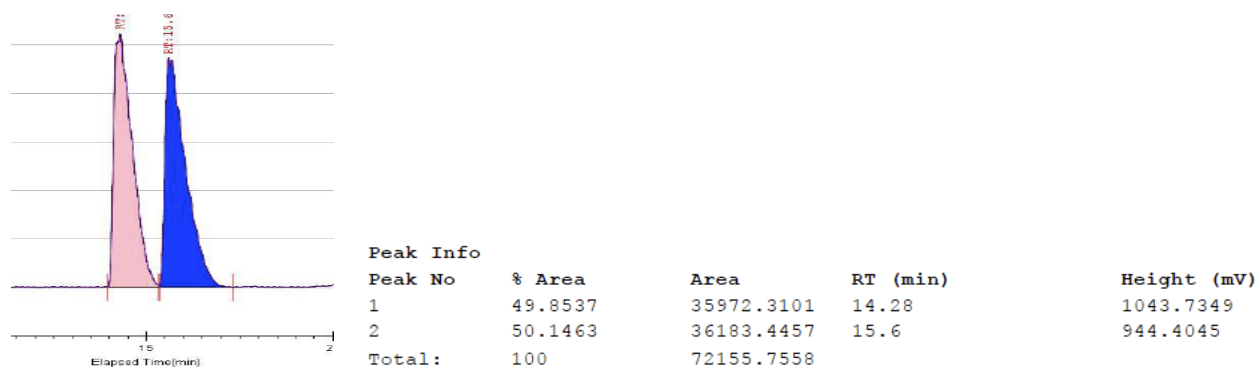

Racemic



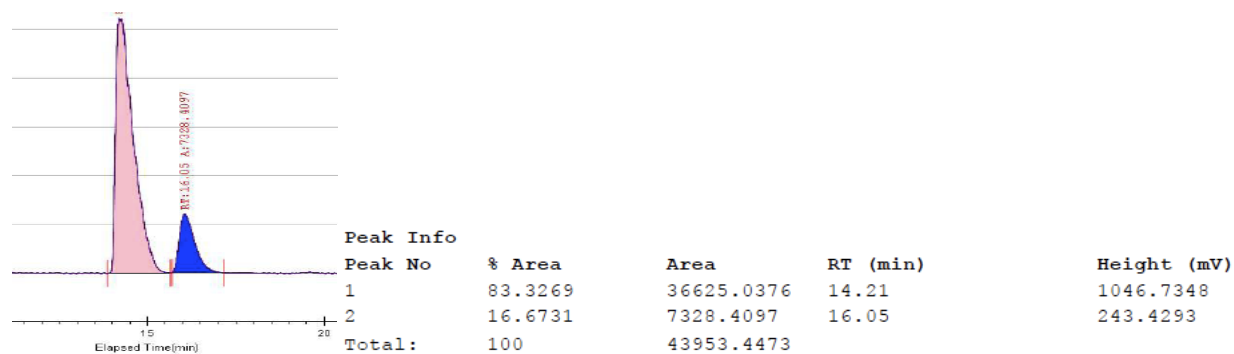

## Reaction product

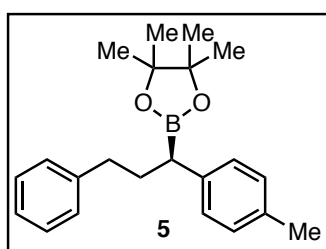

**(R)-4,4,5,5-tetramethyl-2-(3-phenyl-1-(p-tolyl)propyl)-1,3,2-dioxaborolane (5).** The reaction was performed according to *Representative Procedure (Method C)*. The crude reaction mixture was purified by column chromatography on SiO<sub>2</sub> (99:1 hexanes/diethyl ether, stain in CAM) to afford a colorless oil (24.0

mg, 72% yield).  $R_f = 0.4$  in 95:5 hexanes/ethyl acetate on TLC. <sup>1</sup>H NMR (500 MHz, CDCl<sub>3</sub>) 7.28-7.25 (m, 2H), 7.18-7.15 (m, 3H), 7.14-7.08 (m, 4H), 2.58 (t,  $J = 8.0$  Hz, 2H), 2.33 (t,  $J = 7.8$  Hz, 1H), 2.32 (s, 3H), 2.19-2.12 (m, 1H), 2.01-1.94 (m, 1H), 1.23 (s, 6H), 1.21 (s, 6H). <sup>13</sup>C NMR (125 MHz, CDCl<sub>3</sub>)  $\delta$  142.62, 139.73, 134.52, 129.03, 128.48, 128.27, 128.17, 125.56, 83.25, 35.39, 34.48, 24.68, 24.60, 20.99. <sup>11</sup>B NMR (128 MHz, CDCl<sub>3</sub>)  $\delta$  33.39. IR (neat)  $\nu_{\max}$  3024 (w), 2976 (m), 2925 (m), 2860 (w), 1603 (w), 1510 (m), 1495 (m), 1453 (m), 1358 (s), 1319 (s), 1267 (m), 1232 (m), 1214 (s), 1140 (s), 1109 (m), 966 (m), 849(m), 815 (s), 749 (s), 698 (s) cm<sup>-1</sup>. HRMS (ESI) calc. for C<sub>21</sub>H<sub>36</sub>BO<sub>3</sub> [M+H]<sup>+</sup> 337.2339, found 337.2344.  $[\alpha]_D^{20}$ : -13.20 (c = 1.24, CHCl<sub>3</sub>,  $l = 50$  mm).

**Analysis of Stereochemistry:**

The enantioselectivity was determined by SFC analysis of the oxidized reaction product. The analogous racemic material was prepared using RuPhos as the achiral ligand in the cross coupling reaction followed by oxidation. The absolute stereochemistry was assigned by comparing the optical rotation of the corresponding alcohol with the reported value in the literature.<sup>6</sup>

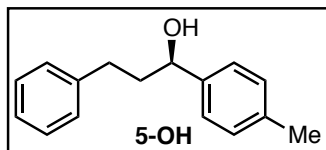

**(R)-3-phenyl-1-(p-tolyl)propan-1-ol (5-OH).** Prepared by oxidation of the boronate with NaOH/H<sub>2</sub>O<sub>2</sub> in THF. The crude reaction mixture was purified by column chromatography on SiO<sub>2</sub> (85:15 hexanes/ethyl acetate, stain in CAM) to afford a colorless oil.  $R_f = 0.5$  in 80:20 hexanes/ethyl acetate on TLC. <sup>1</sup>H NMR (500 MHz, CDCl<sub>3</sub>) 7.30-7.24 (m, 4H), 7.21-7.16 (m, 5H), 4.66 (t,  $J = 6.5$  Hz 1H), 2.78-2.70 (m, 1H), 2.70-2.63 (m, 1H), 2.36 (s, 3H), 2.18-2.09 (m, 1H), 2.08-1.99 (m, 1H), 1.85 (br, 1H). <sup>13</sup>C NMR (125 MHz, CDCl<sub>3</sub>)  $\delta$  141.83, 141.56, 137.31, 129.17, 128.42, 128.35, 125.88, 125.80, 73.72, 40.35, 32.09, 21.10. IR (neat)  $\nu_{\max}$  3386 (br), 3060 (w), 3025 (w), 2922 (m), 2859 (w), 1603 (w), 1513 (m), 1495 (m), 1453 (s), 1060 (s), 1032 (s), 1301 (m), 924 (m), 818 (s), 749 (m), 699 (s) cm<sup>-1</sup>. HRMS (ESI) calc. for C<sub>15</sub>H<sub>23</sub>O<sub>1</sub> [M+H-H<sub>2</sub>O]<sup>+</sup> 225.1279, found 225.1285.  $[\alpha]_D^{20}$ : 19.43 (c = 0.68, CHCl<sub>3</sub>,  $l = 50$  mm).

**Proof of Stereochemistry:**

The absolute stereochemistry was assigned by comparing the optical rotation with the reported value in the literature (for (S)-**5-OH**,  $[\alpha]_D^{20}$ : -16 (c = 2.2, CH<sub>3</sub>OH)).<sup>6</sup>

*Chiral SFC (OD-H, Chiraldex, 3 mL/min, 10% <sup>i</sup>PrOH, 100 bar, 35 °C)-analysis of the reaction product.*

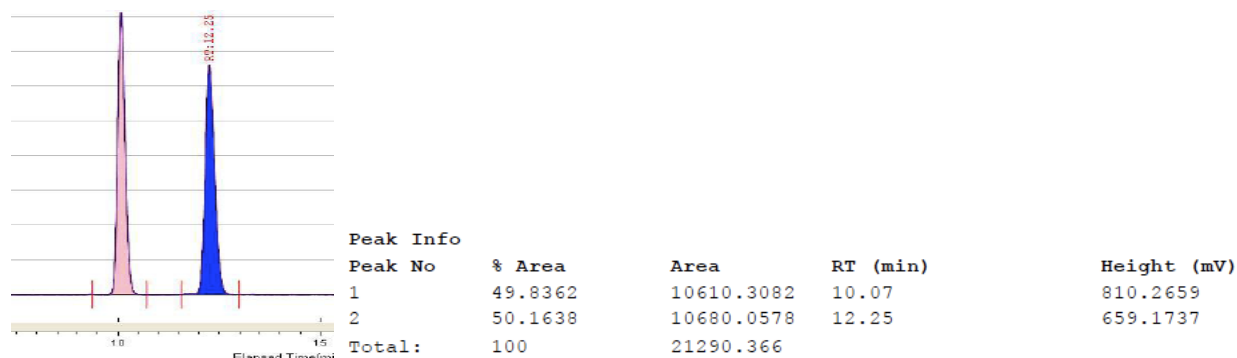

## Racemic

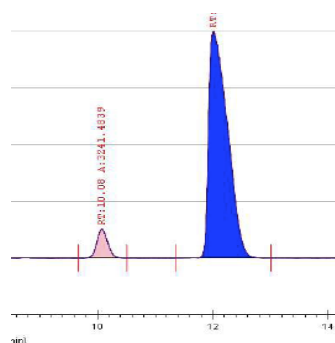

## Peak Info

| Peak No | % Area  | Area       | RT (min) | Height (mV) |
|---------|---------|------------|----------|-------------|
| 1       | 6.7024  | 3241.4839  | 10.08    | 252.9248    |
| 2       | 93.2976 | 45121.4182 | 12.01    | 1992.2415   |
| Total:  | 100     | 48362.9021 |          |             |

## Reaction product

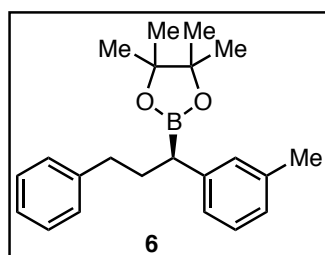

**(R)-4,4,5,5-tetramethyl-2-(3-phenyl-1-(*m*-tolyl)propyl)-1,3,2-dioxaborolane (6).** The reaction was performed according to *Representative Procedure (Method C)*. The crude reaction mixture was purified by column chromatography on SiO<sub>2</sub> (99:1 hexanes/diethyl ether, stain in CAM) to afford a colorless oil (28.1

mg, 84% yield).  $R_f = 0.4$  in 95:5 hexanes/ethyl acetate on TLC. <sup>1</sup>H NMR (500 MHz, CDCl<sub>3</sub>) 7.28-7.25 (m, 2H), 7.18-7.15 (m, 4H), 7.04 (s, 1H), 7.04 (d,  $J = 7.6$  Hz, 1H), 6.97 (d,  $J = 7.6$  Hz, 1H), 2.58 (t,  $J = 8.0$  Hz, 2H), 2.33 (t,  $J = 7.5$  Hz, 1H), 2.33 (s, 3H), 2.16 (dq,  $J = 13.4, 7.9$  Hz, 1H), 1.98 (dq,  $J = 13.4, 8.0$  Hz, 1H), 1.23 (s, 6H), 1.21 (s, 6H). <sup>13</sup>C NMR (125 MHz, CDCl<sub>3</sub>)  $\delta$  142.80, 142.61, 137.71, 129.26, 128.47, 128.18, 128.16, 126.00, 125.57, 125.35, 83.27, 35.47, 34.40, 24.66, 24.59, 21.47. <sup>11</sup>B NMR (128 MHz, CDCl<sub>3</sub>)  $\delta$  33.31. IR (neat)  $\nu_{\max}$  3061 (w), 3025 (w), 2977 (m), 2927 (m), 2859 (w), 1455 (w), 1360 (s), 1322 (s), 1268 (w), 1165 (w), 1142 (s), 989 (w), 871 (w), 850 (w), 786 (w), 748 (w), 699 (w) cm<sup>-1</sup>. HRMS (ESI) calc. for C<sub>22</sub>H<sub>30</sub>BO<sub>2</sub> [M+H]<sup>+</sup> 337.2339, found 337.2343.  $[\alpha]_D^{20}$ : -12.53 (c = 1.21, CHCl<sub>3</sub>,  $l = 50$  mm).

**Analysis of Stereochemistry:**

The enantioselectivity was determined by SFC analysis of the reaction product. The analogous racemic material was prepared using RuPhos as the achiral ligand in the cross coupling reaction. The absolute stereochemistry was assigned by analogy.

Chiral SFC (OJ-H, Chiraldex, 2 mL/min, 2% *i*PrOH, 100 bar, 35 °C)-analysis of the reaction product.

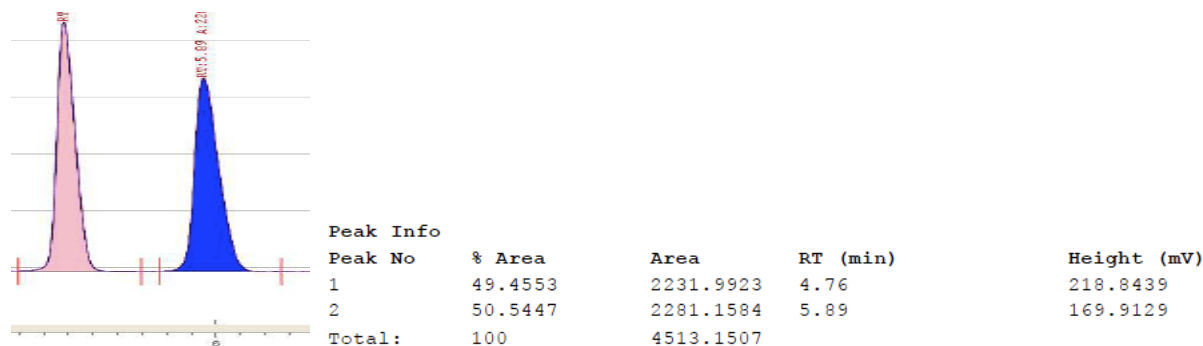

Racemic

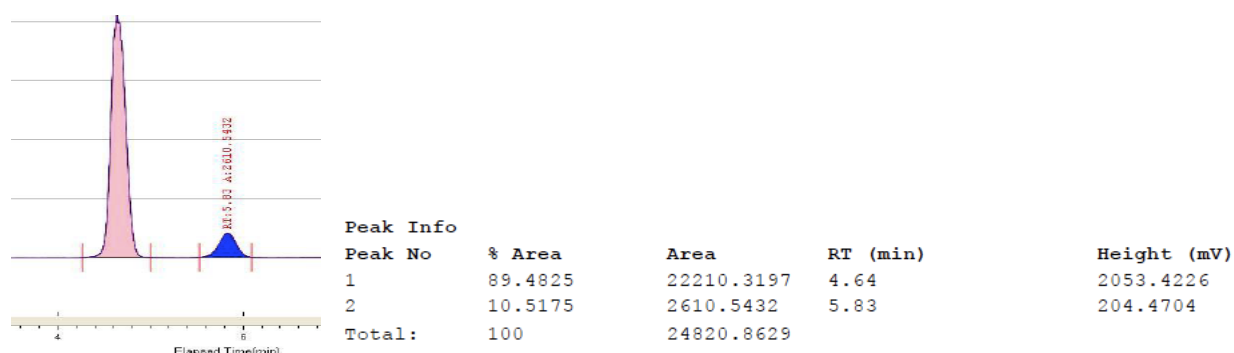

Reaction product

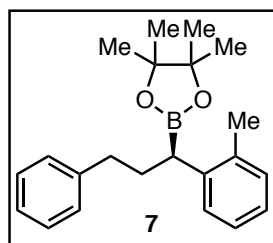

**(R)-4,4,5,5-tetramethyl-2-(3-phenyl-1-(*o*-tolyl)propyl)-1,3,2-dioxaborolane (7).** The reaction was performed according to *Representative Procedure (Method C)*. The crude reaction mixture was purified by column chromatography on SiO<sub>2</sub> (99:1 hexanes/diethyl ether, stain in CAM) to afford a colorless oil (22.3 mg, 67% yield). *R<sub>f</sub>* = 0.4 in 95:5 hexanes/ethyl acetate on TLC. <sup>1</sup>H NMR (500 MHz, CDCl<sub>3</sub>) 7.27-7.24 (m, 4H), 7.14-7.11 (m, 5H), 7.06-7.03 (m, 1H), 2.63-2.57 (m, 1H), 2.55 (t, *J* = 7.9 Hz, 1H), 2.26 (s, 3H), 2.19 (td, *J* = 14.5, 8.8 Hz, 1H), 1.97 (ddt, *J* = 13.7, 9.7, 6.9 Hz, 1H), 1.22 (s, 6H), 1.20 (s, 6H). <sup>13</sup>C NMR (125 MHz, CDCl<sub>3</sub>) δ 142.58, 141.30, 136.04, 130.11, 128.46, 128.20, 127.62, 125.92, 125.60, 124.99, 83.22, 35.50, 33.83, 24.73, 24.58, 20.07. <sup>11</sup>B NMR (128 MHz, CDCl<sub>3</sub>) δ 33.39. IR (neat)  $\nu_{\max}$  3061 (w), 3025 (w), 2977 (m), 2929 (m), 2860 (w), 1506 (w), 1489 (w), 1455 (w), 1370 (s), 1357 (s), 1321 (s), 1322 (s), 1268 (s), 1234 (w), 1165 (w), 1142 (s), 966 (w), 850 (m), 748 (m), 730 (m), 699 (m) cm<sup>-1</sup>. HRMS (ESI) calc. for C<sub>22</sub>H<sub>30</sub>BO<sub>2</sub> [M+H]<sup>+</sup> 337.2339, found 337.2332. [ $\alpha$ ]<sub>D</sub><sup>20</sup>: 3.68 (c = 1.07, CHCl<sub>3</sub>, *l* = 50 mm).

### Analysis of Stereochemistry:

The enantioselectivity was determined by SFC analysis of the reaction product. The analogous racemic material was prepared using RuPhos as the achiral ligand in the cross coupling reaction. The absolute stereochemistry was assigned by analogy.

*Chiral SFC (OJ-H, Chiraldex, 3 mL/min, 2% <sup>i</sup>PrOH, 100 bar, 35 °C)-analysis of the reaction product.*

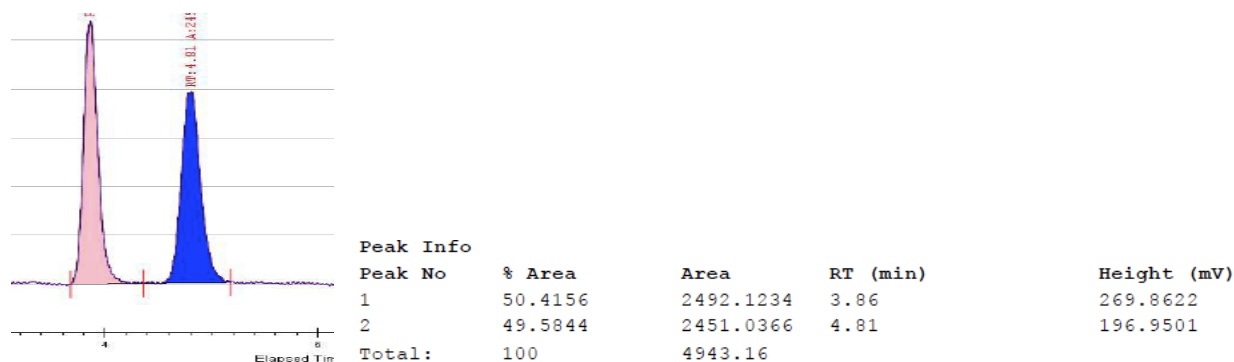

### Racemic

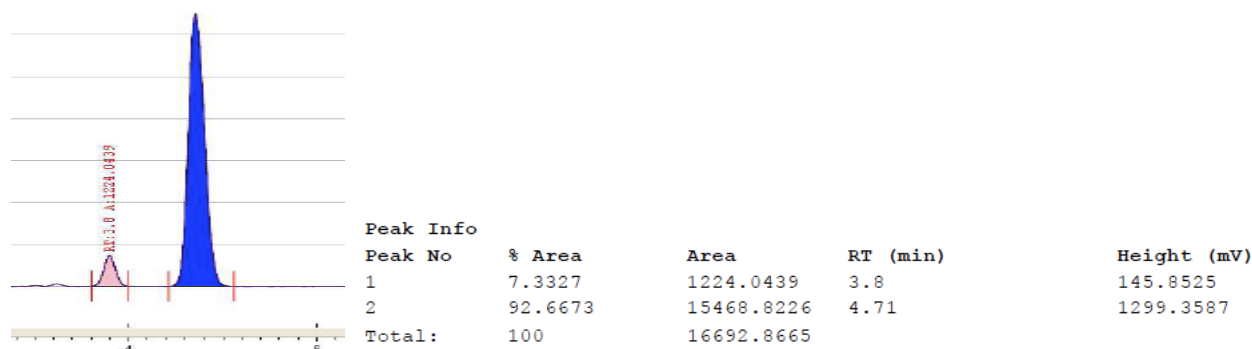

### Reaction product

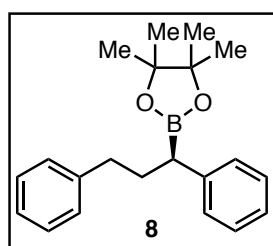

**(R)-2-(1,3-diphenylpropyl)-4,4,5,5-tetramethyl-1,3,2-dioxaborolane (8).** The reaction was performed according to *Representative Procedure (Method C)*. The crude reaction mixture was purified by column chromatography on SiO<sub>2</sub> (99:1 hexanes/diethyl ether, stain in CAM) to afford a brown oil (28.5 mg, 88% yield). *R<sub>f</sub>* = 0.4 in 95:5 hexanes/ethyl acetate on TLC. <sup>1</sup>H NMR (500 MHz, CDCl<sub>3</sub>) δ 7.31-7.23 (m, 6H), 7.18-7.14 (m, 4H), 2.59 (t, *J* = 8.0 Hz, 2H), 2.38 (t, *J* = 7.9 Hz, 1H), 2.22-2.14 (m, 1H), 2.00 (dq, *J* = 13.4, 8.0 Hz, 1H), 1.23 (s, 6H), 1.21 (s, 6H). <sup>13</sup>C NMR (125 MHz, CDCl<sub>3</sub>) δ 142.91, 142.54, 128.48, 128.40, 128.30,

128.21, 125.60, 125.22, 83.31, 35.40, 34.33, 24.68, 24.58.  $^{11}\text{B}$  NMR (128 MHz,  $\text{CDCl}_3$ )  $\delta$  33.26. IR (neat)  $\nu_{\text{max}}$  3083 (w), 3061 (w), 3025 (m), 2977 (m), 2929 (m), 2858 (w), 1494 (m), 1453 (m), 1361 (s), 1322 (s), 1269 (w), 1233 (w), 1142 (s), 966 (m), 850 (w), 748 (m), 699 (s)  $\text{cm}^{-1}$ . HRMS (ESI) calc. for  $\text{C}_{21}\text{H}_{28}\text{BO}_2$   $[\text{M}+\text{H}]^+$  323.2182, found 323.2184.  $[\alpha]_{\text{D}}^{20}$ : -7.34 (c = 1.10,  $\text{CHCl}_3$ ,  $l=50$  mm).

### Analysis of Stereochemistry:

The enantioselectivity was determined by SFC analysis of the reaction product. The analogous racemic material was prepared using RuPhos as the achiral ligand in the cross coupling reaction. The absolute stereochemistry was assigned by analogy.

Chiral SFC (OJ-H, Chiraldex, 2 mL/min, 2%  $^i\text{PrOH}$ , 100 bar, 35  $^\circ\text{C}$ )-analysis of the reaction product.

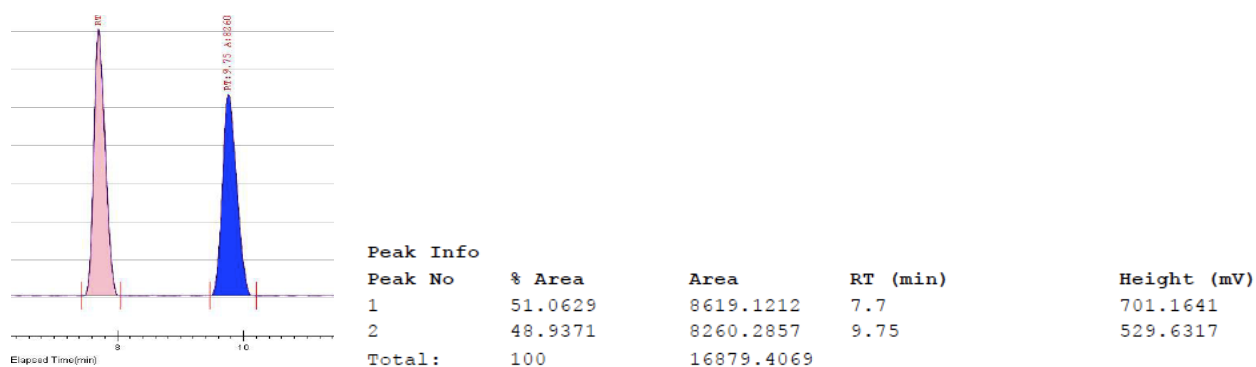

### Racemic

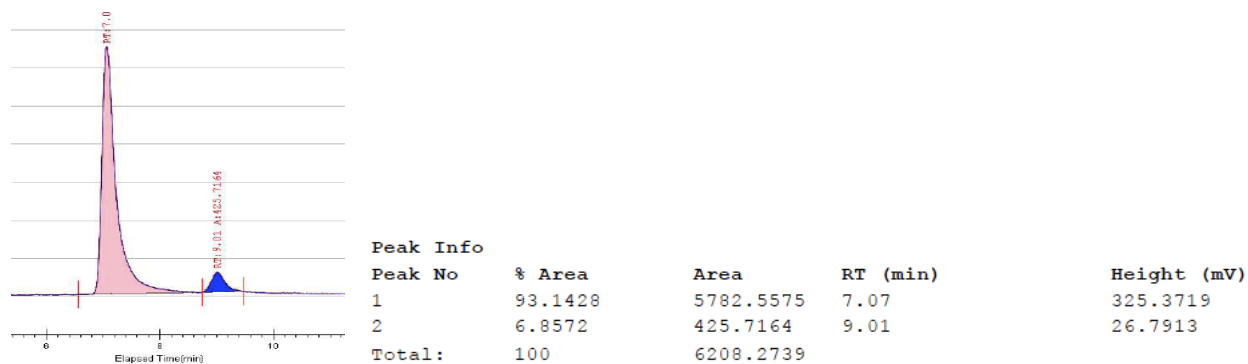

### Reaction product

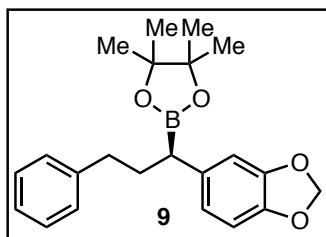

**(R)-2-(1-(benzo[*d*][1,3]dioxol-5-yl)-3-phenylpropyl)-4,4,5,5-tetramethyl-1,3,2-dioxaborolane (9).**

The reaction was performed according to *Representative Procedure (Method C)*. The crude reaction mixture was purified by column chromatography on SiO<sub>2</sub> (98:2 hexanes/diethyl ether, stain in CAM) to afford a colorless oil (32.0 mg, 88% yield). *R<sub>f</sub>* = 0.4 in 90:10 hexanes/ethyl acetate on TLC. <sup>1</sup>H NMR (500 MHz, CDCl<sub>3</sub>) δ 7.27-7.24 (m, 2H), 7.17-7.14 (m, 3H), 6.75 (d, *J* = 1.7 Hz, 1H), 6.72 (d, *J* = 7.9 Hz, 1H), 6.66 (dd, *J* = 8.0, 1.7 Hz, 1H), 5.92 (q, *J* = 1.6 Hz, 2H), 2.56 (ddd, *J* = 9.6, 6.3, 3.4 Hz, 2H), 2.28 (t, *J* = 7.9 Hz, 1H), 2.10 (ddt, *J* = 13.7, 9.3, 6.8 Hz, 1H), 1.92 (dtd, *J* = 13.5, 8.8, 6.6 Hz, 1H), 1.22 (s, 6H), 1.20 (s, 6H). <sup>13</sup>C NMR (125 MHz, CDCl<sub>3</sub>) δ 147.52, 145.18, 142.72, 128.46, 128.20, 125.60, 121.21, 108.82, 108.13, 83.33, 35.24, 34.65, 24.68, 24.59. <sup>11</sup>B NMR (128 MHz, CDCl<sub>3</sub>) δ 33.20. IR (neat) *v*<sub>max</sub> 3062 (w), 3025 (w), 2976 (m), 2927 (m), 1502 (m), 1486 (s), 1439 (m), 1370 (m), 1321 (s), 1241 (s), 1142 (s), 1039 (s), 967 (m), 938 (m), 859 (m), 809 (m), 749 (m), 699 (m) cm<sup>-1</sup>. HRMS (ESI) calc. for C<sub>22</sub>H<sub>28</sub>BO<sub>4</sub> [M+H]<sup>+</sup> 367.2081, found 367.2076. [α]<sub>D</sub><sup>20</sup>: -16.79 (c = 1.41, CHCl<sub>3</sub>, *l* = 50 mm).

***Analysis of Stereochemistry:***

The enantioselectivity was determined by SFC analysis of the corresponding alcohol after the oxidation. The analogous racemic material was prepared using RuPhos as the achiral ligand in the cross coupling reaction followed by oxidation. The absolute stereochemistry was assigned by analogy.

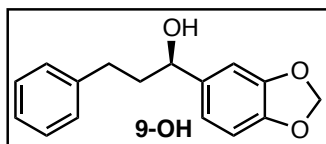

**(R)-1-(benzo[*d*][1,3]dioxol-5-yl)-3-phenylpropan-1-ol (9-OH).**

Prepared by oxidation of the boronate with NaOH/H<sub>2</sub>O<sub>2</sub> in THF. The crude reaction mixture was purified by column chromatography on SiO<sub>2</sub> (85:15 hexanes/ethyl acetate, stain in CAM) to afford a colorless oil. *R<sub>f</sub>* = 0.5 in 80:20 hexanes/ethyl acetate on TLC. <sup>1</sup>H NMR (500 MHz, CDCl<sub>3</sub>) 7.29-7.25 (m, 2H), 7.19-7.18 (m, 3H), 6.87 (s, 1H), 6.81-6.76 (m, 2H), 5.95 (t, *J* = 1.4 Hz, 2H), 4.60 (t, *J* = 6.4 Hz, 1H), 2.72 (ddd, *J* = 14.2, 8.9, 5.7 Hz, 1H), 2.64 (dd, *J* = 14.6, 7.9 Hz, 1H), 2.15-2.07 (m, 1H), 2.02-1.95 (m, 1H), 1.85-1.77 (br, 1H). <sup>13</sup>C NMR (125 MHz, CDCl<sub>3</sub>) δ 147.882, 146.98, 141.68, 138.61, 128.39, 128.36, 125.83, 119.36, 108.07, 106.37, 100.98, 73.73, 40.38, 32.05. IR (neat) *v*<sub>max</sub> 3395 (br),

3062 (w), 3026 (m), 2923 (m), 2857 (w), 2279 (w), 1051 (m), 1487 (s), 1442 (m), 1245 (s), 1187 (w), 1095 (w), 1039 (s), 934 (m), 865 (w), 812 (w), 699 (m)  $\text{cm}^{-1}$ . HRMS (ESI) calc. for  $\text{C}_{16}\text{H}_{16}\text{O}_3$   $[\text{M}+\text{H}]^+$  256.1099, found 256.1093.  $[\alpha]_D^{20}$ : 5.56 ( $c = 0.41$ ,  $\text{CHCl}_3$ ,  $l = 50$  mm).

**Analysis of Stereochemistry:**

The enantioselectivity was determined by SFC analysis of the reaction product. The absolute stereochemistry was assigned by analogy.

*Chiral SFC (OD-H, Chiraldex, 3 mL/min, 10%  $i$ PrOH, 100 bar, 35 °C)-analysis of the reaction product.*

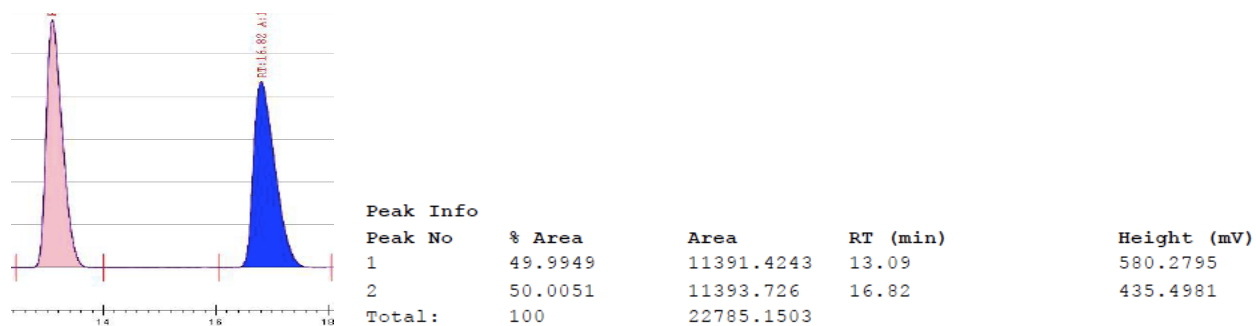

**Racemic**

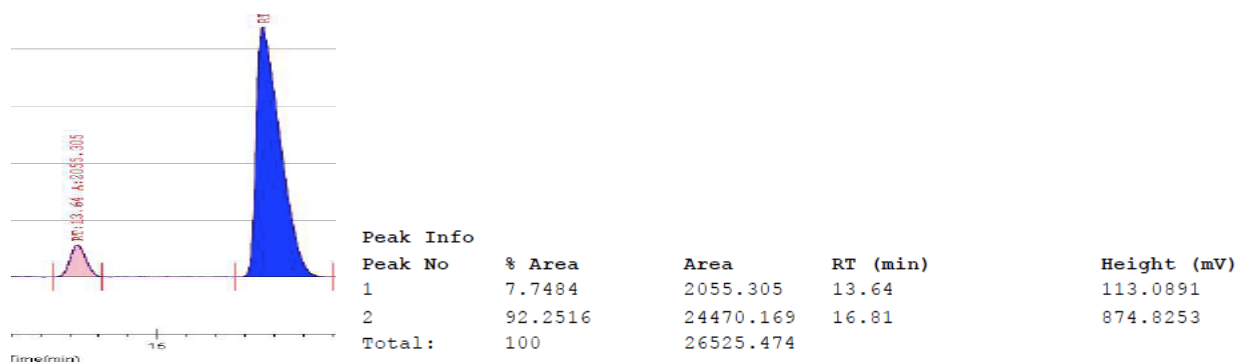

**Reaction product**



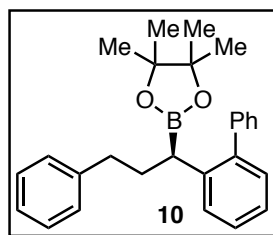

**(R)-2-(1-([1,1'-biphenyl]-2-yl)-3-phenylpropyl)-4,4,5,5-tetramethyl-1,3,2-dioxaborolane (10).** The reaction was performed according to *Representative Procedure (Method C)* with 6 hours at room temperature. The crude reaction mixture was purified by column chromatography on SiO<sub>2</sub> (80:20 hexanes/dichloromethane, stain in CAM) to afford a brown oil (21.0 mg, 53% yield).  $R_f = 0.4$  in 67:50 hexanes/dichloromethane on TLC. <sup>1</sup>H NMR (500 MHz, CDCl<sub>3</sub>)  $\delta$  7.43-7.39 (m, 1H), 7.37 (dd,  $J = 13.0, 6.2$  Hz, 2H), 7.33-7.29 (m, 4H), 7.23 (d,  $J = 2.3$  Hz, 4H), 7.12-7.09 (m, 1H), 6.99 (d,  $J = 0.5$  Hz, 2H), 2.61 (t,  $J = 7.8$  Hz, 1H), 2.41-2.31 (m, 2H), 2.09-2.02 (m, 1H), 1.93-1.86 (m, 1H), 1.23 (s, 6H), 1.20 (s, 6H). <sup>13</sup>C NMR (125 MHz, CDCl<sub>3</sub>)  $\delta$  142.66, 142.34, 142.12, 140.82, 129.96, 129.69, 128.28, 128.12, 128.08, 127.87, 127.34, 126.53, 125.42, 124.79, 83.19, 35.36, 35.33, 24.71, 24.64. <sup>11</sup>B NMR (128 MHz, CDCl<sub>3</sub>)  $\delta$  33.40. IR (neat)  $\nu_{\max}$  3059 (w), 3023 (w), 2977 (s), 2928 (m), 2858 (w), 1496 (m), 1478 (m), 1358 (s), 1320 (s), 1265 (m), 1232 (w), 1142 (s), 966 (w), 748 (s), 700 (s) cm<sup>-1</sup>. HRMS (ESI) calc. for C<sub>27</sub>H<sub>32</sub>BO<sub>2</sub> [M+H]<sup>+</sup> 399.2495, found 399.2498.  $[\alpha]_D^{20}$ : -7.86 (c = 0.85, CHCl<sub>3</sub>, l = 50 mm).

#### ***Analysis of Stereochemistry:***

The enantioselectivity was determined by SFC analysis of the reaction product. The analogous racemic material was prepared using RuPhos as the achiral ligand in the cross coupling reaction. The absolute stereochemistry was assigned by analogy.

*Chiral SFC (OJ-H, Chiraldex, 3 mL/min, 1% <sup>1</sup>PrOH, 100 bar, 35 °C)-analysis of the reaction product.*

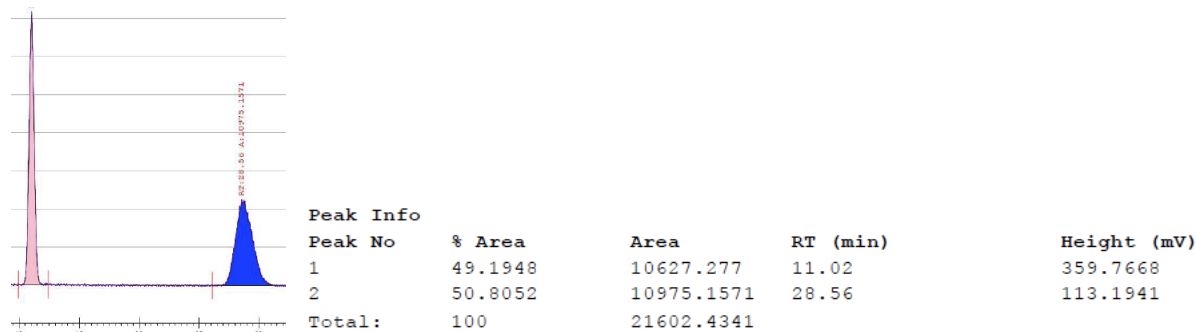

Racemic

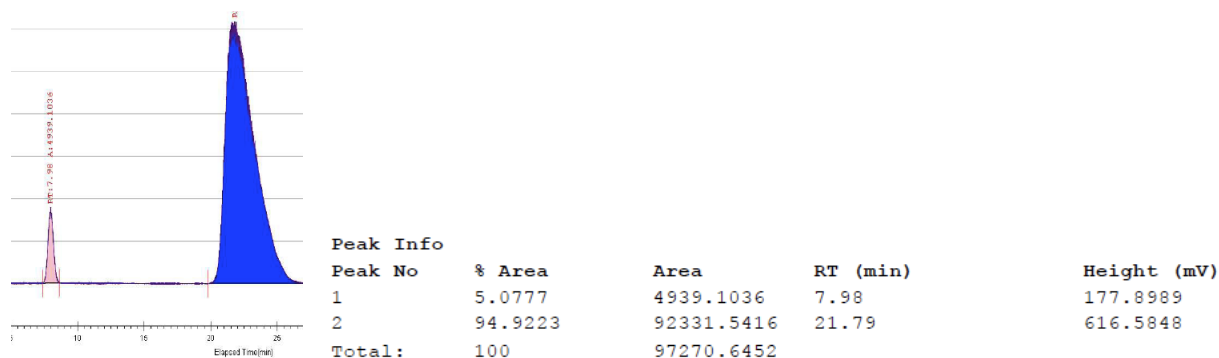

### Reaction product

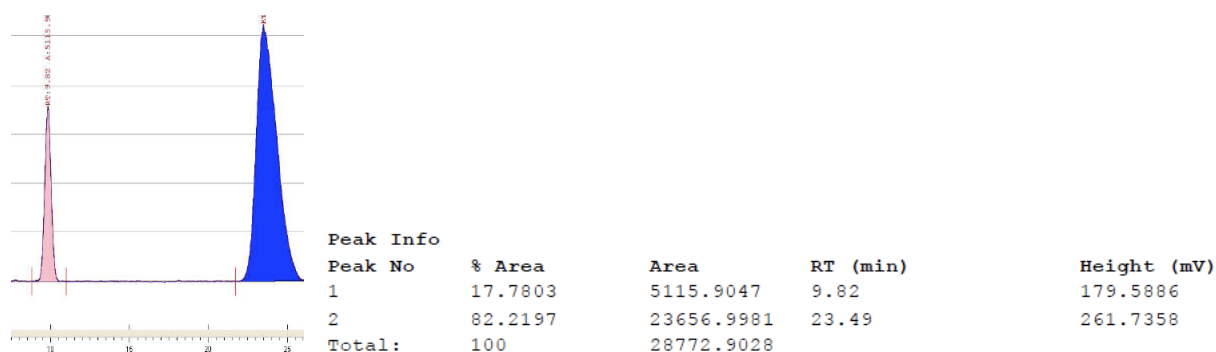

### Co-injection of racemic + reaction product

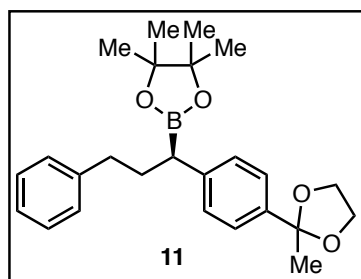

### **(R)-4,4,5,5-tetramethyl-2-(1-(4-(2-methyl-1,3-dioxolan-2-yl)phenyl)-3-phenylpropyl)-1,3,2-dioxaborolane (11).**

The reaction was performed according to *Representative Procedure (Method C)*. The crude reaction mixture was purified by column chromatography on SiO<sub>2</sub> (98:2 hexanes/diethyl ether, stain in CAM) to afford a colorless oil (29.0 mg, 72% yield). *R<sub>f</sub>* = 0.4 in 90:10 hexanes/ethyl acetate on TLC. <sup>1</sup>H NMR (500 MHz, CDCl<sub>3</sub>) 7.36 (d, *J* = 8.2 Hz, 2H), 7.27-7.24 (m, 2H), 7.19-7.14 (m, 5H), 4.04-4.01 (m, 1H), 3.84-3.76 (m, 1H), 2.57 (t, *J* = 8.0 Hz, 1H), 2.36 (t, *J* = 7.9 Hz, 1H), 2.15 (dq, *J* = 14.0, 7.3 Hz, 1H), 1.96 (dq, *J* = 14.0, 7.3 Hz, 1H), 1.65 (s, 3H), 1.22 (s, 6H), 1.20 (s, 6H). <sup>13</sup>C NMR (125 MHz, CDCl<sub>3</sub>) δ 142.65, 140.16, 128.59, 128.35, 128.28, 125.75, 125.37, 109.09, 83.49, 64.56, 35.57, 34.61, 29.84, 27.61, 24.83, 24.75. <sup>11</sup>B NMR (128 MHz, CDCl<sub>3</sub>) δ 33.40. IR (neat) *v*<sub>max</sub> 3025 (w), 2977 (m), 2930 (m), 2887 (w), 1603(w), 1506 (w), 1454 (w), 1370 (s), 1321 (s), 1262 (m), 1197 (m), 1140 (s), 1095 (m), 1037 (s), 966 (w), 849 (s), 751 (m), 698 (m), 672 (s), 579 (w) cm<sup>-1</sup>. HRMS (ESI) calc. for C<sub>25</sub>H<sub>34</sub>BO<sub>4</sub> [M+H]<sup>+</sup> 409.2550, found 409.2561. [α]<sub>D</sub><sup>20</sup>: 16.54 (c = 0.82, CHCl<sub>3</sub>, *l* = 50 mm).

### Analysis of Stereochemistry:

The enantioselectivity was determined by SFC analysis of the reaction product. The analogous racemic material was prepared using RuPhos as the achiral ligand in the cross coupling reaction. The absolute stereochemistry was assigned by analogy.

*Chiral SFC (OJ-H, Chiraldex, 3 mL/min, 2% <sup>i</sup>PrOH, 100 bar, 35 °C)-analysis of the reaction product.*

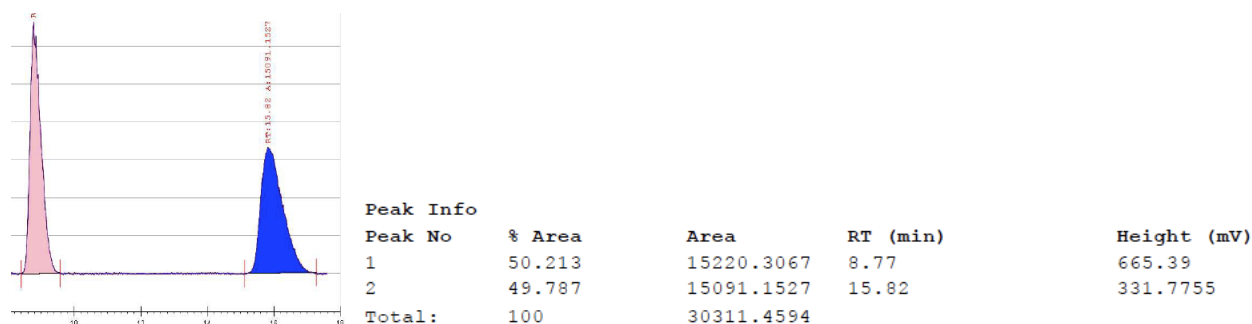

### Racemic

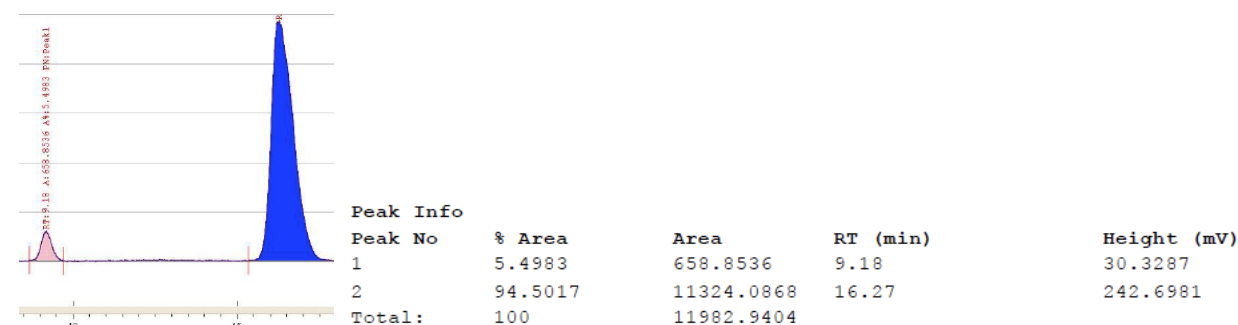

### Reaction product

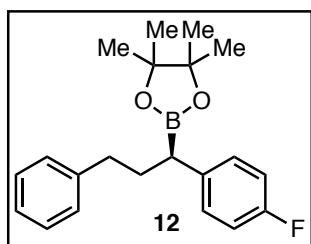

**(R)-2-(1-(4-fluorophenyl)-3-phenylpropyl)-4,4,5,5-tetramethyl-1,3,2-dioxaborolane (12).** The reaction was performed according to *Representative Procedure (Method C)*. The crude reaction mixture was purified by column chromatography on SiO<sub>2</sub> (99:1 hexanes/diethyl ether, stain in CAM) to afford a colorless oil (27.9 mg, 82% yield). *R<sub>f</sub>* = 0.4 in 95:5 hexanes/ethyl acetate on TLC. <sup>1</sup>H NMR (500 MHz, CDCl<sub>3</sub>) 7.28-7.24 (m, 2H), 7.19-7.13 (m, 5H), 6.98-6.94 (m, 2H), 2.56 (t, *J* = 7.9 Hz, 2H), 2.34 (t, *J* = 7.9 Hz, 1H), 2.18-2.11 (m, 1H), 1.98-1.91 (m, 1H), 1.22 (s, 6H), 1.20 (s, 6H). <sup>13</sup>C NMR (125 MHz,

$\text{CDCl}_3$ )  $\delta$  161.92, 160.00, 142.34, 138.50 (d,  $J_{F-C} = 2.91$  Hz), 129.60 (d,  $J_{F-C} = 7.66$  Hz), 128.30 (d,  $J_{F-C} = 25.96$  Hz), 125.67, 115.00 (d,  $J_{F-C} = 20.97$  Hz), 83.39, 35.27, 34.44, 24.66, 24.56.  $^{11}\text{B}$  NMR (128 MHz,  $\text{CDCl}_3$ )  $\delta$  33.46. IR (neat)  $\nu_{\text{max}}$  3026 (w), 2977 (m), 2929 (m), 2859 (w), 1602 (m), 1506 (s), 1454 (w), 1359 (s), 1321 (s), 1268 (m), 1218 (s), 1139 (s), 1107 (w), 966 (m), 849 (m), 831 (m), 748 (m), 698 (s), 512 (m)  $\text{cm}^{-1}$ . HRMS (ESI) calc. for  $\text{C}_{21}\text{H}_{27}\text{BFO}_2$   $[\text{M}+\text{H}]^+$  341.2088, found 341.2102.  $[\alpha]_{\text{D}}^{20}$ : -11.15 (c = 0.95,  $\text{CHCl}_3$ ,  $l=50$  mm).

#### **Analysis of Stereochemistry:**

The enantioselectivity was determined by SFC analysis of the corresponding alcohol after the oxidation. The analogous racemic material was prepared using RuPhos as the achiral ligand in the cross coupling reaction followed by oxidation. The absolute stereochemistry was assigned by analogy.

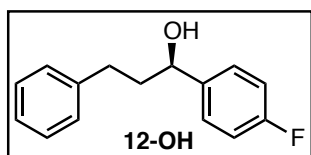

**(R)-1-(4-fluorophenyl)-3-phenylpropan-1-ol (12-OH).** Prepared by oxidation of the boronate with  $\text{NaOH}/\text{H}_2\text{O}_2$  in THF. The crude reaction mixture was purified by column chromatography on  $\text{SiO}_2$  (85:15 hexanes/ethyl acetate, stain in CAM) to afford a colorless oil.  $R_f = 0.5$  in 80:20 hexanes/ethyl acetate on TLC.  $^1\text{H}$  NMR (500 MHz,  $\text{CDCl}_3$ ) 7.34-7.26 (m, 4H), 7.21-7.18 (m, 3H), 7.06-7.02 (m, 2H), 4.68 (dt,  $J = 8.8, 3.9$  Hz, 1H), 2.74 (ddd,  $J = 14.3, 9.3, 5.4$  Hz, 1H), 2.66 (ddd,  $J = 14.4, 8.9, 6.0$  Hz, 1H), 2.16-2.09 (m, 1H), 2.04-1.97 (m, 1H), 1.85 (s, 1H).  $^{13}\text{C}$  NMR (125 MHz,  $\text{CDCl}_3$ )  $\delta$  163.17, 161.22, 141.54, 140.27 (d,  $J_{F-C} = 3.6$  Hz), 128.40 (d,  $J_{F-C} = 2.9$  Hz), 127.53 (d,  $J_{F-C} = 8.0$  Hz), 125.92, 115.31 (d,  $J_{F-C} = 21.4$  Hz), 73.20, 40.55, 31.99. IR (neat)  $\nu_{\text{max}}$  3368 (br), 3084 (w), 3062 (w), 3027 (w), 2926 (w), 2860 (w), 2858 (w), 1603 (m), 1508 (s), 1454 (w), 1222 (s), 1156 (w), 1097 (m), 1061 (w), 1031 (w), 924 (w), 836 (w), 776 (m), 750 (w), 699 (m)  $\text{cm}^{-1}$ . HRMS (ESI) calc. for  $\text{C}_{15}\text{H}_{14}\text{F}$   $[\text{M}+\text{H}-\text{H}_2\text{O}]^+$  213.1080, found 213.1079.  $[\alpha]_{\text{D}}^{20}$ : 18.10 (c = 0.74,  $\text{CHCl}_3$ ,  $l=50$  mm).

#### **Analysis of Stereochemistry:**

The enantioselectivity was determined by SFC analysis of the reaction product. The absolute stereochemistry was assigned by analogy.

Chiral SFC (AD-H, Chiraldex, 3 mL/min, 6% *i*PrOH, 100 bar, 35 °C)-analysis of the reaction product.

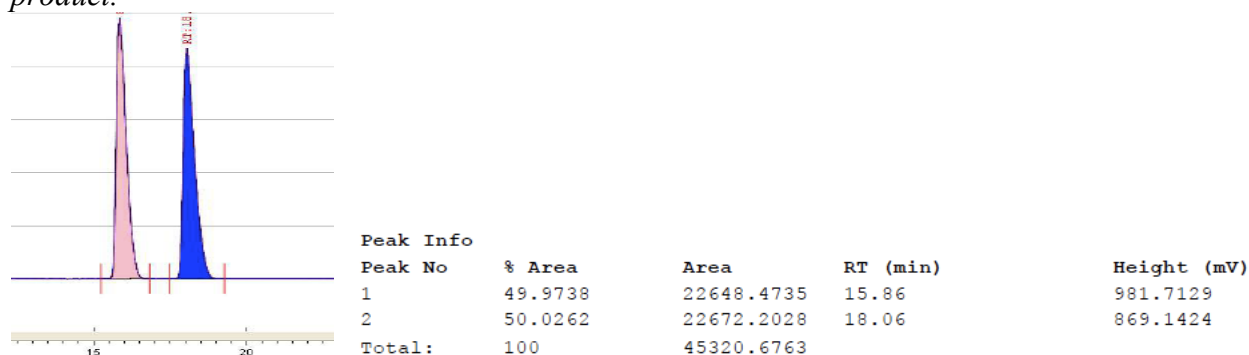

Racemic

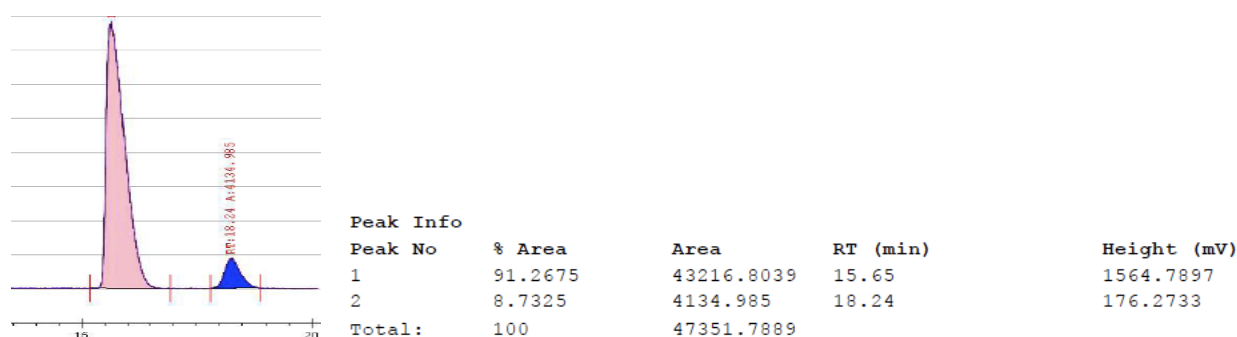

Reaction product

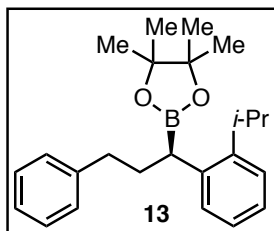

**(R)-2-(1-(2-isopropylphenyl)-3-phenylpropyl)-4,4,5,5-tetramethyl-1,3,2-dioxaborolane (13).** The reaction was performed according to *Representative Procedure (Method D)*. The crude reaction mixture was purified by column chromatography on SiO<sub>2</sub> (99:1 hexanes/diethyl ether, stain in CAM) to afford a brown oil (39.2 mg, 53% yield). *R<sub>f</sub>* = 0.4 in 95:5 hexanes/ethyl acetate on TLC. <sup>1</sup>H NMR (500 MHz, CDCl<sub>3</sub>) δ 7.28-7.24 (m, 4H), 7.18-7.11 (m, 5H), 3.13 (dt, *J* = 13.6, 6.8 Hz, 1H), 2.68-2.55 (m, 3H), 2.23 (ddd, *J* = 13.5, 9.7, 7.8 Hz, 1H), 1.95 (ddd, *J* = 13.5, 10.0, 7.4 Hz, 1H), 1.23 (s, 6H), 1.21 (s, 3H), 1.20 (s, 3H), 1.19 (s, 6H). <sup>13</sup>C NMR (125 MHz, CDCl<sub>3</sub>) δ 146.49, 142.60, 139.90, 128.46, 128.31, 128.18, 125.59, 125.49, 125.37, 125.13, 83.21, 35.59, 34.64, 28.70, 24.69, 24.65, 24.25, 23.70. <sup>11</sup>B NMR (128 MHz, CDCl<sub>3</sub>) δ 33.42. IR (neat) *v*<sub>max</sub> 3061 (w), 3025 (w), 2974 (s), 2928 (m), 2865 (w), 1487 (m), 1453 (m), 1369 (s), 1320 (s), 1265 (m), 1267 (w), 1214 (w), 1106 (s), 966 (m), 850 (m), 748 (s), 700 (s) cm<sup>-1</sup>. HRMS (ESI) calc. for C<sub>24</sub>H<sub>34</sub>BO<sub>2</sub> [M+H]<sup>+</sup> 365.2652, found 365.2642. [α]<sub>D</sub><sup>20</sup>: -5.58 (c = 1.84, CHCl<sub>3</sub>, *l* = 50 mm).

### Analysis of Stereochemistry:

The enantioselectivity was determined by SFC analysis of the reaction product. The analogous racemic material was prepared using RuPhos as the achiral ligand in the cross coupling reaction. The absolute stereochemistry was assigned by analogy.

*Chiral SFC (OD-H, Chiraldex, 3 mL/min, 1% <sup>i</sup>PrOH, 100 bar, 35 °C)-analysis of the reaction product.*

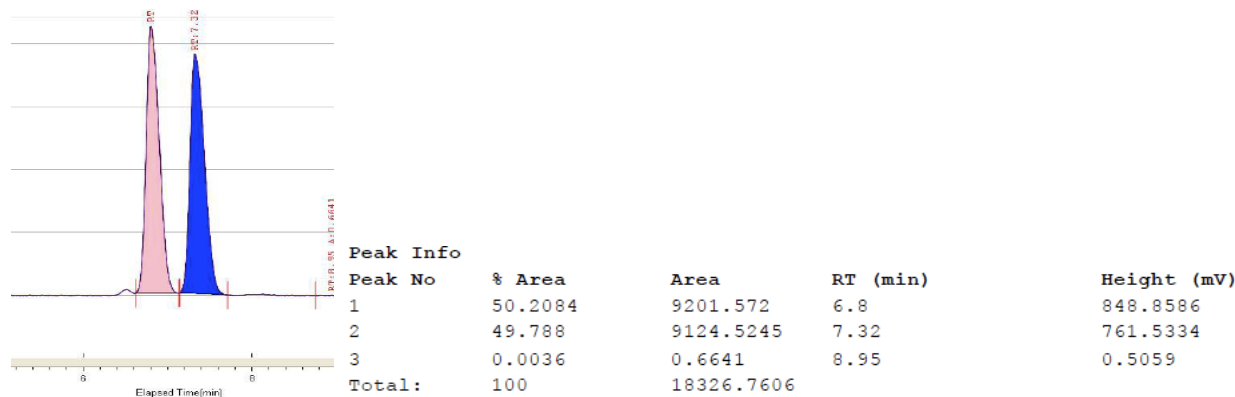

### Racemic

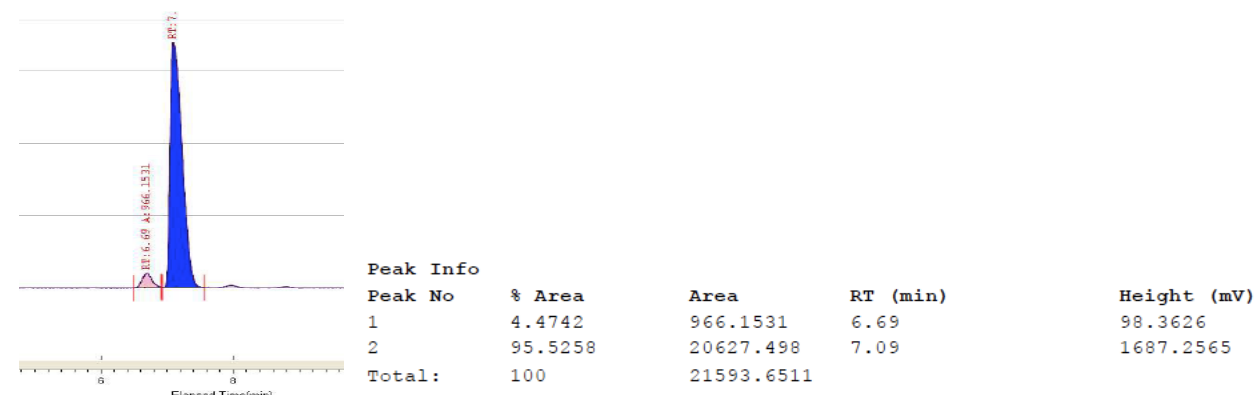

### Reaction product

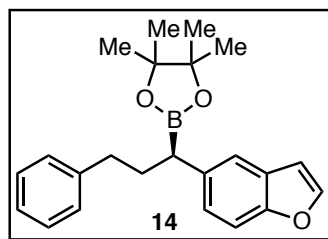

**(R)-2-(1-(benzofuran-5-yl)-3-phenylpropyl)-4,4,5,5-tetramethyl-1,3,2-dioxaborolane (14).** The reaction was performed according to *Representative Procedure (Method D)*. The crude reaction mixture was purified by column chromatography on SiO<sub>2</sub> (98:2 hexanes/diethyl ether, stain in CAM) to afford a brown oil (29.6 mg, 82% yield).

$R_f = 0.4$  in 90:10 hexanes/ethyl acetate on TLC. <sup>1</sup>H NMR (500 MHz, CDCl<sub>3</sub>) 7.58 (d,  $J = 2.2$  Hz, 1H), 7.44 (d,  $J = 1.7$  Hz, 1H), 7.40 (d,  $J = 8.5$  Hz, 1H), 7.28-7.24 (m, 2H), 7.18-7.15

(m, 4H), 6.71 (dd,  $J = 2.2, 0.9$  Hz, 1H), 2.58 (t,  $J = 8.0$  Hz, 1H), 2.45 (t,  $J = 7.9$  Hz, ), 2.20 (dq,  $J = 13.4, 7.9$  Hz, 1H), 2.02 (dq,  $J = 13.4, 8.0$  Hz, 1H), 1.22 (s, 6H), 1.95 (s, 6H).  $^{13}\text{C}$  NMR (125 MHz,  $\text{CDCl}_3$ )  $\delta$  153.36, 144.77, 142.58, 137.27, 128.47, 128.19, 127.54, 125.58, 124.93, 120.42, 110.99, 106.49, 83.31, 35.37, 34.86, 24.67, 24.58.  $^{11}\text{B}$  NMR (128 MHz,  $\text{CDCl}_3$ )  $\delta$  33.40. IR (neat)  $\nu_{\text{max}}$  3061 (w), 3025 (w), 2977 (m), 2929 (m), 2859 (w), 1495 (m), 1465 (w), 1362 (s), 1321 (s), 1261 (w), 1142 (s), 1109 (w), 1031 (w), 967 (w), 874 (w), 849 (w), 812 (w), 748 (w), 767 (w), 739 (w), 699 (w)  $\text{cm}^{-1}$ . HRMS (ESI) calc. for  $\text{C}_{23}\text{H}_{28}\text{BO}_3$   $[\text{M}+\text{H}]^+$  363.2132, found 363.2117.  $[\alpha]_{\text{D}}^{20}$ : -12.89 ( $c = 0.85$ ,  $\text{CHCl}_3$ ,  $l = 50$  mm).

### Analysis of Stereochemistry:

The enantioselectivity was determined by SFC analysis of the reaction product. The analogous racemic material was prepared using RuPhos as the achiral ligand in the cross coupling reaction. The absolute stereochemistry was assigned by analogy.

*Chiral SFC (OJ-H, Chiraldex, 3 mL/min, 2%  $i$ PrOH, 100 bar, 35 °C)-analysis of the reaction product.*

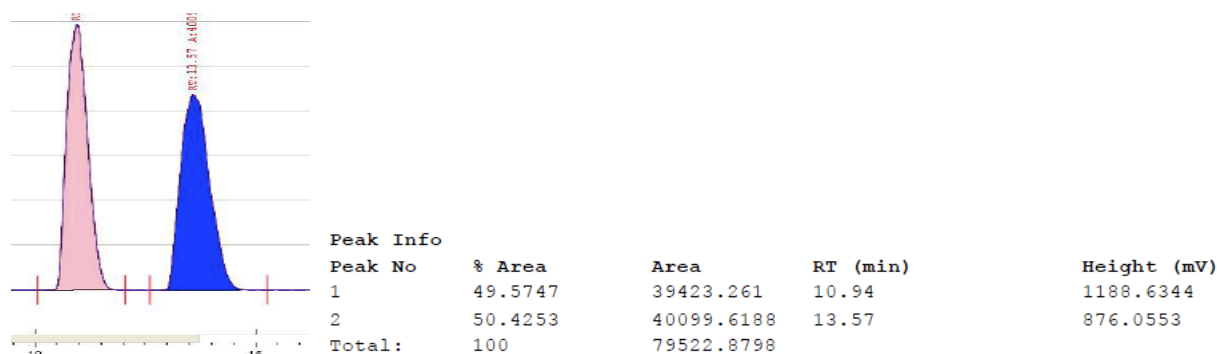

### Racemic

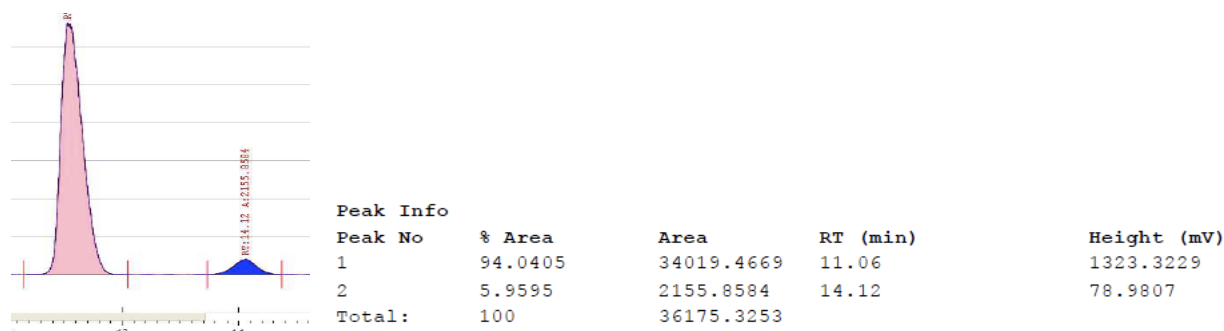

### Reaction product

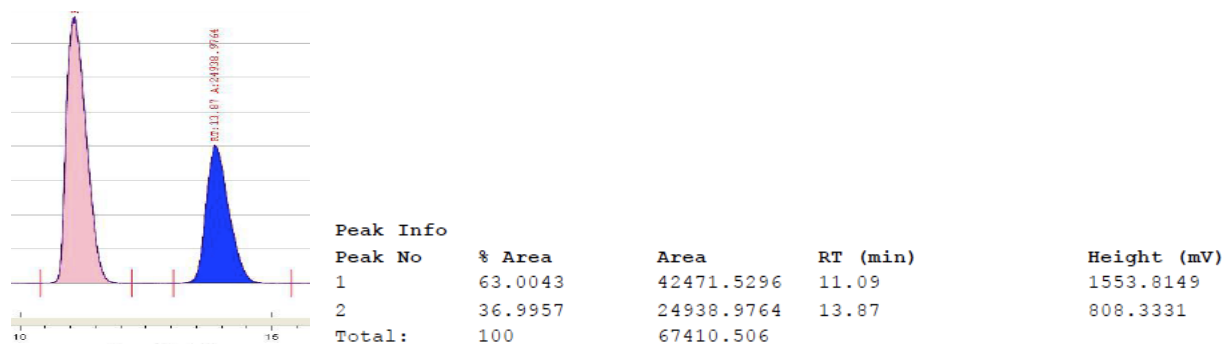

Co-injection of racemic + reaction product

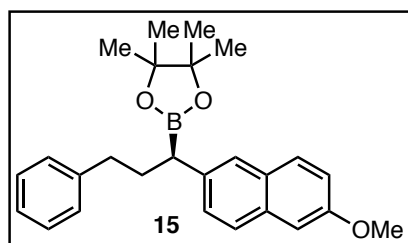

**(R)-2-(1-(6-methoxynaphthalen-2-yl)-3-phenylpropyl)-4,4,5,5-tetramethyl-1,3,2-dioxaborolane (15).** The reaction was performed according to *Representative Procedure (Method D)*. The crude reaction mixture was purified by column chromatography on SiO<sub>2</sub> (98:2 hexanes/diethyl ether,

stain in CAM) to afford a colorless oil (37.9mg, 92% yield).  $R_f = 0.4$  in 90:10 hexanes/ethyl acetate on TLC. <sup>1</sup>H NMR (500 MHz, CDCl<sub>3</sub>) 7.67 (dd,  $J = 8.1, 4.7$  Hz, 2H), 7.59 (s, 1H), 7.37 (d,  $J = 8.5$  Hz, 1H), 7.28-7.25 (m, 2H), 7.18-7.15 (m, 3H), 7.13-7.11 (m, 2H), 3.91 (s, 3H), 2.60 (t,  $J = 7.8$  Hz, 2H), 2.50 (t,  $J = 7.8$  Hz, 1H), 2.29-2.21 (m, 1H), 2.12-2.04 (m, 1H), 1.22 (s, 6H), 1.19 (s, 6H). <sup>13</sup>C NMR (125 MHz, CDCl<sub>3</sub>)  $\delta$  156.97, 142.56, 138.08, 132.72, 129.31, 128.94, 128.49, 128.21, 127.87, 126.67, 126.24, 125.60, 118.40, 105.61, 83.35, 55.28, 35.42, 34.20, 24.68, 24.59. <sup>11</sup>B NMR (128 MHz, CDCl<sub>3</sub>)  $\delta$  33.48. IR (neat)  $\nu_{\max}$  3058 (w), 3024 (w), 2976 (m), 2933 (m), 2858 (w), 1633 (m), 1604 (s), 1503 (w), 1481 (w), 1454 (w), 1358 (s), 1322 (s), 1265 (s), 1224 (s), 1141 (s), 1032 (m), 967 (m), 852 (m), 698 (m) cm<sup>-1</sup>. HRMS (ESI) calc. for C<sub>26</sub>H<sub>32</sub>BO<sub>3</sub> [M+H]<sup>+</sup> 403.2445, found 403.2441.  $[\alpha]_D^{20}$ : -13.86 ( $c = 1.00$ , CHCl<sub>3</sub>,  $l = 50$  mm).

#### ***Analysis of Stereochemistry:***

The enantioselectivity was determined by SFC analysis of the reaction product. The analogous racemic material was prepared using RuPhos as the achiral ligand in the cross coupling reaction. The absolute stereochemistry was assigned by analogy.



Chiral SFC (OD-H, Chiraldex, 3 mL/min, 2% *i*PrOH, 100 bar, 35 °C)-analysis of the reaction product.

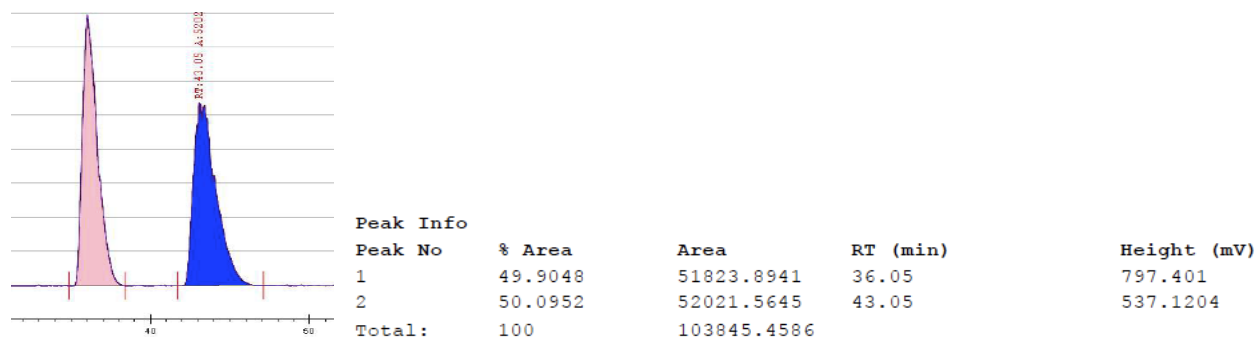

Racemic

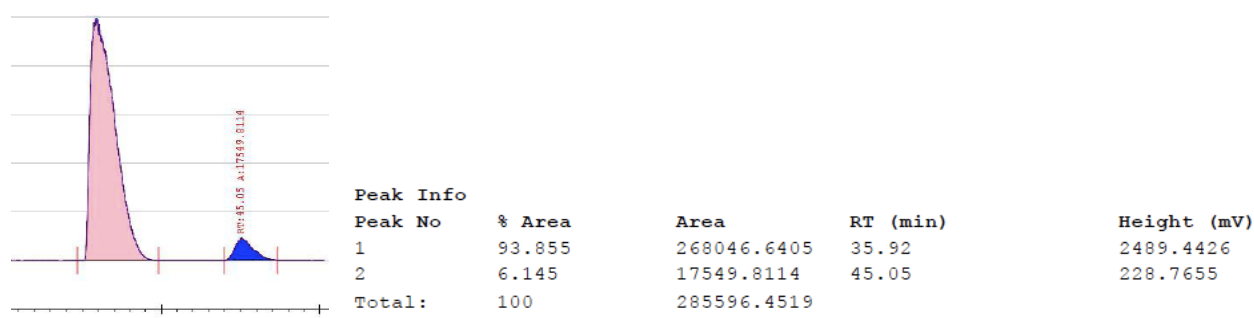

Reaction product

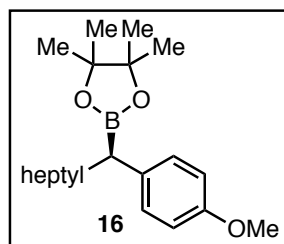

**(R)-2-(1-(4-methoxyphenyl)octyl)-4,4,5,5-tetramethyl-1,3,2-dioxaborolane (16).** The reaction was performed according to *Representative Procedure (Method C)*. The crude reaction mixture was flashed slowly by column chromatography on SiO<sub>2</sub> (2:1 hexanes/dichloromethane, stain in CAM) to afford a brown oil (26.8 mg,

78% yield).  $R_f = 0.4$  in 2:1 hexanes/dichloromethane on TLC. <sup>1</sup>H NMR (500 MHz, CDCl<sub>3</sub>) 7.13-7.10 (m, 2H), 6.81-6.78 (m, 2H), 3.77 (s, 3H), 2.23 (t,  $J = 7.9$  Hz, 1H), 1.83-1.77 (m, 1H), 1.62-1.56 (m, 1H), 1.29-1.24 (m, 10H), 1.20 (s, 6H), 1.19 (s, 6H), 0.86 (t,  $J = 7.0$  Hz, 3H). <sup>13</sup>C NMR (125 MHz, CDCl<sub>3</sub>)  $\delta$  157.20, 135.49, 129.14, 113.64, 83.11, 55.13, 32.85, 31.83, 29.56, 29.19, 24.62, 24.57, 22.63, 14.07. <sup>11</sup>B NMR (128 MHz, CDCl<sub>3</sub>)  $\delta$  33.53. IR (neat)  $\nu_{\max}$  2976 (w), 2954 (w), 2023 (m), 2853 (m), 1508 (s), 1463 (m), 1359 (s), 1319 (s), 1243 (s), 1141 (s), 1038 (m), 966 (m), 850 (m), 827 (m), 530 (w) cm<sup>-1</sup>. HRMS (ESI) calc. for C<sub>21</sub>H<sub>36</sub>BO<sub>3</sub> [M+H]<sup>+</sup> 347.2758, found 347.2756.  $[\alpha]_D^{20}$ : -13.71 (c = 1.15, CHCl<sub>3</sub>,  $l = 50$  mm).

### Analysis of Stereochemistry:

The enantioselectivity was determined by SFC analysis of the corresponding alcohol after the oxidation. The analogous racemic material was prepared using RuPhos as the achiral ligand in the cross coupling reaction followed by oxidation. The absolute stereochemistry was assigned by analogy.

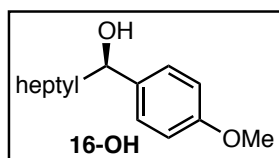

**(R)-1-(4-methoxyphenyl)octan-1-ol (16-OH).** Prepared by oxidation of the boronate with NaOH/H<sub>2</sub>O<sub>2</sub> in THF. The crude reaction mixture was purified by column chromatography on SiO<sub>2</sub> (90:10 hexanes/ethyl acetate, stain in CAM) to afford a colorless solid. <sup>1</sup>H NMR (500 MHz, CDCl<sub>3</sub>) 7.28-7.25 (m, 2H), 6.90-6.87 (m, 2H), 4.61 (t, *J* = 6.7 Hz, 1H), 3.81 (s, 3H), 1.83-1.76 (m, 1H), 1.71 (s, 1H), 1.71-1.64 (m, 1H), 1.43-1.36 (m, 1H), 1.31-1.21 (m, 9H), 0.87 (t, *J* = 7.0 Hz, 3H). <sup>13</sup>C NMR (125 MHz, CDCl<sub>3</sub>) δ 158.97, 137.09, 127.11, 113.77, 74.28, 55.25, 38.98, 31.74, 29.47, 25.88, 22.61, 14.05. IR (neat)  $\nu_{\max}$  3363 (br), 2953 (m), 2925 (s), 2854 (m), 1611 (m), 1585 (w), 1512 (s), 1464 (m), 1441 (w), 1301 (w), 1246 (s), 1174 (m), 1037 (w), 830 (m), 809 (w) cm<sup>-1</sup>. HRMS (ESI) calc. for C<sub>15</sub>H<sub>23</sub>O<sub>1</sub> [M+H-H<sub>2</sub>O]<sup>+</sup> 219.1749, found 219.1755. [ $\alpha$ ]<sub>D</sub><sup>20</sup>: 18.13 (c = 0.81, CHCl<sub>3</sub>, *l* = 50 mm).

### Analysis of Stereochemistry:

The enantioselectivity was determined by SFC analysis of the corresponding alcohol after the oxidation. The absolute stereochemistry was assigned by analogy.

*Chiral SFC (OJ-H, Chiraldex, 2 mL/min, 3% <sup>1</sup>PrOH, 100 bar, 35 °C)-analysis of the reaction product.*

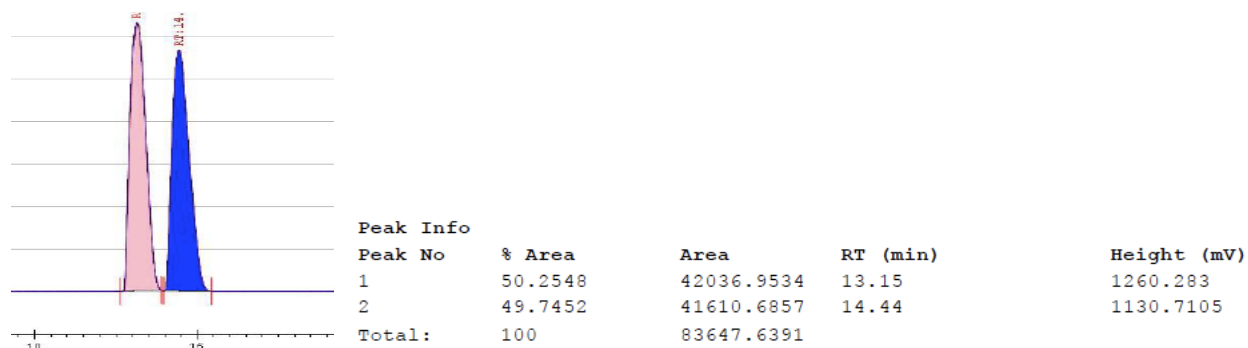

## Racemic

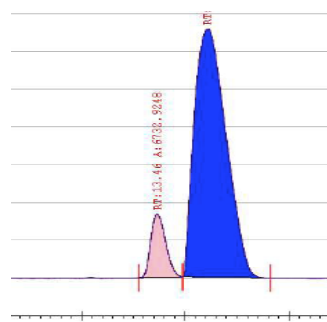

| Peak No | % Area | Area       | RT (min) | Height (mV) |
|---------|--------|------------|----------|-------------|
| 1       | 10.762 | 6732.9248  | 13.46    | 336.3644    |
| 2       | 89.238 | 55829.1037 | 14.43    | 1313.5301   |
| Total:  | 100    | 62562.0285 |          |             |

## Reaction product

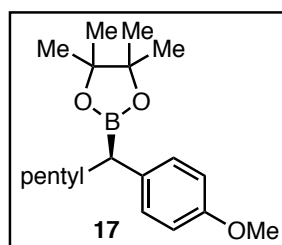

**(R)-2-(1-(4-methoxyphenyl)hexyl)-4,4,5,5-tetramethyl-1,3,2-dioxaborolane (17).** The reaction was performed according to *Representative Procedure (Method C)*. The crude reaction mixture was flashed slowly by column chromatography on SiO<sub>2</sub> (1:1 hexanes/dichloromethane, stain in CAM) to afford a brown oil (19.9 mg,

81% yield).  $R_f = 0.4$  in 90:10 hexanes/ethyl acetate on TLC. <sup>1</sup>H NMR (500 MHz, CDCl<sub>3</sub>) 7.13-7.10 (m, 2H), 6.81-6.79 (m, 2H), 3.77 (s, 3H), 2.23 (t,  $J = 7.9$  Hz, 1H), 1.81-1.76 (m, 1H), 1.62-1.55 (m, 1H), 1.29-1.23 (m,  $J = 7.1$  Hz, 6H), 1.21 (s, 6H), 1.19 (s, 6H), 0.85 (t,  $J = 6.7$  Hz, 3H). <sup>13</sup>C NMR (125 MHz, CDCl<sub>3</sub>)  $\delta$  157.20, 135.48, 129.14, 113.64, 83.11, 55.13, 32.80, 31.81, 28.88, 24.62, 24.56, 22.53, 14.02. <sup>11</sup>B NMR (128 MHz, CDCl<sub>3</sub>)  $\delta$  33.54. IR (neat)  $\nu_{\max}$  3032 (w), 2976 (w), 2955 (w), 2926 (m), 2855 (w), 1609 (w), 1509 (s), 1464 (m), 1360 (s), 1320 (s), 1244 (s), 1142 (s), 1038 (m), 1140 (s), 967 (w), 851 (m), 808 (m) cm<sup>-1</sup>. HRMS (ESI) calc. for C<sub>19</sub>H<sub>32</sub>BO<sub>3</sub> [M+H]<sup>+</sup> 319.2445, found 319.2437.  $[\alpha]_D^{20}$ : -15.18 (c = 0.93, CHCl<sub>3</sub>,  $l = 50$  mm).

**Analysis of Stereochemistry:**

The enantioselectivity was determined by SFC analysis of the corresponding alcohol after the oxidation. The analogous racemic material was prepared using RuPhos as the achiral ligand in the cross coupling reaction followed by oxidation. The absolute stereochemistry was assigned by analogy.

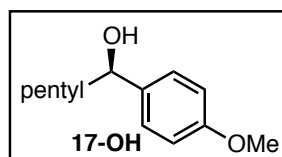

**(R)-1-(4-methoxyphenyl)hexyl-1-ol (17-OH).** Prepared by oxidation of the boronate with NaOH/H<sub>2</sub>O<sub>2</sub> in THF. The crude reaction mixture was purified by column chromatography on SiO<sub>2</sub> (90:10 hexanes/ethyl

acetate, stain in CAM) to afford a colorless solid.  $^1\text{H}$  NMR (500 MHz,  $\text{CDCl}_3$ ) 7.28-7.25 (m, 2H), 6.89-6.87 (m, 2H), 4.61 (t,  $J = 6.7$  Hz, 1H), 3.80 (s, 3H), 1.82-1.77 (m, 1H), 1.71-1.64 (m, 1H), 1.43-1.34 (m, 1H), 1.34-1.21 (m, 5H), 0.87 (t,  $J = 7.1$  Hz, 3H).  $^{13}\text{C}$  NMR (125 MHz,  $\text{CDCl}_3$ )  $\delta$  159.12, 137.24, 127.26, 113.92, 74.43, 55.40, 39.10, 31.87, 25.71, 22.71, 14.15. IR (neat)  $\nu_{\text{max}}$  3363 (br), 2953 (m), 2925 (s), 2854 (m), 1611 (m), 1585 (w), 1512 (s), 1464 (m), 1441 (w), 1301 (w), 1246 (s), 1174 (m), 1037 (w), 830 (m), 809 (w)  $\text{cm}^{-1}$ . HRMS (ESI) calc. for  $\text{C}_{13}\text{H}_{19}\text{O}_1$   $[\text{M}+\text{H}-\text{H}_2\text{O}]^+$  191.1436, found 191.1438.  $[\alpha]_{\text{D}}^{20}$ : 18.88 ( $c = 0.38$ ,  $\text{CHCl}_3$ ,  $l = 50$  mm).

### Analysis of Stereochemistry:

The enantioselectivity was determined by SFC analysis of the reaction product. The absolute stereochemistry was assigned by analogy.

*Chiral SFC (OJ-H, Chiraldex, 2 mL/min, 3%  $i$ PrOH, 100 bar, 35  $^\circ\text{C}$ )-analysis of the reaction product.*

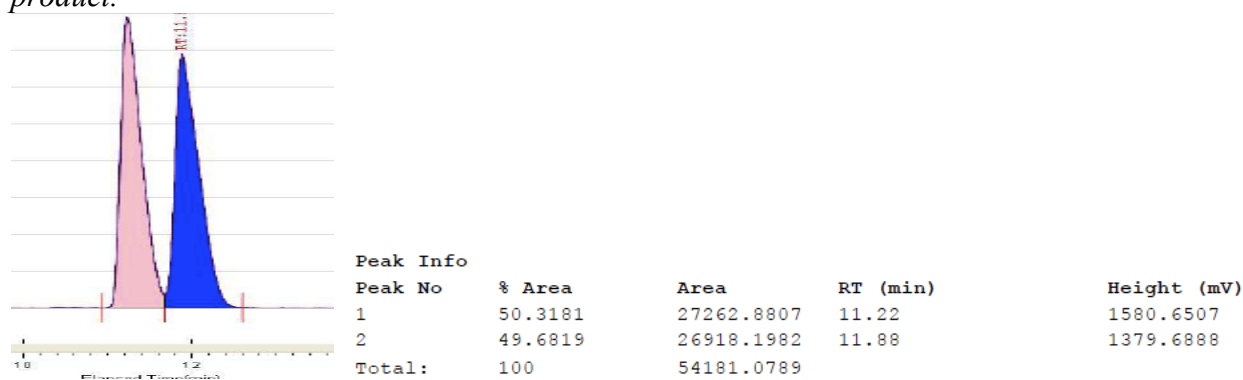

### Racemic

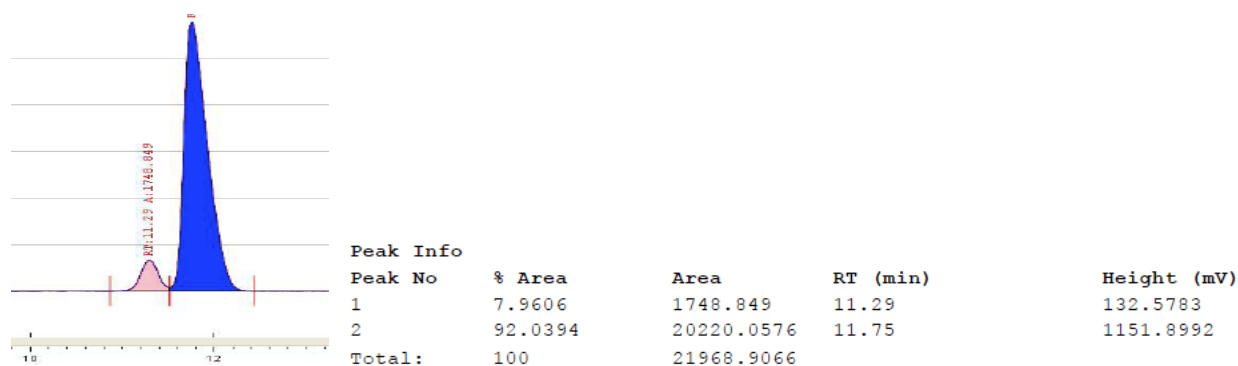

### Reaction product

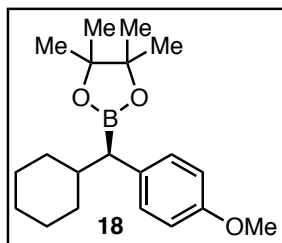

**(R)-2-(cyclohexyl(4-methoxyphenyl)methyl)-4,4,5,5-tetramethyl-1,3,2-dioxaborolane (18).** The reaction was performed according to *Representative Procedure (Method C)* with 48 hours at room temperature. The crude reaction mixture was purified by column chromatography on SiO<sub>2</sub> (60:40 hexanes/dichloromethane, stain in CAM) to afford a colorless oil (14.0 mg, 43% yield).  $R_f = 0.5$  in 50:50 hexanes/dichloromethane on TLC. <sup>1</sup>H NMR (500 MHz, CDCl<sub>3</sub>)  $\delta$  7.12-7.09 (m, 2H), 6.80-6.77 (m, 2H), 3.77 (s, 3H), 1.98 (d,  $J = 10.3$  Hz, 1H), 1.82-1.79 (m, 1H), 1.76-1.68 (m, 2H), 1.62-1.56 (m, 2H), 1.48-1.45 (m, 1H), 1.35-1.24 (m, 1H), 1.19 (s, 6H), 1.17 (s, 6H), 1.11 (td,  $J = 10.0, 2.0$  Hz, 2H), 1.07-0.97 (m, 1H), 0.70 (qd,  $J = 12.0, 3.2$  Hz, 1H). <sup>13</sup>C NMR (125 MHz, CDCl<sub>3</sub>)  $\delta$  157.26, 133.65, 129.98, 113.44, 83.05, 55.10, 40.39, 33.72, 32.38, 26.61, 26.54, 24.66, 24.53. <sup>11</sup>B NMR (128 MHz, CDCl<sub>3</sub>)  $\delta$  33.20. IR (neat)  $\nu_{\max}$  2976 (w), 2922 (s), 2850 (w), 1508 (s), 1447 (w), 1354 (m), 1319 (m), 1301 (w), 1224 (s), 1142 (s), 1038 (m), 973 (w), 884 (w), 851 (m), 764 (w) cm<sup>-1</sup>. HRMS (ESI) calc. for C<sub>20</sub>H<sub>32</sub>BO<sub>3</sub> [M+H]<sup>+</sup> 331.2445, found 331.2440.  $[\alpha]_D^{20}$ : -13.22 (c = 0.50, CHCl<sub>3</sub>,  $l = 50$  mm).

#### Analysis of Stereochemistry:

The enantioselectivity was determined by SFC analysis of the reaction product. The analogous racemic material was prepared using RuPhos as the achiral ligand in the cross coupling reaction. The absolute stereochemistry was assigned by analogy.

*Chiral SFC (OD-H, Chiraldex, 5 mL/min, 3% <sup>i</sup>PrOH, 100 bar, 35 °C)-analysis of the reaction product.*

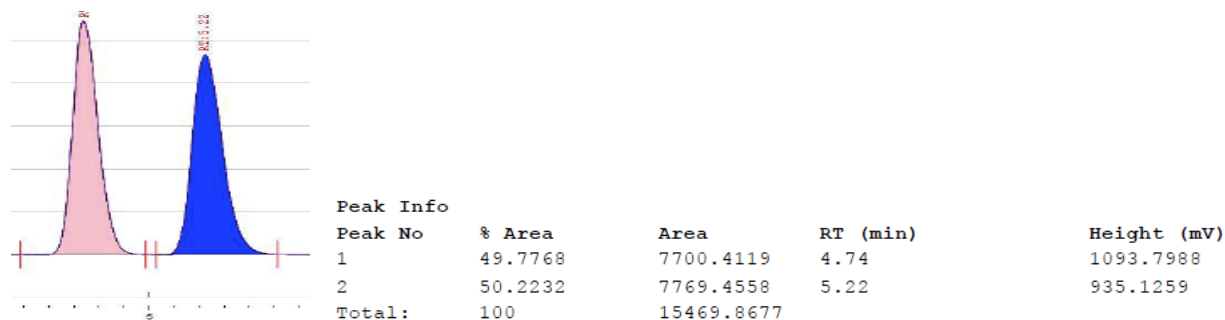

Racemic

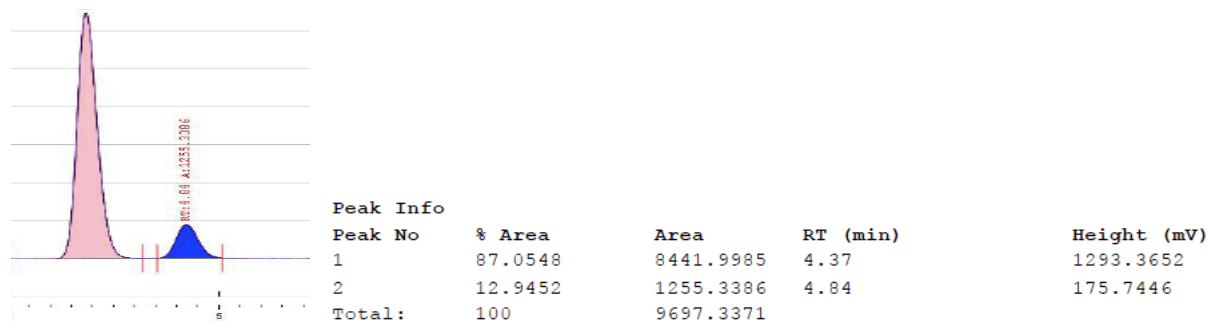

### Reaction product

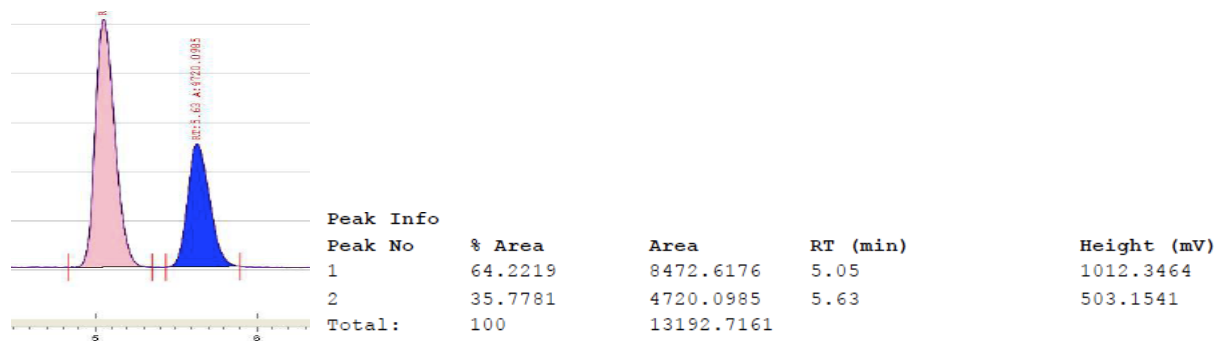

coinjection of racemic + reaction product

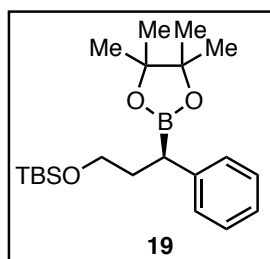

**(*R*)-tert-Butyldimethyl(3-phenyl-3-(4,4,5,5-tetramethyl-1,3,2-dioxaborolan-2-yl)propoxy)silane (19).** The reaction was performed according to *Representative Procedure (Method C)*. The crude reaction mixture was flashed slowly by column chromatography on SiO<sub>2</sub> (1:1 hexanes/dichloromethane, stain in CAM) to afford a brown oil (24.5 mg,

81% yield).  $R_f = 0.4$  in 90:10 hexanes/ethyl acetate on TLC. <sup>1</sup>H NMR (500 MHz, CDCl<sub>3</sub>) 7.26-7.19 (m, 4H), 7.14-7.11 (m, 1H), 3.58-3.50 (m, 2H), 2.47 (t,  $J = 7.9$  Hz, 1H), 2.07 (dq,  $J = 13.6, 6.9$  Hz, 1H), 1.87 (td,  $J = 13.8, 7.5$  Hz, 1H), 1.20 (s, 6H), 1.18 (s, 6H), 0.88 (s, 9H), 0.01 (s, 6H). <sup>13</sup>C NMR (125 MHz, CDCl<sub>3</sub>)  $\delta$  142.91, 128.59, 128.37, 125.28, 83.40, 62.33, 35.42, 26.14, 24.78, 24.70, 18.48, -5.12, -5.18. <sup>11</sup>B NMR (128 MHz, CDCl<sub>3</sub>)  $\delta$  33.06. IR (neat)  $\nu_{\max}$  2977 (w), 2953 (w), 2929 (m), 2886 (w), 2856 (m), 1471 (m), 1360 (s), 1322 (s), 1253 (s), 1142 (s), 1097 (s), 967 (w), 938 (w), 834 (s), 774 (s), 700 (s), 666 (w) cm<sup>-1</sup>.  $[\alpha]_D^{20}$ : -6.37 (c = 0.93, CHCl<sub>3</sub>,  $l = 50$  mm).

### Analysis Stereochemistry:

The enantioselectivity was determined by SFC analysis of the corresponding alcohol after the oxidation. The analogous racemic material was prepared using RuPhos as the achiral ligand in the cross coupling reaction. The absolute stereochemistry was assigned by analogy.

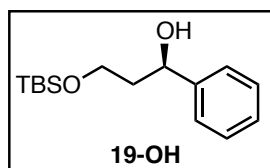

### (*R*)-3-((*tert*-Butyldimethylsilyloxy)-1-phenylpropan-1-ol (19-OH).

Prepared by oxidation of the boronate with NaOH/H<sub>2</sub>O<sub>2</sub> in THF. The crude reaction mixture was purified by column chromatography on SiO<sub>2</sub> (80:20 hexanes/ethyl acetate, stain in CAM) to afford a colorless solid.

<sup>1</sup>H NMR (500 MHz, CDCl<sub>3</sub>) 7.43-7.31 (m, 4H), 7.30-7.22 (m, 1H), 4.96 (dt, *J* = 7.6, 3.6 Hz, 1H), 3.88-3.84 (m, 2H), 3.76 (d, *J* = 2.9 Hz, 1H), 1.98-1.93 (m, 2H), 0.93 (s, 9H), 0.10 (d, *J* = 2.2 Hz, 6H). <sup>13</sup>C NMR (125 MHz, CDCl<sub>3</sub>) δ 144.67, 128.42, 127.29, 125.81, 74.23, 62.38, 40.73, 26.02, 18.30, -5.35, -5.39.

### Analysis of Stereochemistry:

The enantioselectivity was determined by SFC analysis of the reaction product. The absolute stereochemistry was assigned by analogy.

*Chiral SFC (OJ-H, Chiraldex, 6 mL/min, 1% <sup>1</sup>PrOH, 100 bar, 35 °C)-analysis of the reaction product.*

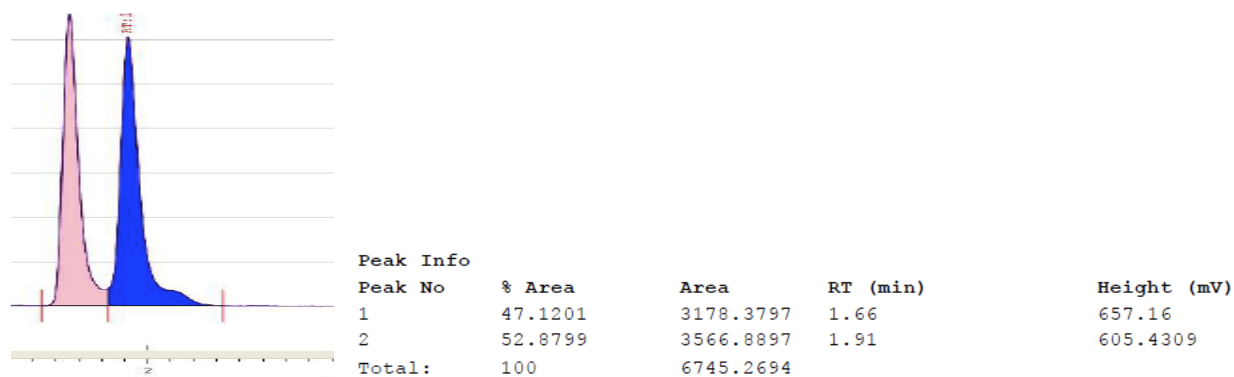

Racemic

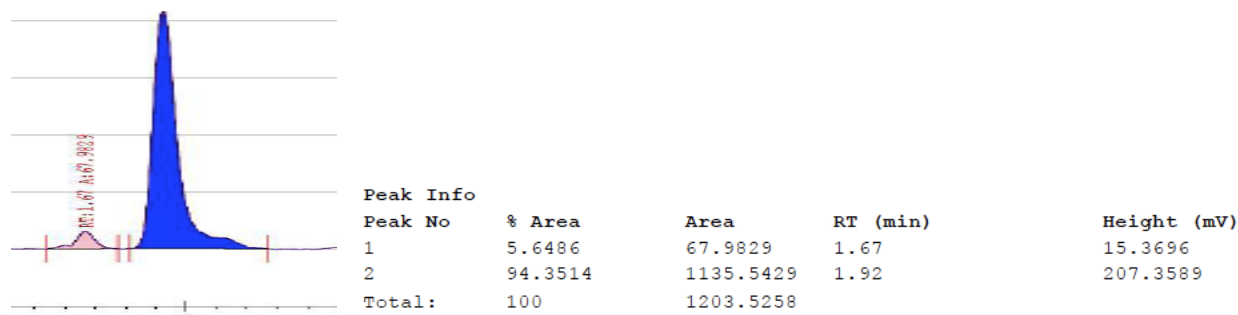

Reaction product

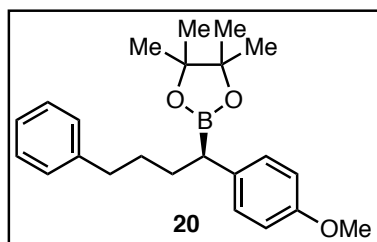

**(R)-2-(1-(4-methoxyphenyl)-4-phenylbutyl)-4,4,5,5-tetramethyl-1,3,2-dioxaborolane (20).** The reaction was

performed according to *Method C*. The crude reaction mixture was purified by column chromatography on SiO<sub>2</sub> (97:3 hexanes/ethyl acetate, stain in CAM) to afford a yellow oil (27.1

mg, 74% yield).  $R_f = 0.3$  in 90:10 hexanes/ethyl acetate on TLC. <sup>1</sup>H NMR (500 MHz, CDCl<sub>3</sub>) 7.27-7.24 (m, 2H), 7.17-7.11 (m, 5H), 6.82-6.79 (m, 2H), 3.78 (s, 1H), 2.61 (qt,  $J = 13.3, 7.5$  Hz, 1H), 2.28 (t,  $J = 7.8$  Hz, ), 1.87 (dq,  $J = 13.0, 7.7$  Hz, ), 1.68 (td,  $J = 14.1, 7.7$  Hz, ), 1.63-1.58 (m, 1H), 1.21 (s, 6H), 1.19 (s, 6H). <sup>13</sup>C NMR (125 MHz, CDCl<sub>3</sub>)  $\delta$  157.43, 142.85, 135.28, 129.33, 128.48, 128.30, 125.64, 113.85, 83.34, 55.29, 36.08, 32.69, 31.14, 24.79, 24.73. <sup>11</sup>B NMR (128 MHz, CDCl<sub>3</sub>)  $\delta$  33.45. IR (neat)  $\nu_{\max}$  3061 (w), 3025 (w), 2977 (m), 2929 (m), 2856 (w), 1607 (w), 1509 (s), 1455 (w), 1369 (s), 1322 (s), 1245 (s), 1178 (s), 1143 (s), 1037 (w), 967 (w), 851 (w), 829 (w), 747 (w), 699 (m) cm<sup>-1</sup>. HRMS (ESI) calc. for C<sub>23</sub>H<sub>32</sub>BO<sub>3</sub> [M+H]<sup>+</sup> 367.2445, found 367.2427.  $[\alpha]_D^{20}$ : -21.07 (c = 0.88, CHCl<sub>3</sub>, l = 50 mm).

#### ***Analysis of Stereochemistry:***

The enantioselectivity was determined by SFC analysis of the reaction product. The analogous racemic material was prepared using RuPhos as the achiral ligand in the cross coupling reaction. The absolute stereochemistry was assigned by analogy.



Chiral SFC (OJ-H, Chiraldex, 3 mL/min, 4% *i*PrOH, 100 bar, 35 °C)-analysis of the reaction product.

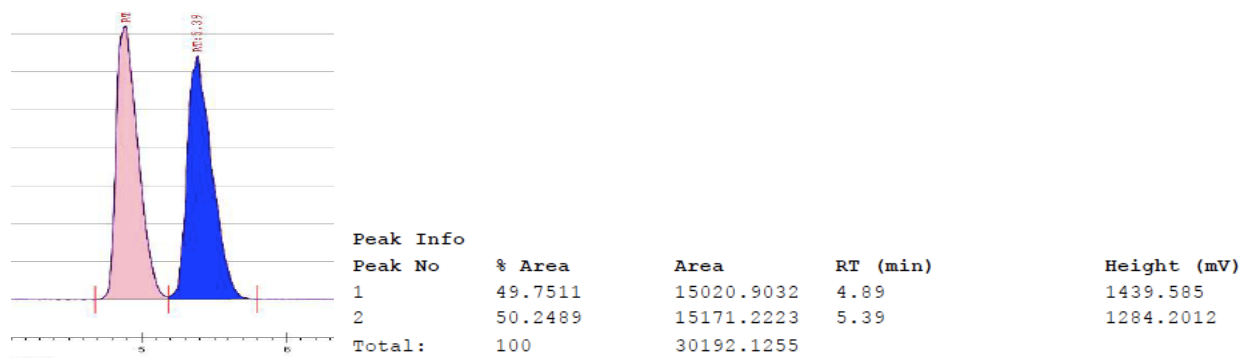

Racemic

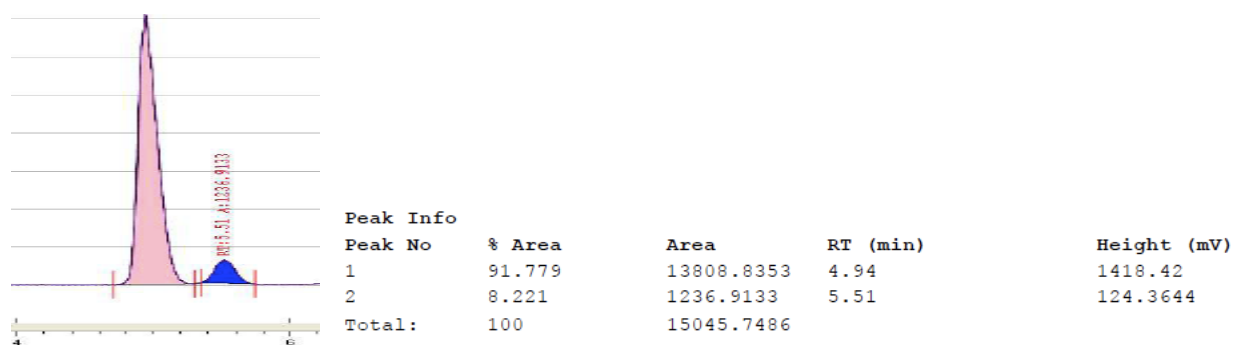

Reaction product

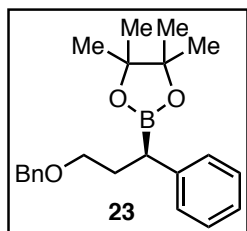

**(R)-2-(3-(benzyloxy)-1-phenylpropyl)-4,4,5,5-tetramethyl-1,3,2-dioxaborolane (23)**. The reaction was performed according to *Representative Procedure (Method C)*. The crude reaction mixture was purified by column chromatography on SiO<sub>2</sub> (50:50 to 25:75 hexanes/dichloromethane, stain in CAM) to afford a yellow oil (26.0 mg, 74% yield). *R<sub>f</sub>* = 0.4 in 25:75 hexanes/dichloromethane on TLC. <sup>1</sup>H NMR (500 MHz, CDCl<sub>3</sub>) 7.36-7.33 (m, 4H), 7.30-7.21 (m, 5H), 7.16-7.12 (m, 1H), 4.51-4.45 (m, 2H), 3.47 (ddd, *J* = 9.2, 6.4, 5.5 Hz, 1H), 3.40 (ddd, *J* = 9.2, 7.6, 6.3 Hz, 1H), 2.50 (t, *J* = 7.9 Hz, 1H), 2.26-2.19 (m, 1H), 1.98-1.91 (m, 1H), 1.18 (s, 6H), 1.16 (s, 6H). <sup>13</sup>C NMR (125 MHz, CDCl<sub>3</sub>) δ 142.80, 138.68, 128.40, 128.28, 128.27, 127.66, 127.40, 125.20, 83.26, 72.81, 69.40, 32.41, 24.58, 24.52. <sup>11</sup>B NMR (128 MHz, CDCl<sub>3</sub>) δ 33.39. IR (neat) *v*<sub>max</sub> 3061 (w), 3026 (w), 2976 (m), 2930 (m), 2856 (m), 1600 (w), 1493 (w), 1453 (m), 1359 (s), 1323 (s), 1271 (w), 1214 (w), 1142 (s), 1103 (s),

1028 (m), 967 (m), 850 (m), 736 (m), 699 (s)  $\text{cm}^{-1}$ . HRMS (ESI) calc. for  $\text{C}_{22}\text{H}_{30}\text{BO}_3$   $[\text{M}+\text{H}]^+$  353.2288, found 353.2286.  $[\alpha]_{\text{D}}^{20}$ : -28.02 (c = 1.48,  $\text{CHCl}_3$ ,  $l=50$  mm).

**Analysis of Stereochemistry:**

The enantioselectivity was determined by SFC analysis of the reaction product. The analogous racemic material was prepared using RuPhos as the achiral ligand in the cross coupling reaction. The absolute stereochemistry was assigned by comparing the optical rotation of the corresponding alcohol ( $[\alpha]_{\text{D}}^{20}$ : 23.12 (c = 0.64,  $\text{CHCl}_3$ ,  $l=50$  mm)) with the reported value in the literature.<sup>7</sup>

*Chiral SFC (OD-H, Chiraldex, 3 mL/min, 2% <sup>i</sup>PrOH, 100 bar, 35 °C)-analysis of the reaction product.*

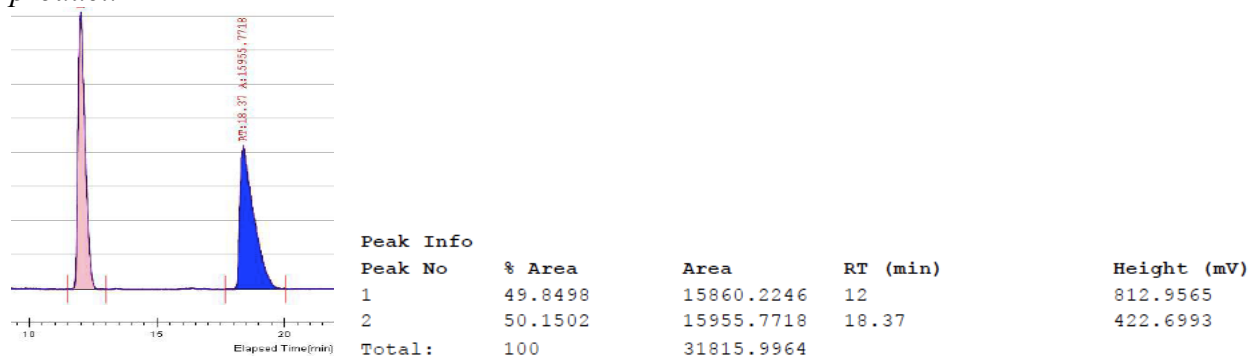

**Racemic**

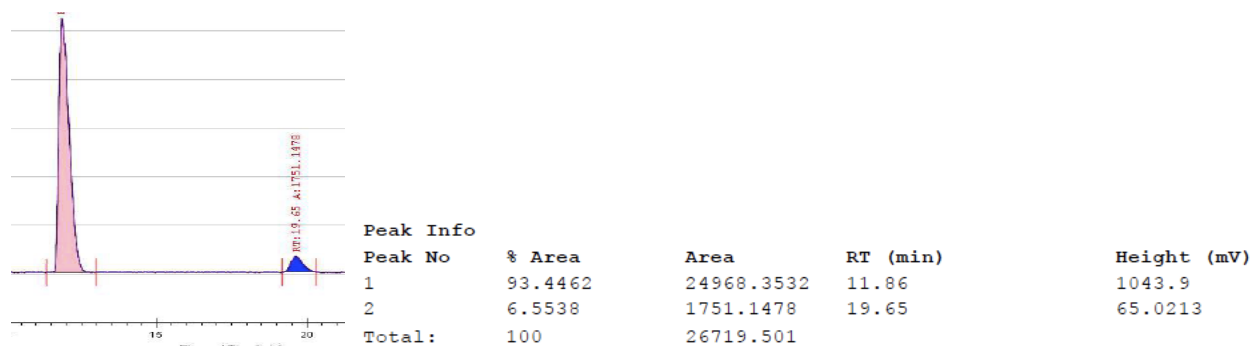

**Reaction product**

<sup>7</sup> Uozumi, Y.; Kitayama, K.; Hayashi, T. *Tetrahedron: Asymmetry* **1993**, *4*, 2419.

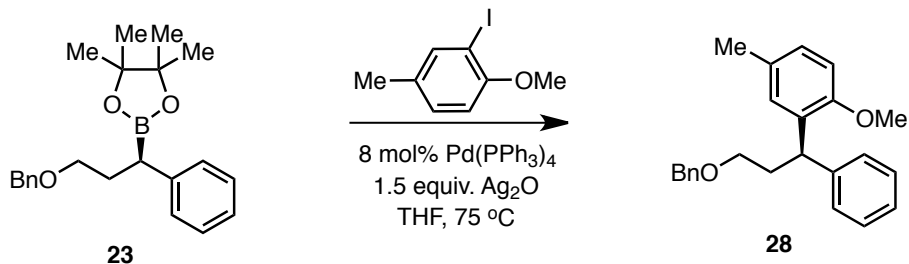

**(R)-2-(3-(benzyloxy)-1-phenylpropyl)-1-methoxy-4-methylbenzene (28).** The reaction was performed using the literature procedure<sup>8</sup> with slight modification. In the glove box, an oven-dried 2-dram vial with magnetic stir bar was charged with 2-iodo-1-methoxy-4-methylbenzene (15.1 mg, 0.06 mmol), Pd(PPh<sub>3</sub>)<sub>4</sub> (5.6 mg, 0.005 mmol) and Ag<sub>2</sub>O (21.1 mg, 0.091 mmol) followed by a solution of **23** (30.0 mg, 0.085 mmol) in THF (2.0 mL). The vial was sealed with a polypropylene cap, removed from the glove box, and heated to 75 °C in an oil bath for 16 hours. The vial was cooled to room temperature and diethyl ether (4.0 mL) was added. The resulting mixture was filtered through a short plug of silica gel. The filtrate was concentrated and purified on silica gel (hexanes: dichloromethane = 75:25) to afford colorless oil (18.2 mg, 88% yield). <sup>1</sup>H NMR (500 MHz, CDCl<sub>3</sub>) 7.34-7.22 (m, 9H), 7.16-7.12 (m, 1H), 7.04 (d, *J* = 2.0 Hz, 1H), 6.95 (dd, *J* = 8.3, 1.8 Hz, 1H), 6.72 (d, *J* = 8.2 Hz, 1H), 4.53 (t, *J* = 7.9 Hz, 1H), 4.47-4.42 (m, 2H), 3.44 (t, *J* = 6.8 Hz, 2H), 2.35 (qd, *J* = 7.3, 2.2 Hz, 2H), 2.26 (s, 3H). <sup>13</sup>C NMR (125 MHz, CDCl<sub>3</sub>) δ 152.44, 142.10, 136.11, 130.25, 127.00, 125.86, 125.68, 125.51, 124.95, 124.80, 124.79, 123.15, 108.23, 70.20, 66.28, 53.03, 37.31, 32.14, 18.15. IR (neat)  $\nu_{\max}$  3060 (w), 3026 (w), 2922 (m), 2856 (m), 1585 (w), 1498 (s), 1453 (m), 1364 (w), 1289 (w), 1243 (s), 1103 (m), 1030 (m), 806 (m), 735 (m), 698 (s) cm<sup>-1</sup>. HRMS (ESI) calc. for C<sub>24</sub>H<sub>27</sub>O<sub>2</sub> [M+H]<sup>+</sup> 347.2011, found 347.2017. [ $\alpha$ ]<sub>D</sub><sup>20</sup>: -10.86 (c = 0.60, CHCl<sub>3</sub>, *l* = 50 mm).

#### **Proof of Stereochemistry:**

The enantioselectivity was determined by SFC analysis of the reaction product. The analogous racemic material was prepared using the racemic benzyl boronate under the analogous reaction conditions. The absolute stereochemistry was assigned by comparison of the optical rotation of the corresponding aldehyde, which was obtained after benzyl deprotection and a subsequent oxidation, with the reported value in the literature (see below).

<sup>8</sup> Imao, D.; Glasspoole, B. W.; Laberge, V. S.; Crudden, C. M. *J. Am. Chem. Soc.* **2009**, *131*, 5024.

Chiral SFC (OD-H, Chiraldex, 3 mL/min, 5% <sup>i</sup>PrOH, 100 bar, 35 °C)-analysis of the reaction product.

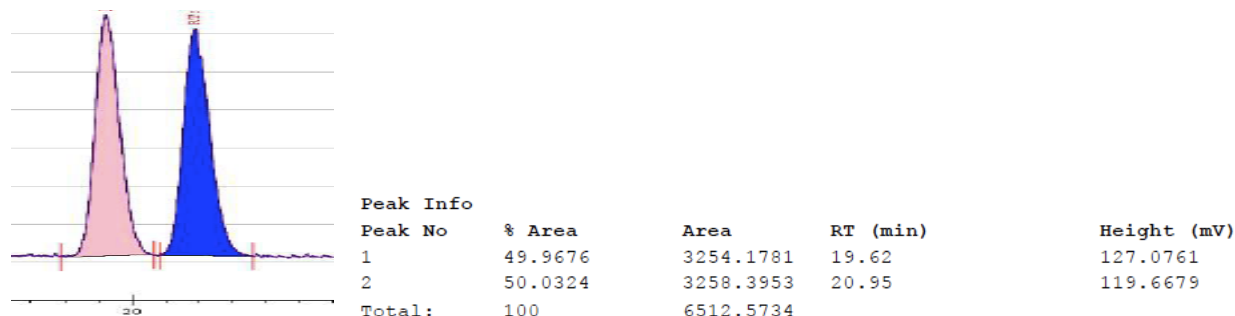

Racemic

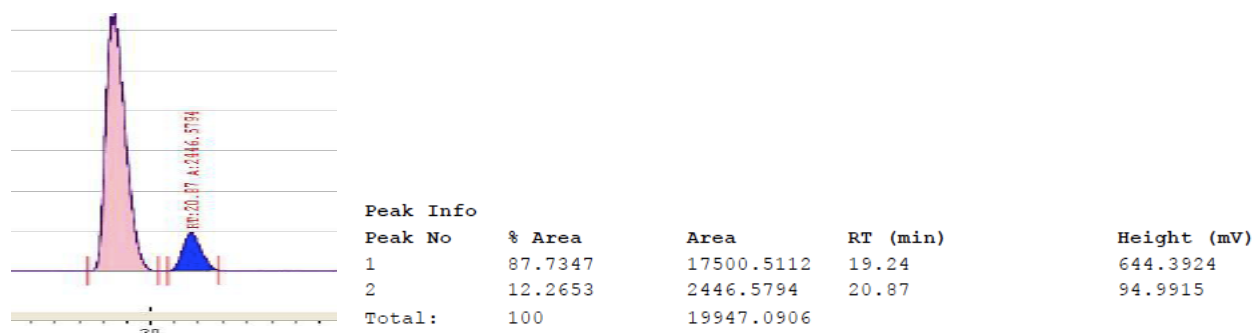

Reaction product

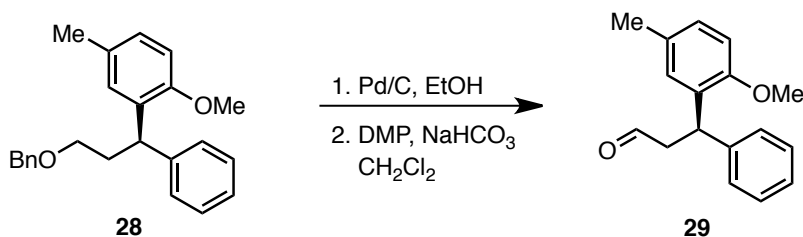

**(R)-3-(2-methoxy-5-methylphenyl)-3-phenylpropanal (29).** To a solution of **28** (37.0 mg, 0.107 mmol) in 2.0 mL of absolute ethanol was added Pd/C (10% wt on Pd basis) (11.7 mg, 0.011 mmol). The vial was sealed with a rubber septum and purged with N<sub>2</sub> for 3 times followed by purging with H<sub>2</sub> for 3 times. Then the reaction was allowed to stir at room temperature overnight. Upon the completion, the reaction mixture was filtered through a short pad of silica gel and concentrated under vacuum to give the crude alcohol, which was directly used for the next step without further purification. The crude alcohol was taken up in 2 mL CH<sub>2</sub>Cl<sub>2</sub>, and

NaHCO<sub>3</sub> (10.8 mg, 0.128 mmol) and Dess-Martin periodinane (54.4 mg, 0.128 mmol) were added. The reaction was allowed to stir at room temperature for 3 hours before being diluted with diethyl ether (2 mL). The resulting mixture was filtered through a short plug of silica gel and concentrated *in vacuo*. The crude product was purified on silica gel (hexanes: ethyl acetate = 5:95) to afford colorless oil (24.0 mg, 88% yield over 2 steps). <sup>1</sup>H NMR (500 MHz, CDCl<sub>3</sub>) 9.70 (t, *J* = 2.2 Hz, 1H), 7.31-7.26 (m, 4H), 7.21-7.18 (m, 1H), 6.99 (dd, *J* = 8.3, 1.7 Hz, 1H), 6.88 (d, *J* = 2.0 Hz, 1H), 6.76 (d, *J* = 8.3 Hz, 1H), 5.01 (t, *J* = 7.8 Hz, 1H), 3.78 (s, 3H), 3.10 (dd, *J* = 7.9, 2.2 Hz, 2H), 2.24 (s, 3H). <sup>13</sup>C NMR (125 MHz, CDCl<sub>3</sub>) δ 201.90, 154.57, 142.94, 131.32, 129.83, 128.83, 128.43, 128.05, 127.99, 126.35, 110.82, 55.53, 48.47, 38.29, 20.65. IR (neat) ν<sub>max</sub> 3060 (w), 3027 (w), 3001 (w), 2945 (w), 2923 (w), 2834 (w), 2723 (w), 1721 (s), 1601 (w), 1498 (s), 1452 (m), 1412 (m), 1290 (w), 1242 (s), 1181 (w), 1126 (m), 1054 (m), 1031 (s), 807 (s), 735 (w), 699 (s), 539 (w) cm<sup>-1</sup>. [α]<sub>D</sub><sup>20</sup>: 12.37 (c = 1.20, CHCl<sub>3</sub>, *l* = 50 mm). Lit.<sup>9</sup> (*S*) enantiomer = [α]<sub>D</sub><sup>20</sup>: -16.2 (c = 1.40, CHCl<sub>3</sub>, *l* = 50 mm).

## VII. Preparation of Compound 26

### Synthesis Summary:

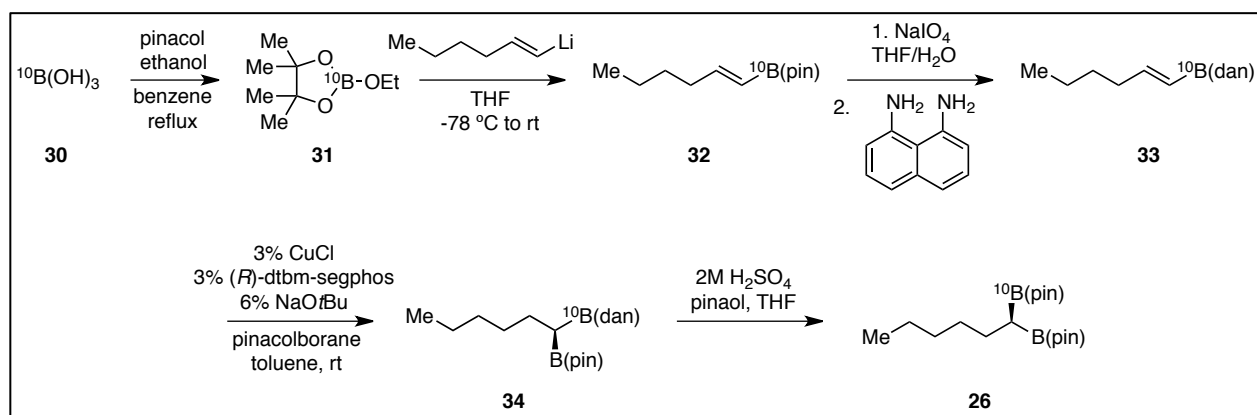

<sup>9</sup> Tokunaga, N.; Hayashi, T. *Tetrahedron: Asymmetry* **2006**, *17*, 607.



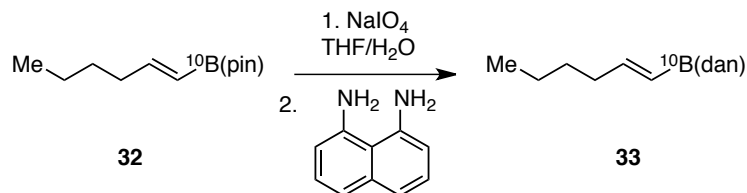

**Preparation of <sup>10</sup>B-33.** The reaction was performed according to a modified literature procedure.<sup>12</sup> To a 25 mL round bottom flask, <sup>10</sup>B-32 (332 mg, 1.6 mmol) was combined with sodium periodate (378.6 mg, 1.77 mmol) and stirred in a 1:1 mixture of THF/water (12 mL) for 30 minutes. Then HCl<sub>(aq)</sub> was added (1.12 mL, 1.0 M, 1.12 mmol). The reaction stirred for 12 hours at room temperature. Water (5 mL) and ethyl acetate (5 mL) were added, and the layers were separated. The aqueous layer was extracted with ethyl acetate (3 x 10 mL). The organics were combined, dried over Na<sub>2</sub>SO<sub>4(s)</sub>, filtered, and concentrated *in vacuo*. 1,8-Diaminonaphthalene (240.5 mg, 1.52 mmol) and toluene (12 mL) were added and the flask was equipped with a Dean-Stark trap. The apparatus was purged with N<sub>2</sub>, and the reaction was refluxed at 145°C for 3 hours; the reaction was then cooled to room temperature and concentrated *in vacuo*. The crude reaction mixture was purified by column chromatography on SiO<sub>2</sub> (70:25:5 hexanes/ethyl acetate/triethylamine, stain in CAM) to afford brown oil (231.1 mg, 61% yield). <sup>1</sup>H NMR (500 MHz, CDCl<sub>3</sub>) 7.09 (t, *J* = 7.8 Hz, 2H), 7.00 (d, *J* = 8.4 Hz, 2H), 6.37 (dt, *J* = 18.0, 6.4 Hz, 1H), 6.31 (d, *J* = 7.3 Hz, 2H), 5.70 (br, 2H), 5.56 (dt, *J* = 18.0, 1.5 Hz, 1H), 2.23-2.18 (m, 2H), 1.47-1.41 (m, 2H), 1.36 (dq, *J* = 14.9, 7.3 Hz, 2H), 0.93 (t, *J* = 7.2 Hz, 3H). <sup>13</sup>C NMR (125 MHz, CDCl<sub>3</sub>) δ 148.11, 141.36, 136.43, 127.63, 119.80, 117.43, 105.67, 35.64, 30.89, 22.37, 14.07. IR (neat)  $\nu_{\text{max}}$  3407 (br), 3052 (w), 2954 (m), 2924 (w), 2868 (w), 2855 (w), 1638 (m), 1596 (s), 1512 (s), 1414 (s), 1358 (s), 1261 (w), 1159 (s), 1054 (m), 985 (m), 817 (s), 757 (m), 645 (m) 588 (s) cm<sup>-1</sup>. HRMS (ESI) calc. for C<sub>12</sub>H<sub>20</sub><sup>10</sup>BN<sub>2</sub> [M+H]<sup>+</sup> 250.1756, found 250.1759.

(12) Koyanagi, M.; Eichenauer, N.; Ihara, H.; Yamamoto, T.; Suginome, M. *Chem. Lett.* **2013**, *42*, 541.

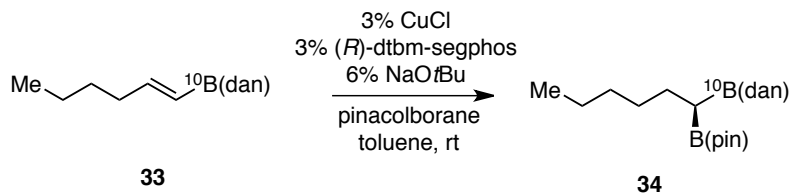

**Preparation of (S)-<sup>10</sup>B-34.** The reaction was performed according to a literature procedure.<sup>13</sup> In the glove box, an oven-dried 2-dram vial with magnetic stir bar was charged with Cu(I)Cl (2.7 mg, 0.027 mmol), NaOtBu (5.3 mg, 0.055 mmol), and (R)-(-)-dtbm-segphos (32.4 mg, 0.027 mmol). The vial was removed from the glove box, and toluene (1.5 mL) was added. The reaction stirred for 10 minutes at room temperature. Then pinacol borane (159.3  $\mu\text{L}$ , 1.10 mmol) was added and stirred at room temperature for an additional 10 minutes. Substrate **33** (228.0 mg, 0.915 mmol) in toluene (1.2 mL) was added to the reaction mixture. The reaction was allowed to stir at room temperature for 20 hours. The reaction mixture was filtered through a pad of Celite with toluene (3 mL), and concentrated *in vacuo*. The product was purified by column chromatography on SiO<sub>2</sub> (90:10 hexanes/ethyl acetate) to afford white solid (300.2 mg, 87% yield). <sup>1</sup>H NMR (500 MHz, CDCl<sub>3</sub>) 7.10 (t, *J* = 7.8 Hz, 2H), 7.01 (d, *J* = 7.7 Hz, 2H), 6.30 (d, *J* = 7.3 Hz, 2H), 5.80 (br, 2H), 1.69-1.61 (m, 1H), 1.56-1.48 (m, 1H), 1.41-1.30 (m, 6H), 1.27 (s, 6H), 1.26 (s, 6H), 0.91 (t, *J* = 6.8 Hz, 3H), 0.76 (dd, *J* = 9.4, 6.0 Hz, 1H). <sup>13</sup>C NMR (125 MHz, CDCl<sub>3</sub>)  $\delta$  141.47, 136.40, 127.64, 119.60, 117.30, 105.51, 83.23, 32.16, 32.03, 26.49, 25.13, 24.60, 22.68, 14.19. <sup>11</sup>B NMR (128 MHz, CDCl<sub>3</sub>)  $\delta$  34.00. IR (neat)  $\nu_{\text{max}}$  3407 (br), 3055 (w), 2974 (w), 2957 (w), 1140 (s), 850 (w), 820 (m), 764 (s) cm<sup>-1</sup>. HRMS (ESI) calc. for C<sub>22</sub>H<sub>33</sub><sup>10</sup>B<sup>11</sup>BN<sub>2</sub>O<sub>2</sub> [M+H]<sup>+</sup> 378.2764, found 378.2750. Melting point: 109-111 °C. [ $\alpha$ ]<sub>D</sub><sup>20</sup>: 12.72 (c = 1.54, CHCl<sub>3</sub>, *l* = 50 mm).

(13) Feng, X.; Jeon, H.; Yun, J. *Angew. Chem., Int. Ed.* **2013**, *52*, 3989.



### Analysis of Stereochemistry

Chiral SFC (AD-H, Chiraldex, 3 mL/min, 5% <sup>i</sup>PrOH, 100 bar, 35 °C)-analysis of the reaction product.

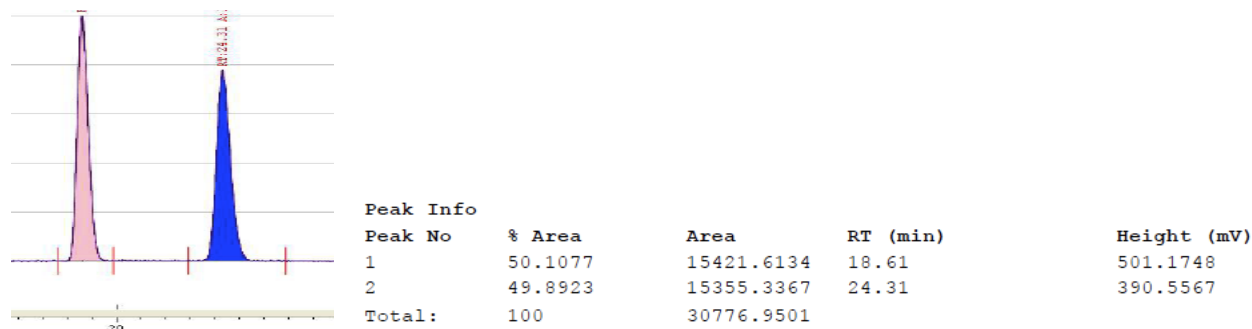

racemic

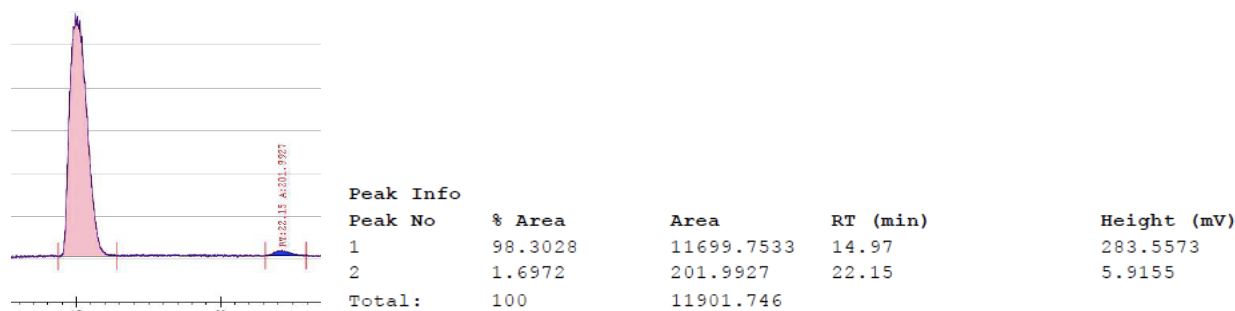

reaction product

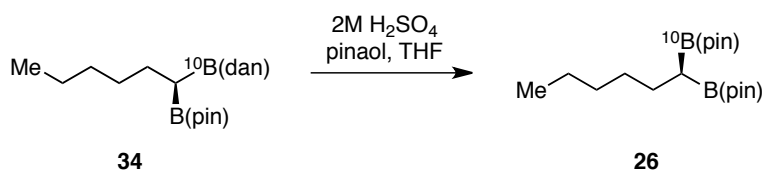

**Preparation of (S)-<sup>10</sup>B-26.** The reaction was performed according to a literature procedure.<sup>14</sup> To a stirred solution of <sup>10</sup>B-**34** (377 mg, 1.00 mmol) in THF (10 mL) was added 2 M H<sub>2</sub>SO<sub>4(aq)</sub> (1.5 mL, 3.0 mmol) and pinacol (591 mg, 5.00 mmol) sequentially. The reaction was stirred for 24 h at room temperature before quenched by the addition of water (10 mL). The mixture was then extracted by diethyl ether (3 × 10 mL), dried over Na<sub>2</sub>SO<sub>4</sub>, filtered, and concentrated *in vacuo*. The crude product was then purified by flash column chromatography (1:3 hexanes/dichloromethane to 15% ethyl acetate/hexane) to give pure **26** as a brown oil (317 mg, 94% yield). <sup>1</sup>H NMR (500 MHz, CDCl<sub>3</sub>) 1.56-1.51 (m, 2H), 1.31-1.24 (m, 6H), 1.23 (s, 12H),

<sup>14</sup> Lee, J. C. H.; McDonald, R.; Hall, D. G. *Nature Chemistry*, **2011**, *3*, 894.

1.22 (s, 12H), 0.85 (t,  $J = 7.0$  Hz, 3H), 0.71 (t,  $J = 7.9$  Hz, 1H).  $^{13}\text{C}$  NMR (125 MHz,  $\text{CDCl}_3$ )  $\delta$  82.94, 32.34, 31.93, 25.75, 24.96, 24.63, 22.64, 14.14.  $^{11}\text{B}$  NMR (128 MHz,  $\text{CDCl}_3$ )  $\delta$  33.74. IR (neat)  $\nu_{\text{max}}$  2977 (m), 2926 (m), 2858 (w), 1467 (w), 1347 (s), 1308 (s), 1267 (s), 1215 (m), 1139 (s), 968 (m), 905 (w), 849 (m), 731 (m), 699 (w), 578 (w)  $\text{cm}^{-1}$ . HRMS (ESI) calc. for  $\text{C}_{18}\text{H}_{37}^{10}\text{B}^{11}\text{BO}_4$   $[\text{M}+\text{H}]^+$  338.2914, found 338.2912.

### VIII. Cross-coupling of (S)- $^{10}\text{B}$ -26.

#### A. Calculated isotope ratio in product 27 prepared using (R,R)-L3 ligand and assuming inversion during coupling:

note: bis(boronate) starting material (**26**) = 98:2 er  
 cross-coupling reaction selectivity = 92:8 er  
 natural abundance of boron is  $^{10}\text{B}:^{11}\text{B} = 19.9:80.1$

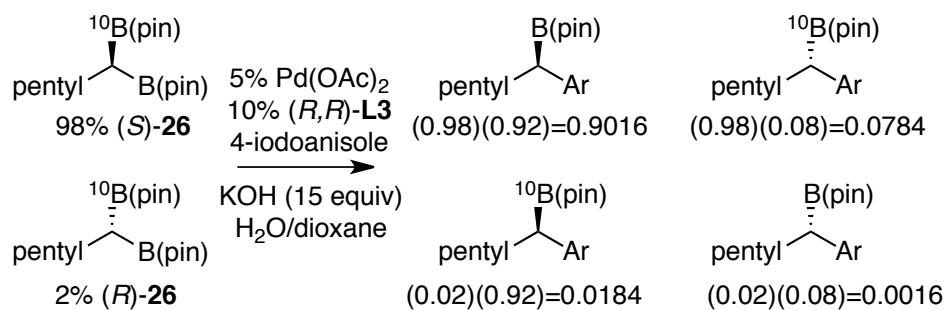

$$^{10}\text{B} = (0.199)(.9016) + 0.0784 + 0.0184 + (0.199)(0.0016) = 0.276$$

$$^{11}\text{B} = (0.801)(.9016) + (0.801)(0.0016) = 0.723$$

#### Relative [M+H] distributions for $^{10}\text{B}$ -27

|                                                                    |     |       |
|--------------------------------------------------------------------|-----|-------|
| $\text{C}_{19}\text{H}_{32}^{10}\text{BO}_3$ [M+H]:                | 318 | 0.816 |
| $\text{C}_{18}^{13}\text{CH}_{32}^{10}\text{BO}_3$ [M+H]:          | 319 | 0.167 |
| $\text{C}_{17}^{13}\text{C}_2\text{H}_{32}^{10}\text{BO}_3$ [M+H]: | 320 | 0.016 |

#### Relative [M+H] distributions for $^{11}\text{B}$ -27

|                                                                    |     |       |
|--------------------------------------------------------------------|-----|-------|
| $\text{C}_{19}\text{H}_{32}^{11}\text{BO}_3$ [M+H]:                | 319 | 0.816 |
| $\text{C}_{18}^{13}\text{CH}_{32}^{11}\text{BO}_3$ [M+H]:          | 320 | 0.167 |
| $\text{C}_{17}^{13}\text{C}_2\text{H}_{32}^{11}\text{BO}_3$ [M+H]: | 321 | 0.016 |

#### Calculated Relative Intensities (27.6% of $^{10}\text{B}$ -27 + 72.3% $^{11}\text{B}$ -27)

|                                                             |              |
|-------------------------------------------------------------|--------------|
| [M+H] for 318 amu = (0.276)(0.816) = 0.225                  | Found: 0.245 |
| [M+H] for 319 amu = (0.276)(0.167) + (0.723)(0.816) = 0.636 | Found: 0.638 |
| [M+H] for 320 amu = (0.276)(0.016) + (0.723)(0.167) = 0.125 | Found: 0.106 |
| [M+H] for 321 amu = (0.723)(0.016) = 0.012                  | Found: 0.011 |

**B. Calculated isotope ratio in product 27 prepared using (S,S)-L3 ligand and assuming inversion during coupling:**

note: bis(boronate) starting material (**26**) = 98:2 er  
 cross-coupling reaction selectivity = 92:8 er  
 natural abundance of boron is  $^{10}\text{B}:$  $^{11}\text{B}$  = 19.9:80.1

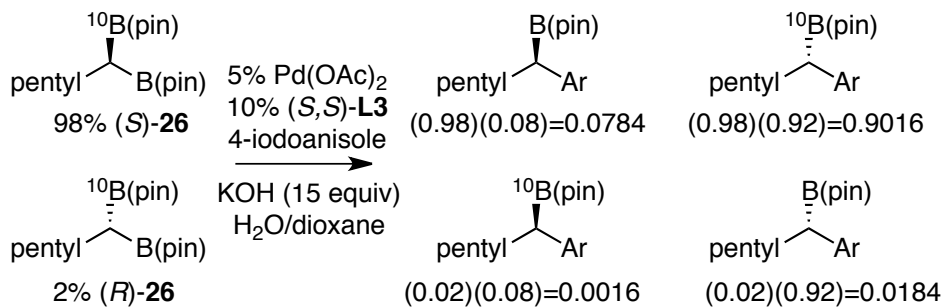

$$^{10}\text{B} = (0.199)(0.0784) + 0.9016 + 0.0016 + (0.199)(0.0184) = 0.922$$

$$^{11}\text{B} = (0.801)(0.0784) + (0.801)(0.0184) = 0.077$$

Relative [M+H] distributions for  $^{10}\text{B-27}$

|                                                                    |     |       |
|--------------------------------------------------------------------|-----|-------|
| $\text{C}_{19}\text{H}_{32}^{10}\text{BO}_3$ [M+H]:                | 318 | 0.816 |
| $\text{C}_{18}^{13}\text{CH}_3^{10}\text{BO}_3$ [M+H]:             | 319 | 0.167 |
| $\text{C}_{17}^{13}\text{C}_2\text{H}_{32}^{10}\text{BO}_3$ [M+H]: | 320 | 0.016 |

Relative [M+H] distributions for  $^{11}\text{B-27}$

|                                                                    |     |       |
|--------------------------------------------------------------------|-----|-------|
| $\text{C}_{19}\text{H}_{32}^{11}\text{BO}_3$ [M+H]:                | 319 | 0.816 |
| $\text{C}_{18}^{13}\text{CH}_3^{11}\text{BO}_3$ [M+H]:             | 320 | 0.167 |
| $\text{C}_{17}^{13}\text{C}_2\text{H}_{32}^{11}\text{BO}_3$ [M+H]: | 321 | 0.016 |

Calculated Relative Intensities (92.2% of  $^{10}\text{B-27}$  + 7.7%  $^{11}\text{B-27}$ )

|                                                             |              |
|-------------------------------------------------------------|--------------|
| [M+H] for 318 amu = (0.922)(0.816) = 0.752                  | Found: 0.776 |
| [M+H] for 319 amu = (0.922)(0.167) + (0.077)(0.816) = 0.217 | Found: 0.194 |
| [M+H] for 320 amu = (0.922)(0.016) + (0.077)(0.167) = 0.028 | Found: 0.027 |
| [M+H] for 321 amu = (0.077)(0.016) = 0.001                  | Found: 0.003 |

**Sample Name** BP-IV-143-4 **Position** Via 41 **Instrument Name** Instrument 1 **User Name**  
**Inj Vol** 5 **InjPosition** **SampleType** Sample **RM Calibration Status**  
**Data Filename** BP-IV-143-4.d **ACQ Method** BP small molecule.m **Comment** **Acquired Time** 12/13/2013 8:00:56 PM **Success**

+ESI Scan (23.368 min) Frag=175.0V BP-IV-143-4.d

[M+H]<sup>+</sup>

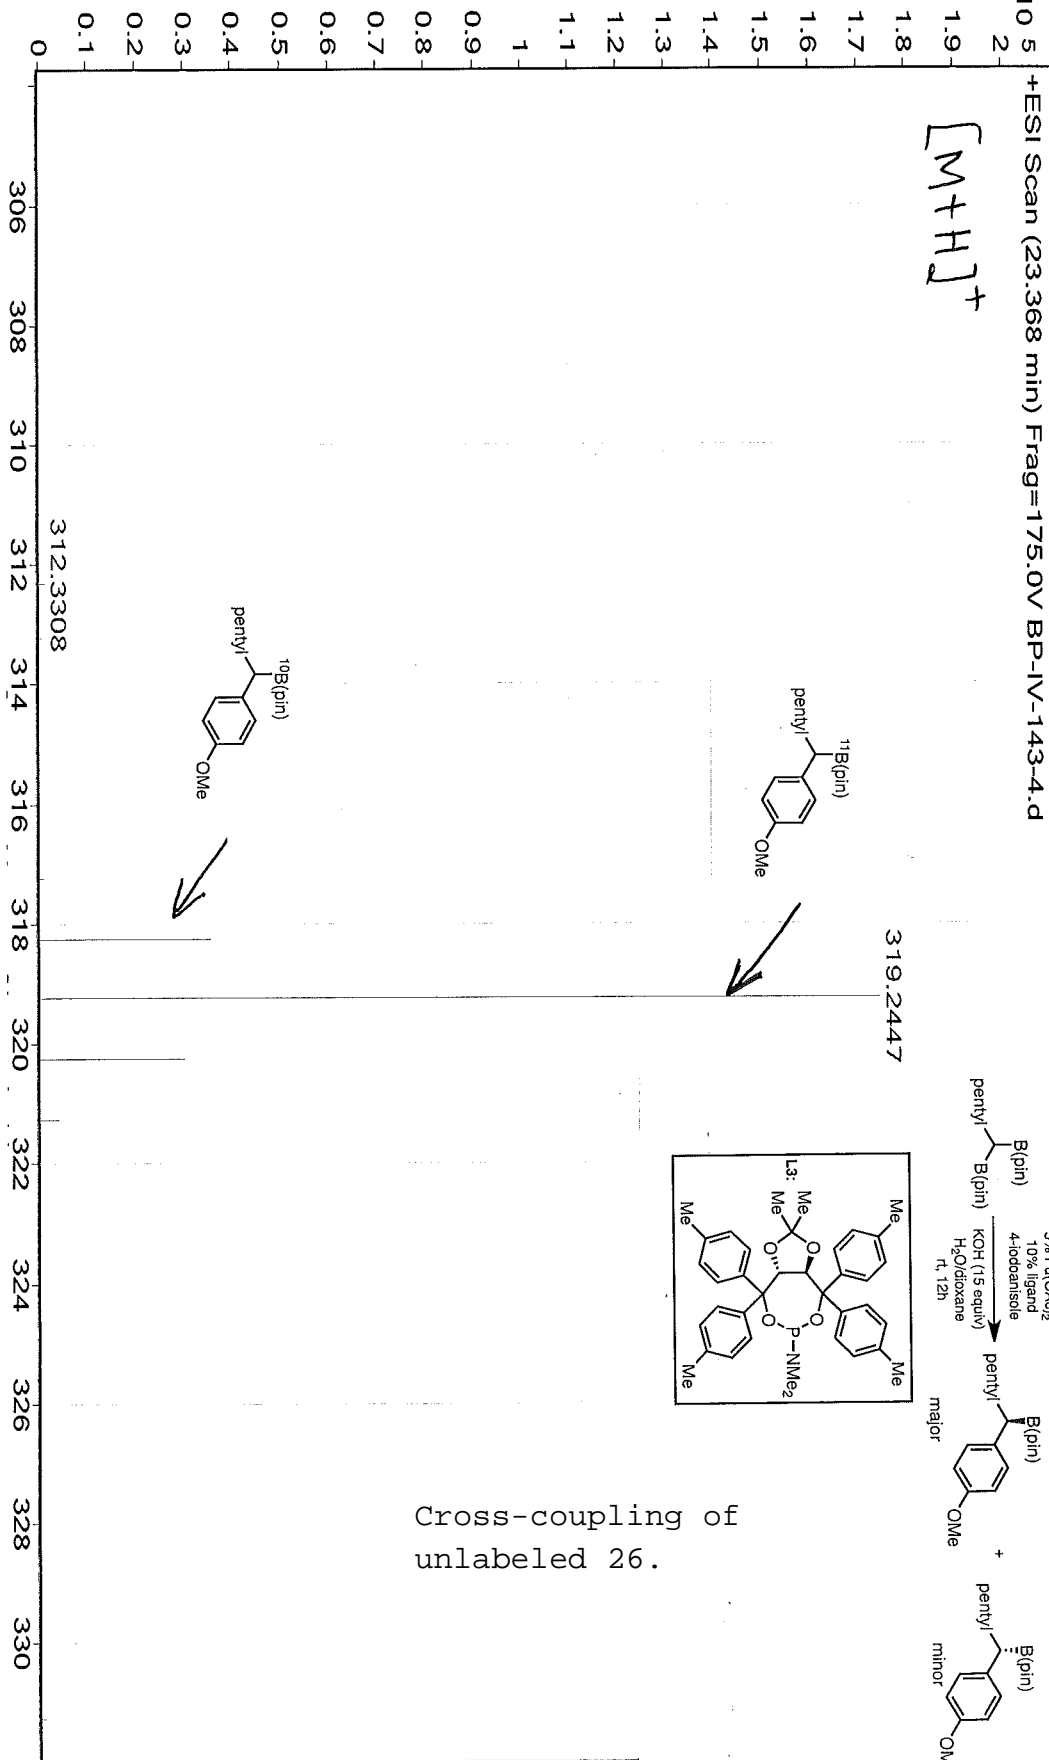

Sample Name  
Inj Vol  
Data Filename

Position  
InjPosition  
Acq Method

Instrument Name  
SampleType  
Comment

User Name  
IRM Calibration Status  
Acquired Time

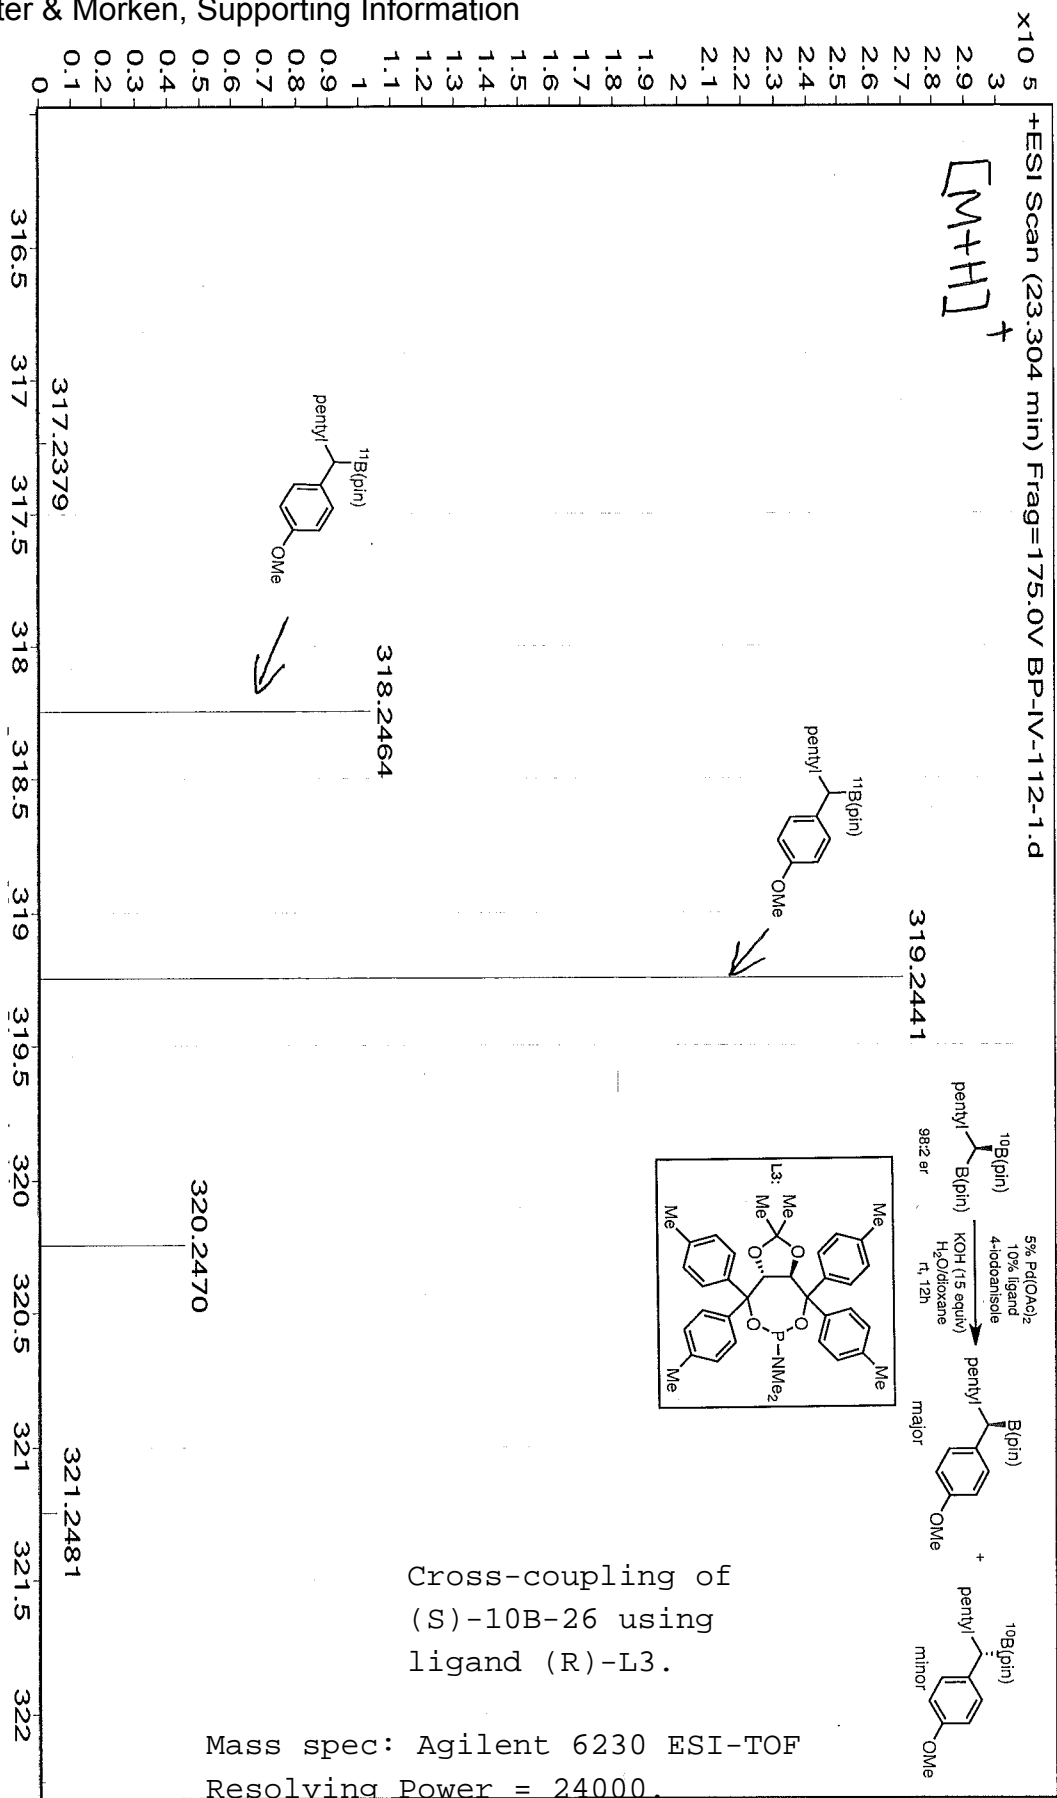

Sample Name  
Inj Vol  
Data Filename

Position  
InjPosition  
Acq Method

Instrument Name  
SampleType  
Comment

User Name  
IRM Calibration Status  
Acquired Time

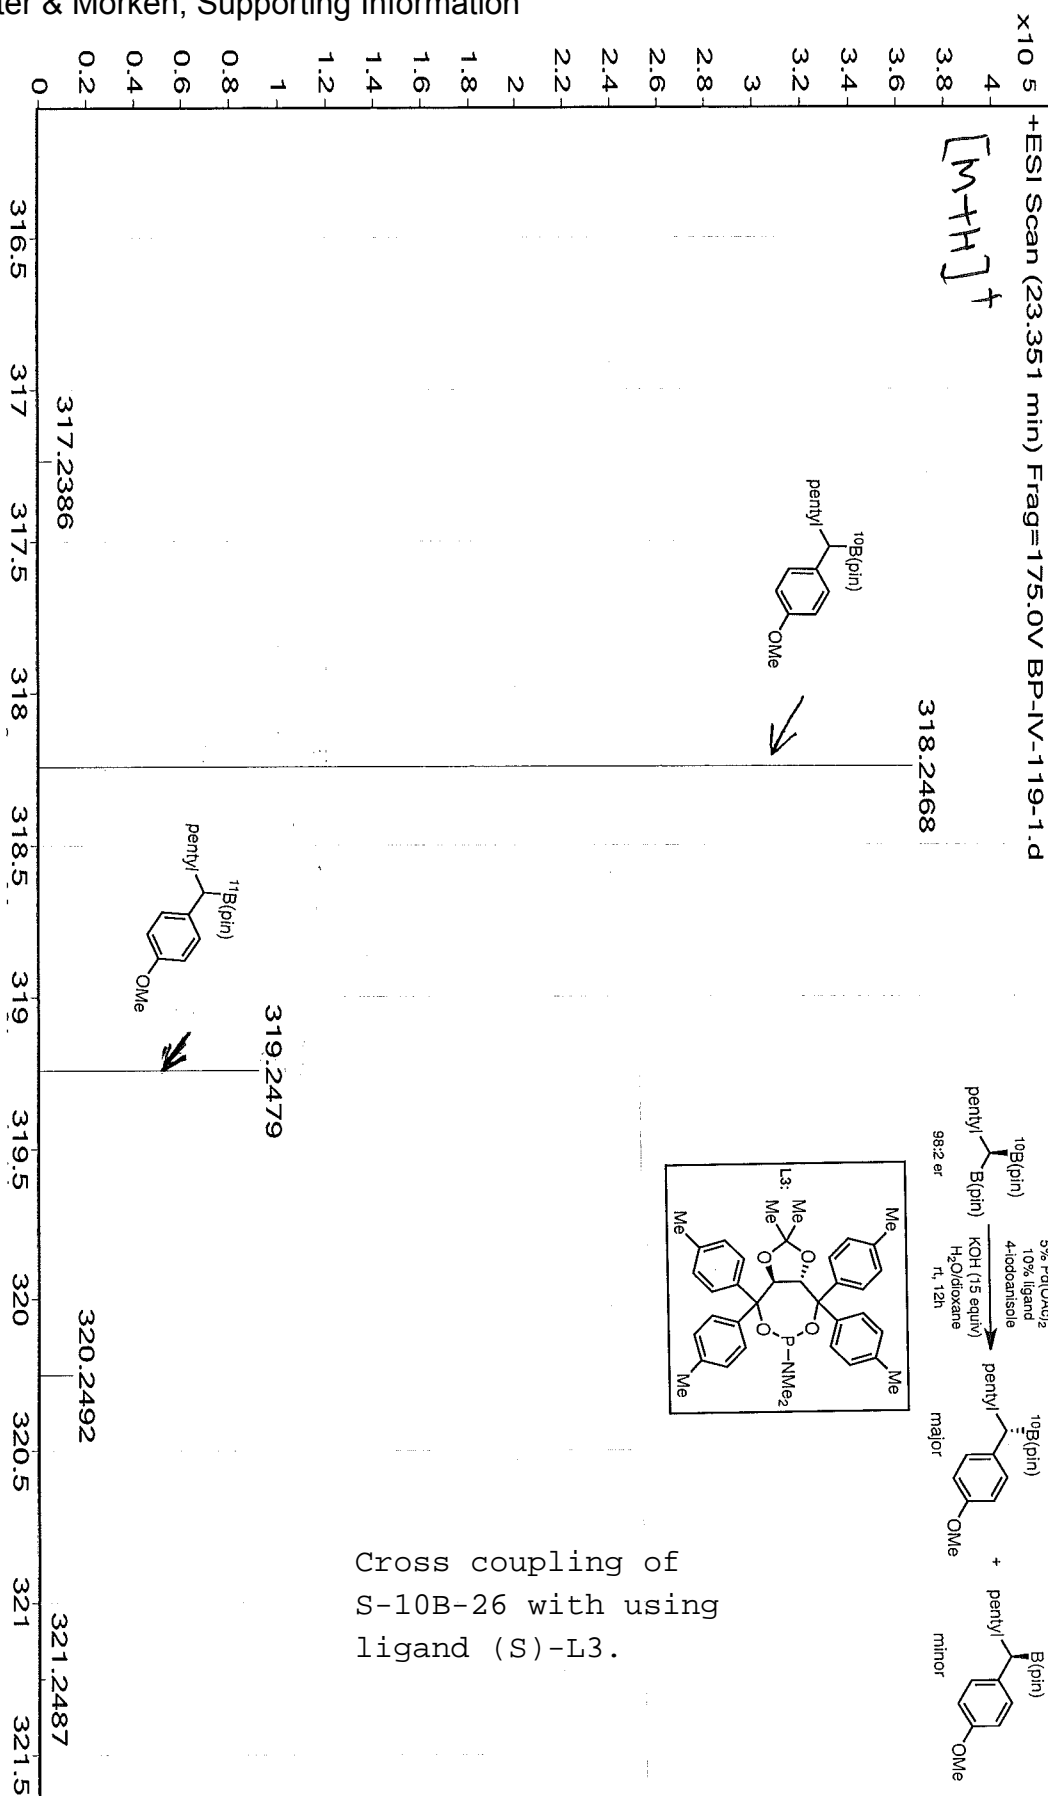

## IX. Cross-over Experiment (Equation 4)

Preparation 1-*d*<sub>24</sub>.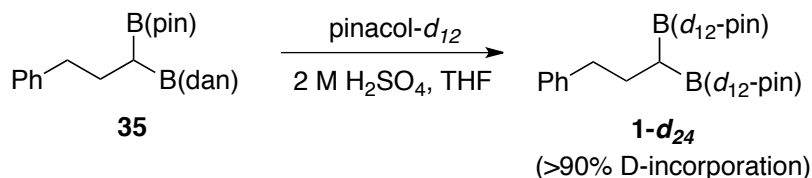

To a solution of **35** (124 mg, 0.30 mmol) in THF (0.6 mL) was added pinacol-*d*<sub>12</sub> (392 mg, 3.0 mmol) followed by 2 M H<sub>2</sub>SO<sub>4</sub> (0.35 mL, 0.90 mmol). The reaction was stirred at room temperature overnight and then filtered through a short pad of silica gel, concentrated and purified by column chromatography on SiO<sub>2</sub> (95:5 hexane/ethyl acetate, stain in CAM) to afford a colorless solid of 37 mg, yield 34%. *R*<sub>f</sub> = 0.5 in 90:10 hexanes/ethyl acetate on TLC.

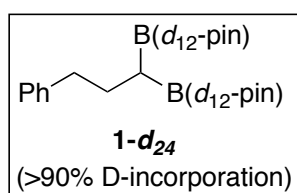

<sup>1</sup>H NMR (500 MHz, CDCl<sub>3</sub>) δ 7.25-7.22 (m, 3H), 7.18-7.12 (m, 2H), 2.59 (t, *J* = 8.0 Hz, 2H), 1.85 (q, *J* = 8.0 Hz, 2H), 1.23 (s, 1H), 1.23 (s, 1H), 0.81 (t, *J* = 7.9 Hz, 1H). <sup>13</sup>C NMR (125 MHz, CDCl<sub>3</sub>) δ 143.06, 128.68, 128.20, 125.56, 83.06, 82.72, 38.82, 25.02, 24.62. HRMS (ESI)

calc. for C<sub>21</sub>H<sub>11</sub>D<sub>24</sub>B<sub>2</sub>O<sub>4</sub> [M+H]<sup>+</sup> 397.4150, found 397.4222.

## A. Cross-over Experiment of geminal bis(boronates) under basic condition:

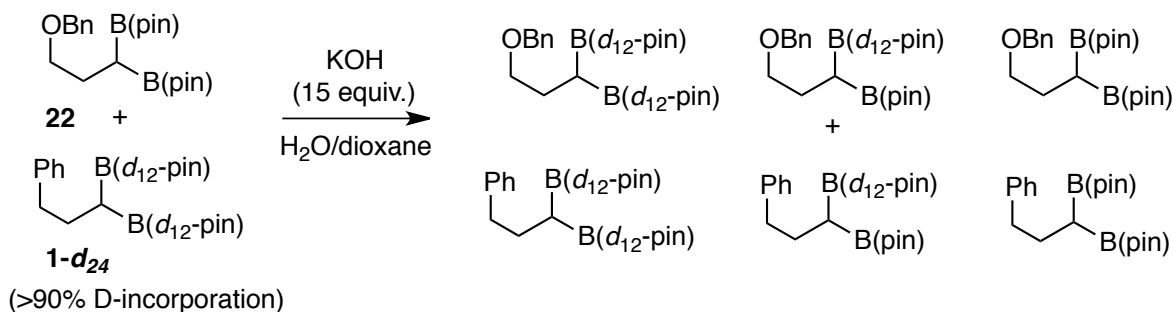

Boronate **22** (40.2 mg, 0.1 mmol) was mixed with **1-*d*<sub>24</sub>** (36.2 mg, 0.1 mmol) in 0.4 mL dioxane and 0.38 mL of KOH (8M) and stirred for 6 hours. Then ether was added and the mixture filtered through silica gel prior to purification by silica gel chromatography to furnish labeled **1** (18 mg) and labeled **22** (10 mg).

Acq. Data Name: cs2-246-2  
 Creation Parameters: Average(MS11) Time: 0.111.0.12)-1.0\*Average(MS11) Time: 0.03.0.10  
 Comment: suncc\*SM\*cs2-246-2\*2-246\*morken  
 x10<sup>3</sup> Intensity (630800)

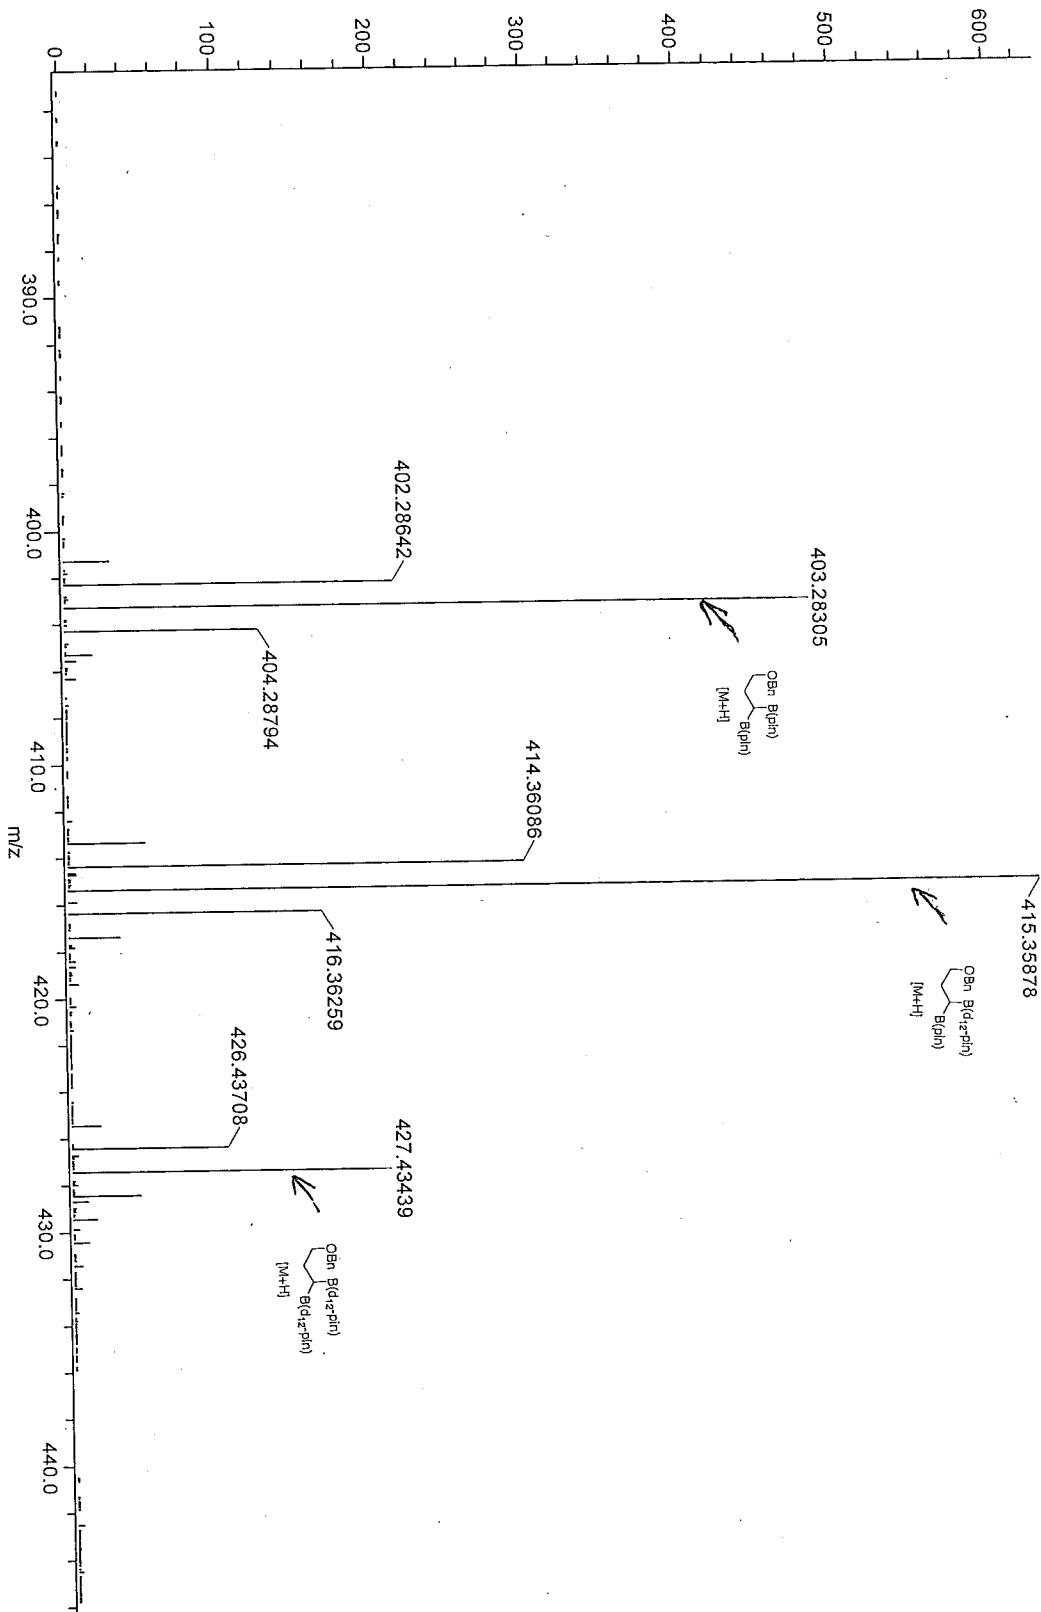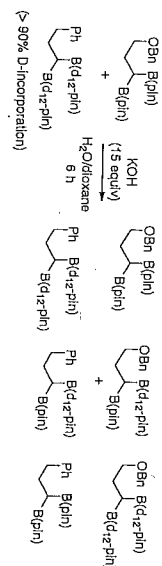



Acq. Data Name: cs2-246-1  
 Creation Parameters: Average(MS[1]) Time:0.13.0.15)-1.0\*Average(MS[1]) Time:0.03.0.10)  
 Comment: suncc\*SM\*cs2-246-1\*2-246\*morken  
 x10<sup>3</sup> Intensity (110240)

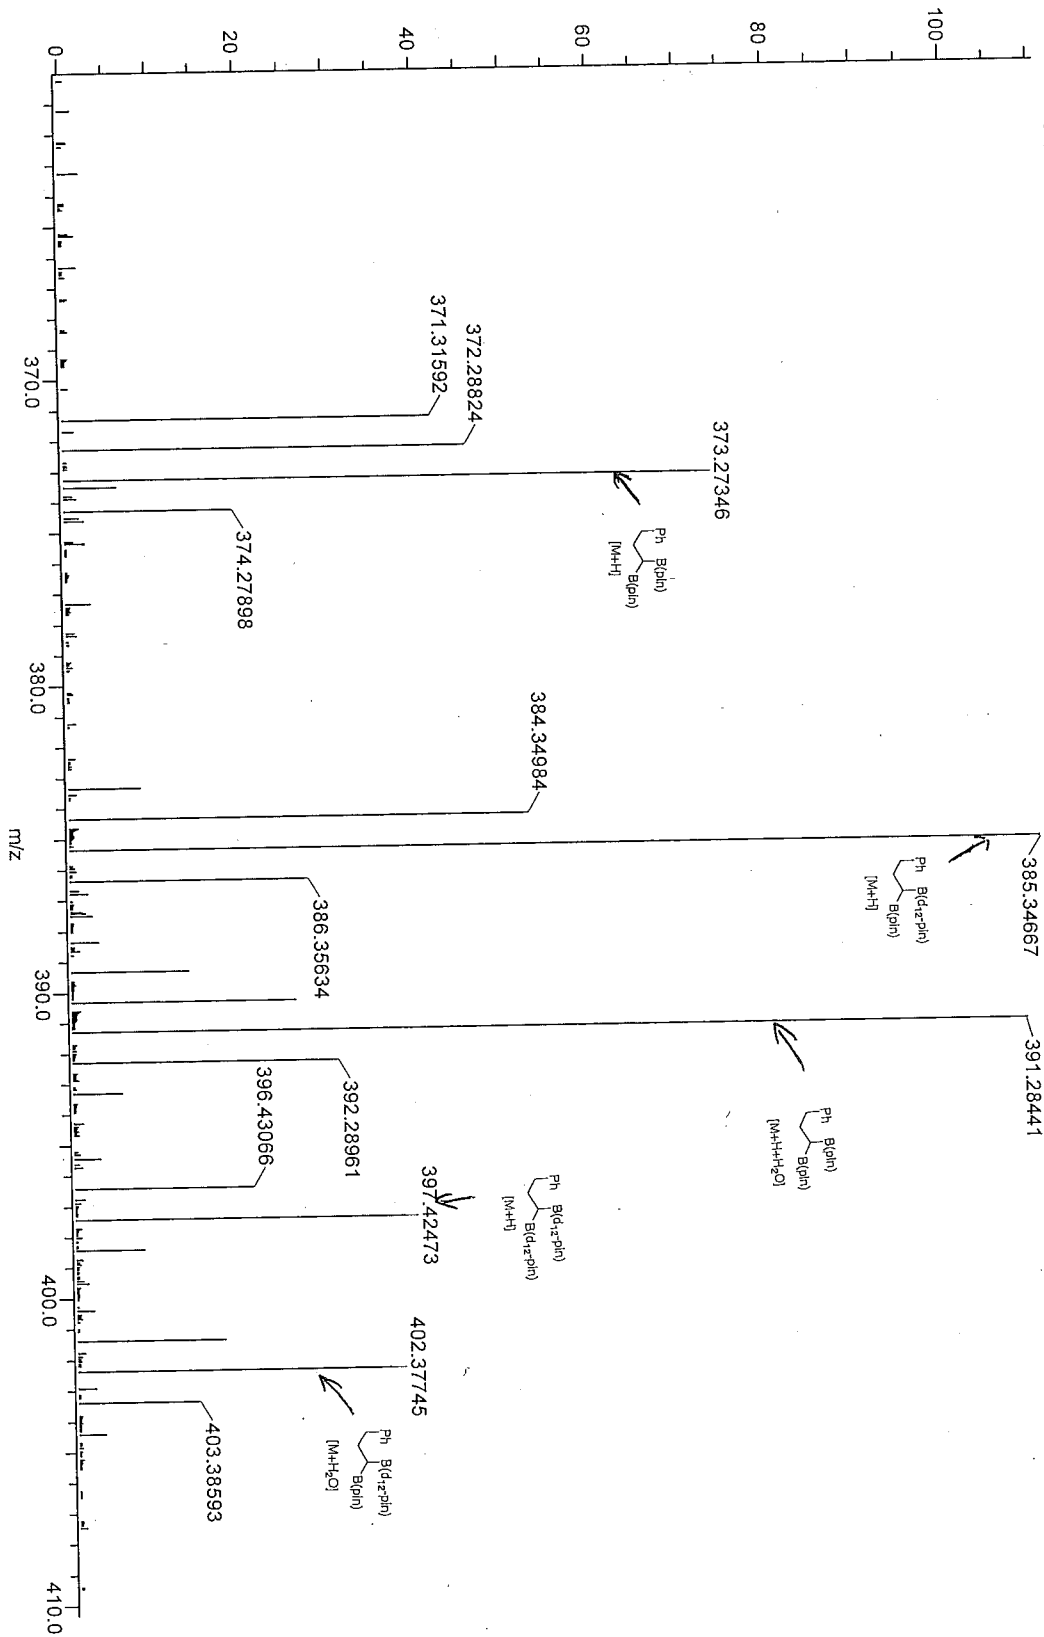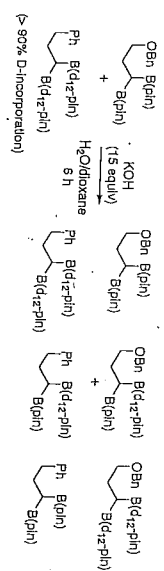

**B. Cross-over Experiment of germinal bis(boronates) under catalytic cross-coupling condition with 4-iodoanisole:**

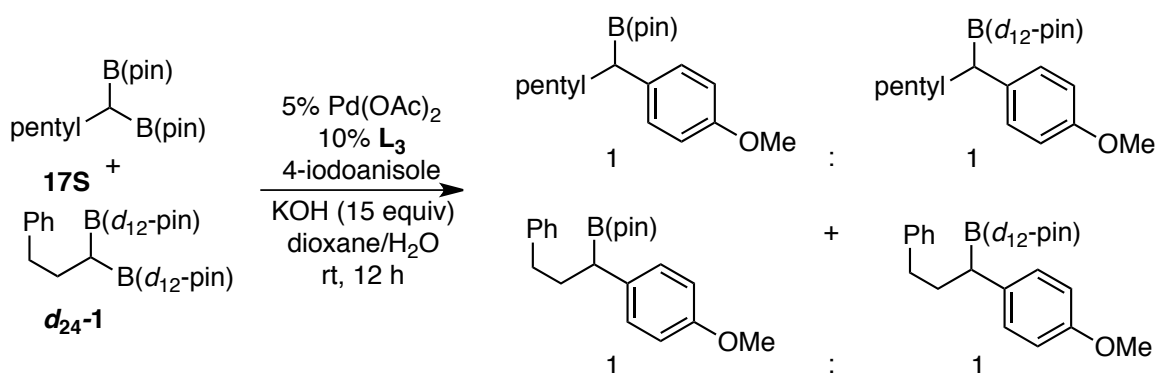

The standard cross-coupling procedure was followed with a mixture of boronates **d<sub>24</sub>-1** and **17S** and the mixture purified on silica gel with hexane/CH<sub>2</sub>Cl<sub>2</sub>.

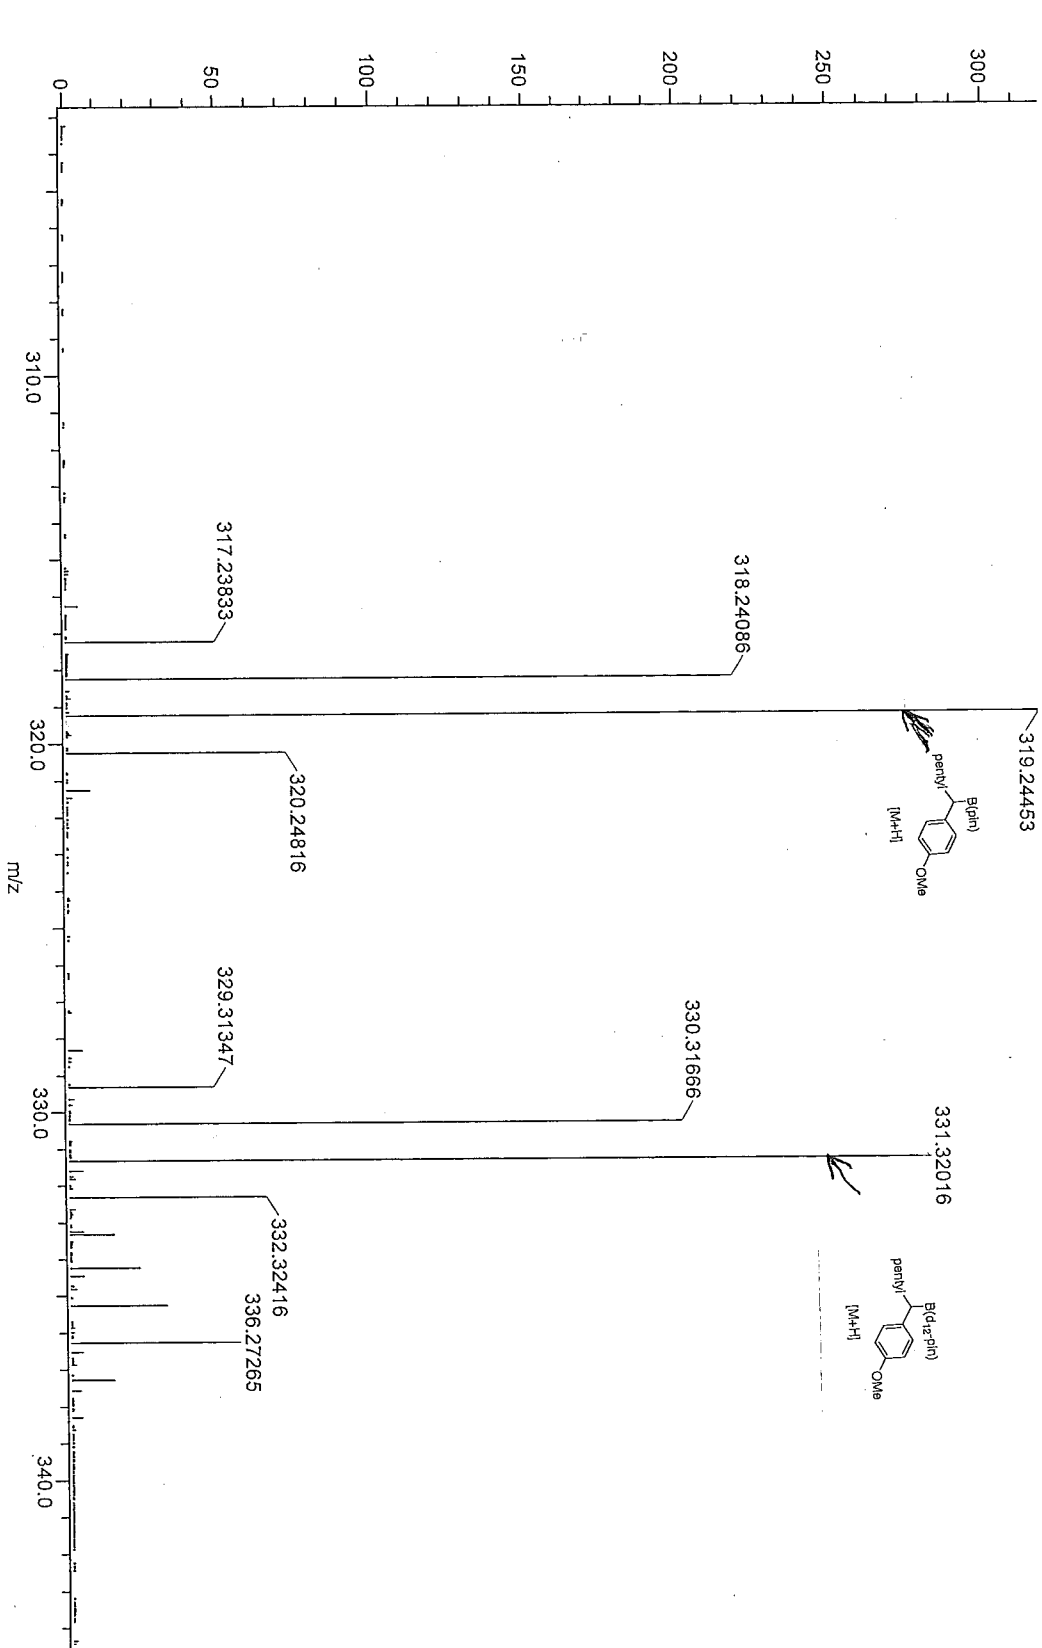

Acq. Data Name: cs2-249  
 Creation Parameters: Average(MS[1] Time:0.14..0.15)-1.0\*Average(MS[1] Time:0.03..0.12)  
 Comment: suncs\*SM\*cs2-249\*2-249\*morken  
 x10<sup>3</sup> Intensity (317590)

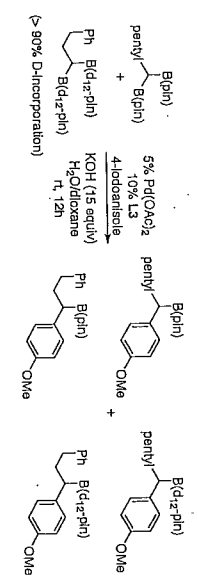

**C. Cross-over of benzyl boronate products under basic condition:**

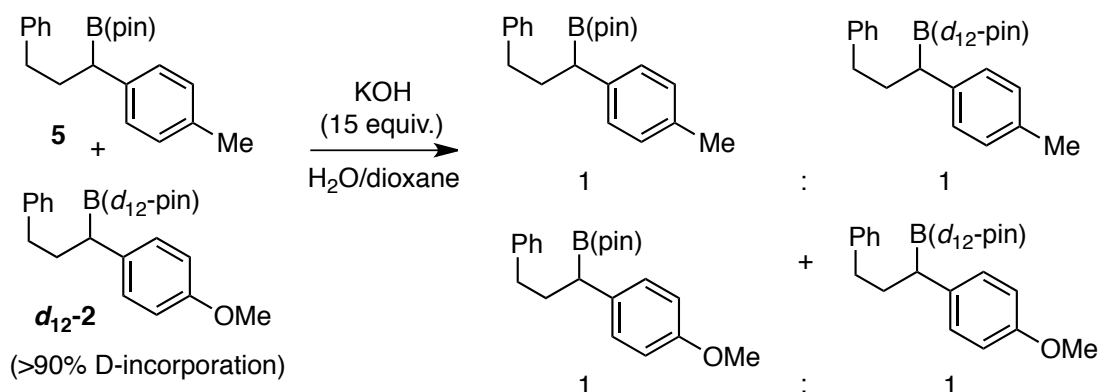

Boronate **5** (9.2 mg, 0.027 mmol) was mixed with **2-d<sub>12</sub>** (10 mg, 0.027 mmol) in 0.11 mL dioxane and 0.1 mL of KOH (8M) and stirred for 12 hours. Then ether was added and the mixture filtered through silica gel prior to purification by silica gel chromatography to furnish labeled **5** (8 mg) and labeled **2** (8.5 mg).

Acq. Data Name: cs-li-242-1-1  
 Creation Parameters: Average(MS[1] Time:0.14..0.15)-1.0\*Average(MS[1] Time:0.03..0.11)  
 Comment: potterbo\*CC\*cs-li-242-1-1\*2-242\*mkorken  
 x10<sup>3</sup> Intensity (182110)

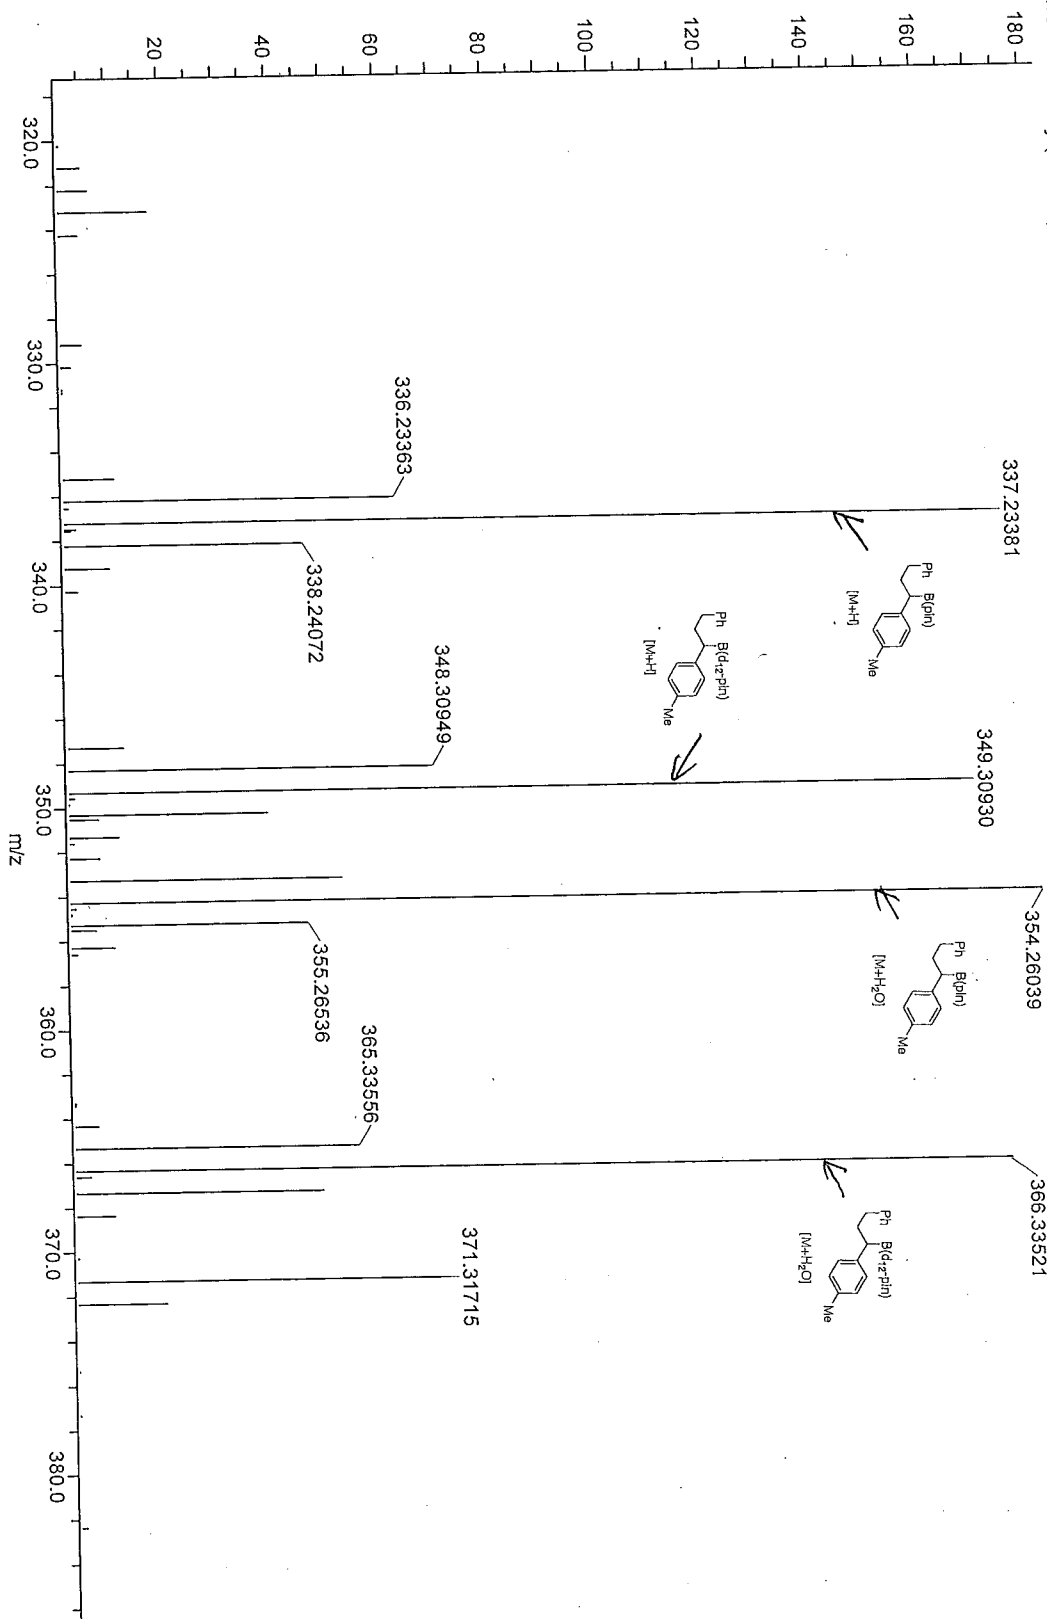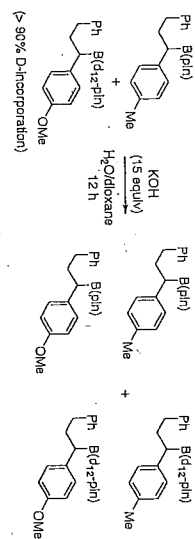

Acq. Data Name: cs-II-242-2-1  
 Creation Parameters: Average(MS[1]) Time:0.14.0.16)-1.0-Average(MS[1]) Time:0.04.0.13)  
 Comment: potterbo\*CC\*cs-II-242-2-1\*2-242\*morken  
 x10<sup>3</sup> Intensity (179400)

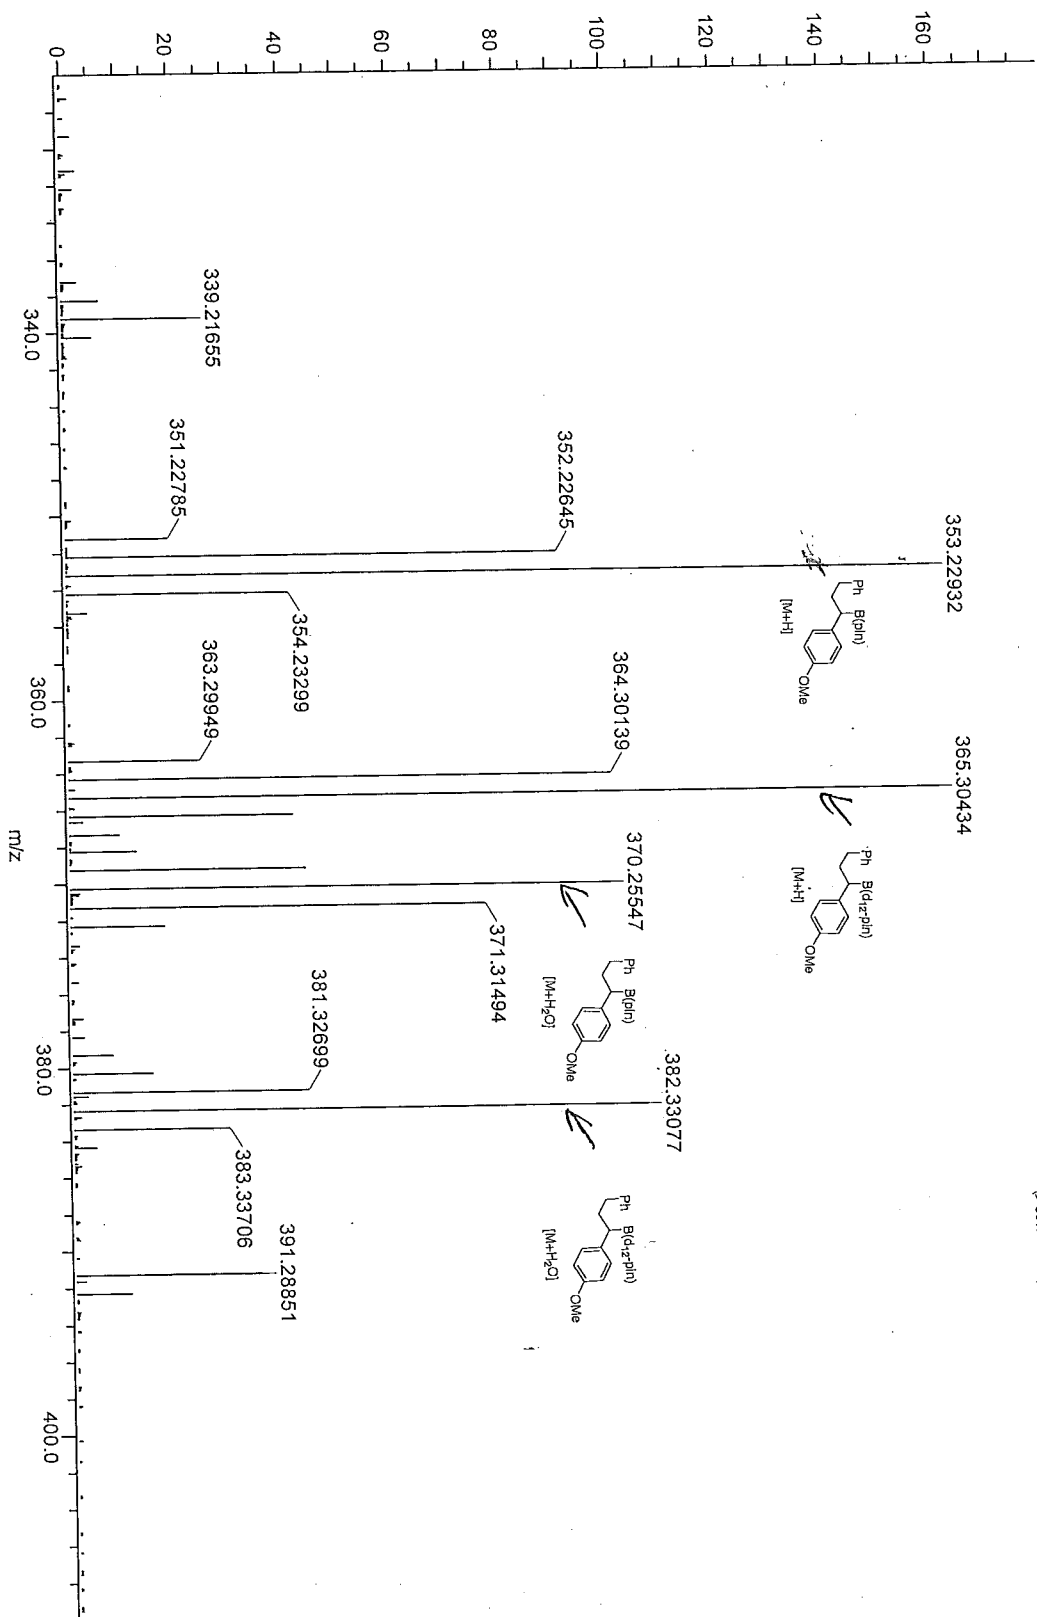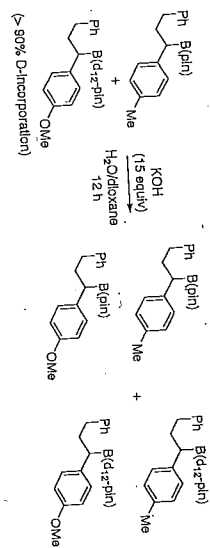

# $^1\text{H}$ and $^{13}\text{C}$ NMR

## Spectral Data

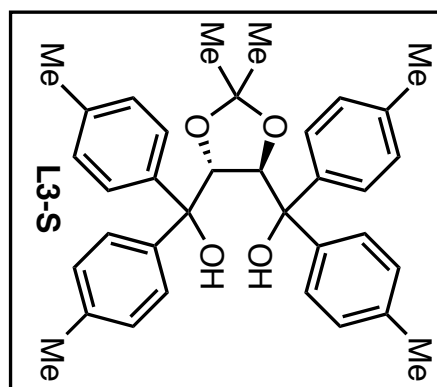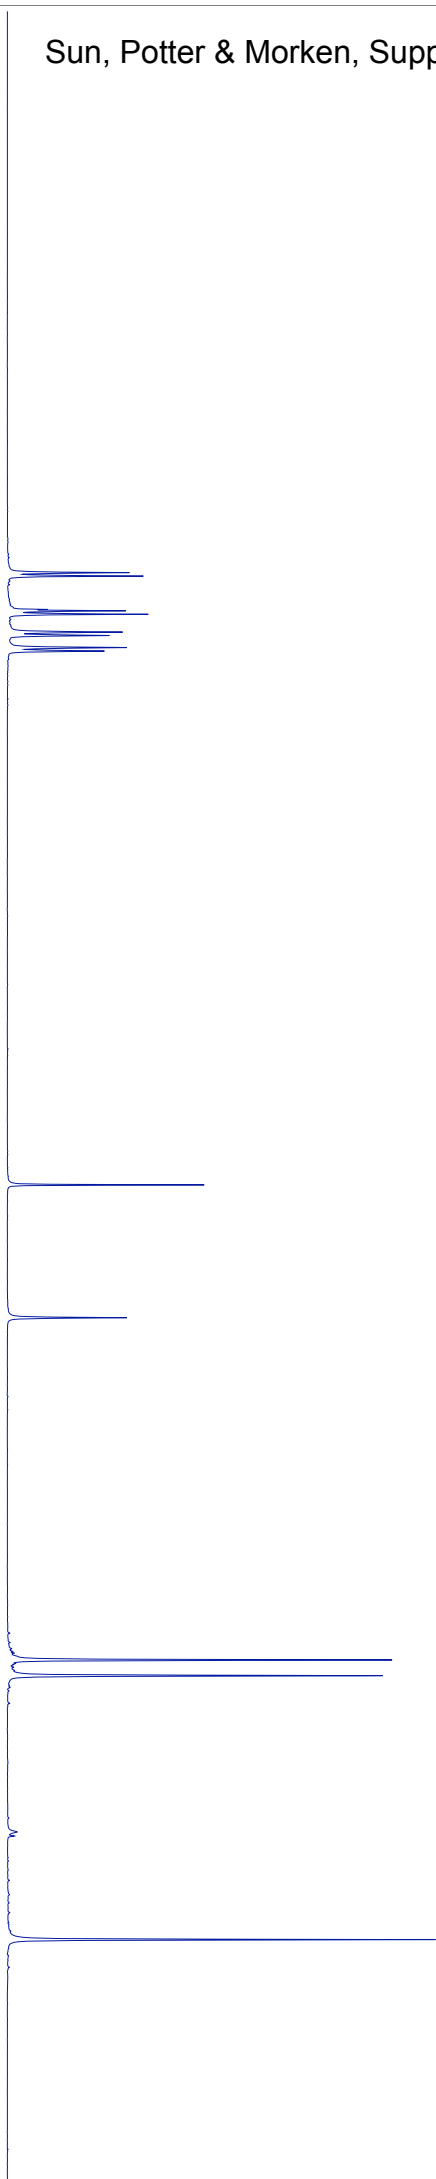



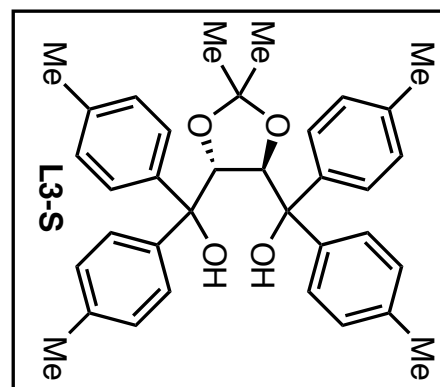

ppm 200  
180  
160  
140  
120  
100  
80  
60  
40  
20  
0

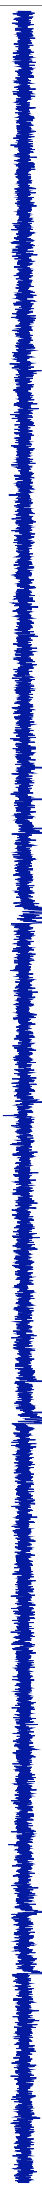

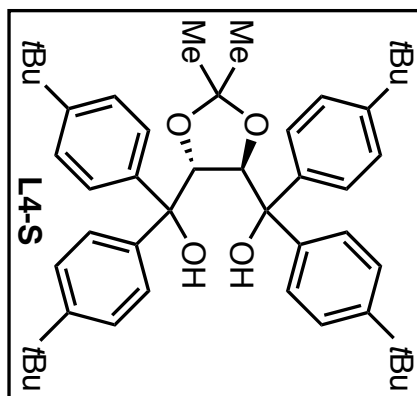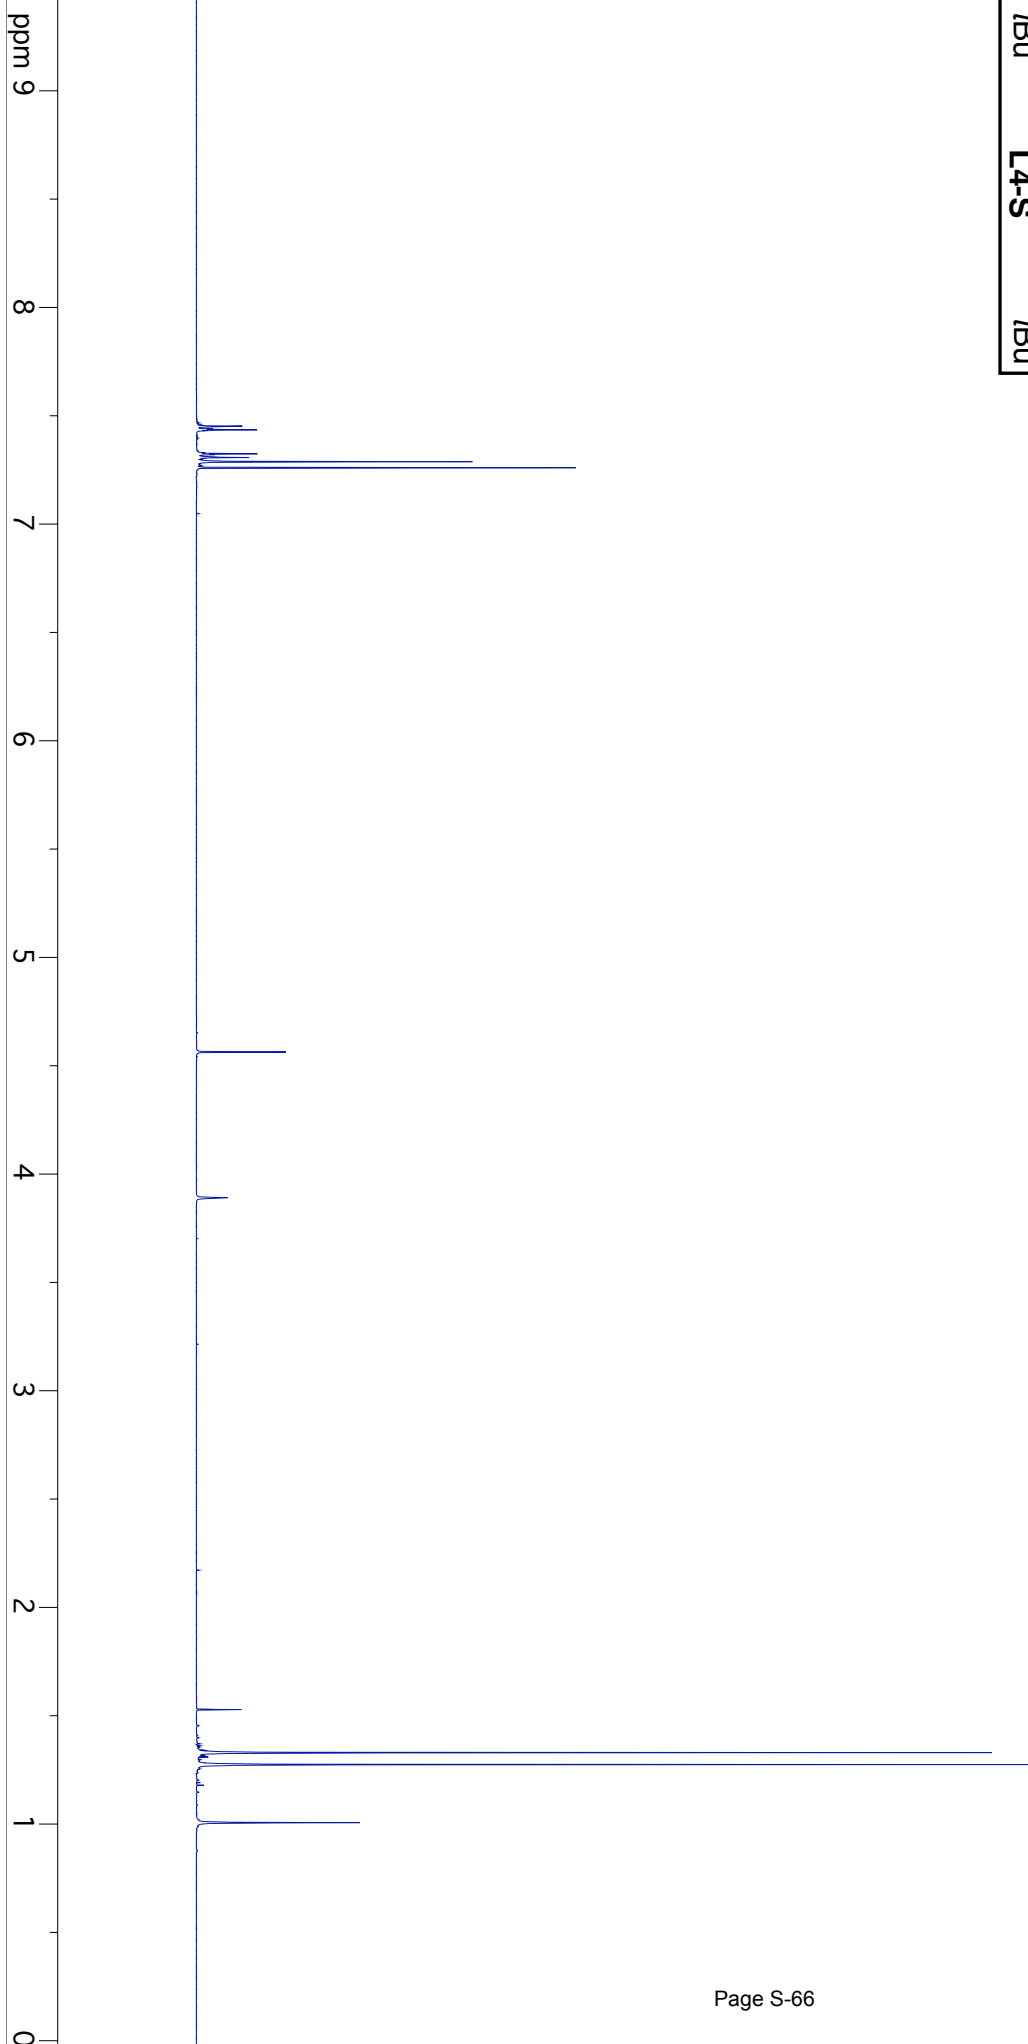

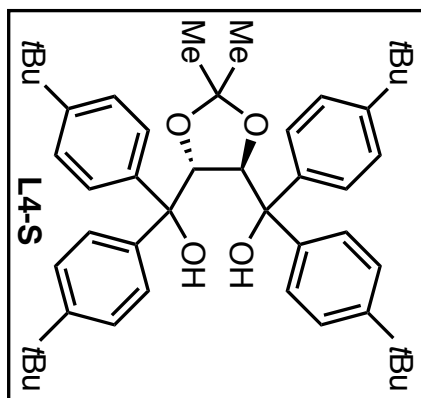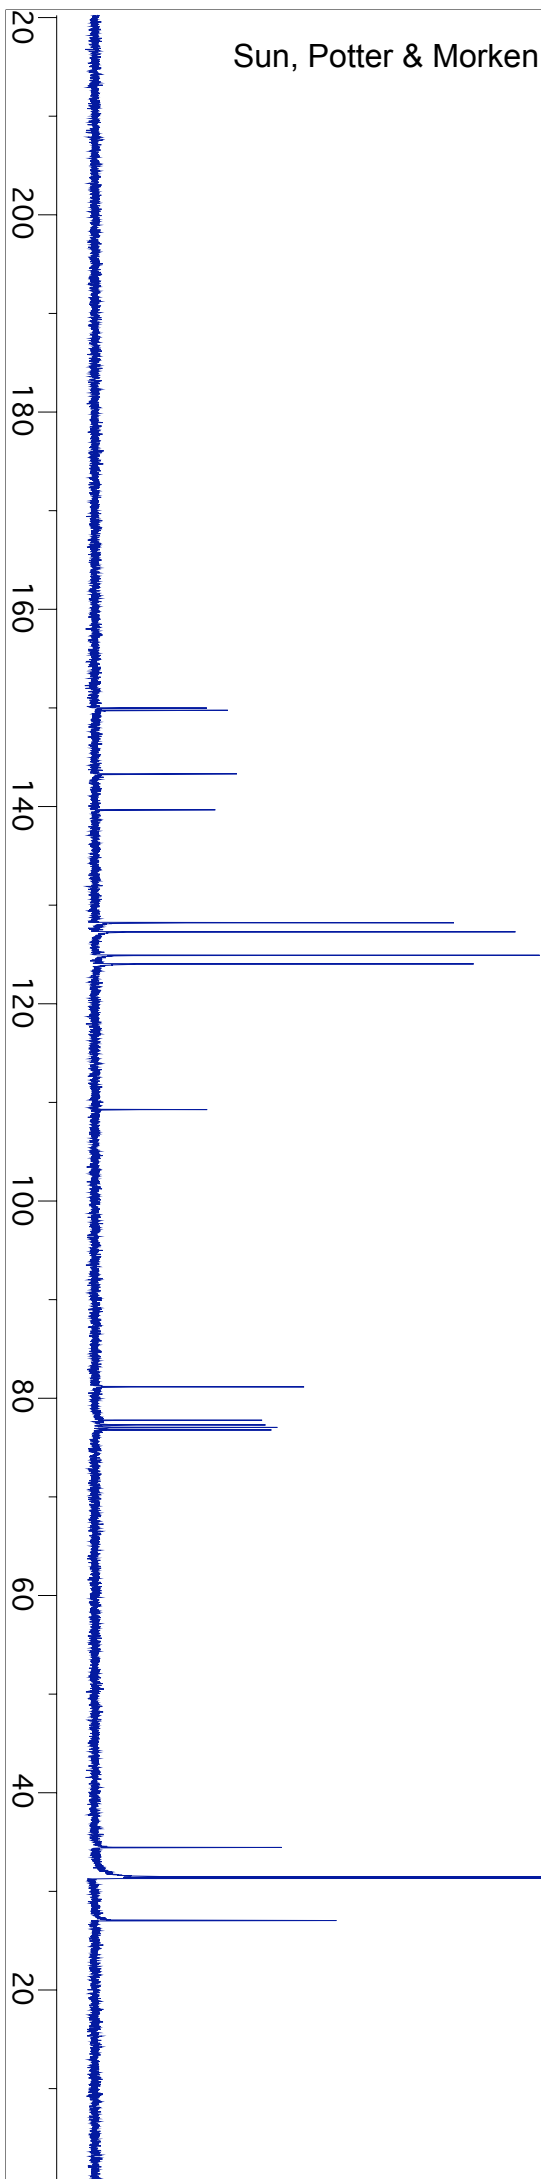

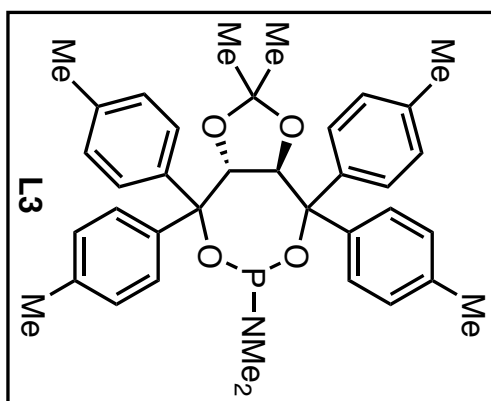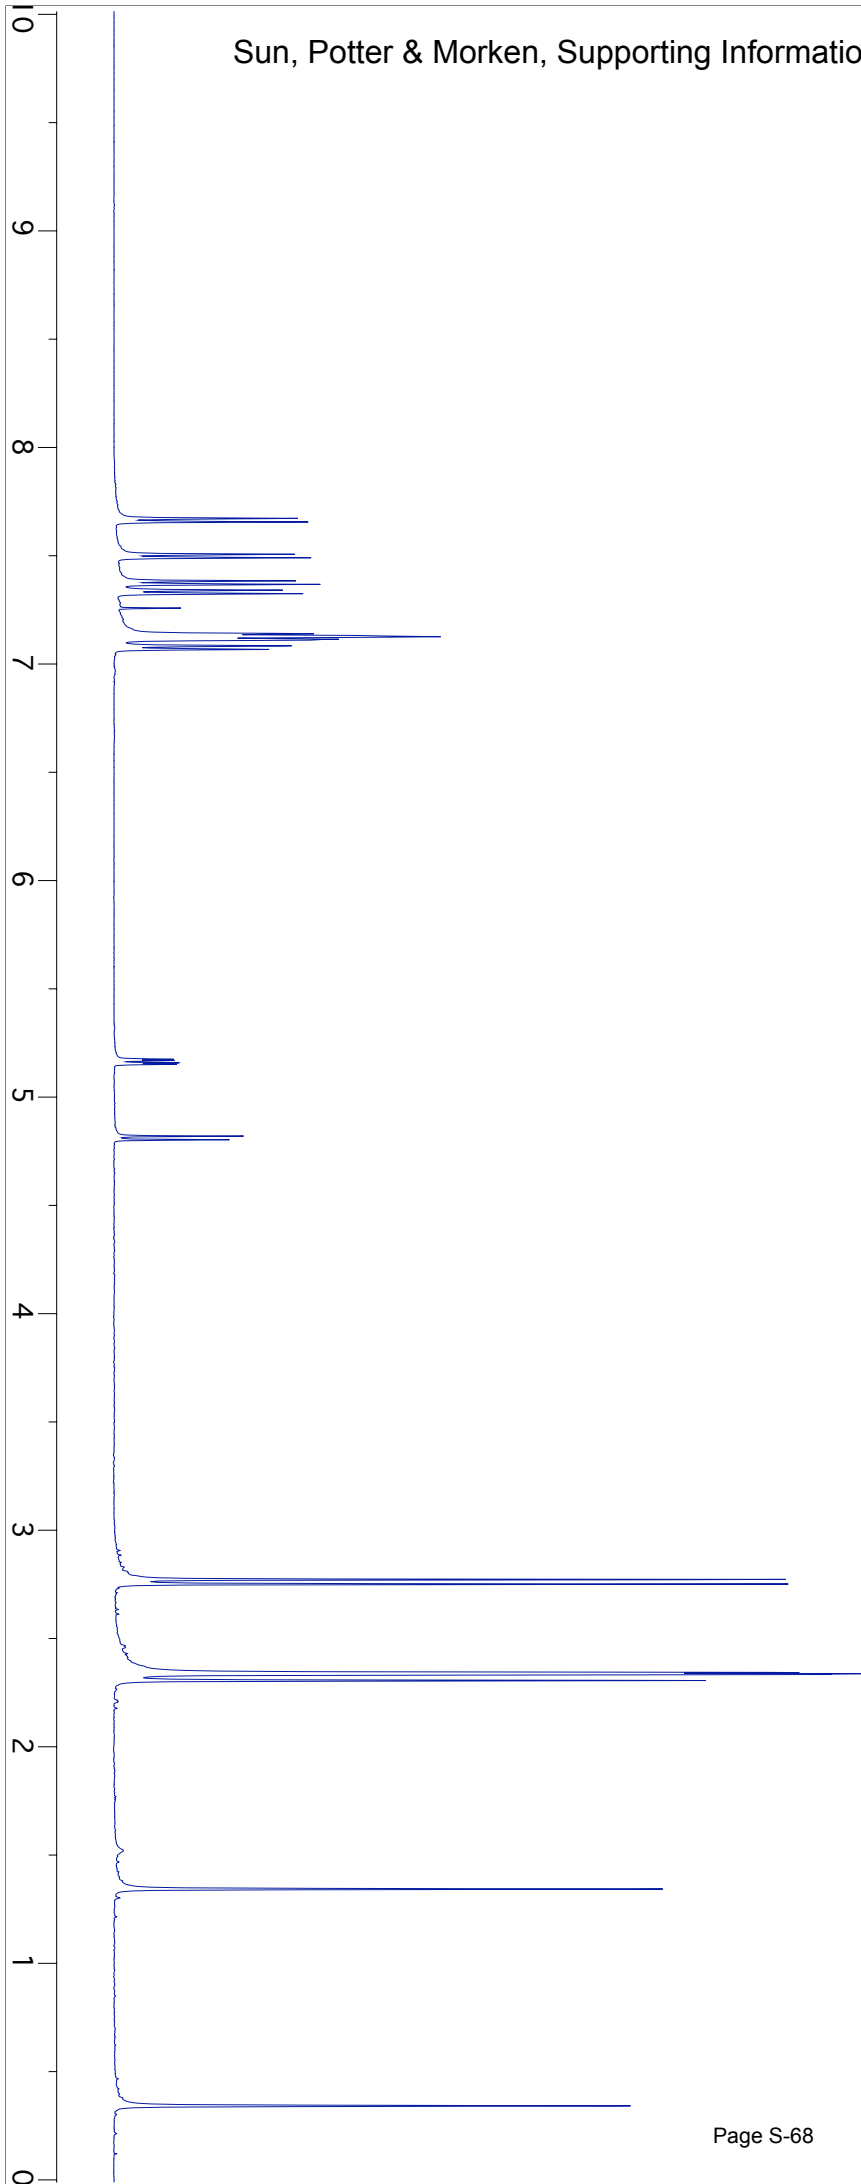



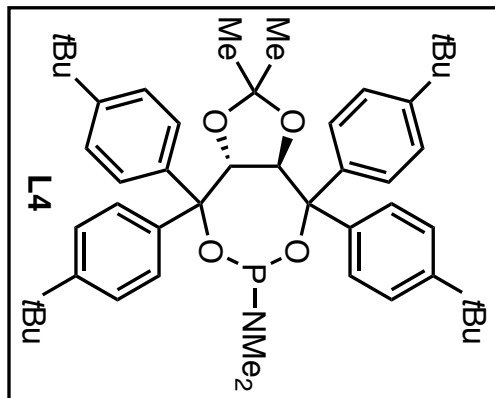

14  
13  
12  
11  
10  
9  
8  
7  
6  
5  
4  
3  
2  
1  
0  
-1  
-2

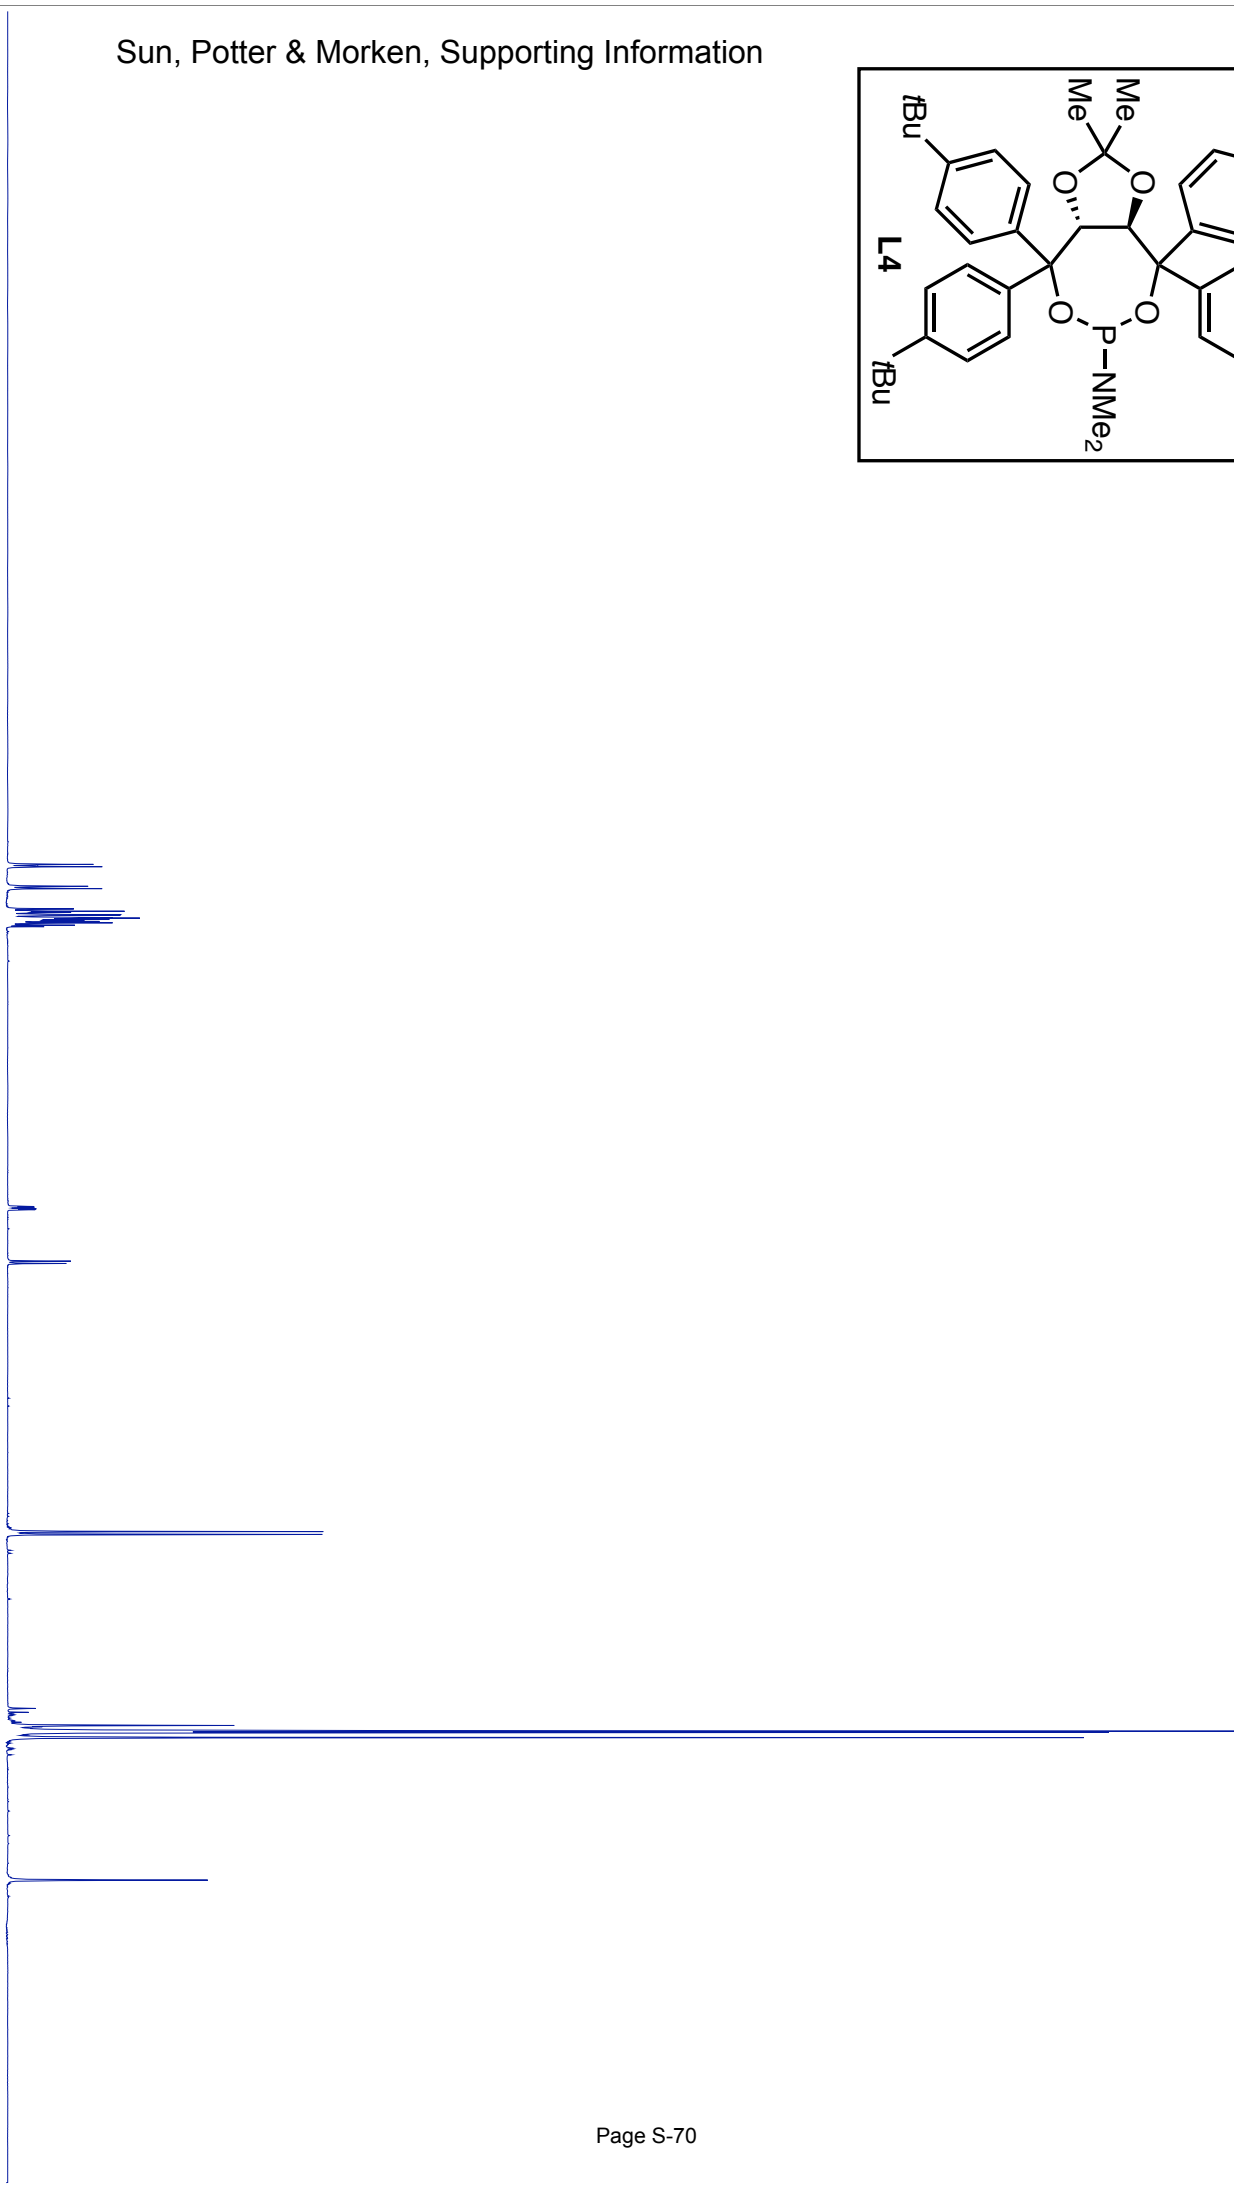

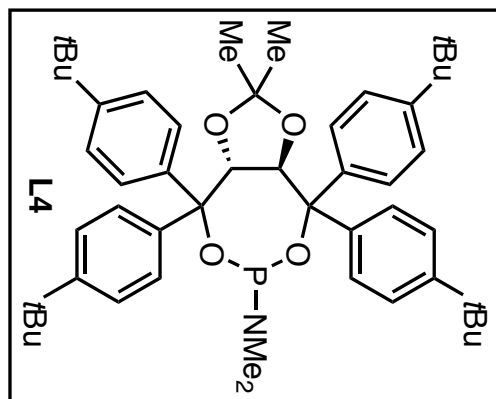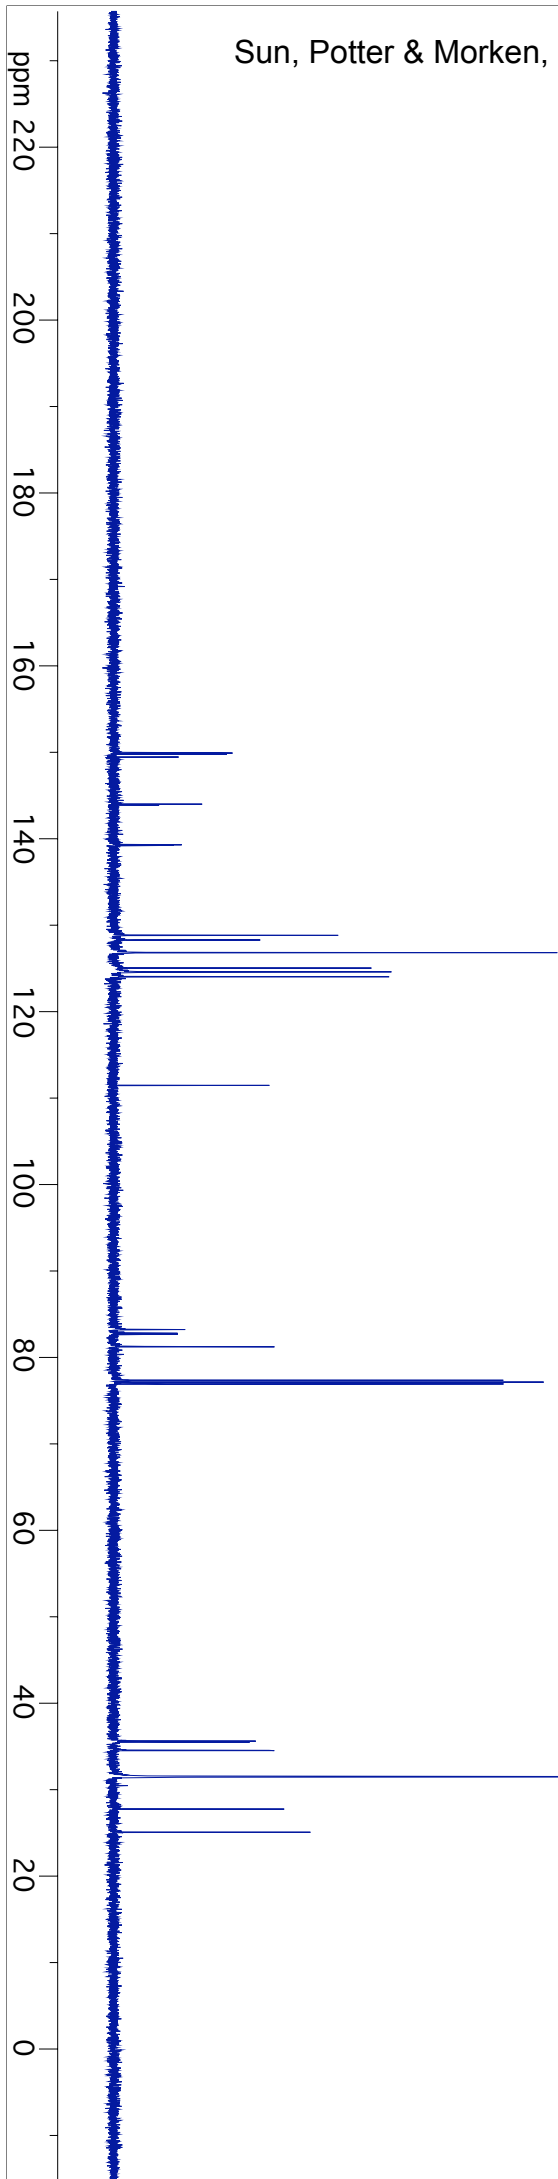

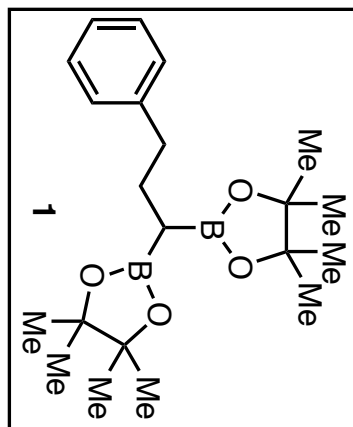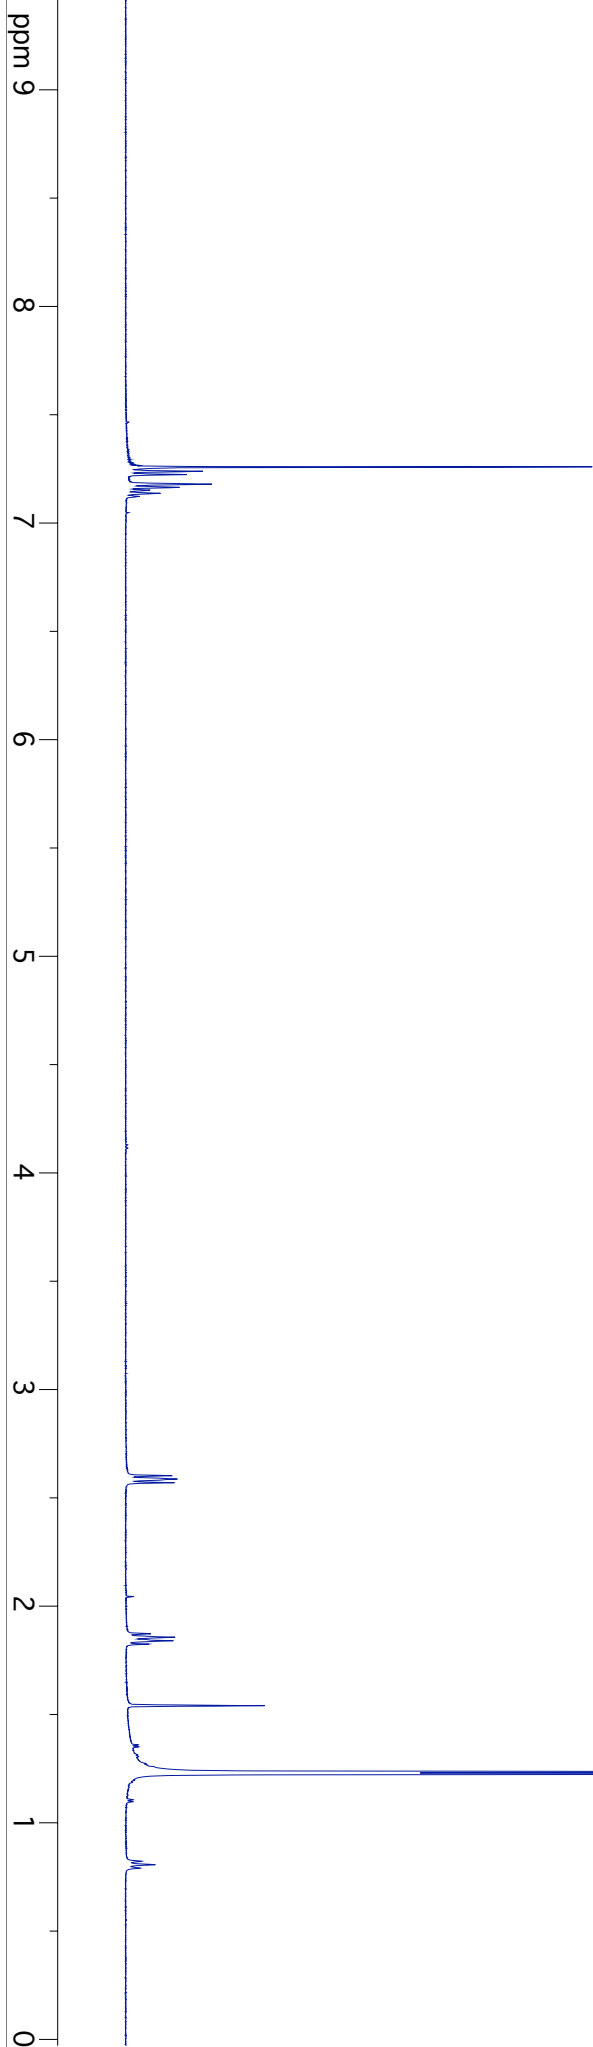



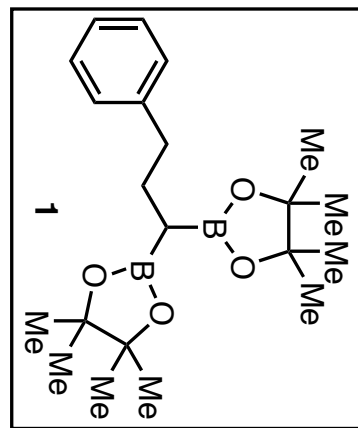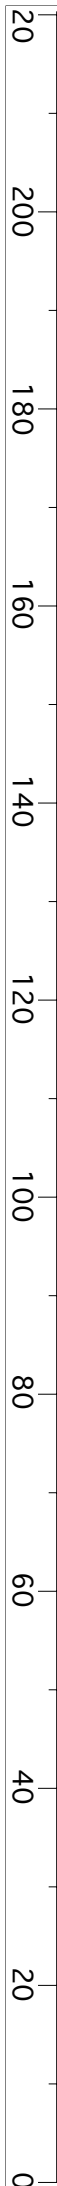



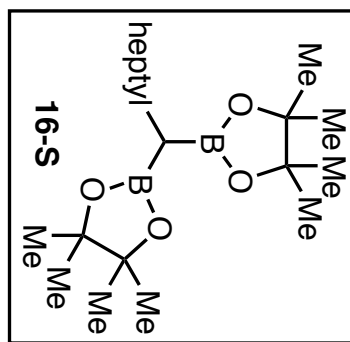

ppm 200  
180  
160  
140  
120  
100  
80  
60  
40  
20  
0

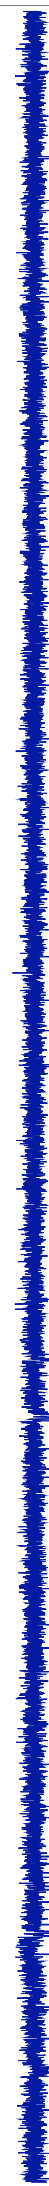

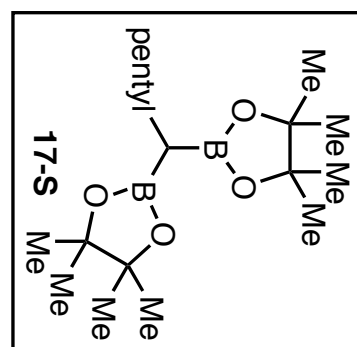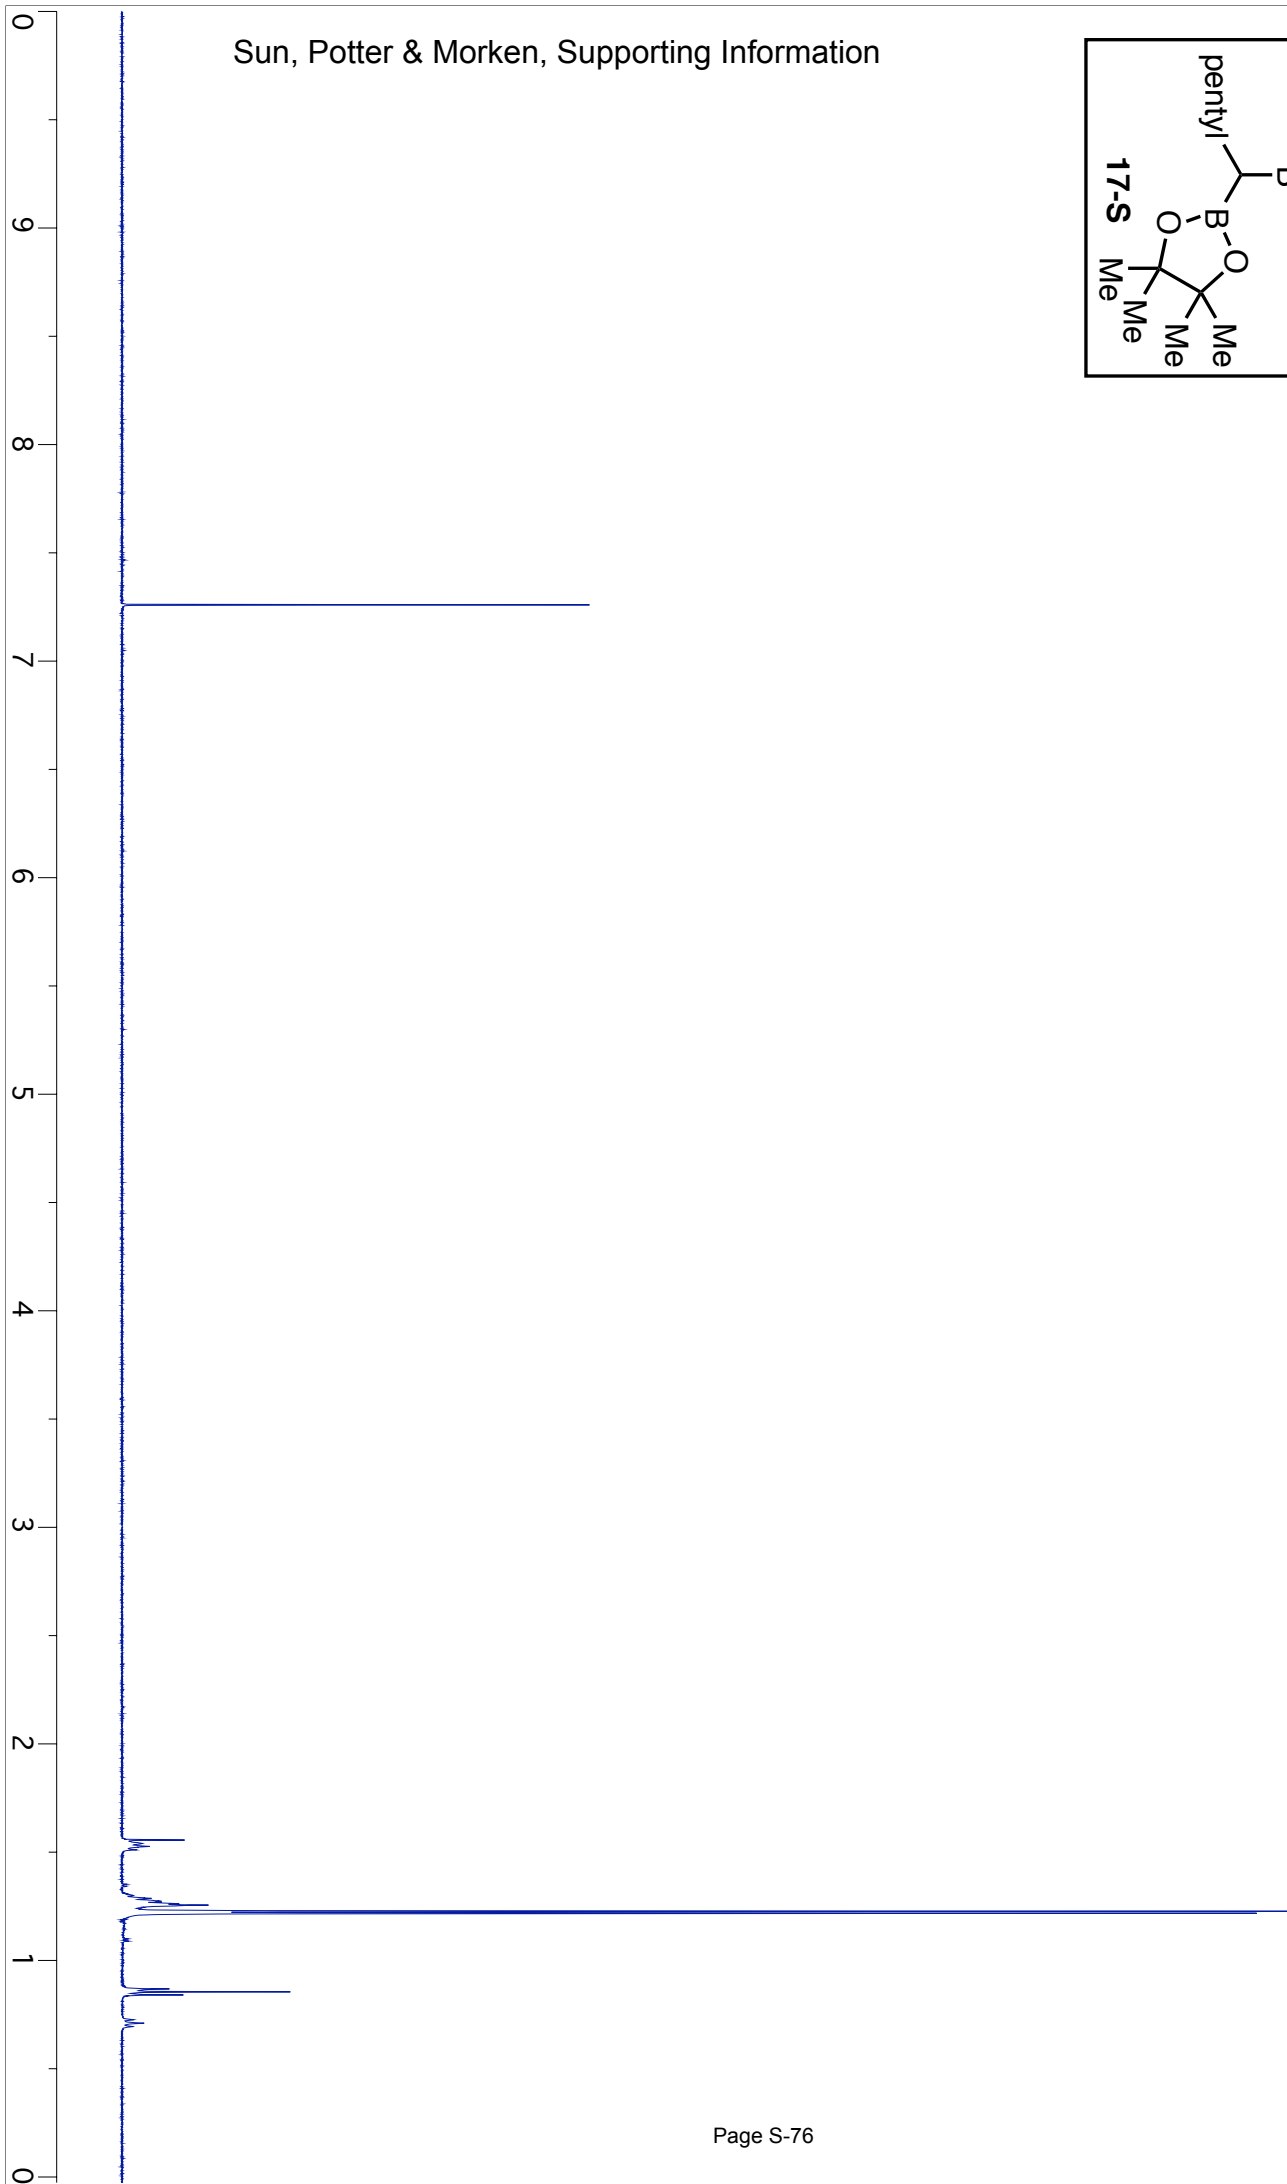

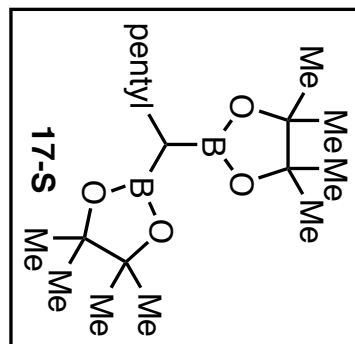

ppm 200  
180  
160  
140  
120  
100  
80  
60  
40  
20

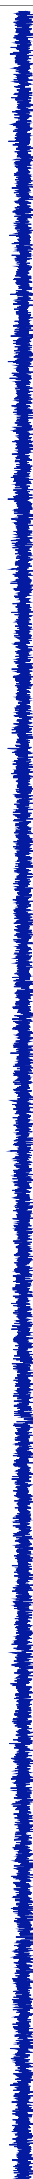

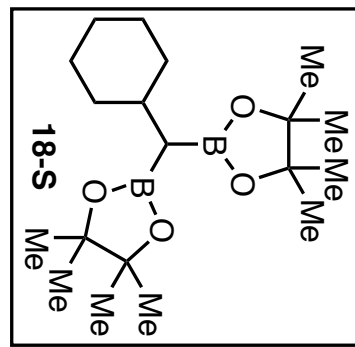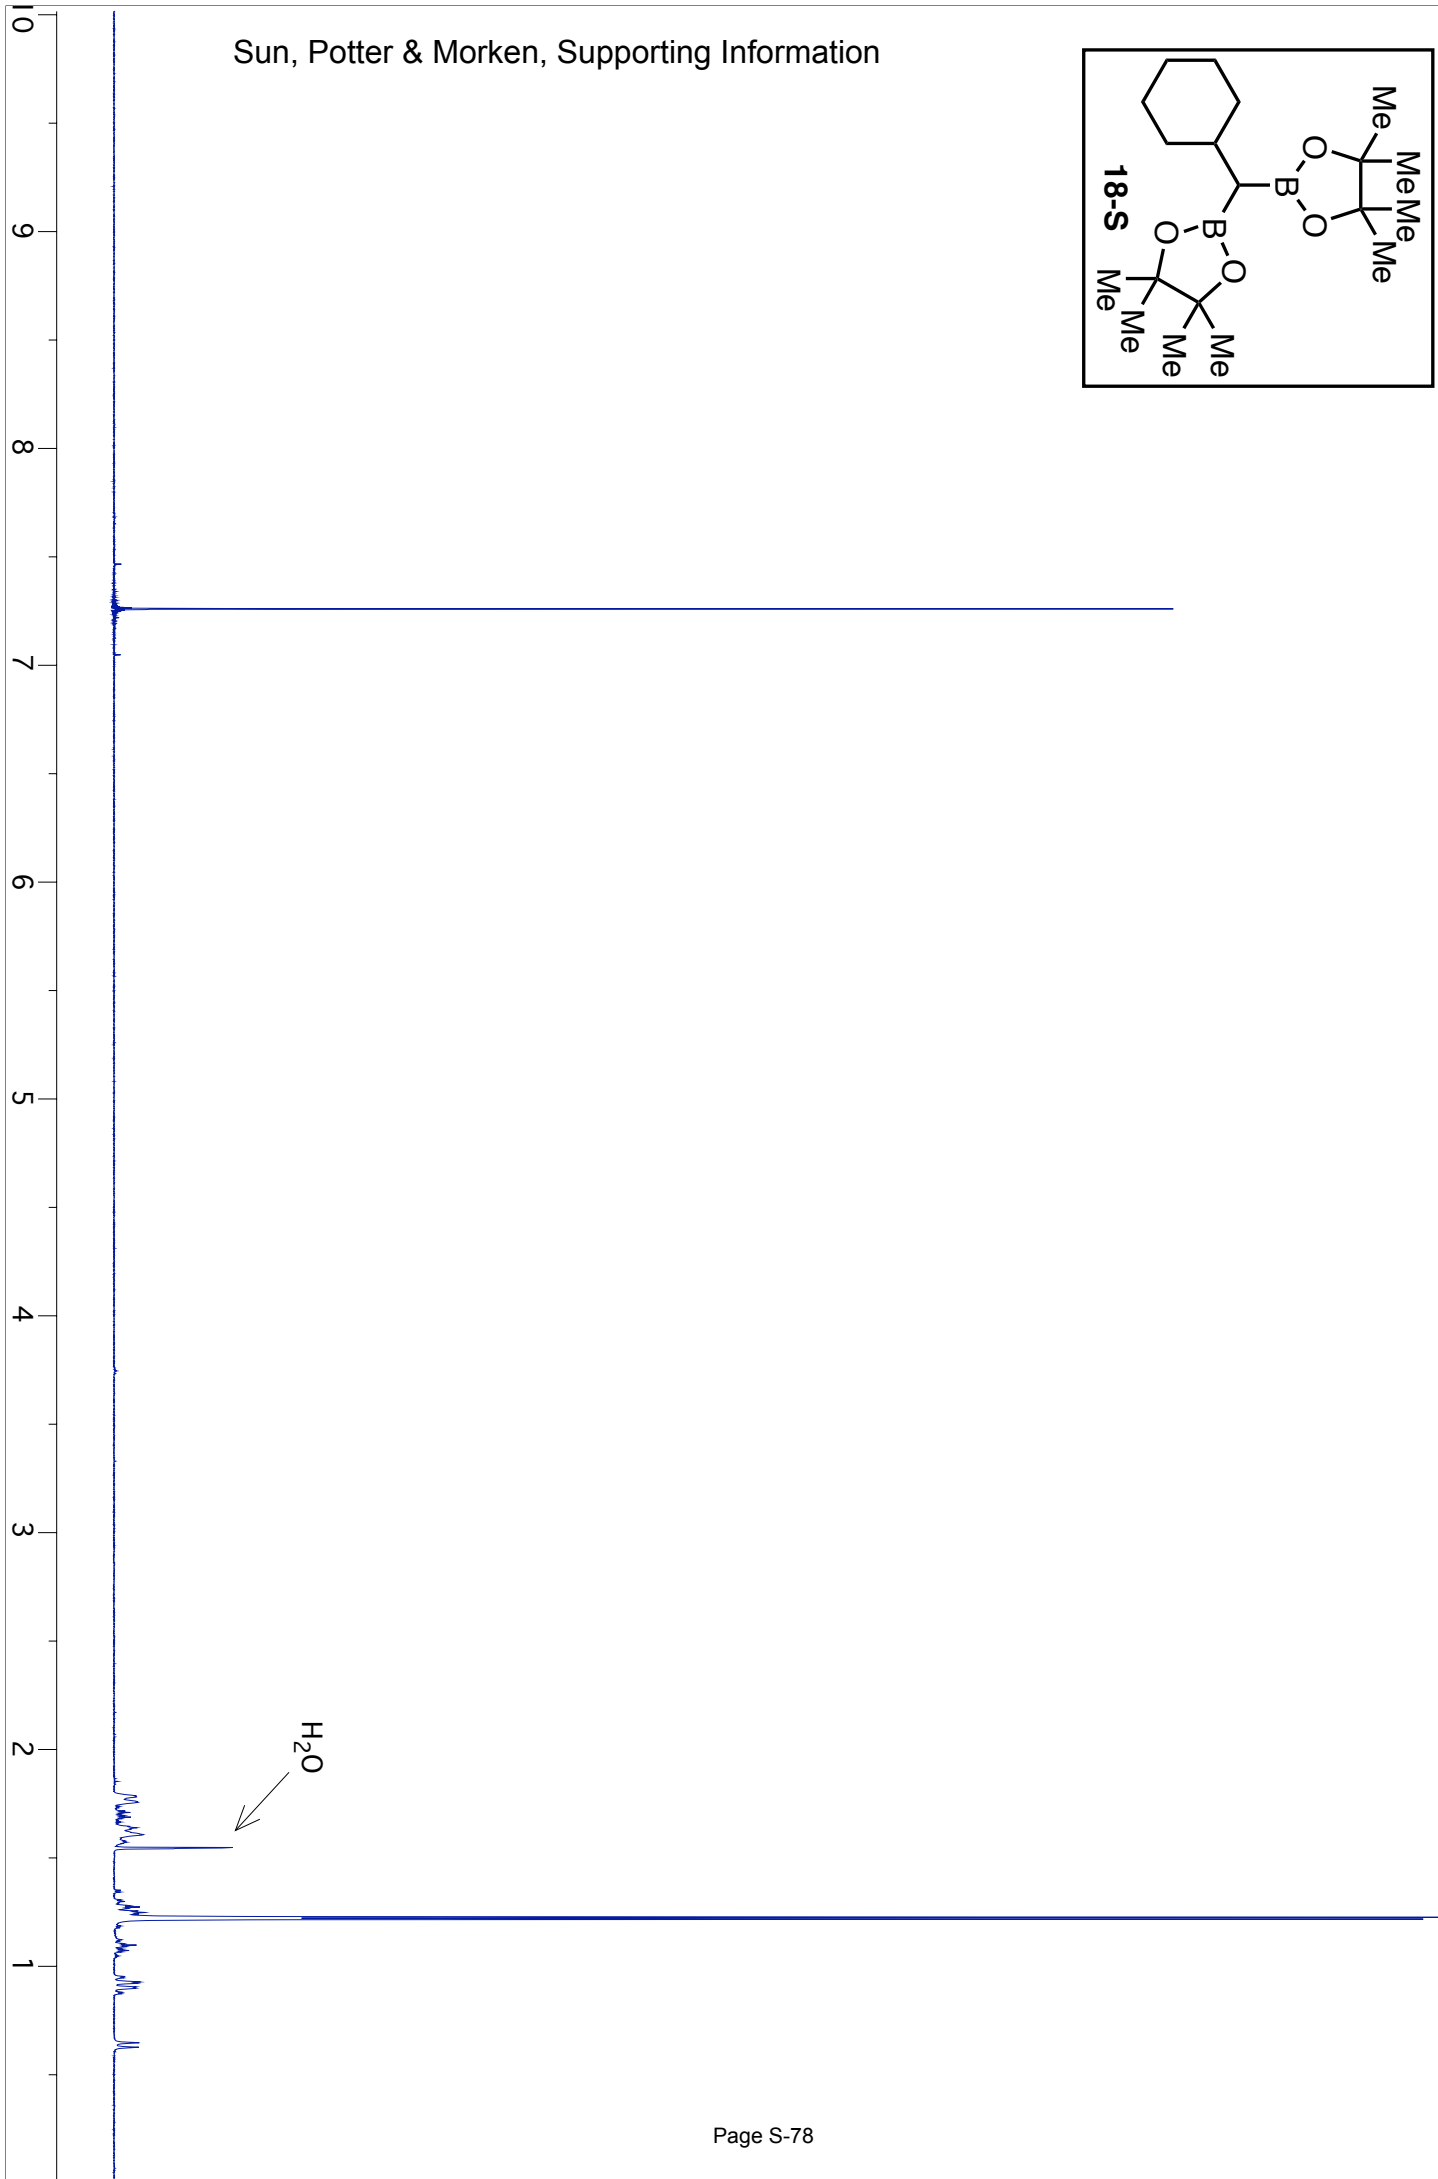

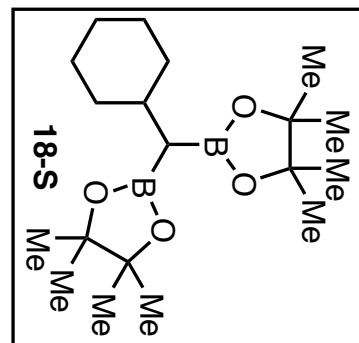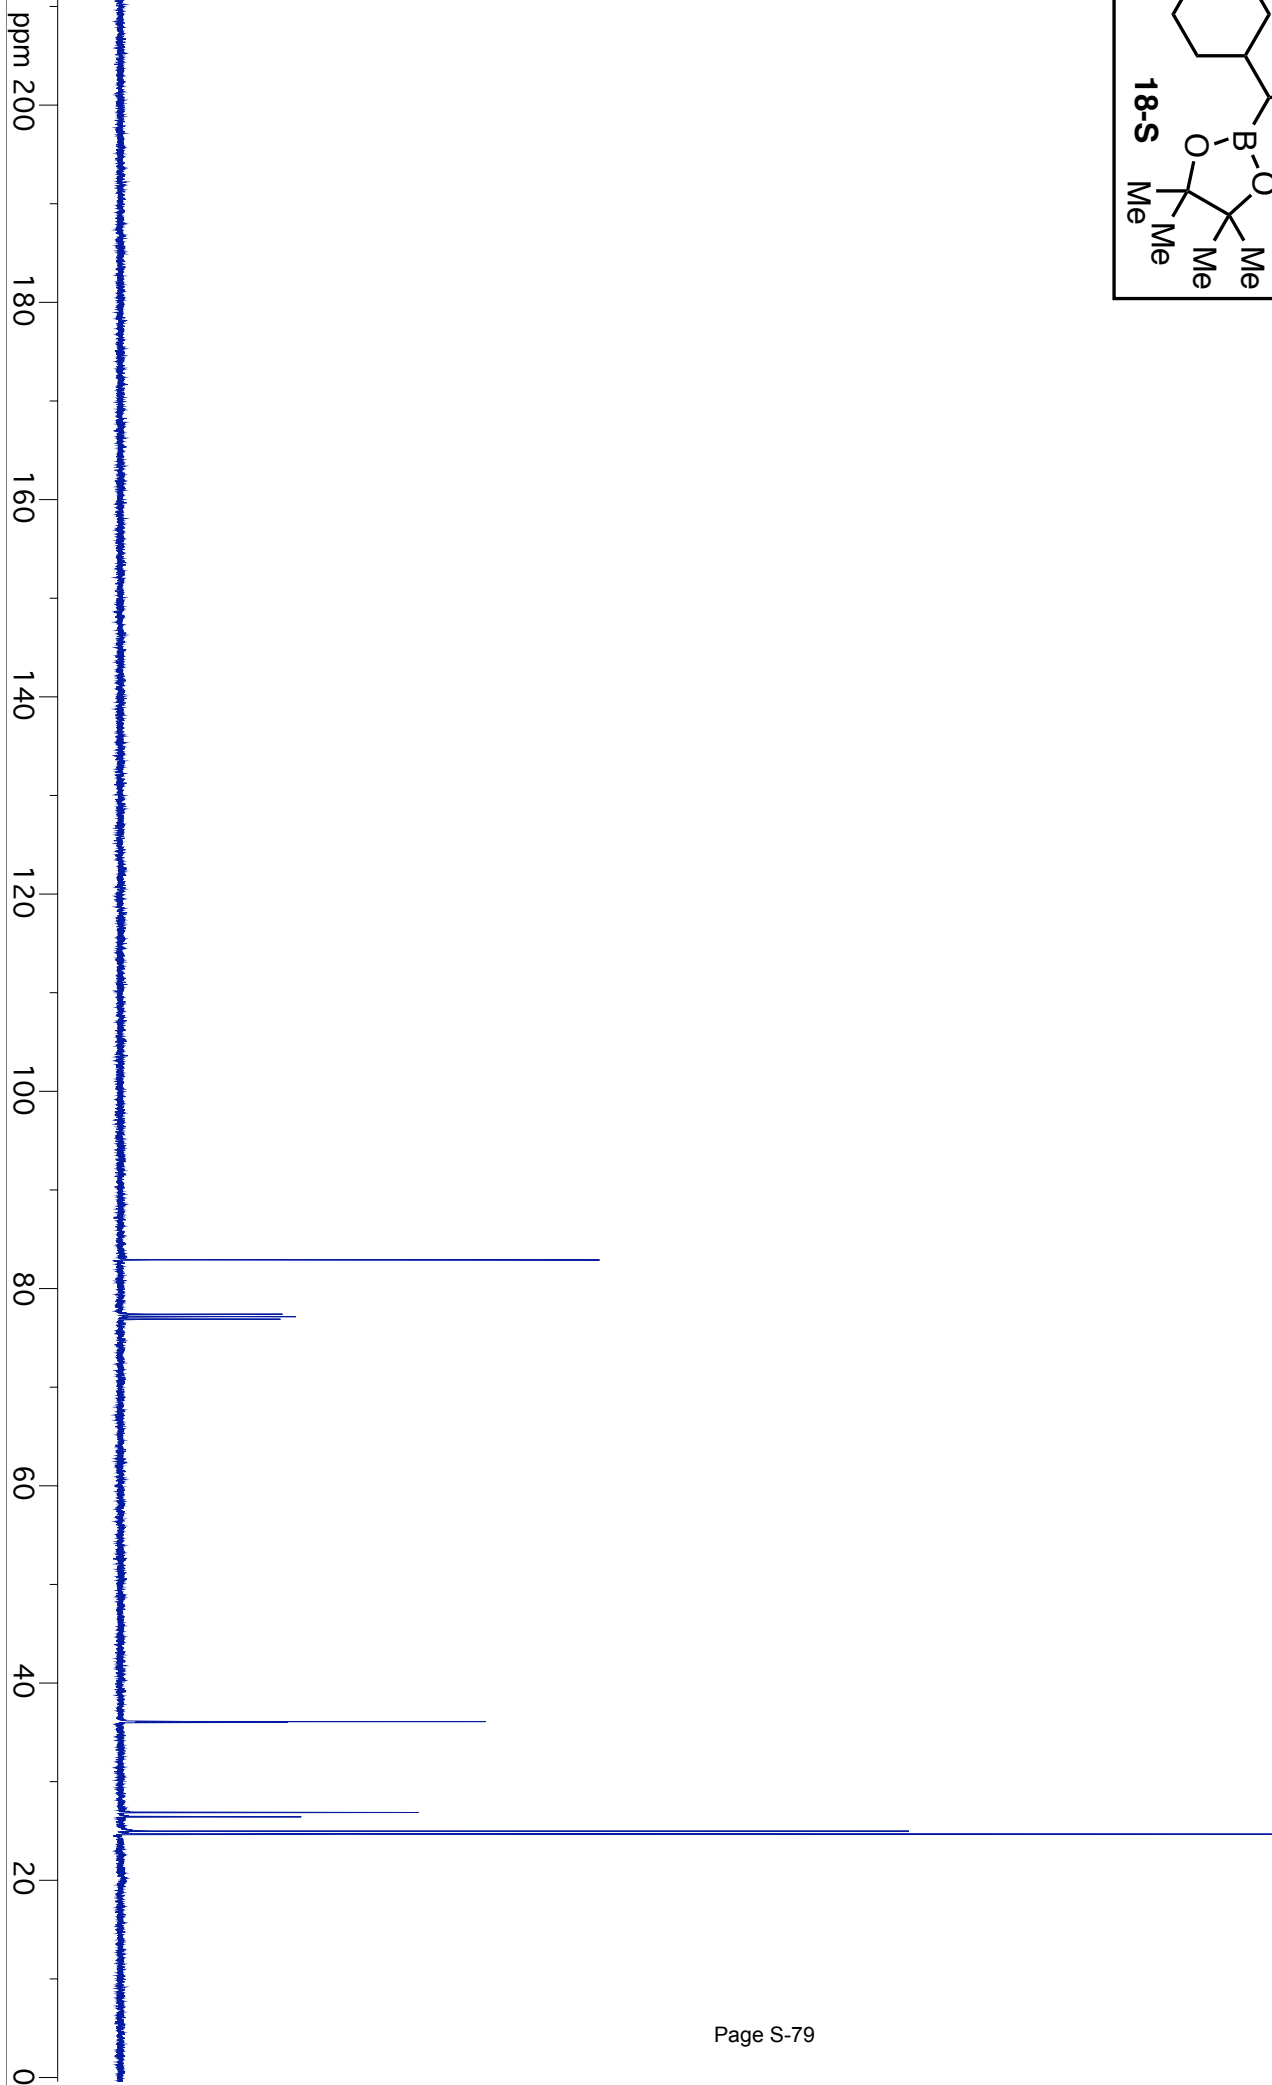

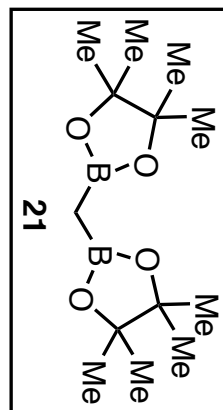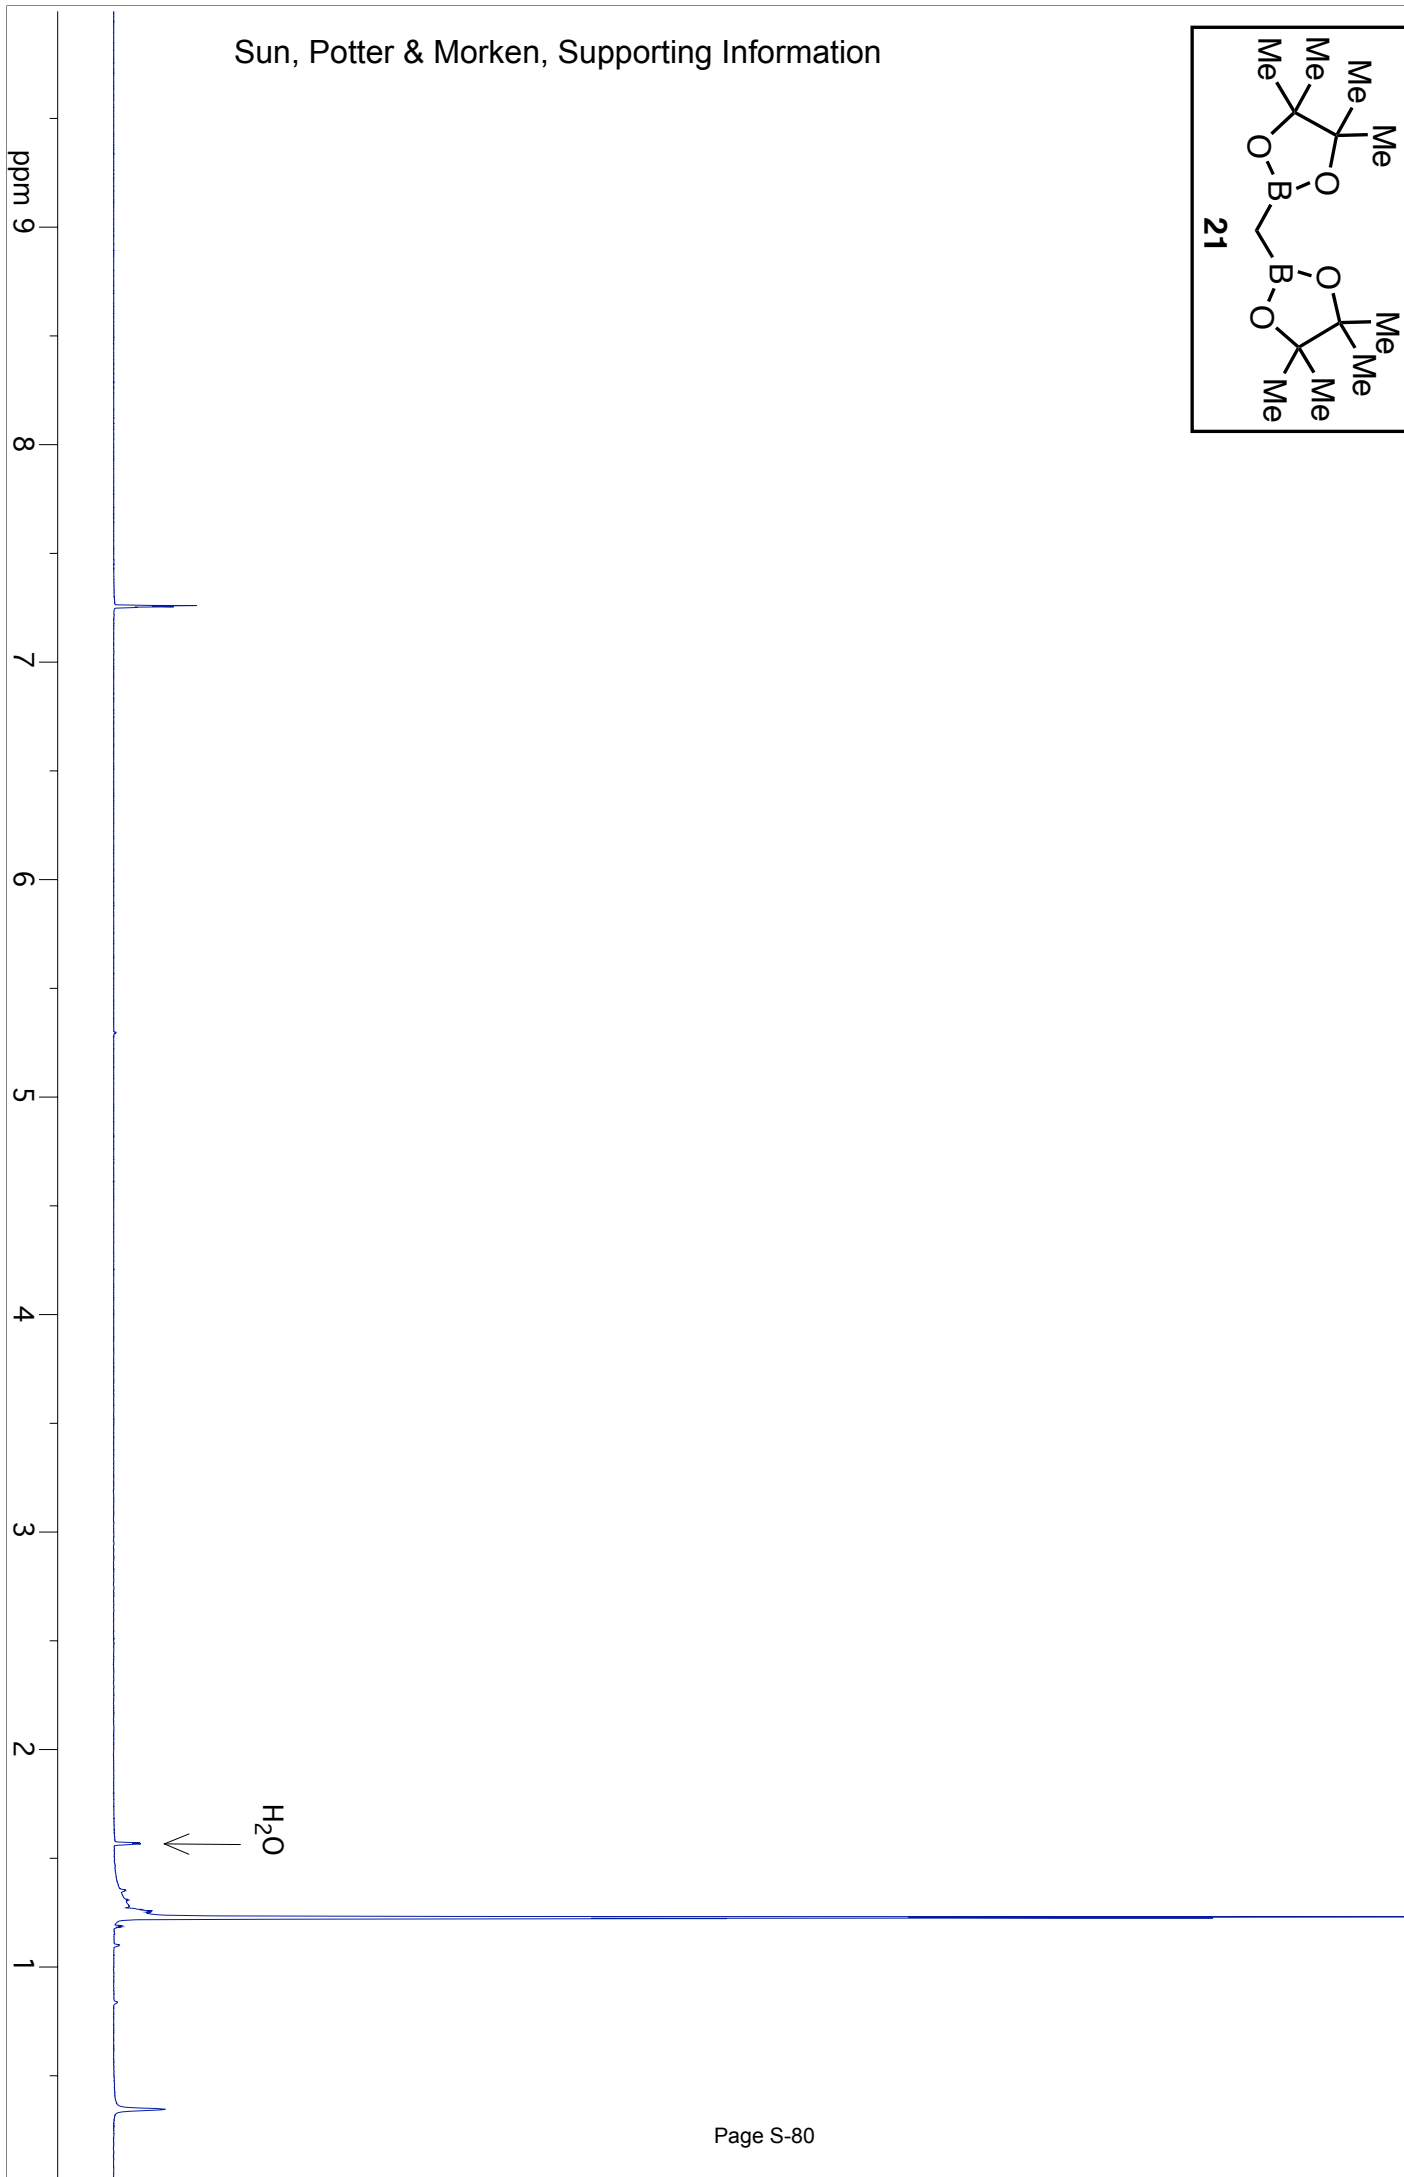



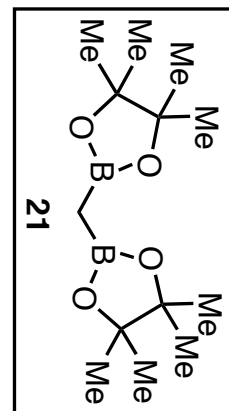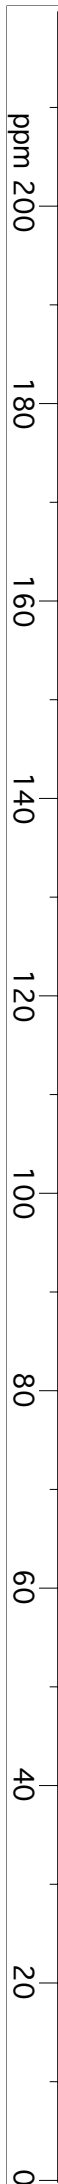

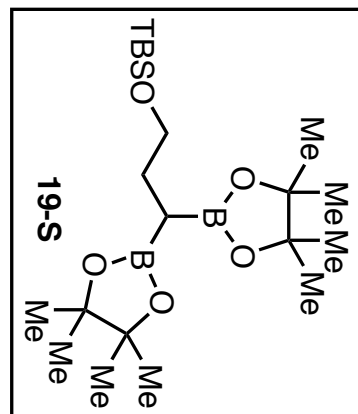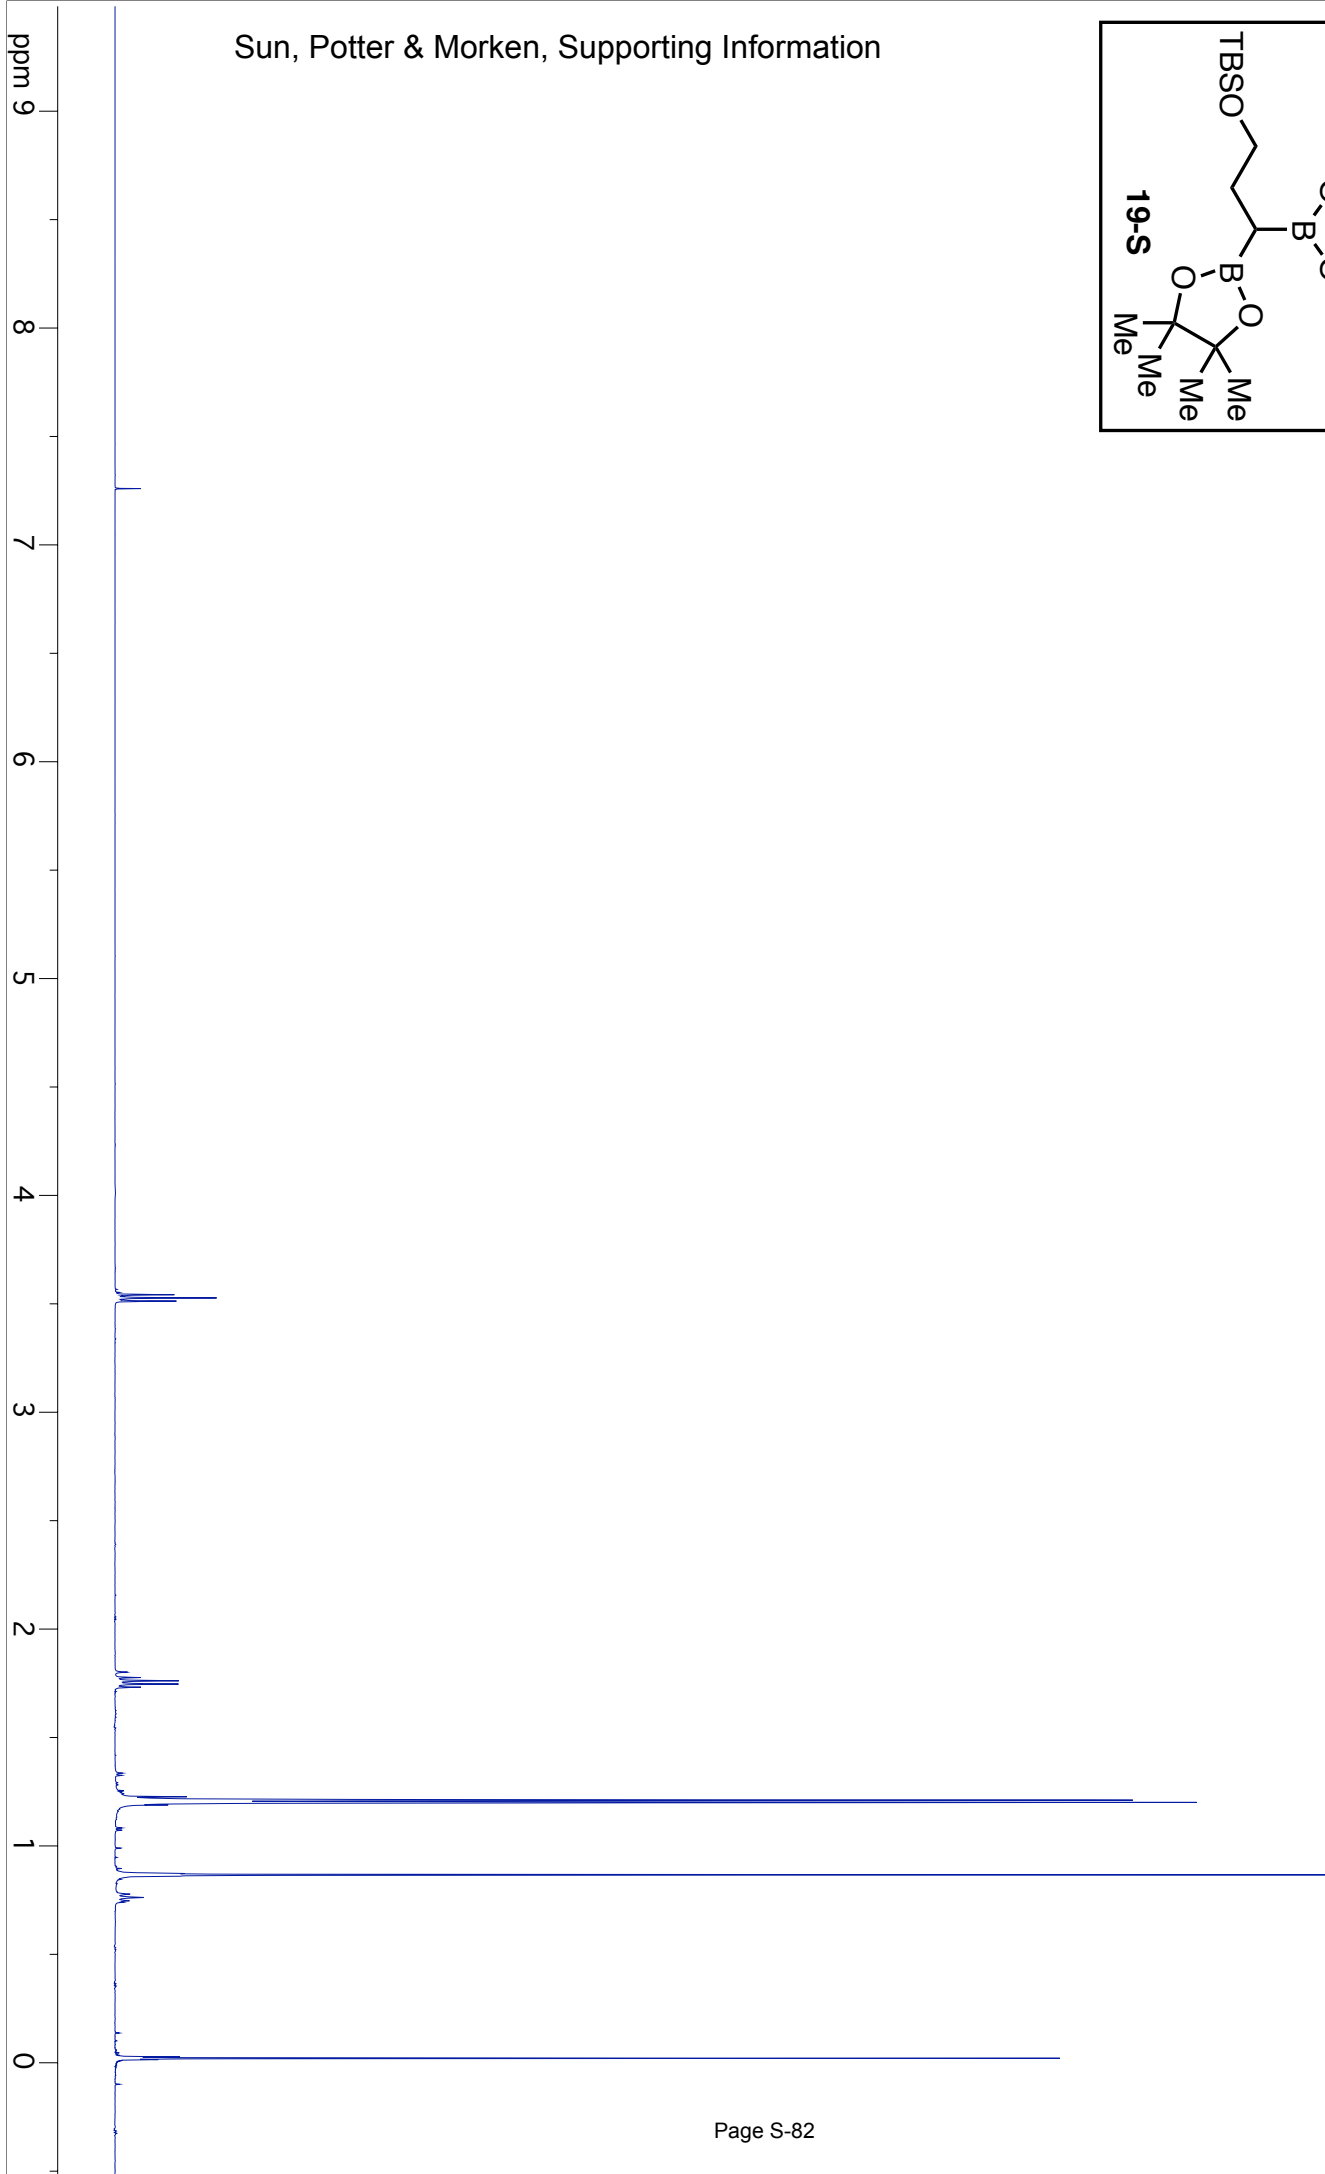

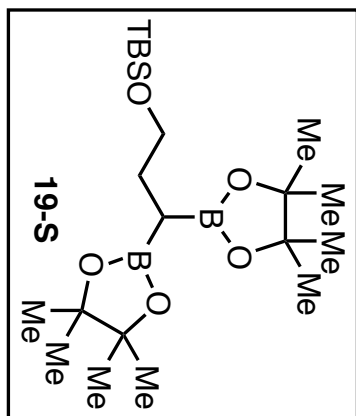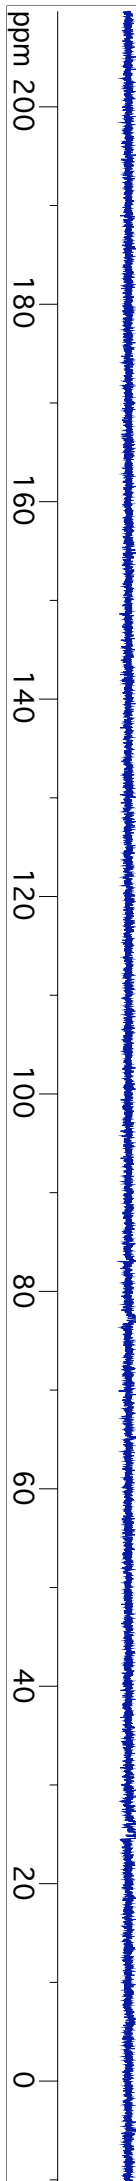

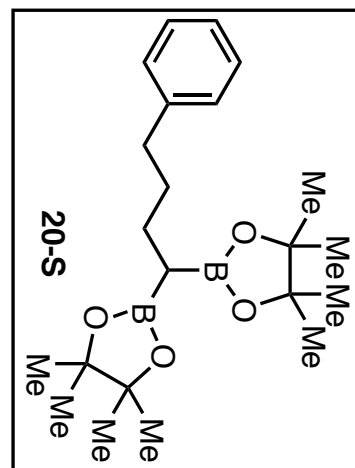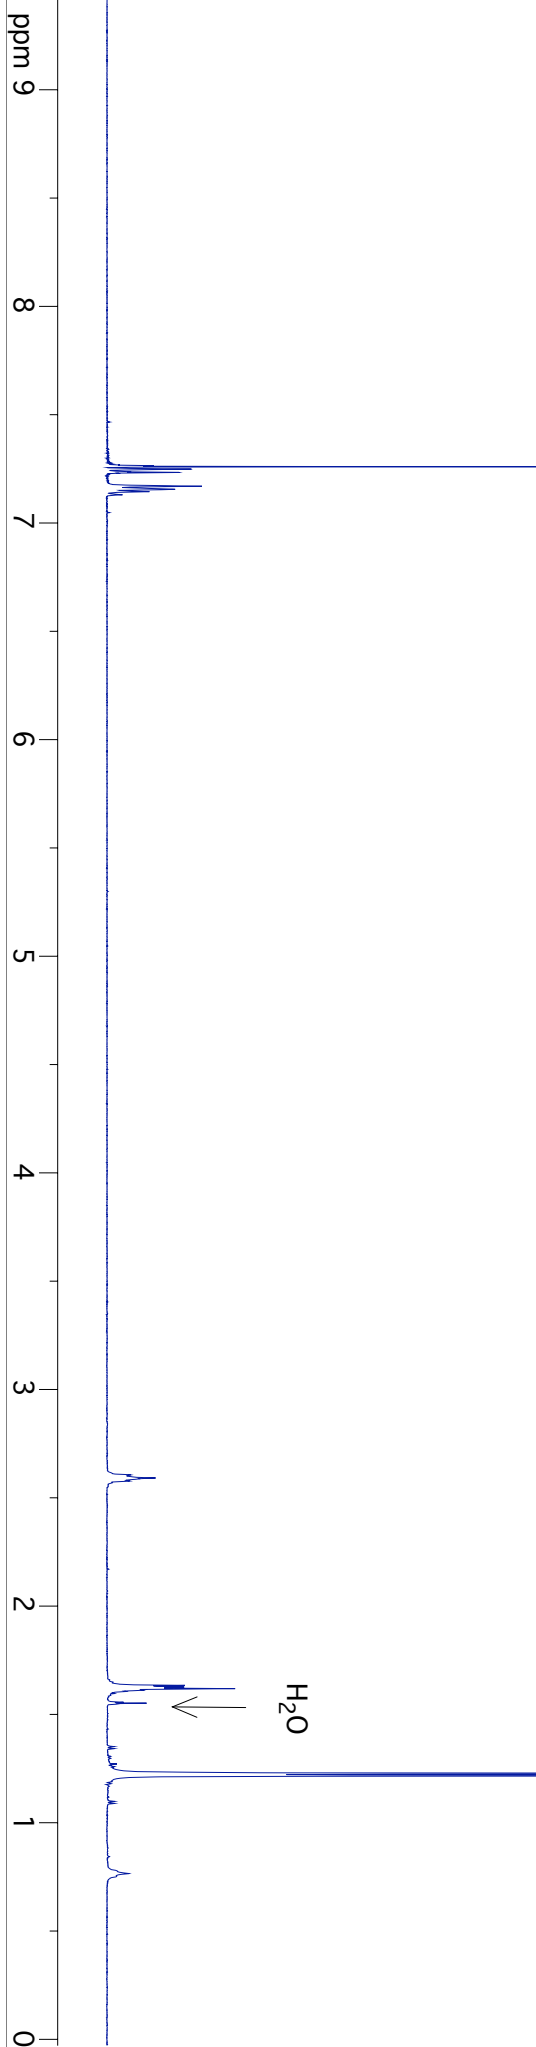

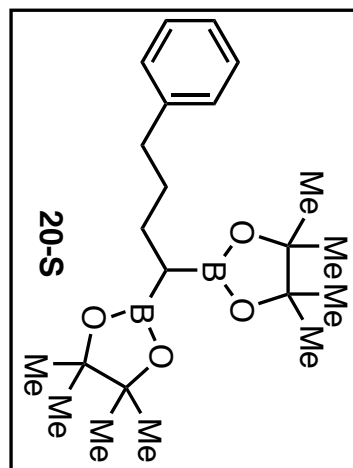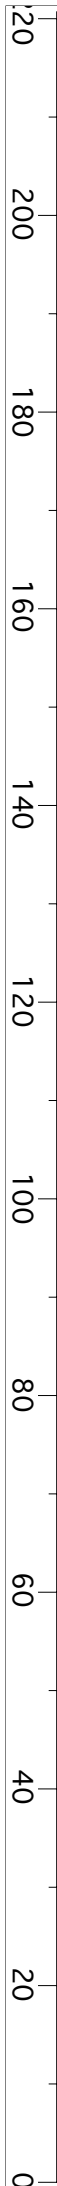

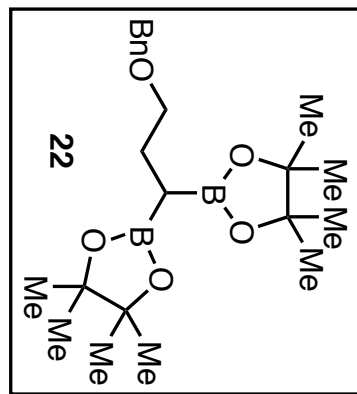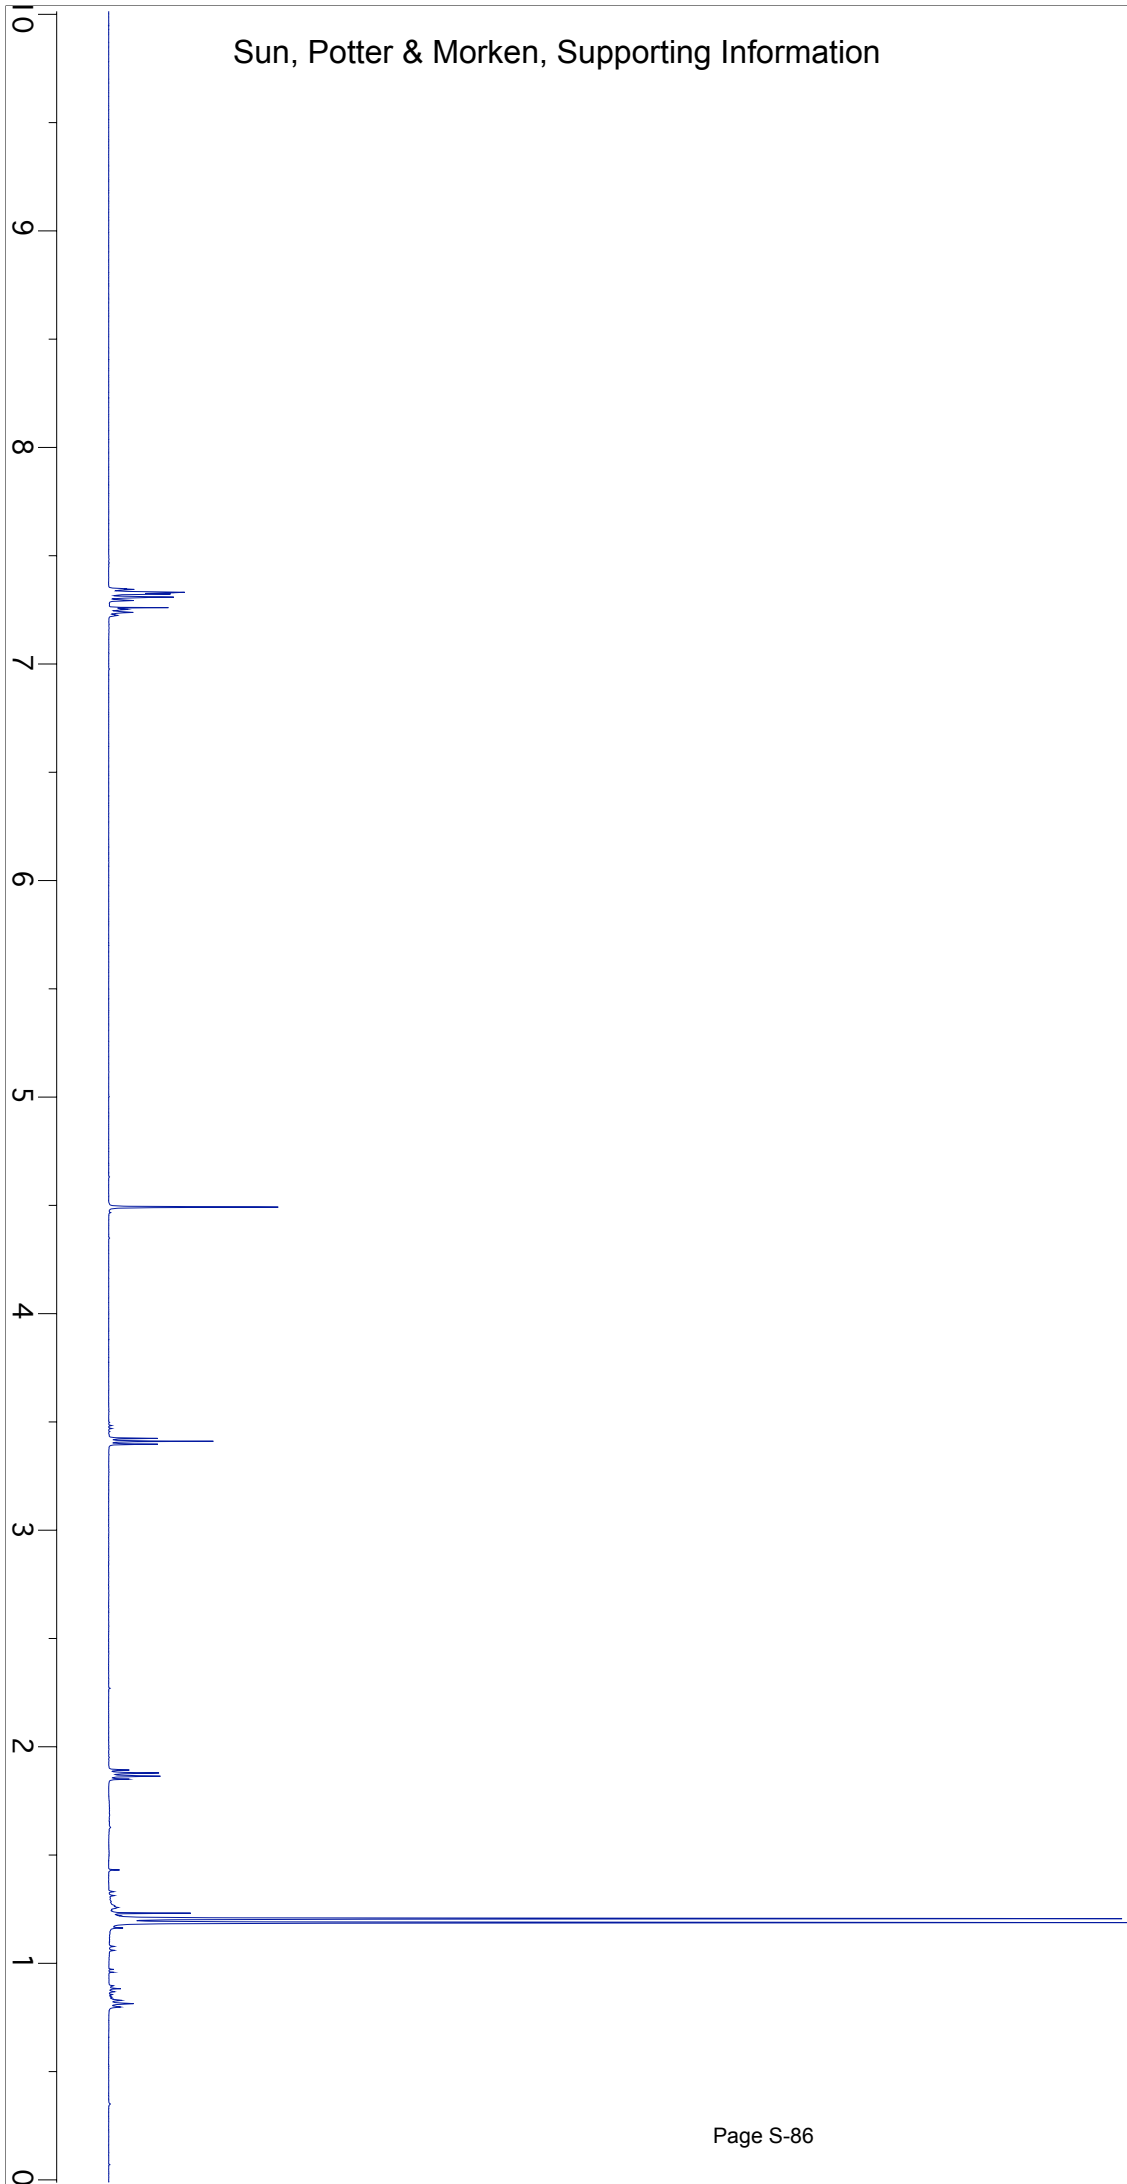

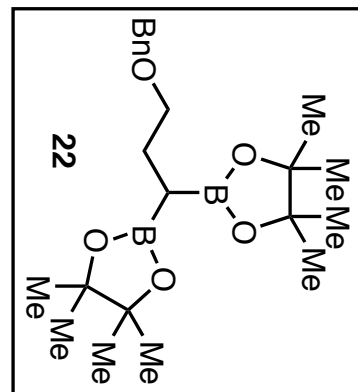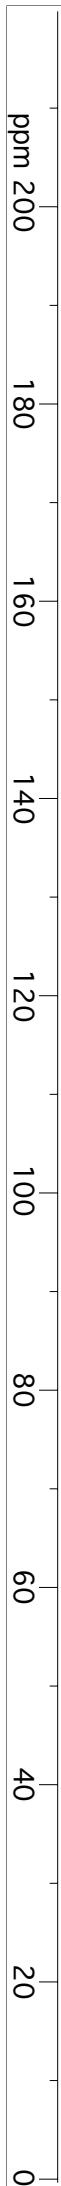

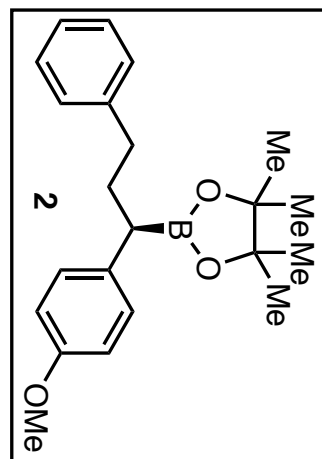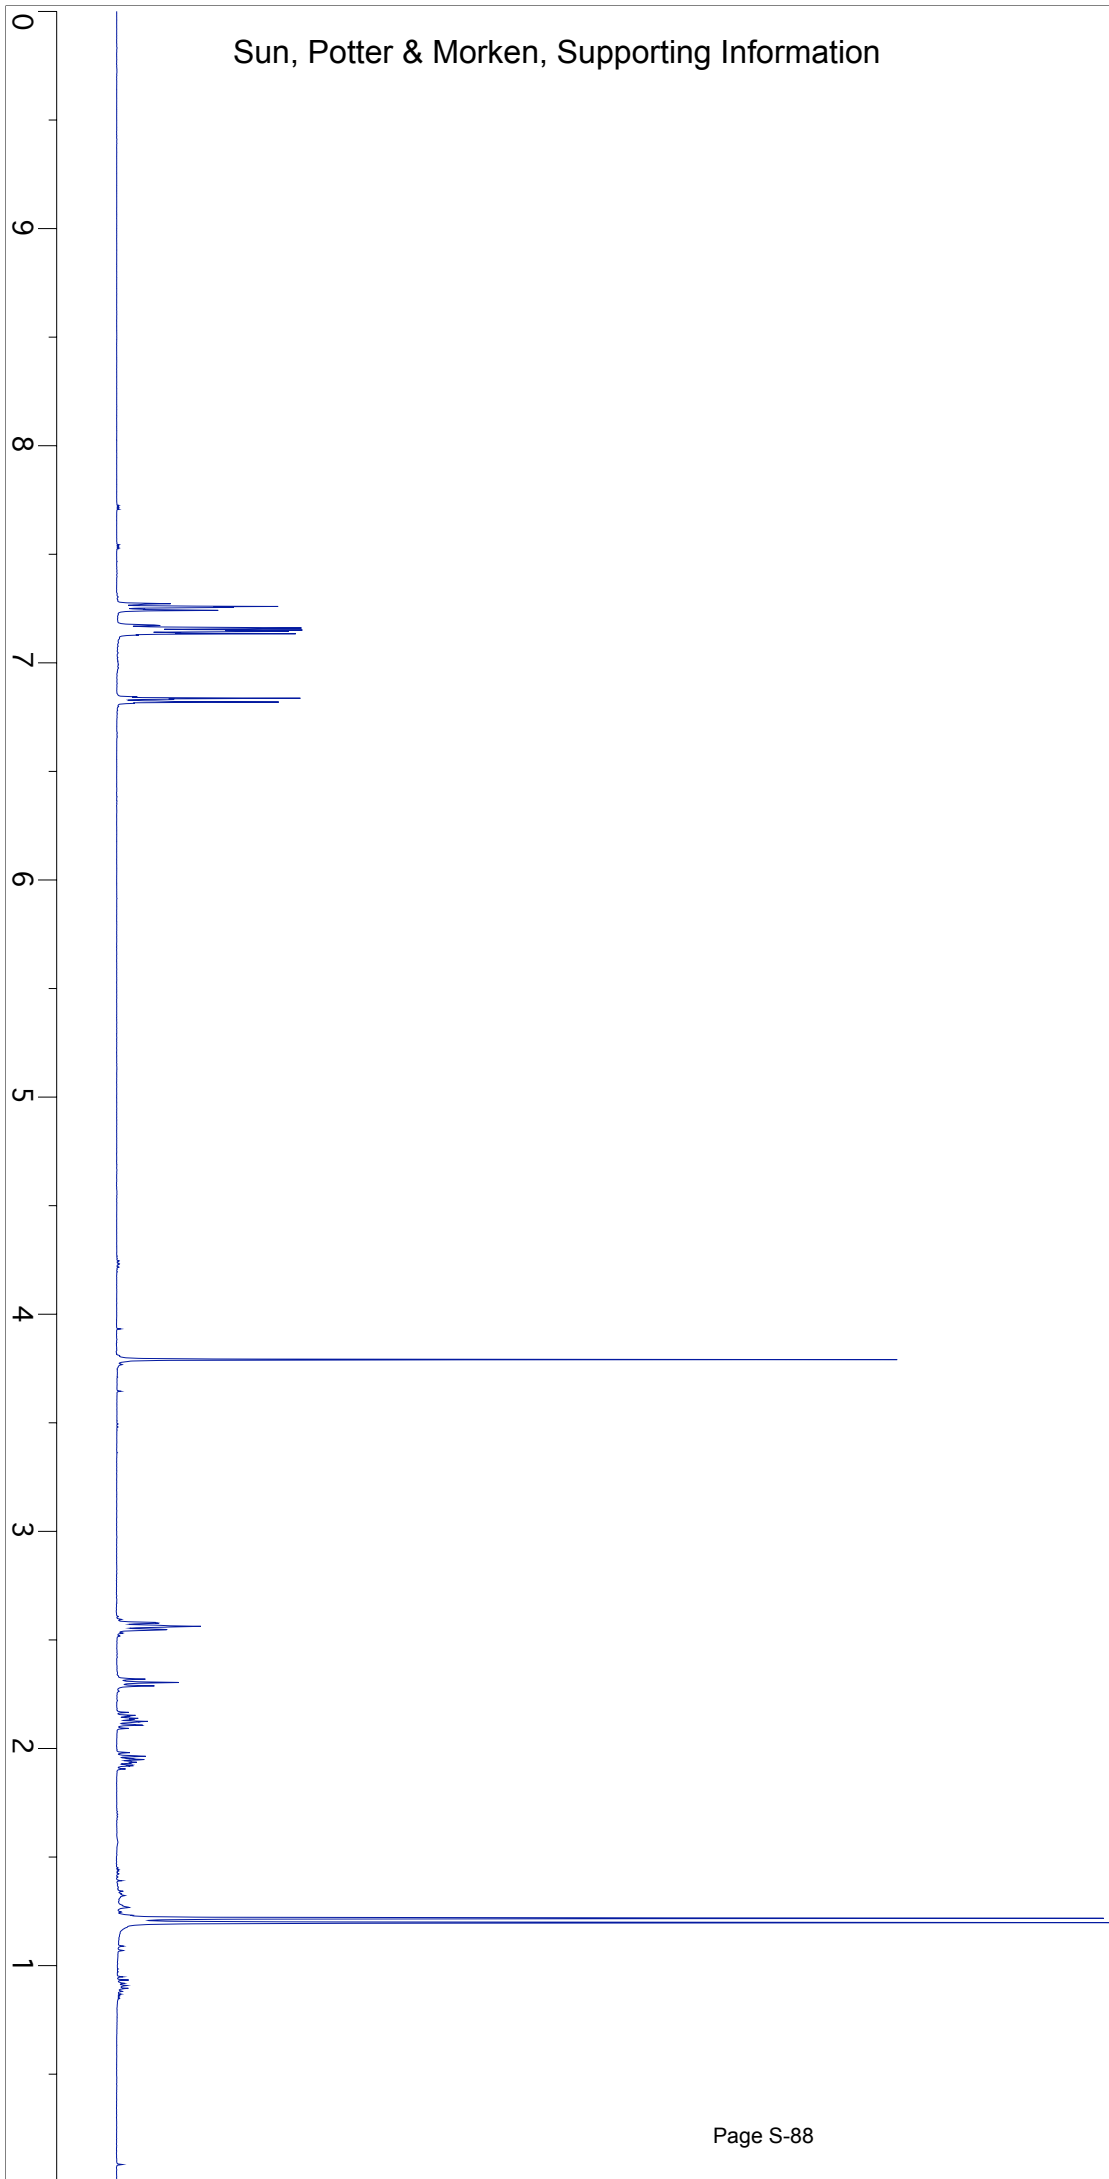



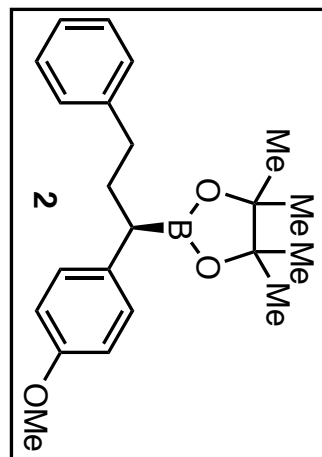

ppm 200  
180  
160  
140  
120  
100  
80  
60  
40  
20  
0

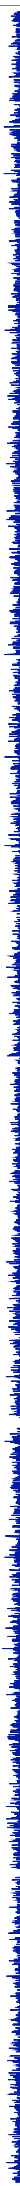

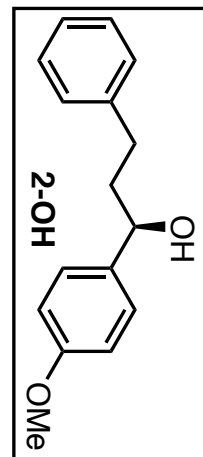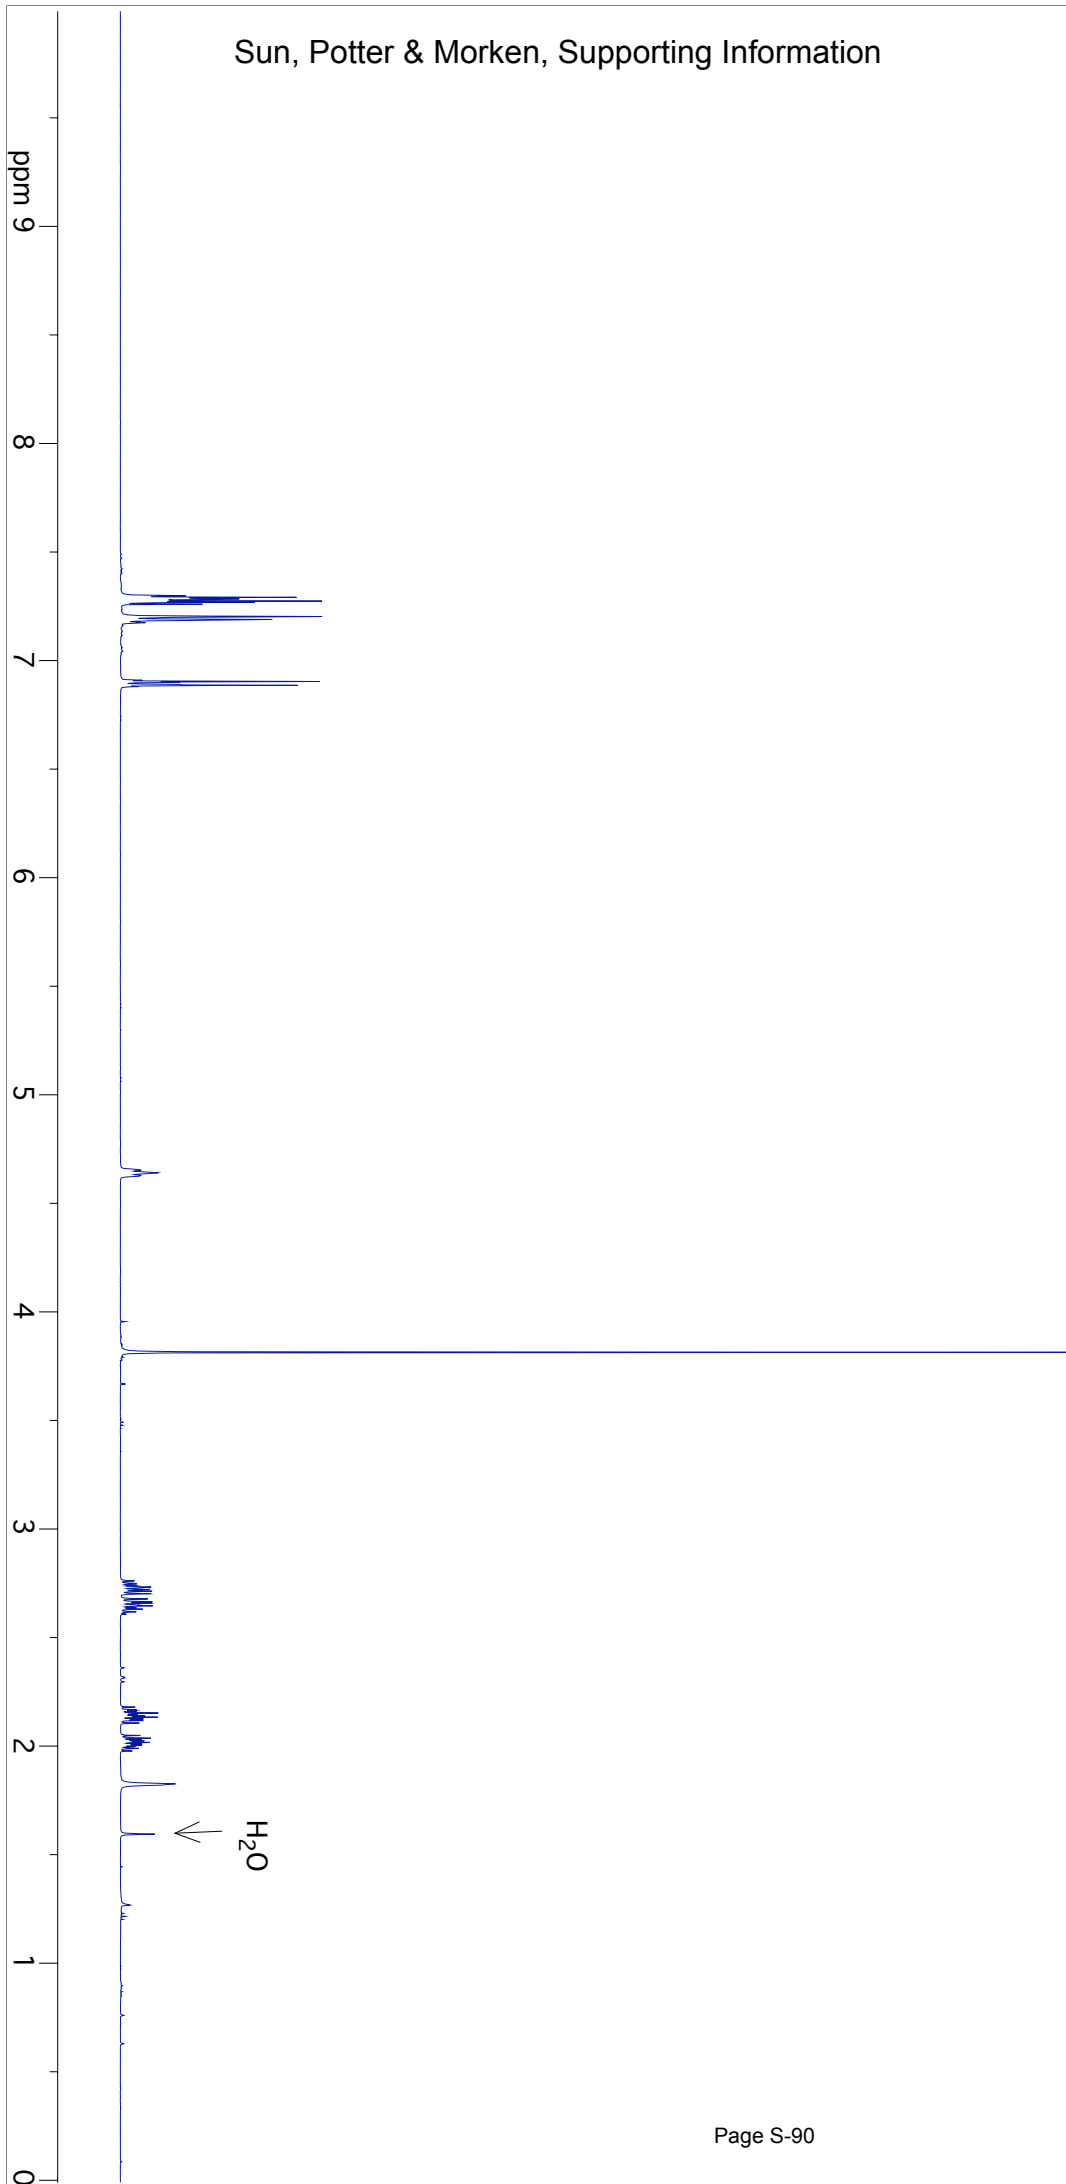

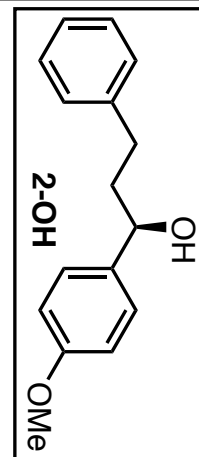

ppm 200  
180  
160  
140  
120  
100  
80  
60  
40  
20  
0

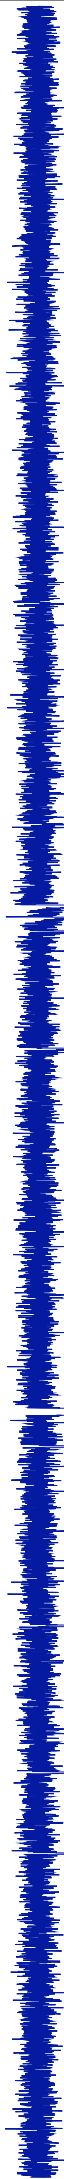

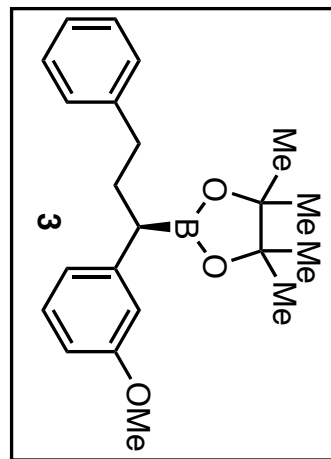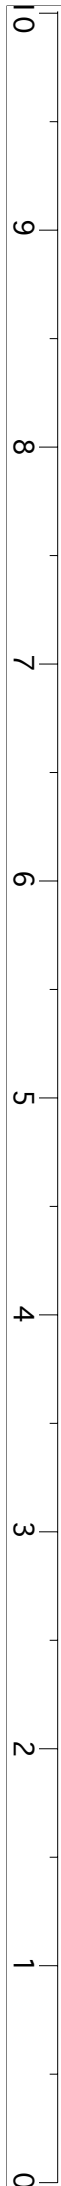

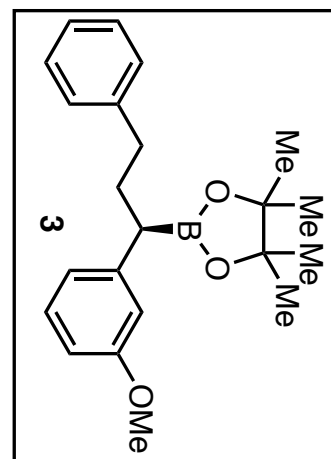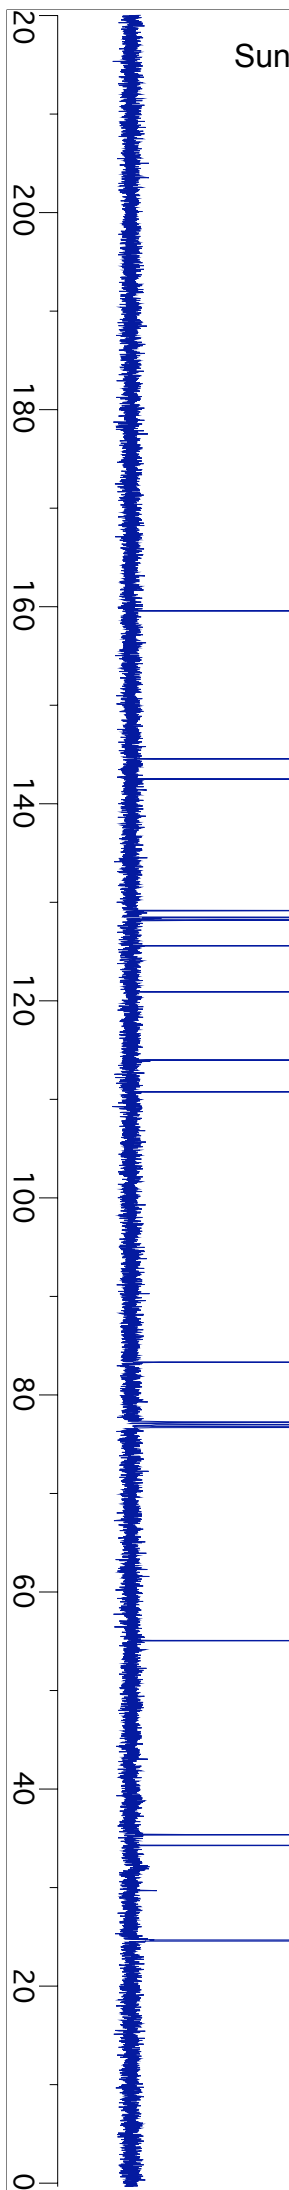

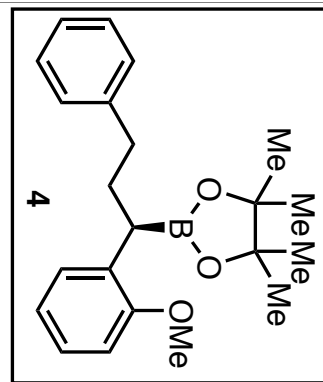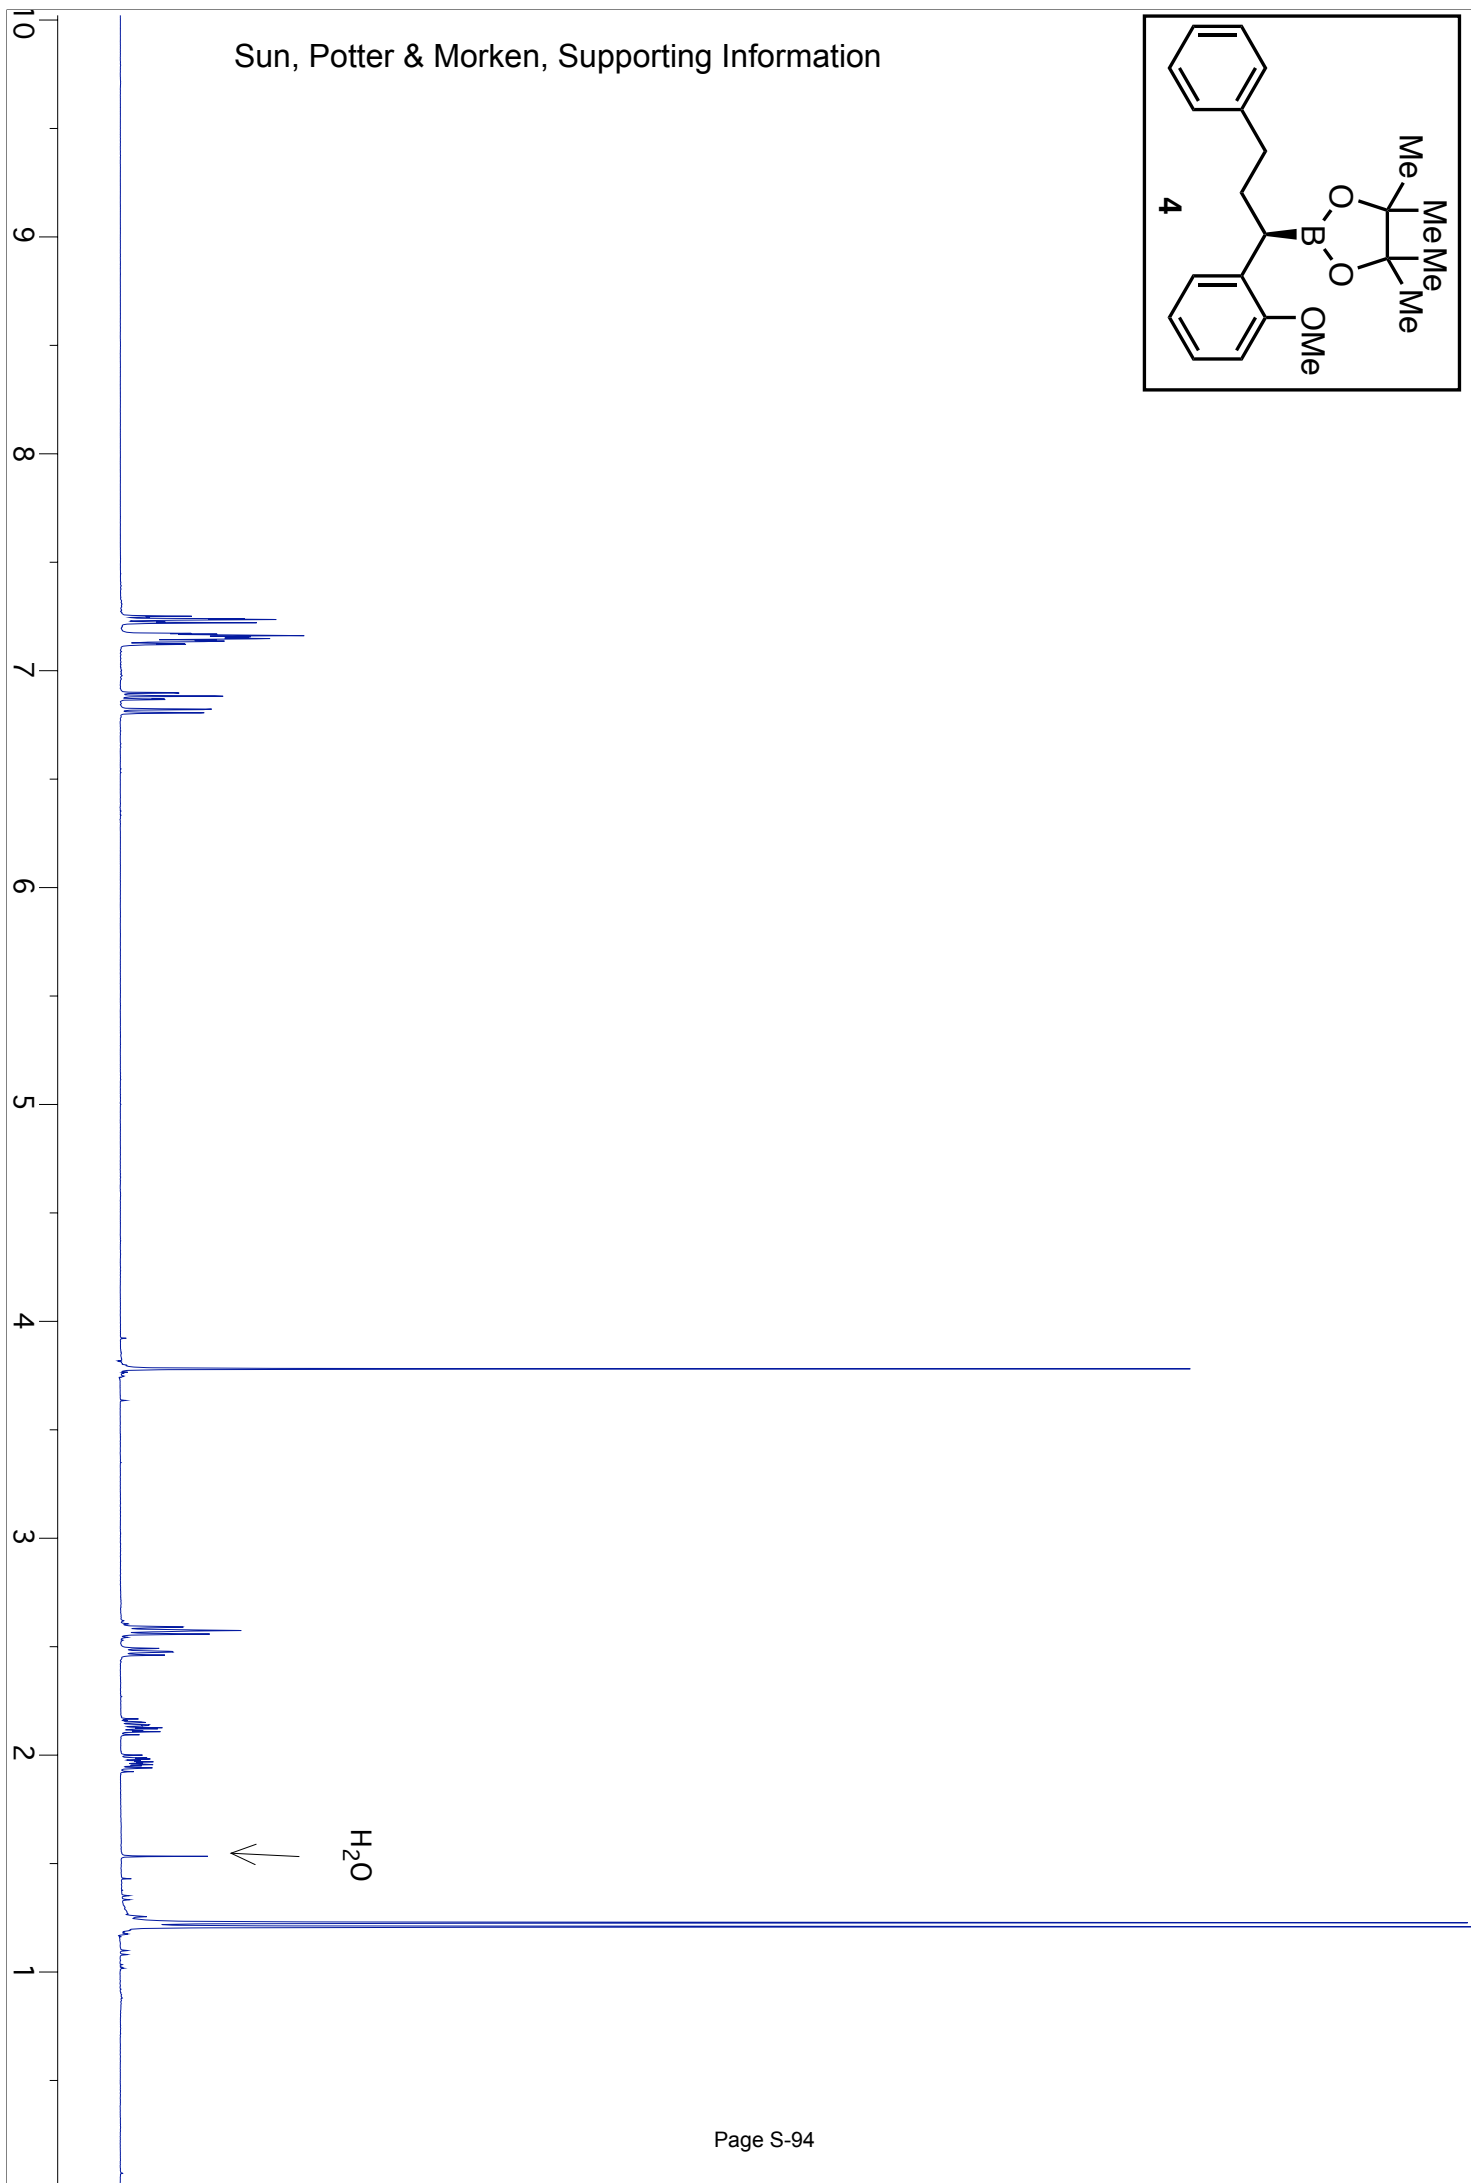

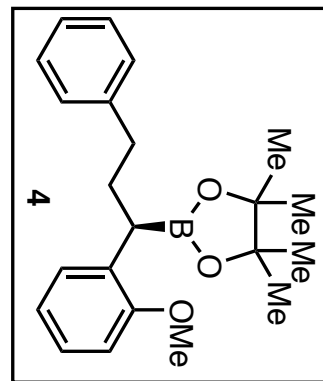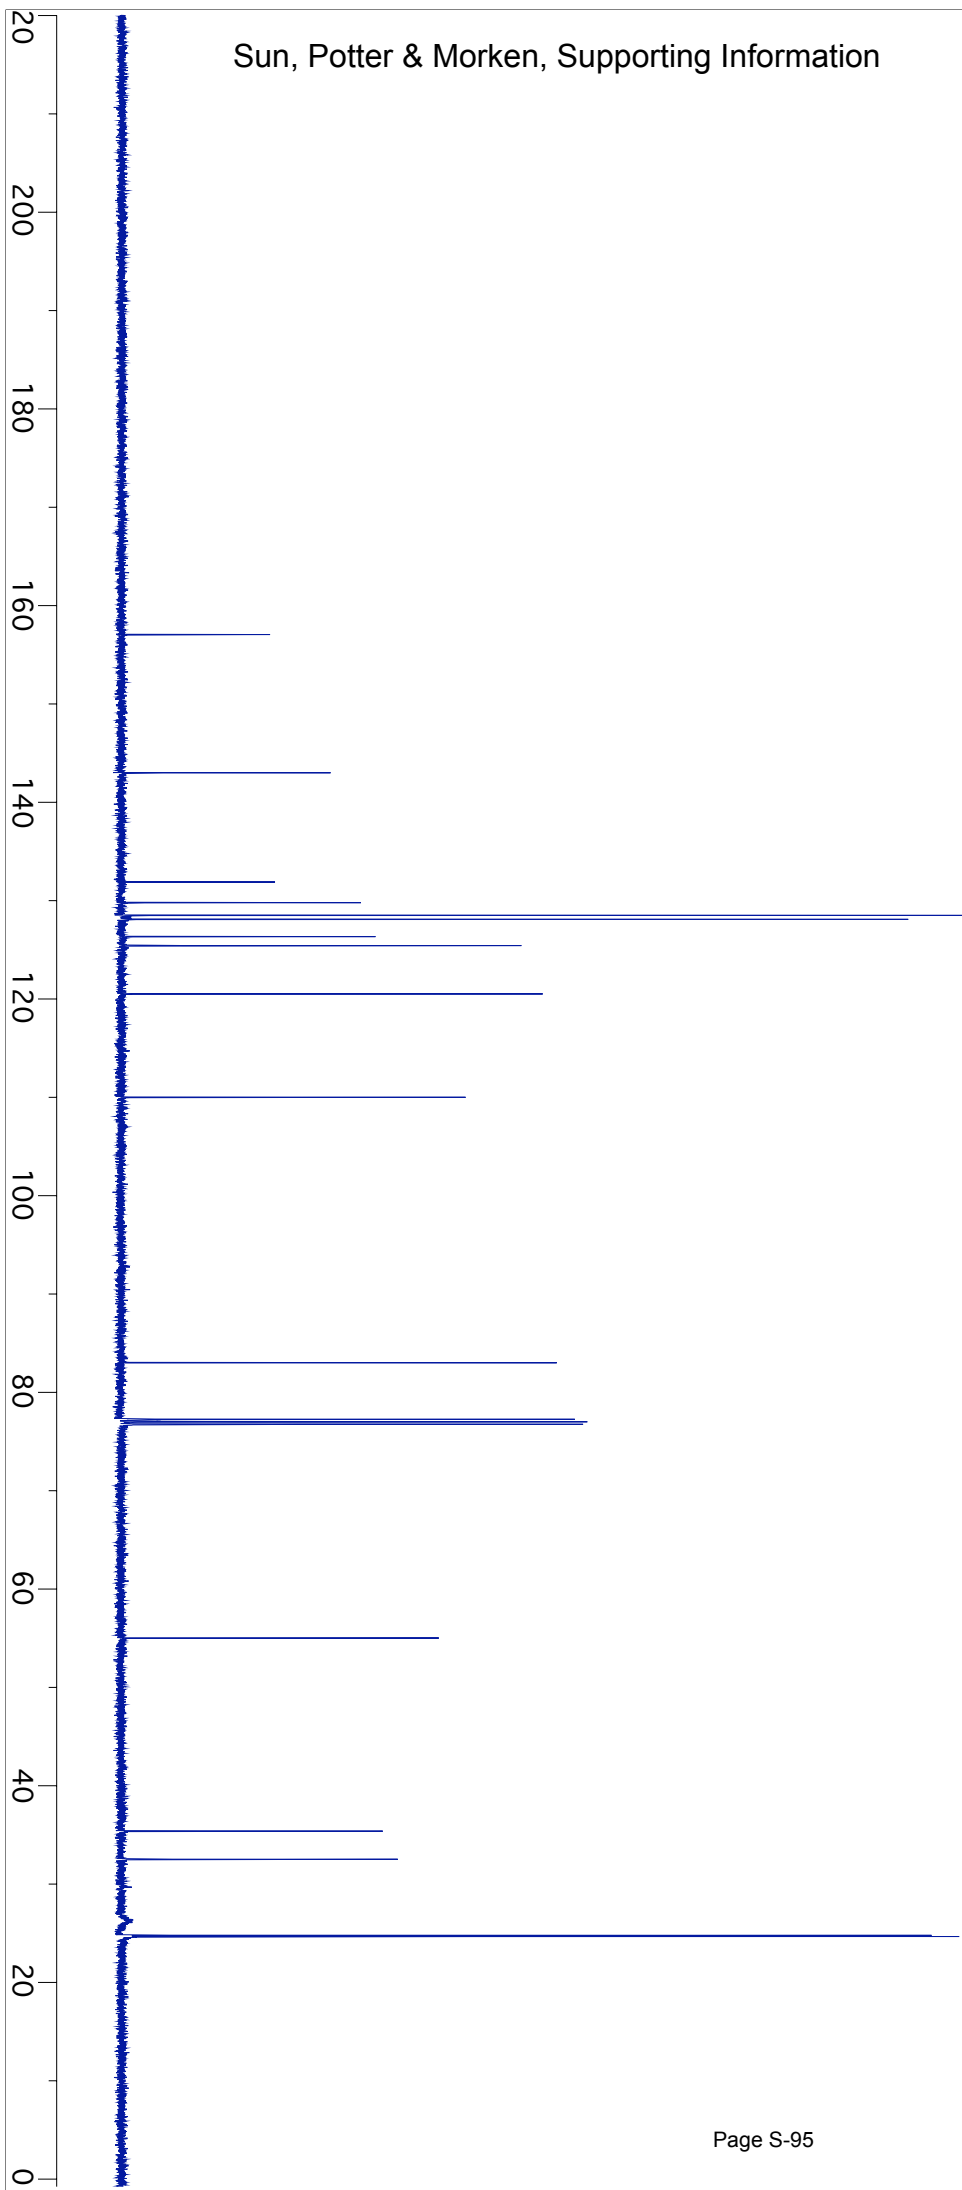

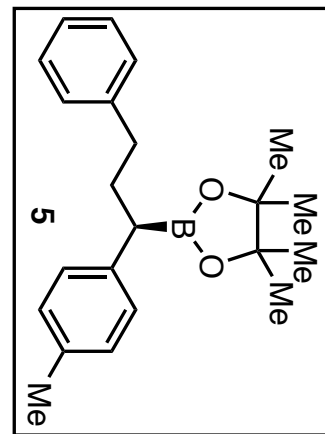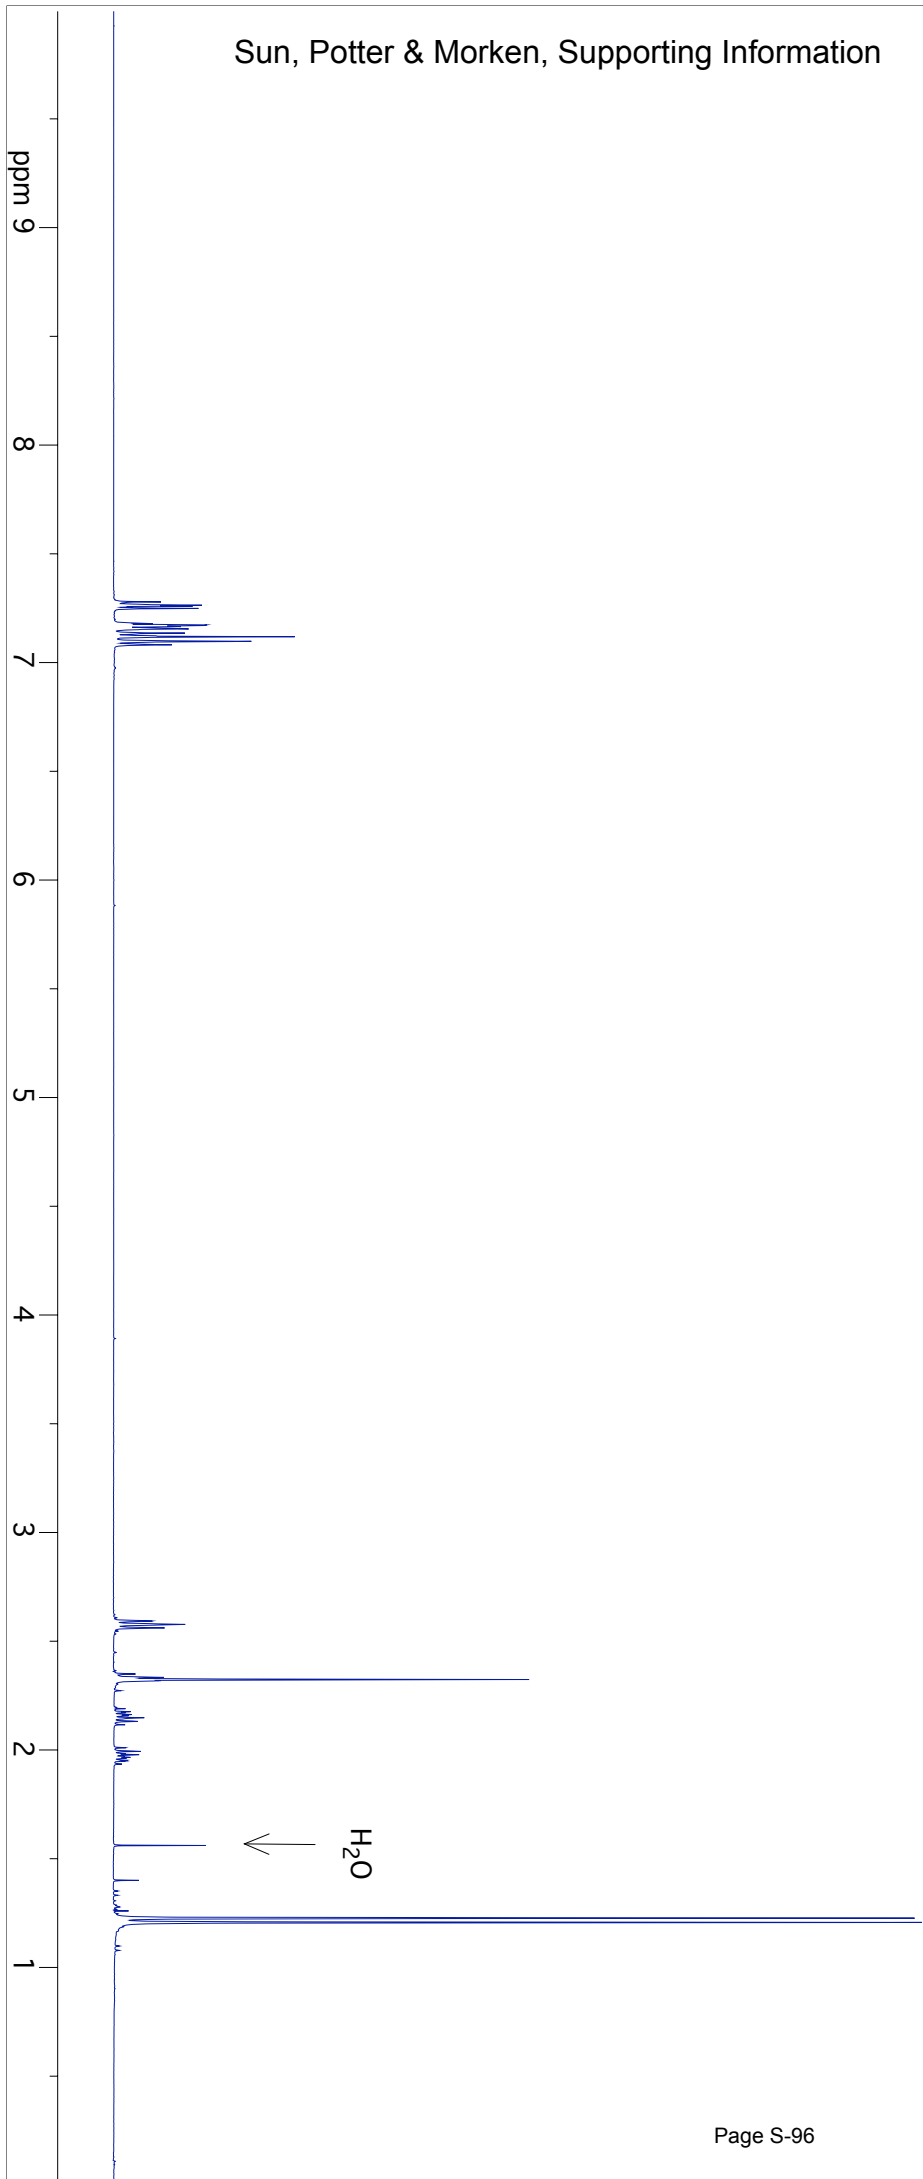



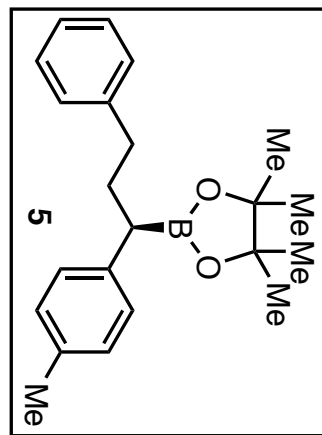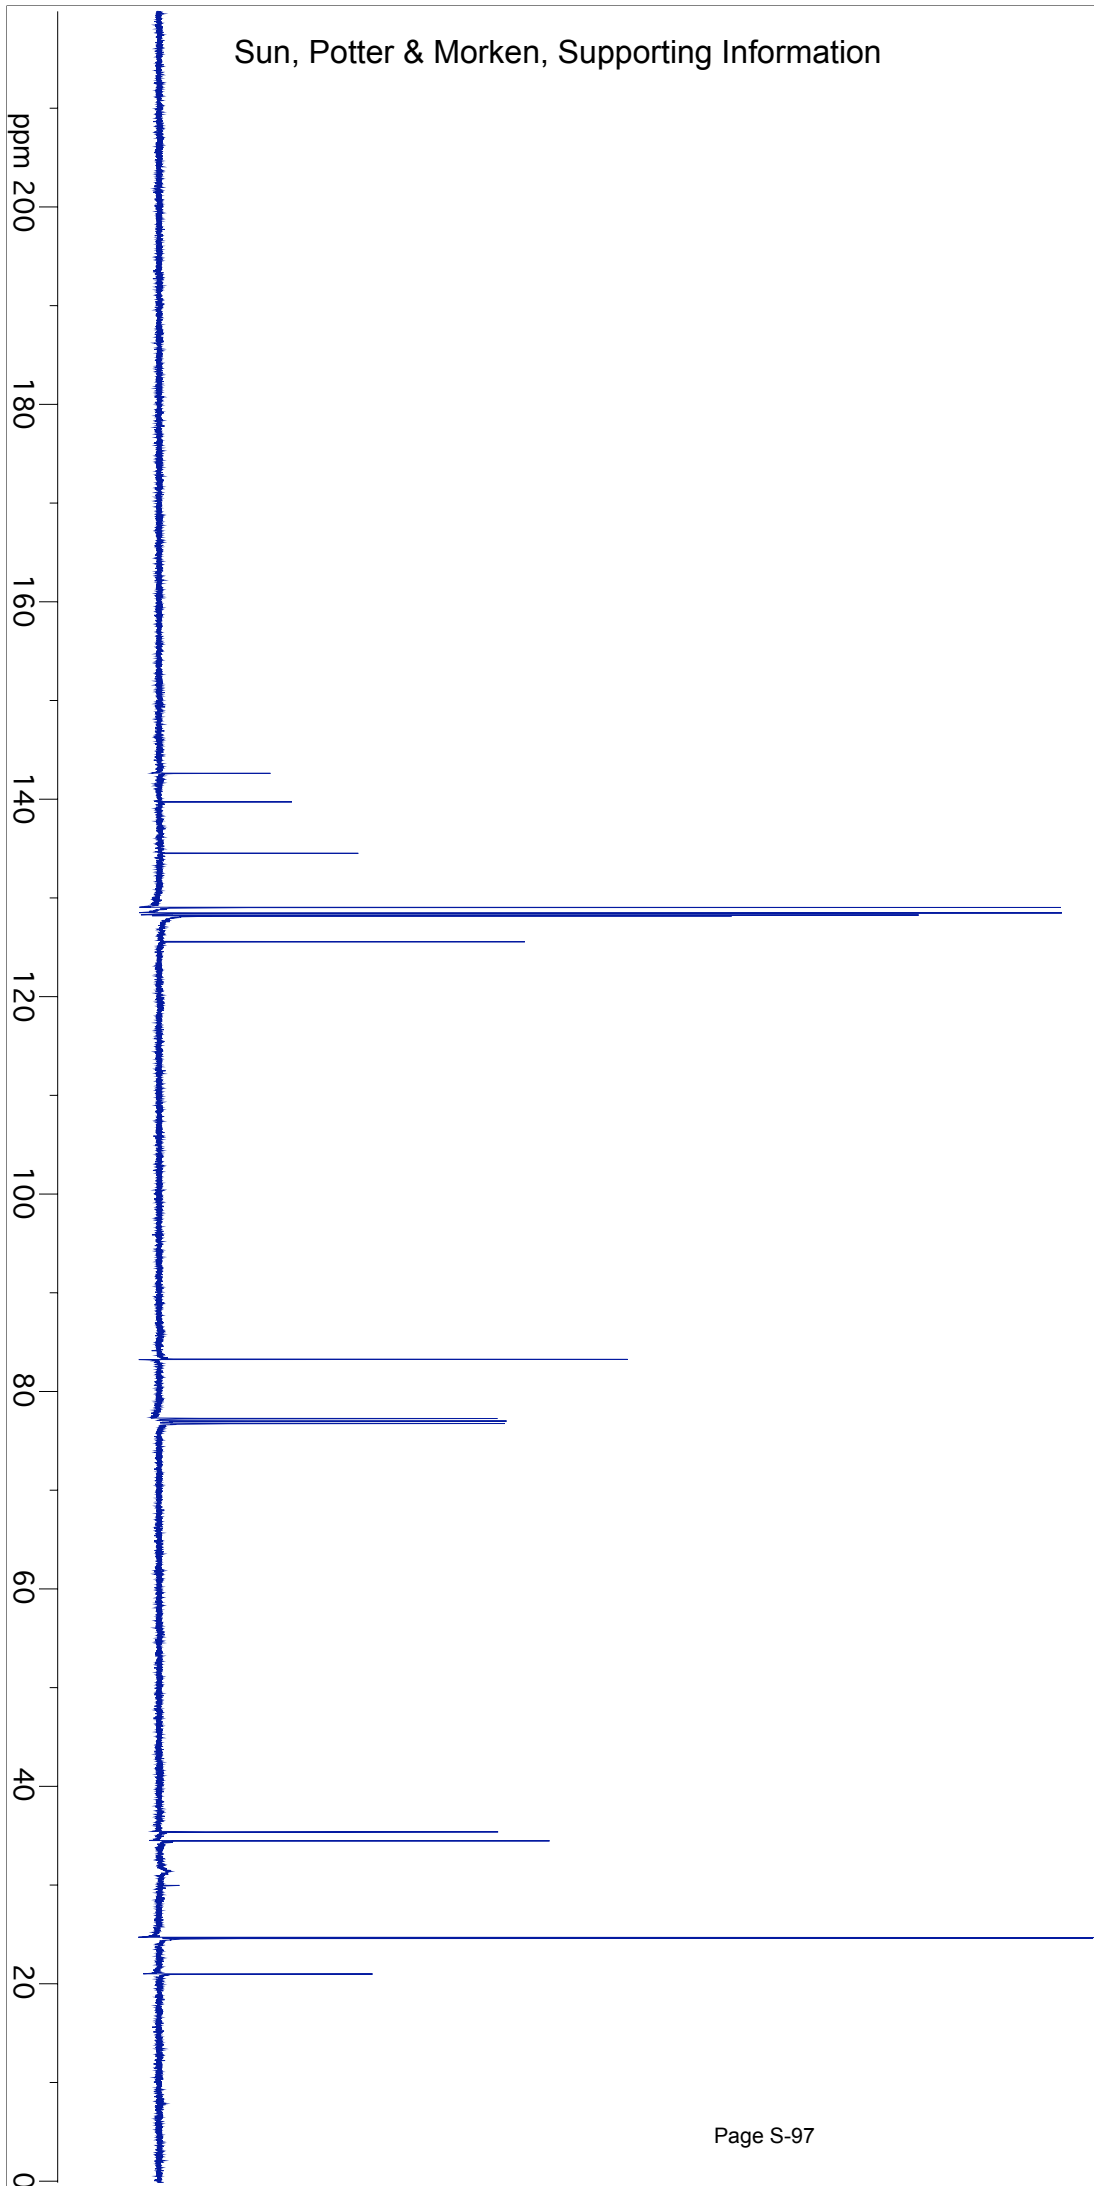

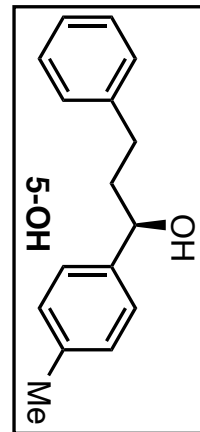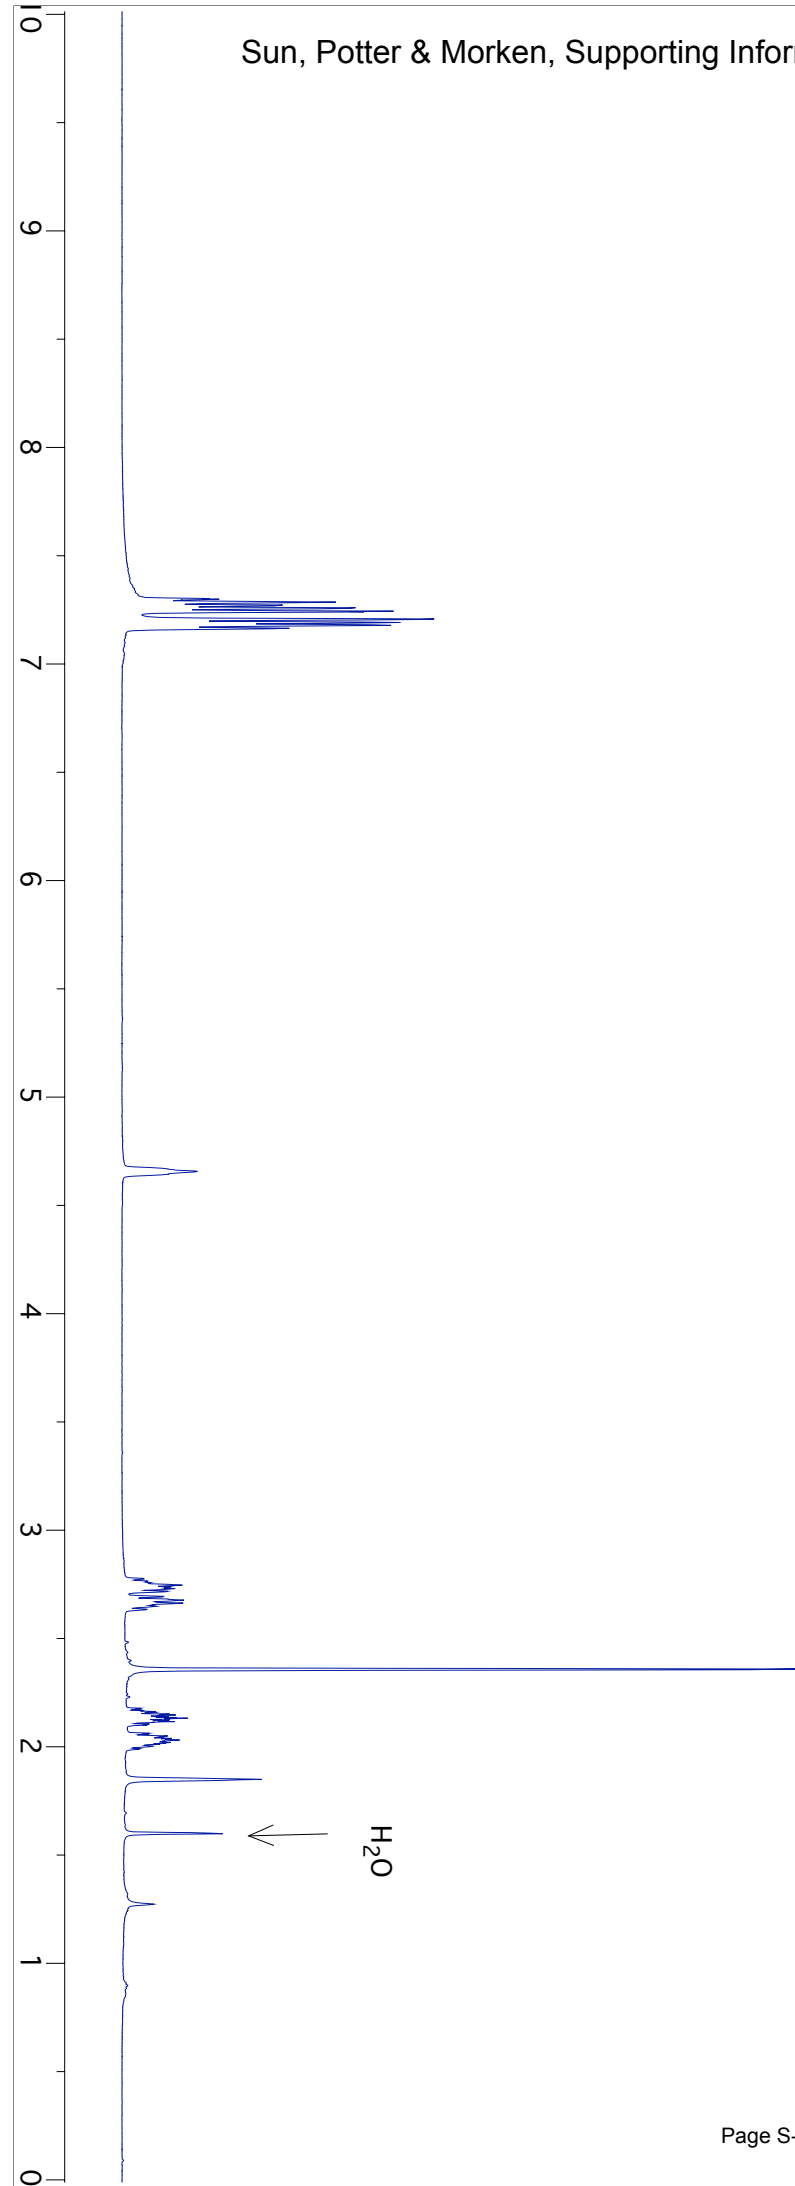

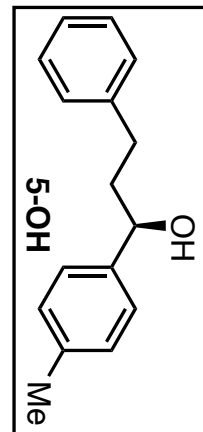

ppm 200  
180  
160  
140  
120  
100  
80  
60  
40  
20  
0

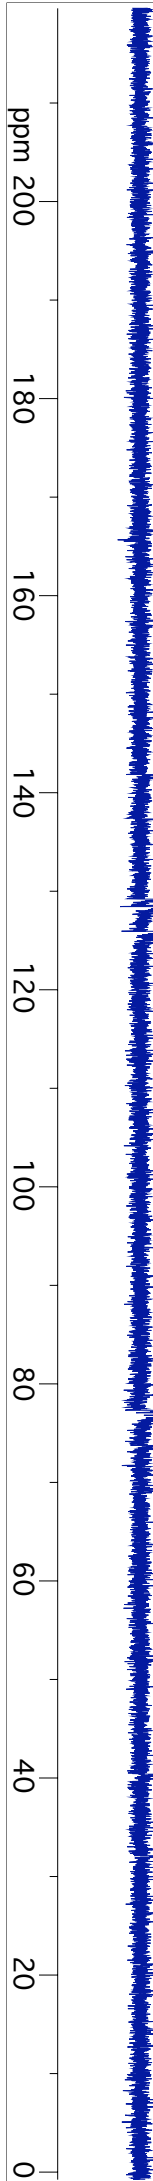

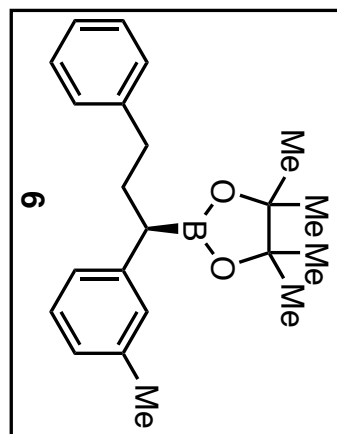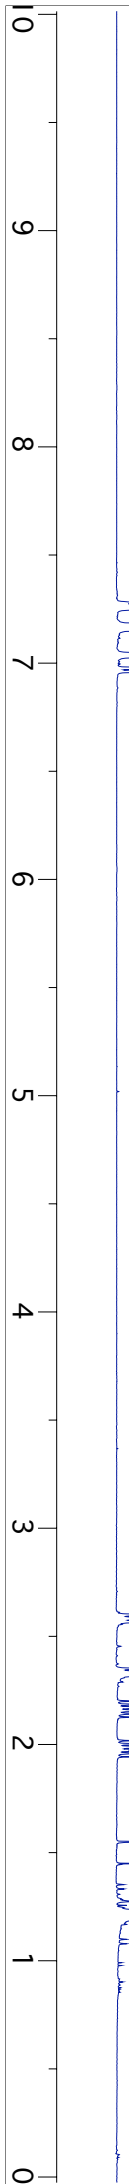

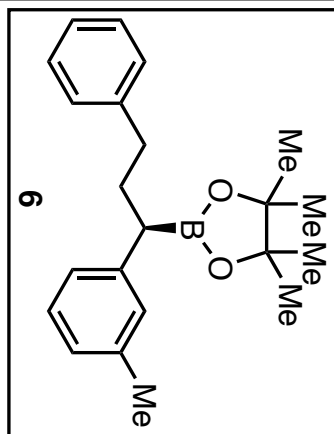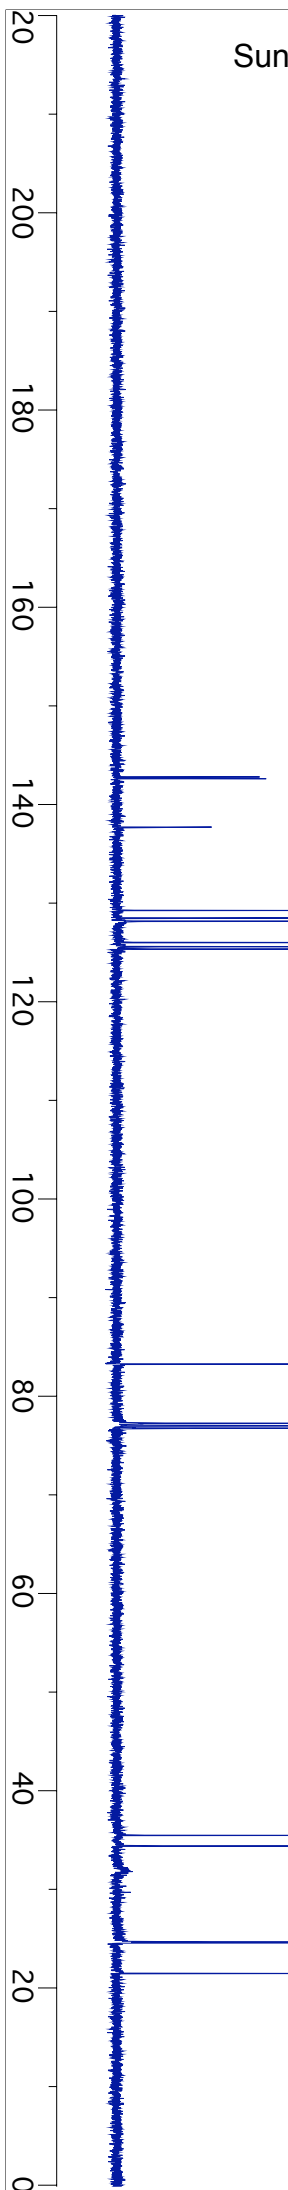

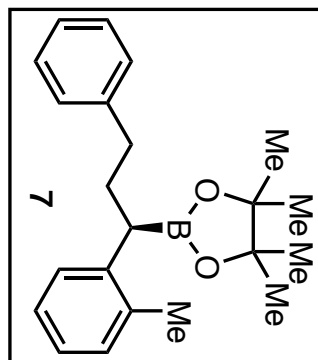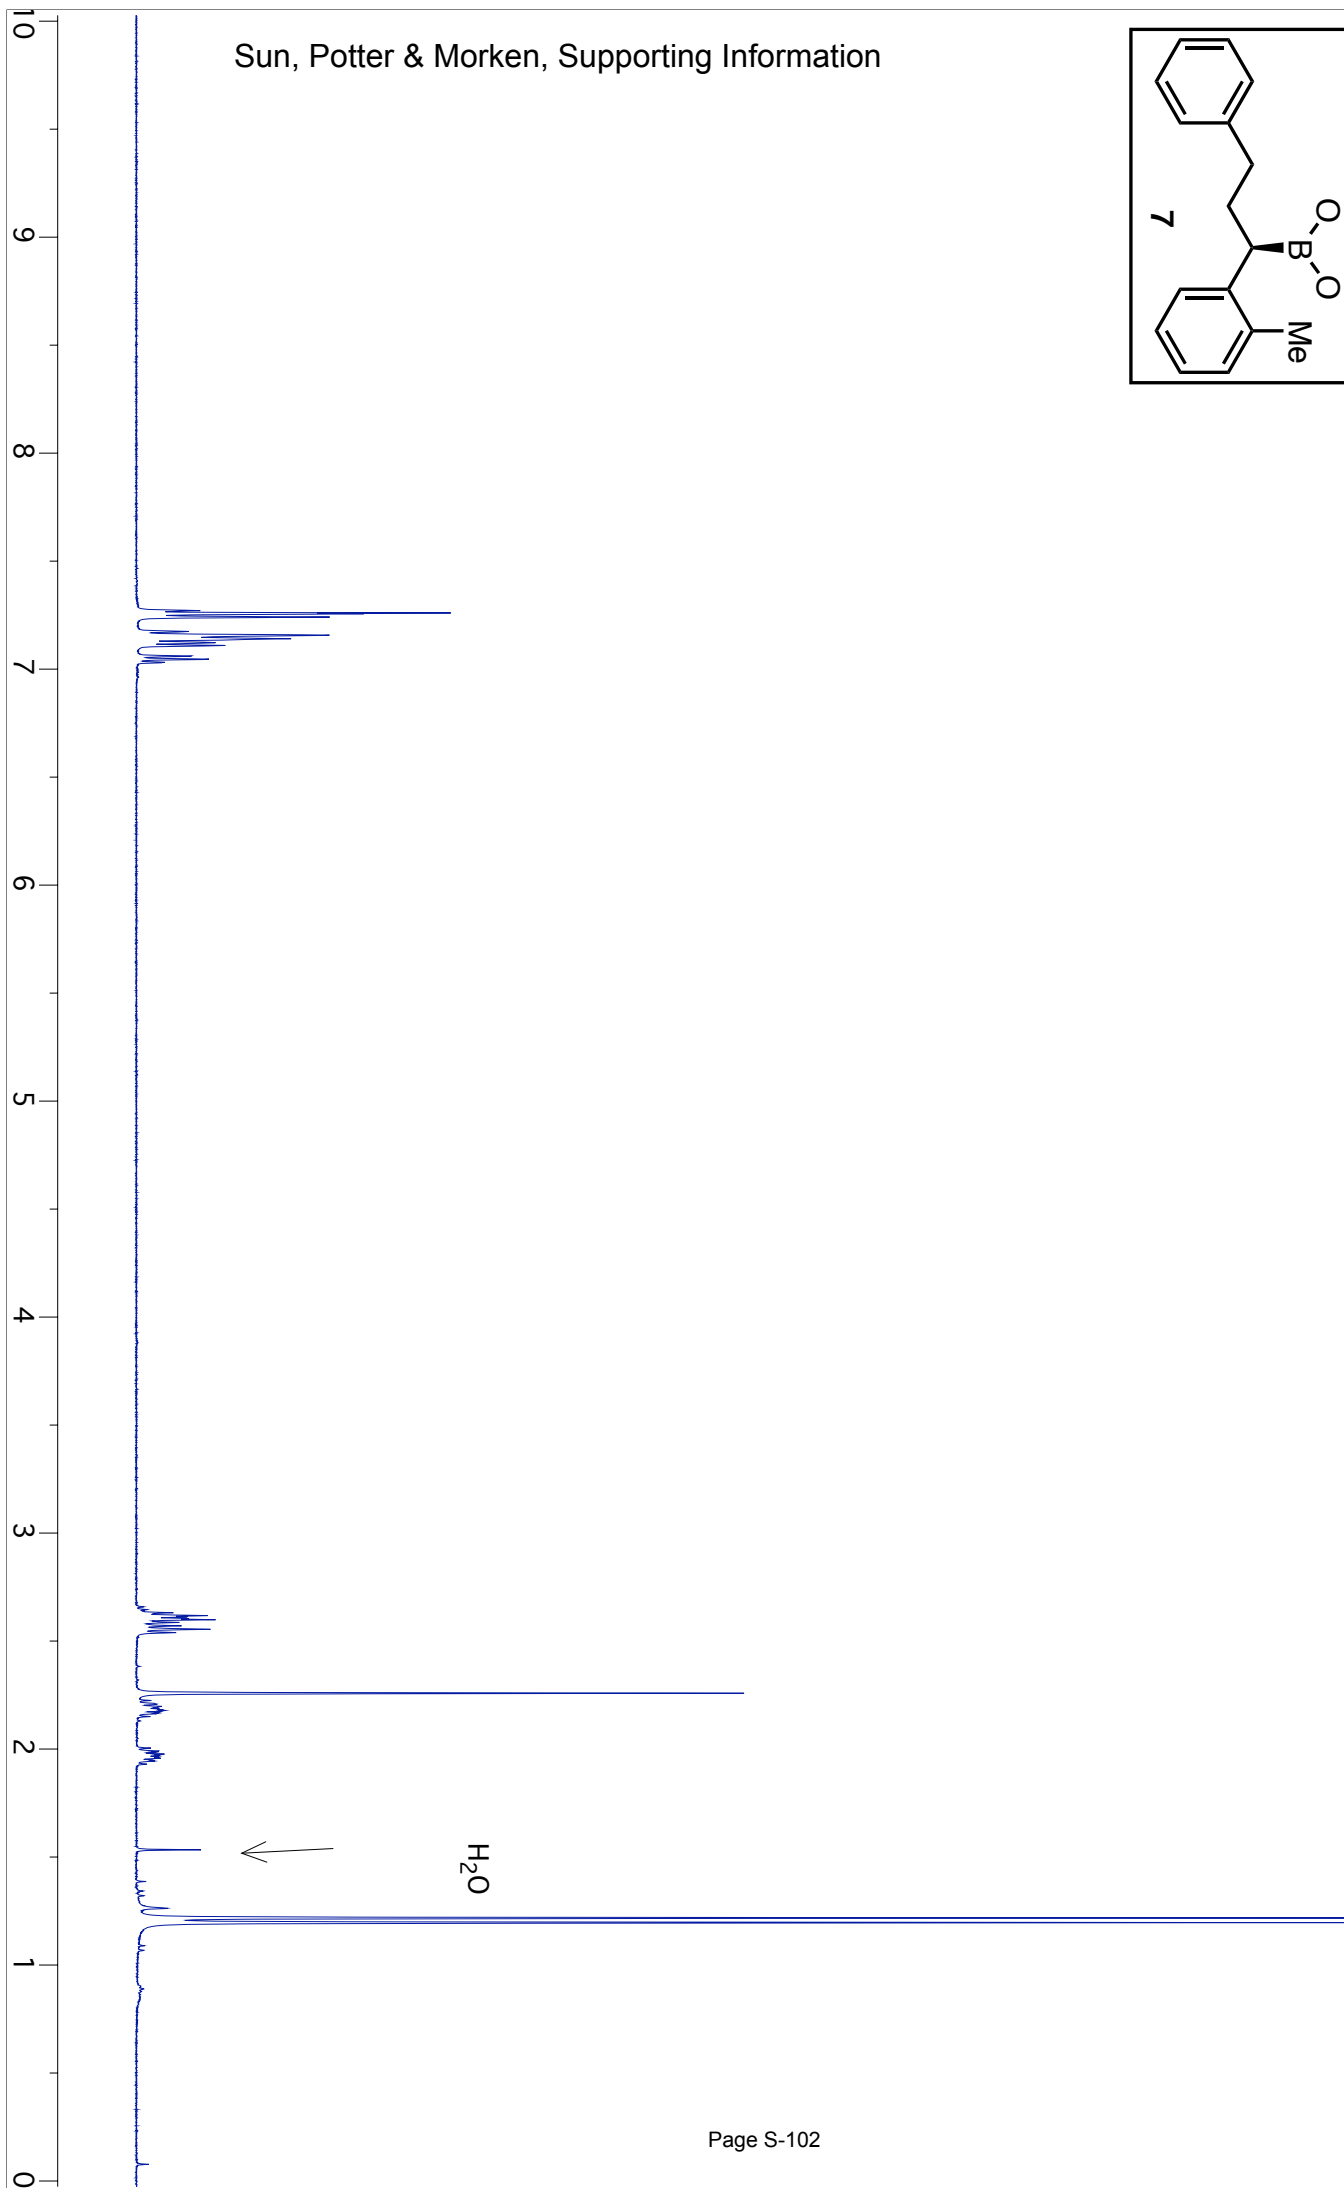

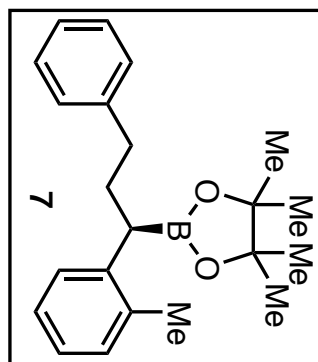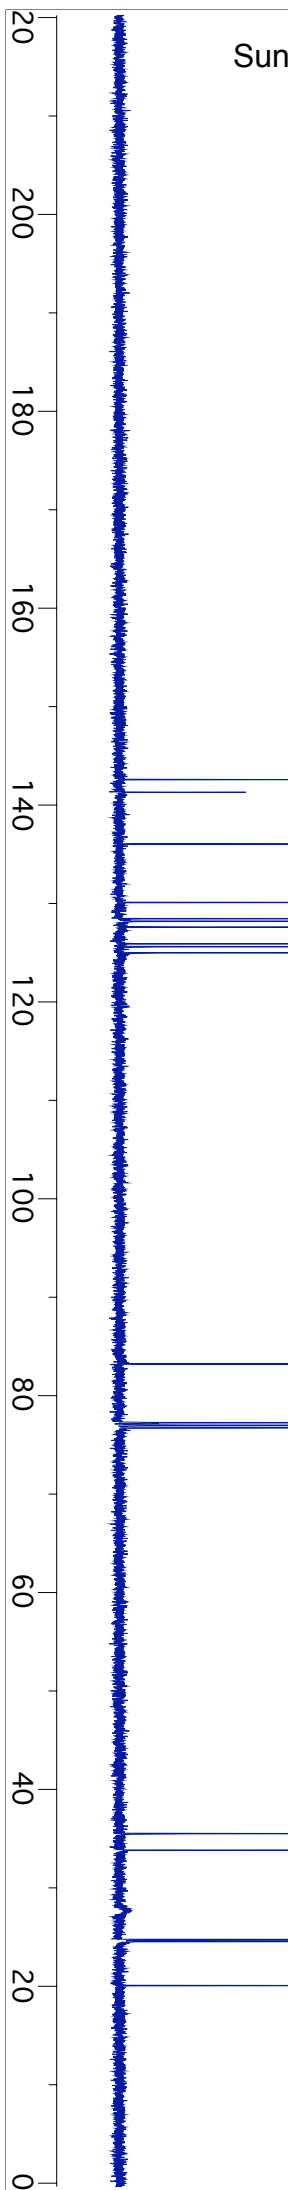

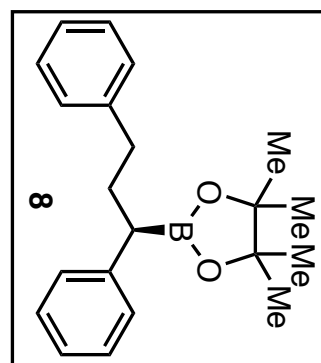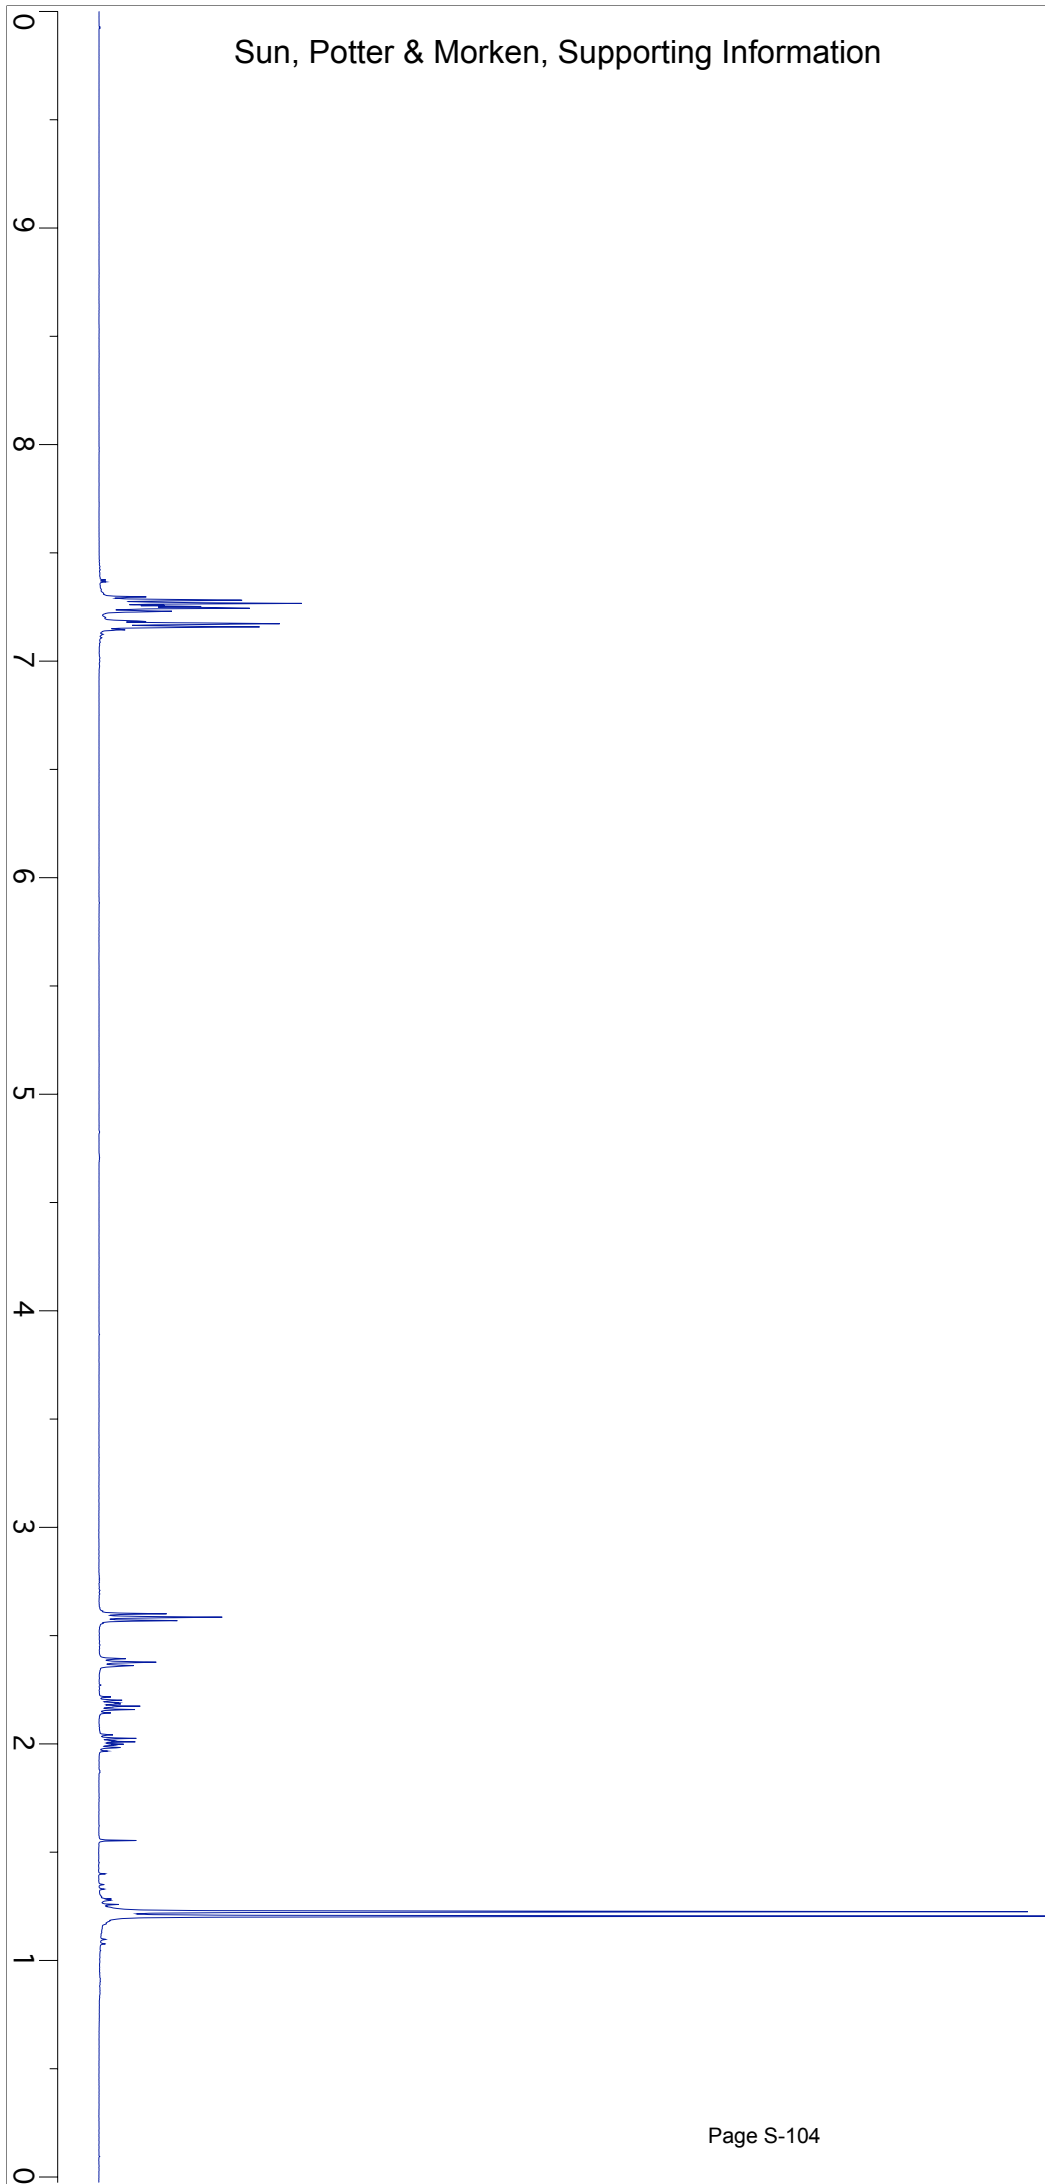



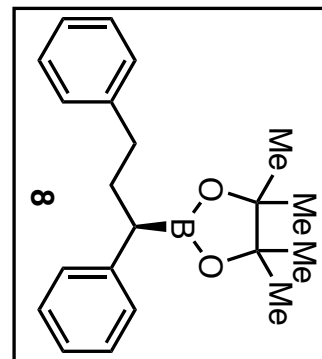

ppm 200  
180  
160  
140  
120  
100  
80  
60  
40  
20  
0

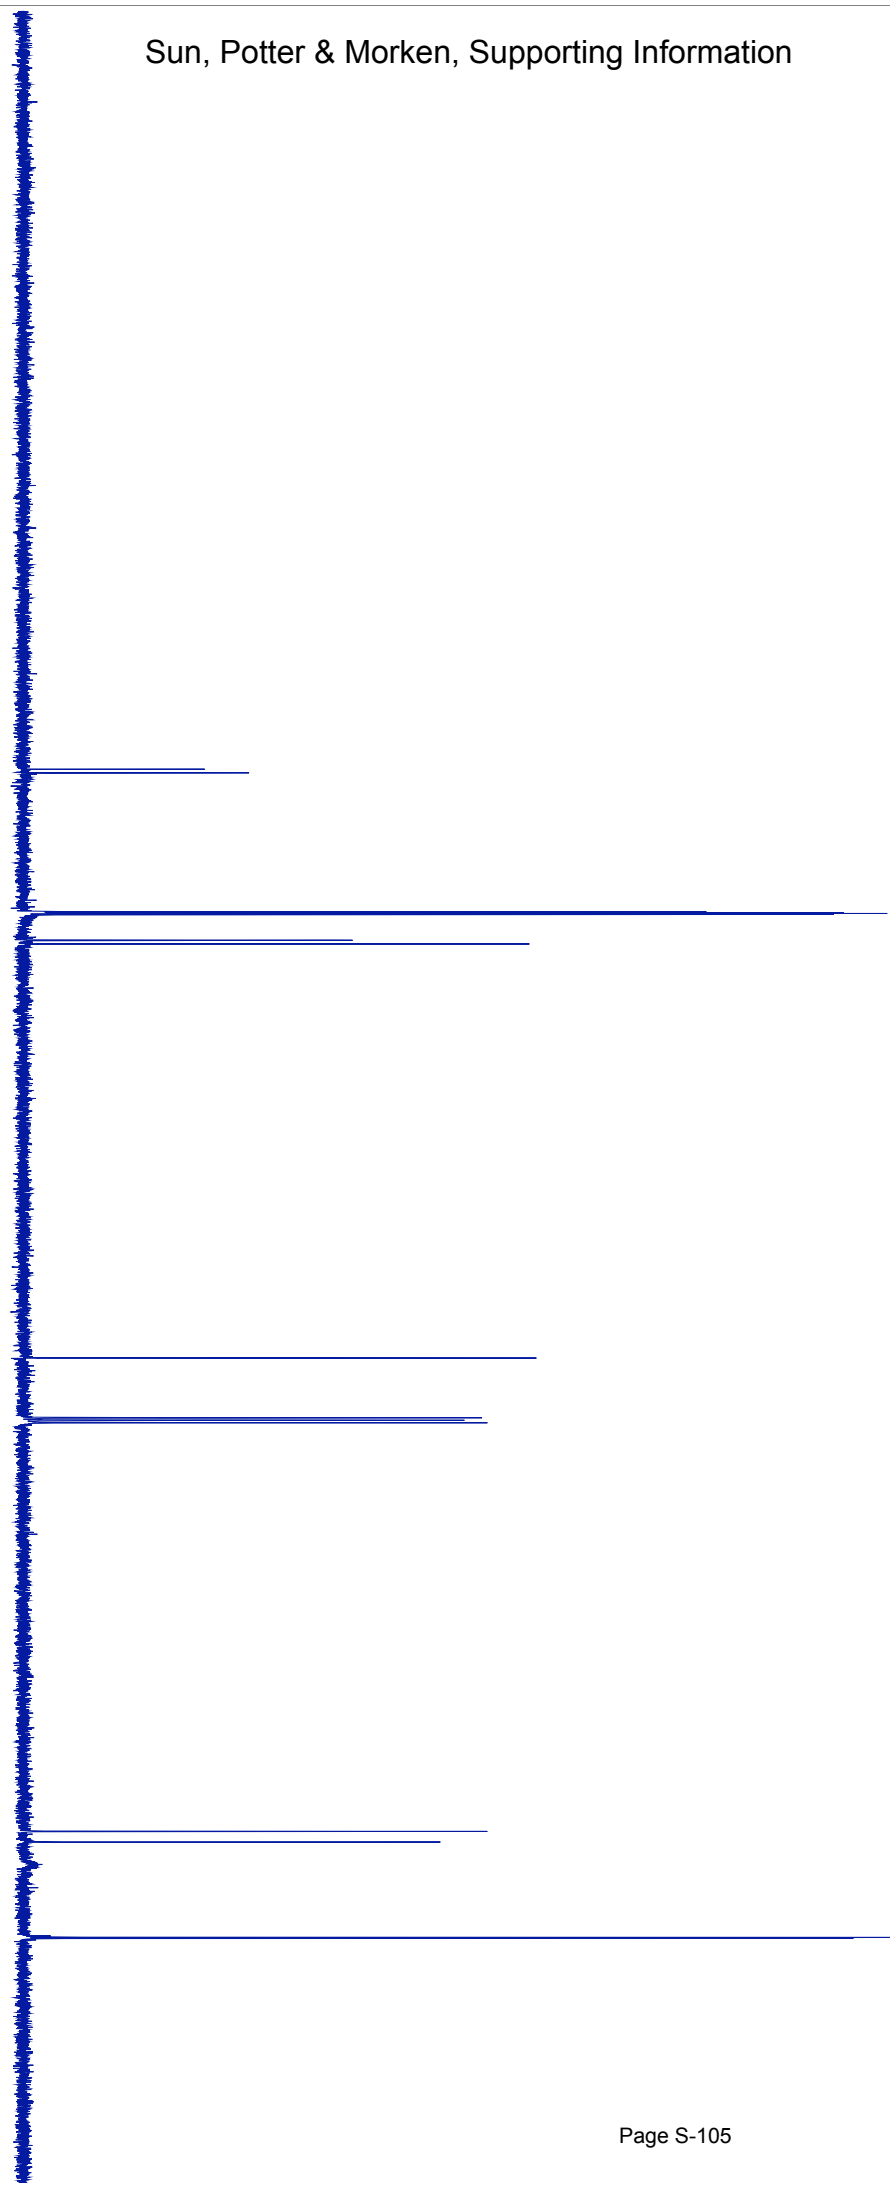

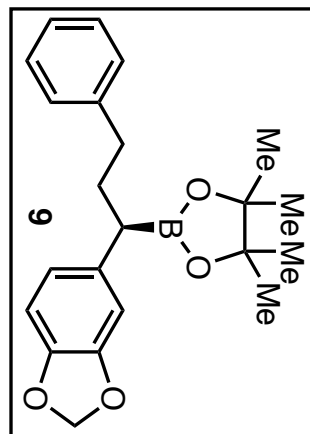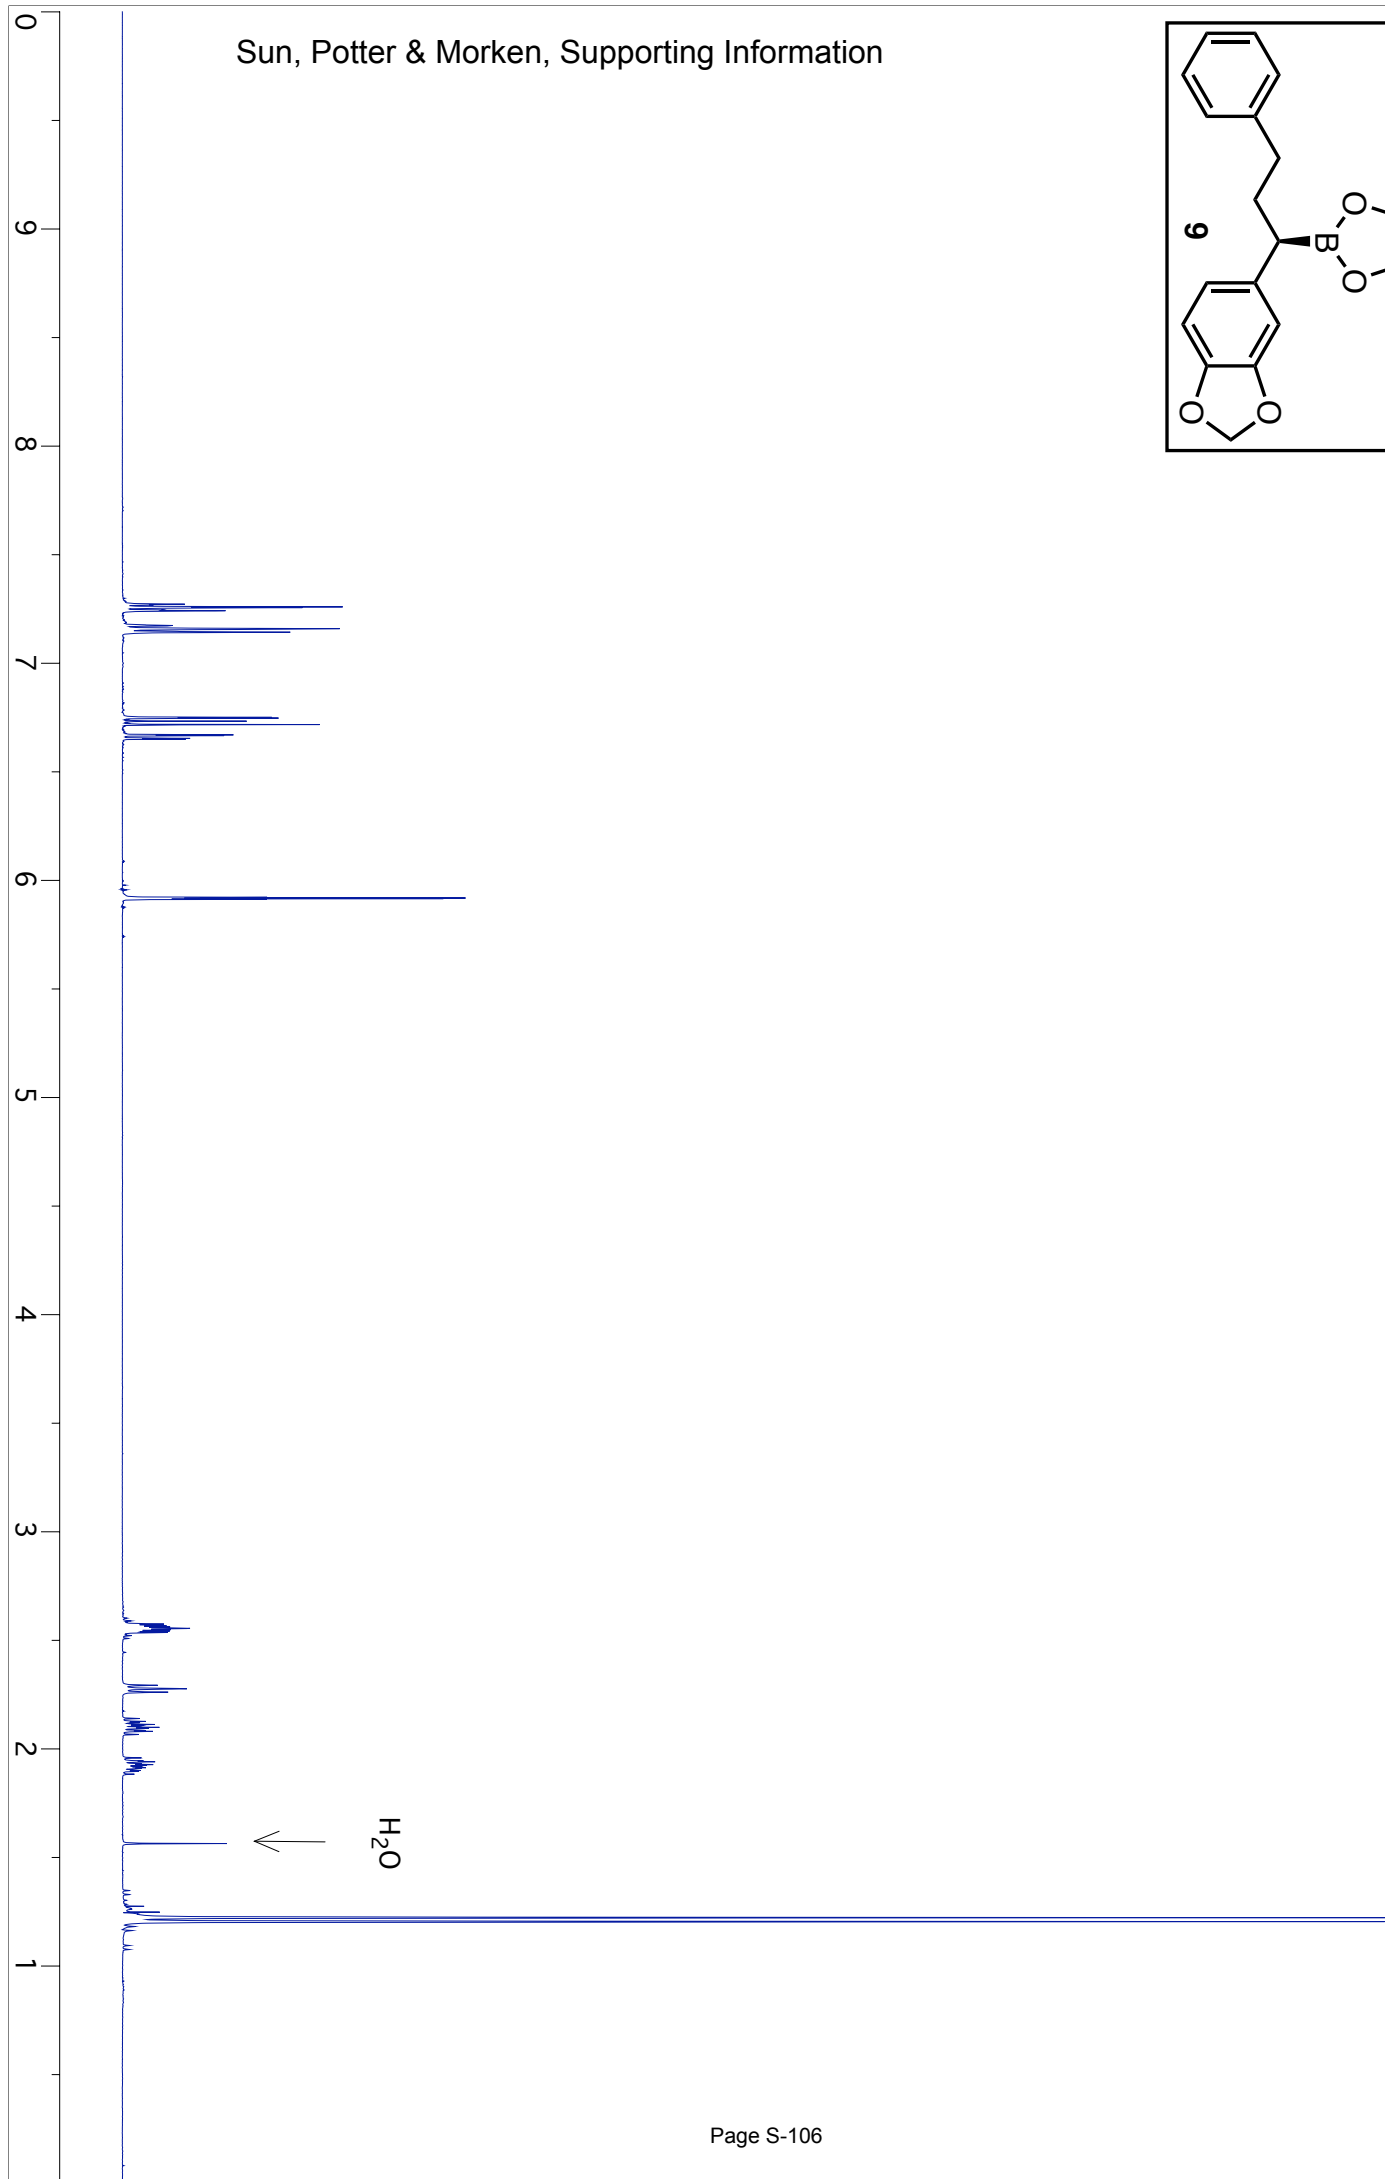

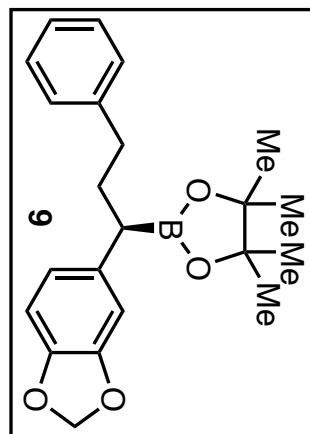

ppm 200  
180  
160  
140  
120  
100  
80  
60  
40  
20  
0

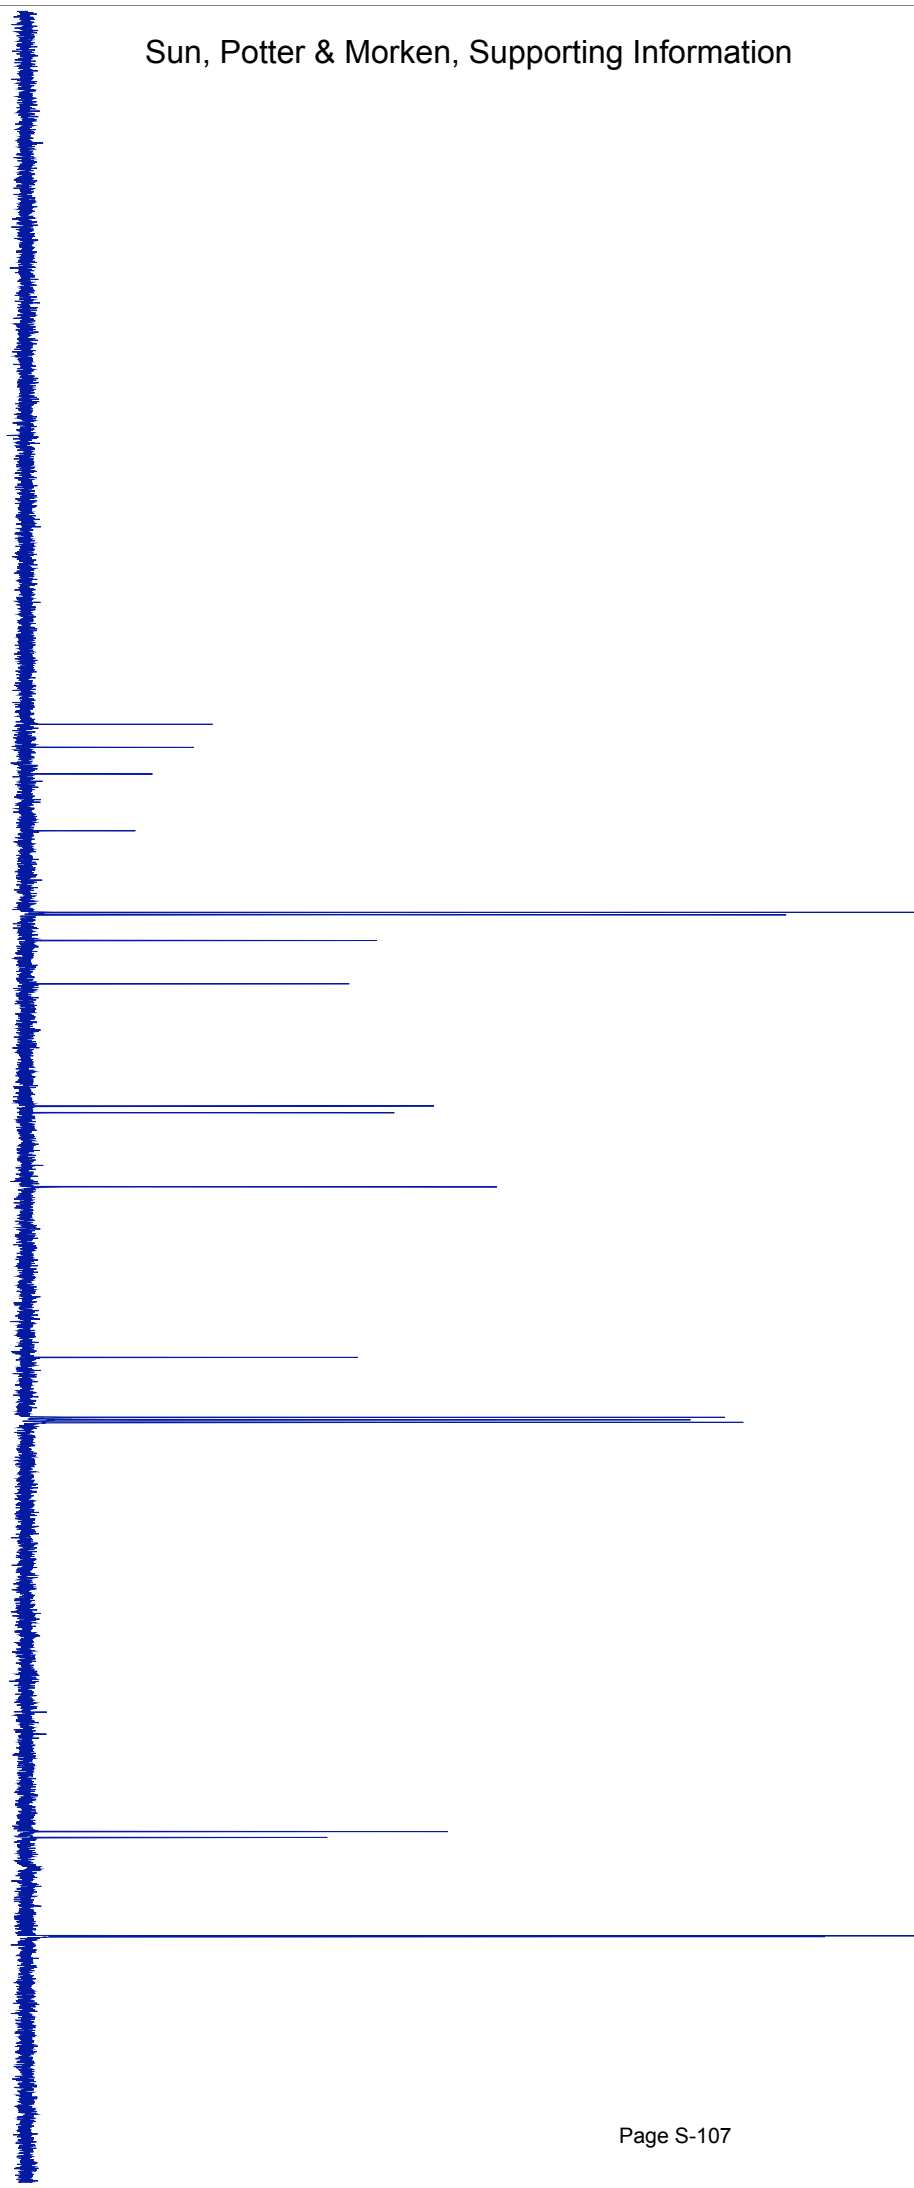

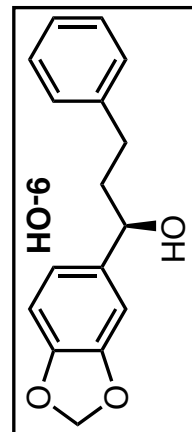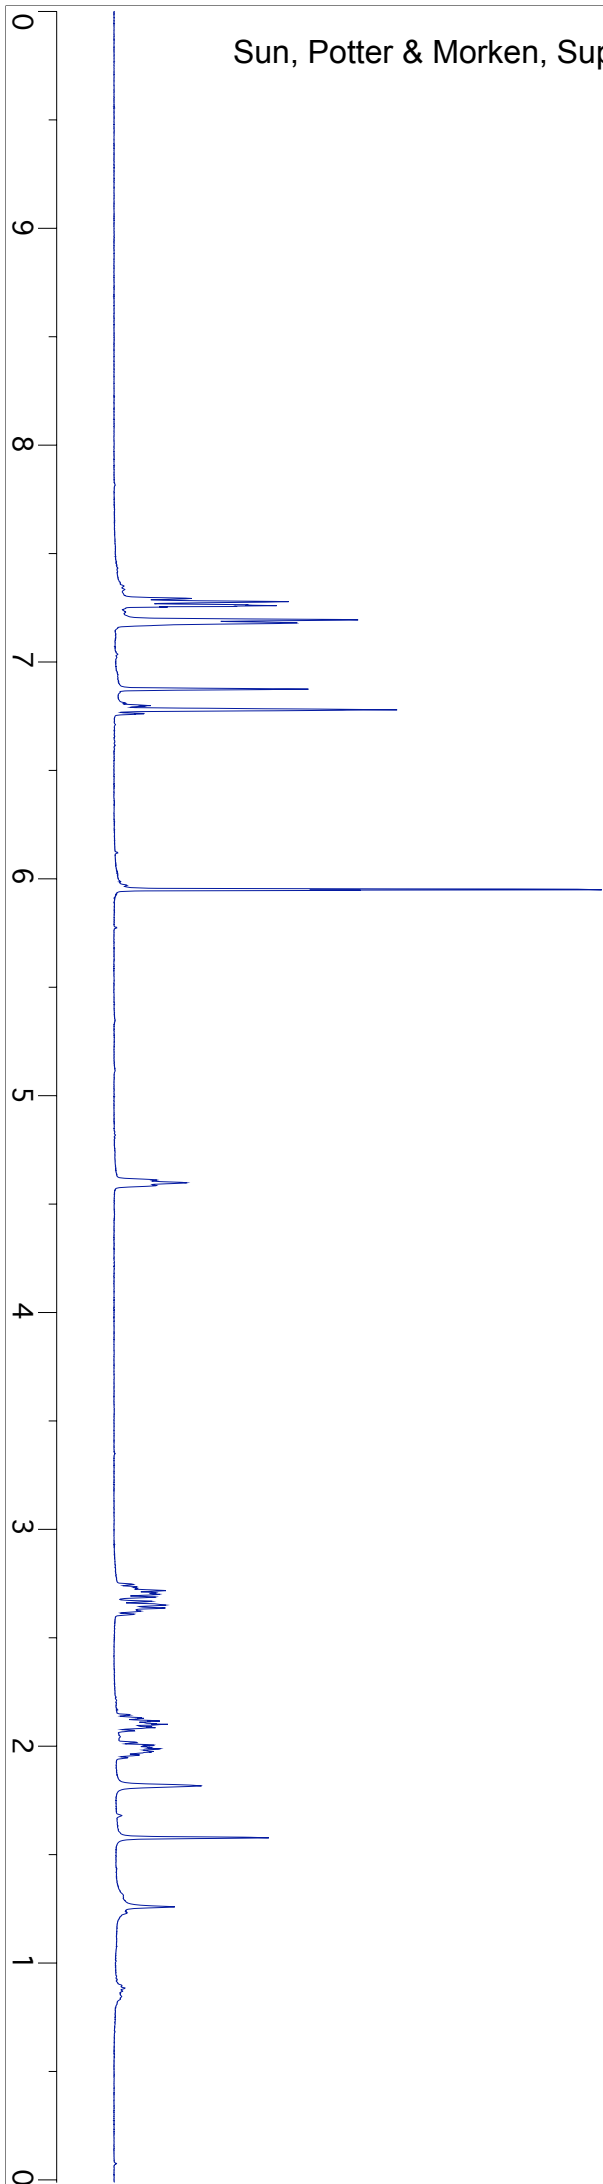

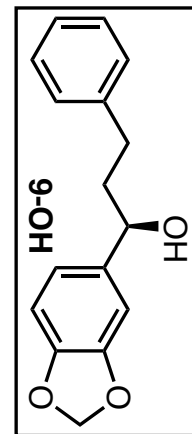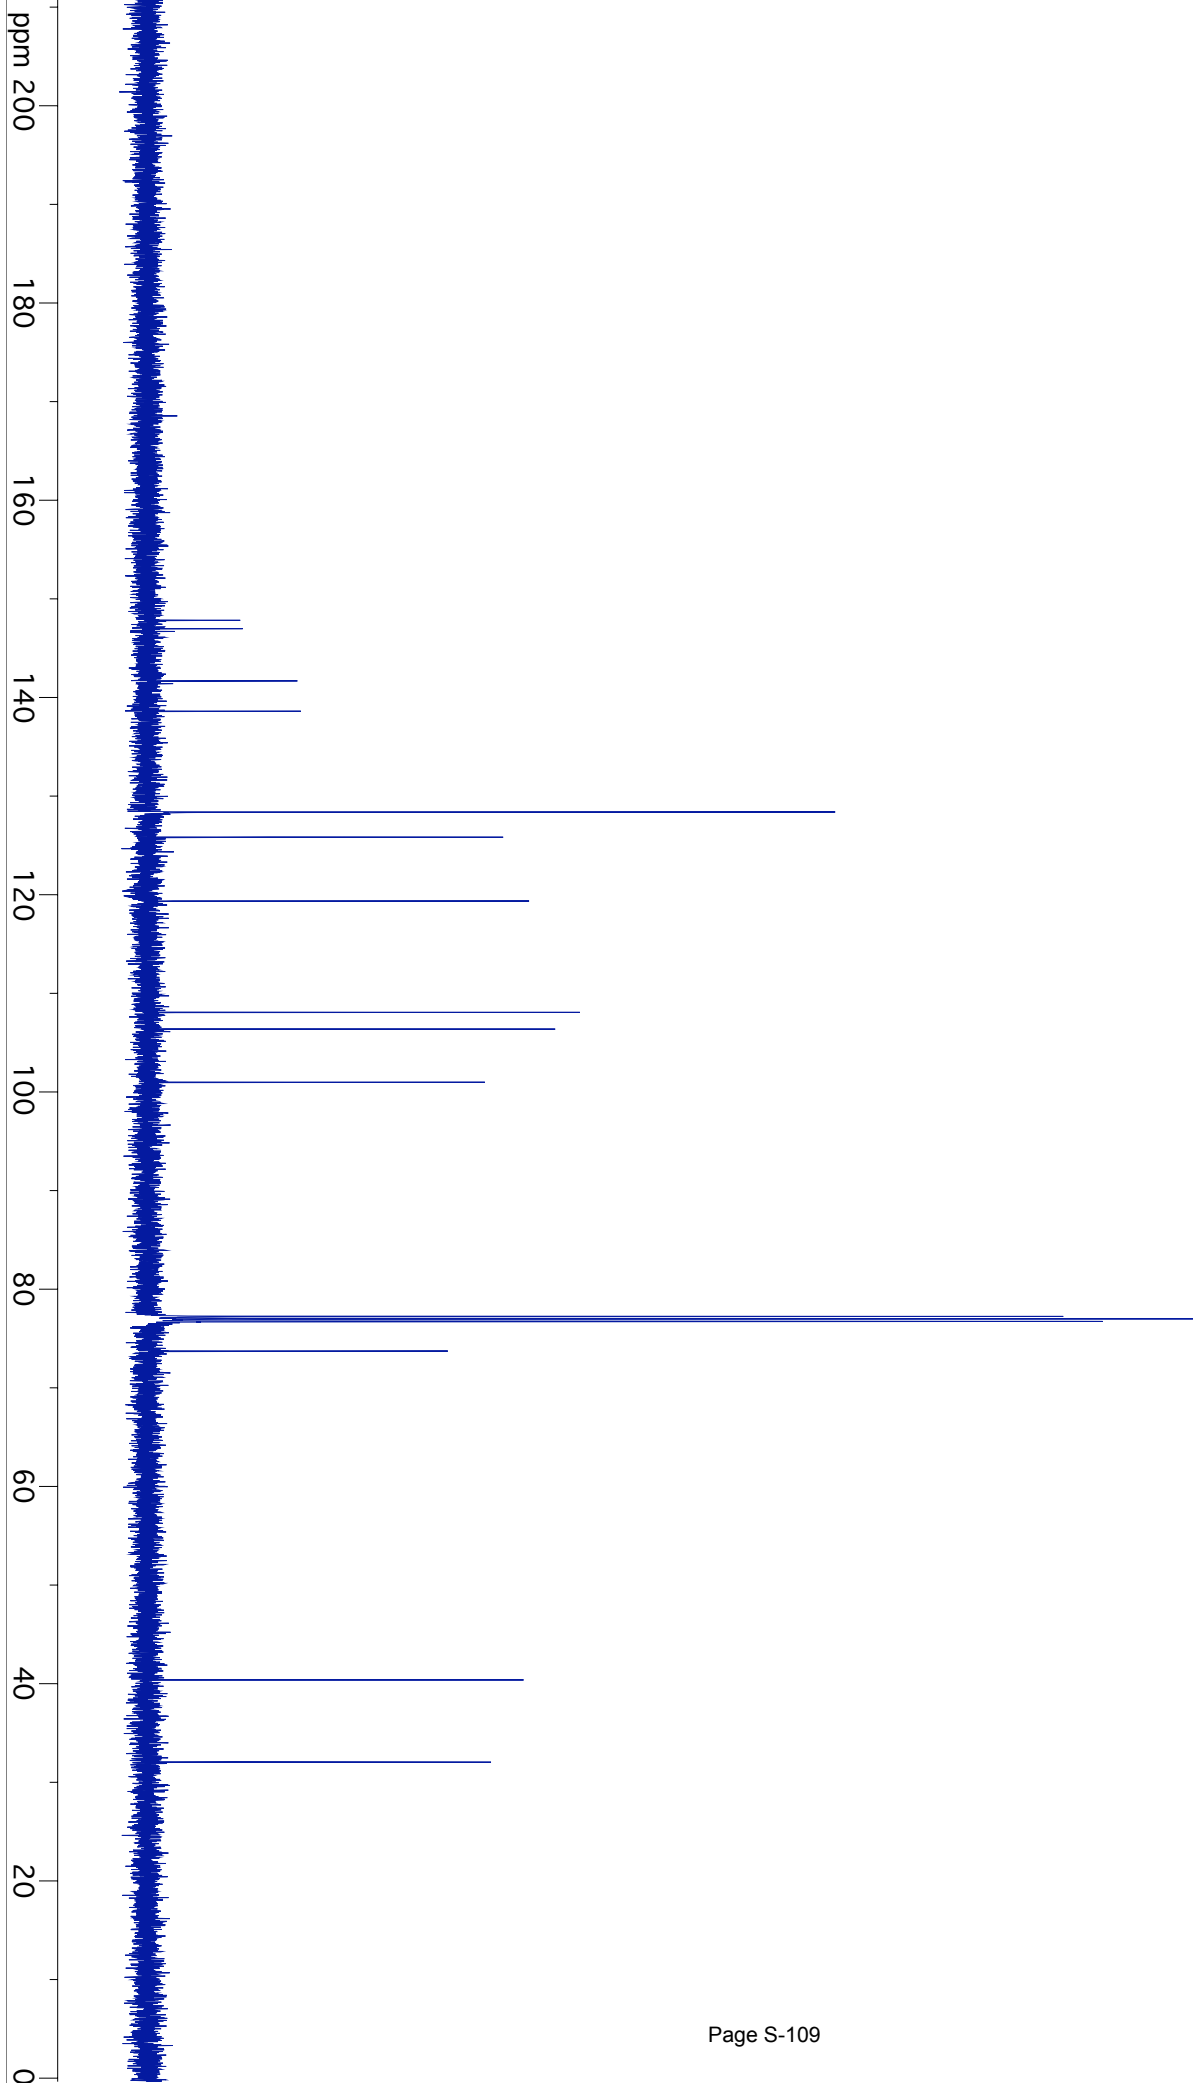

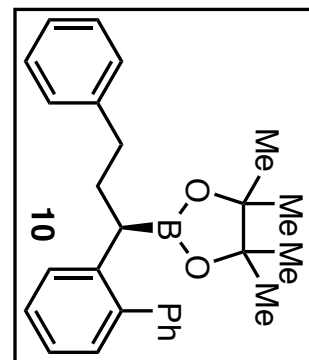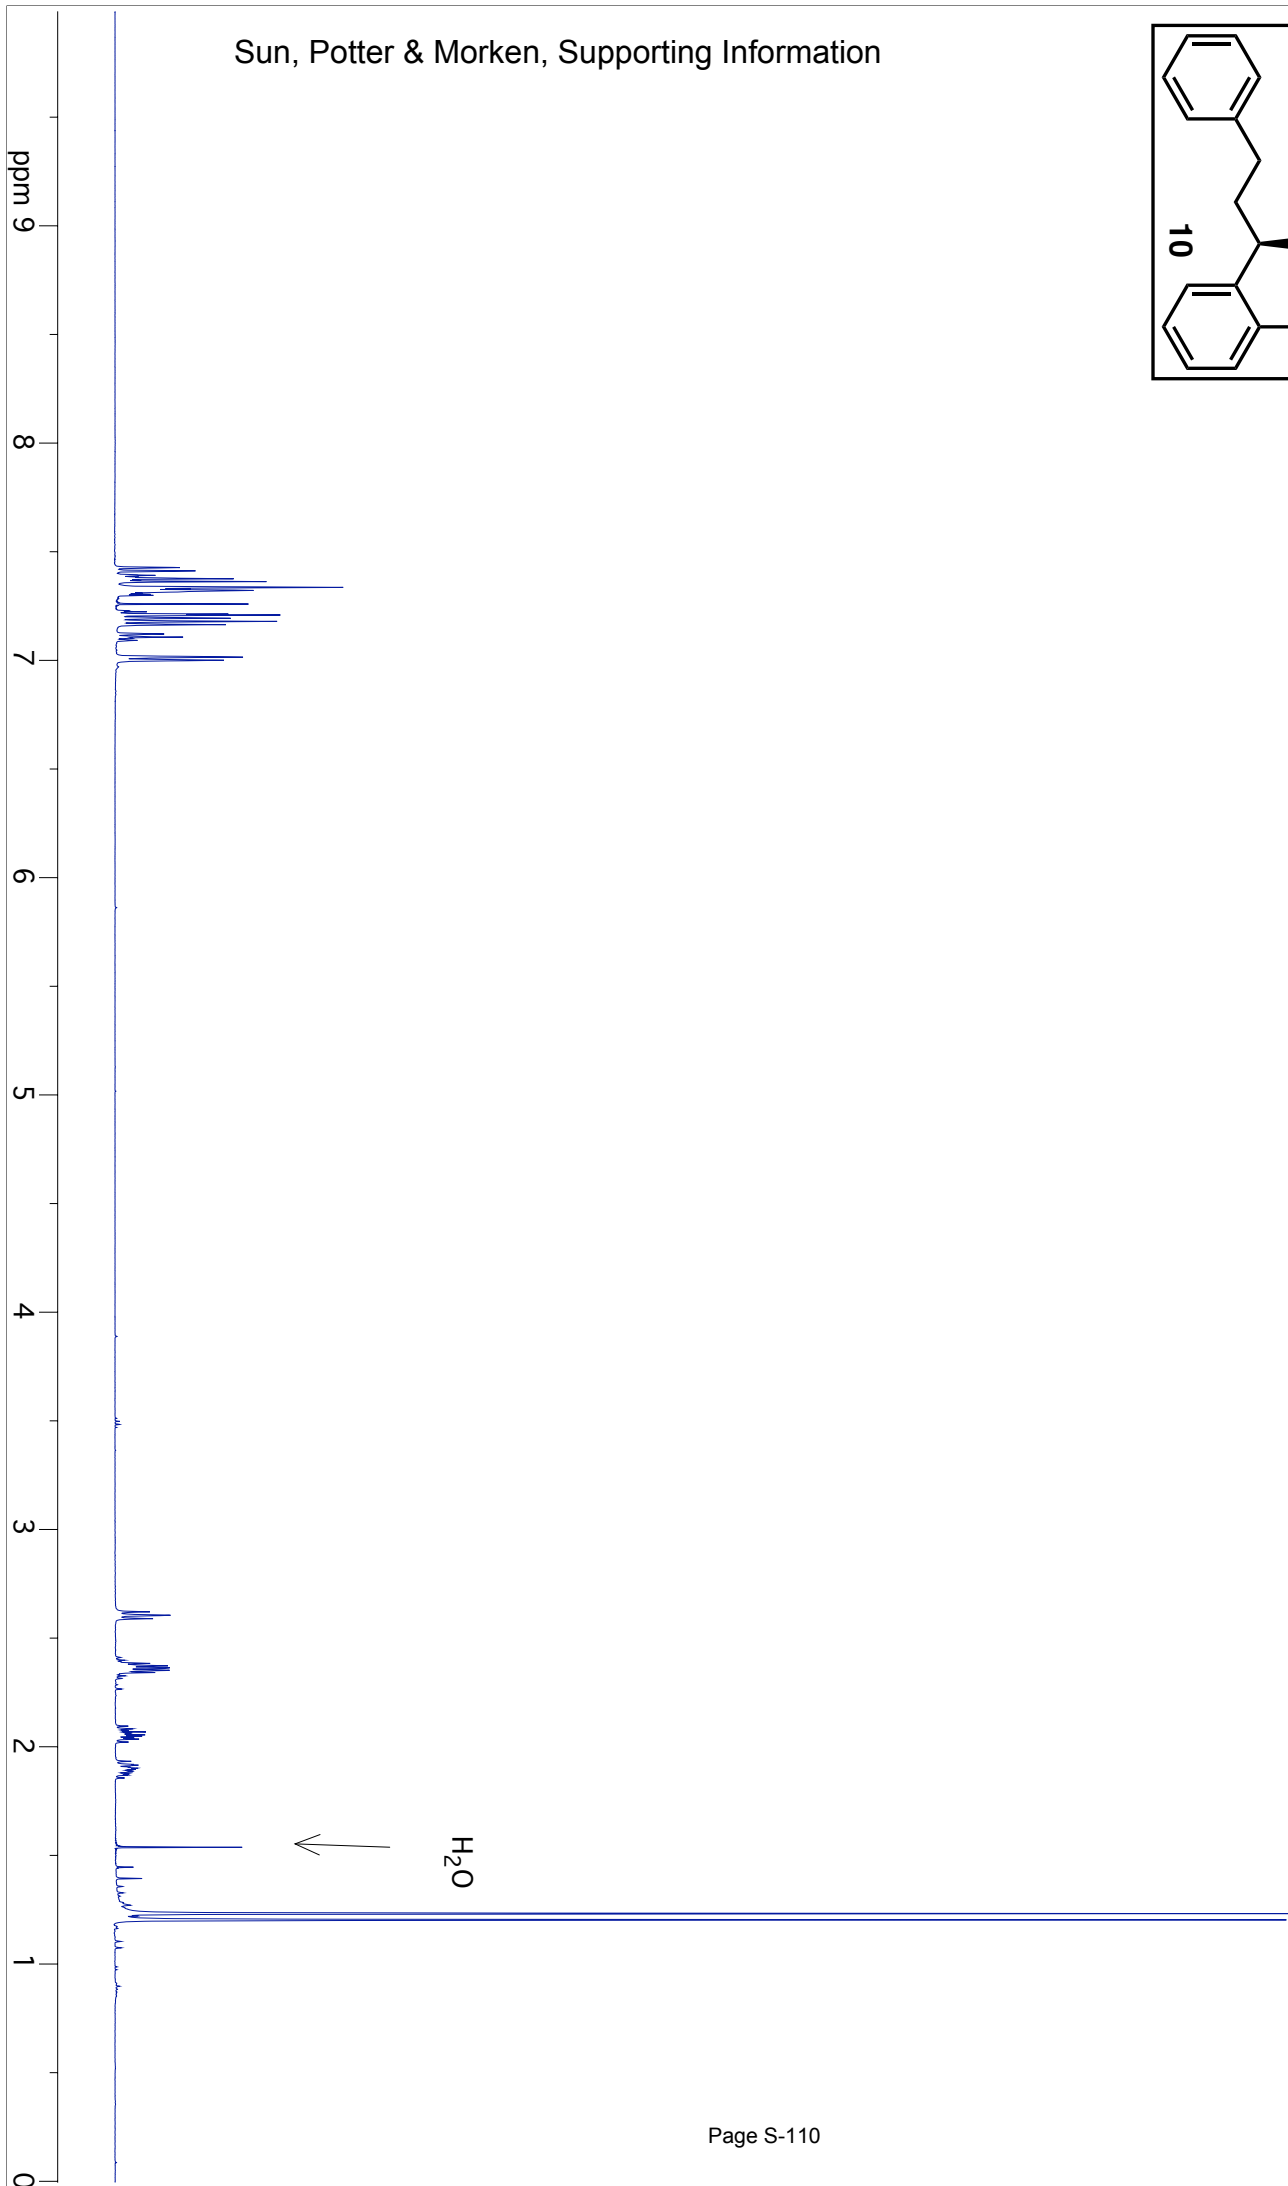

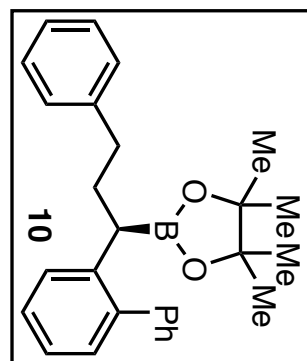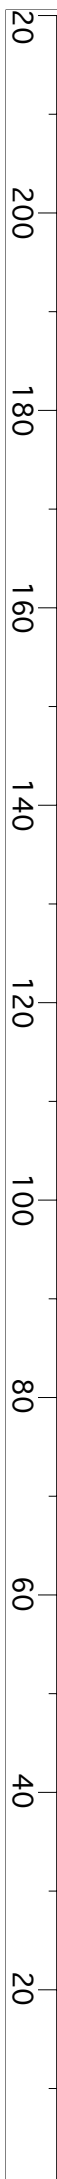

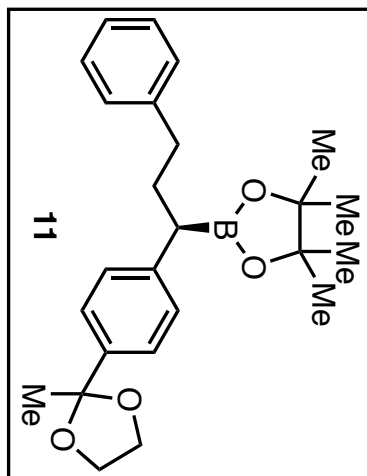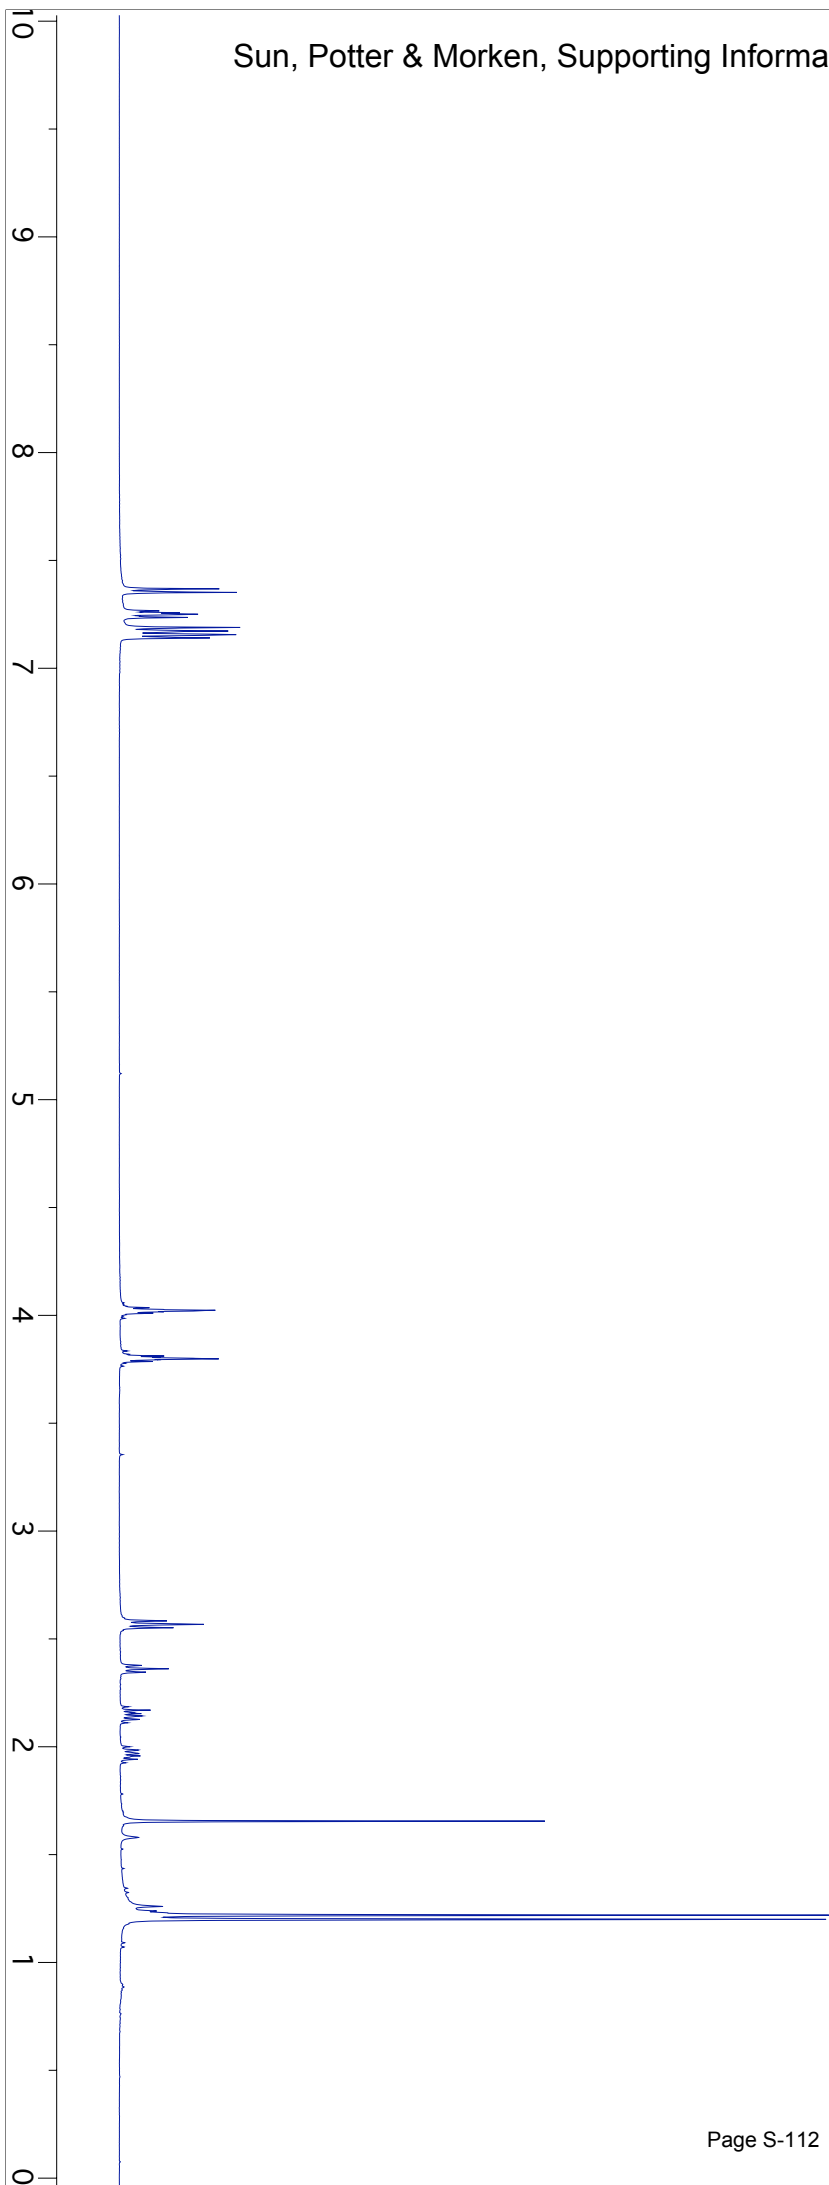



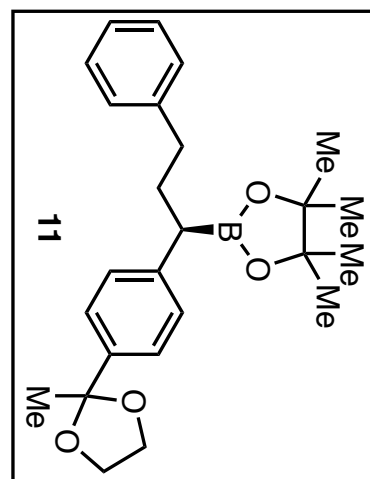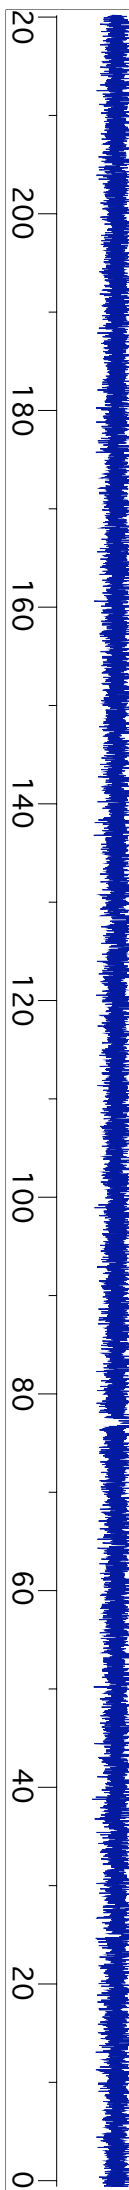

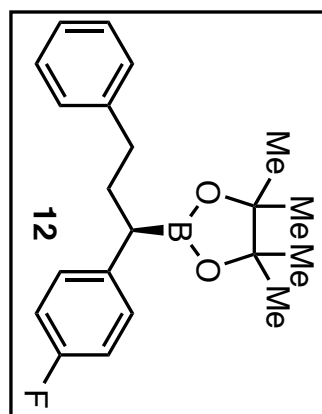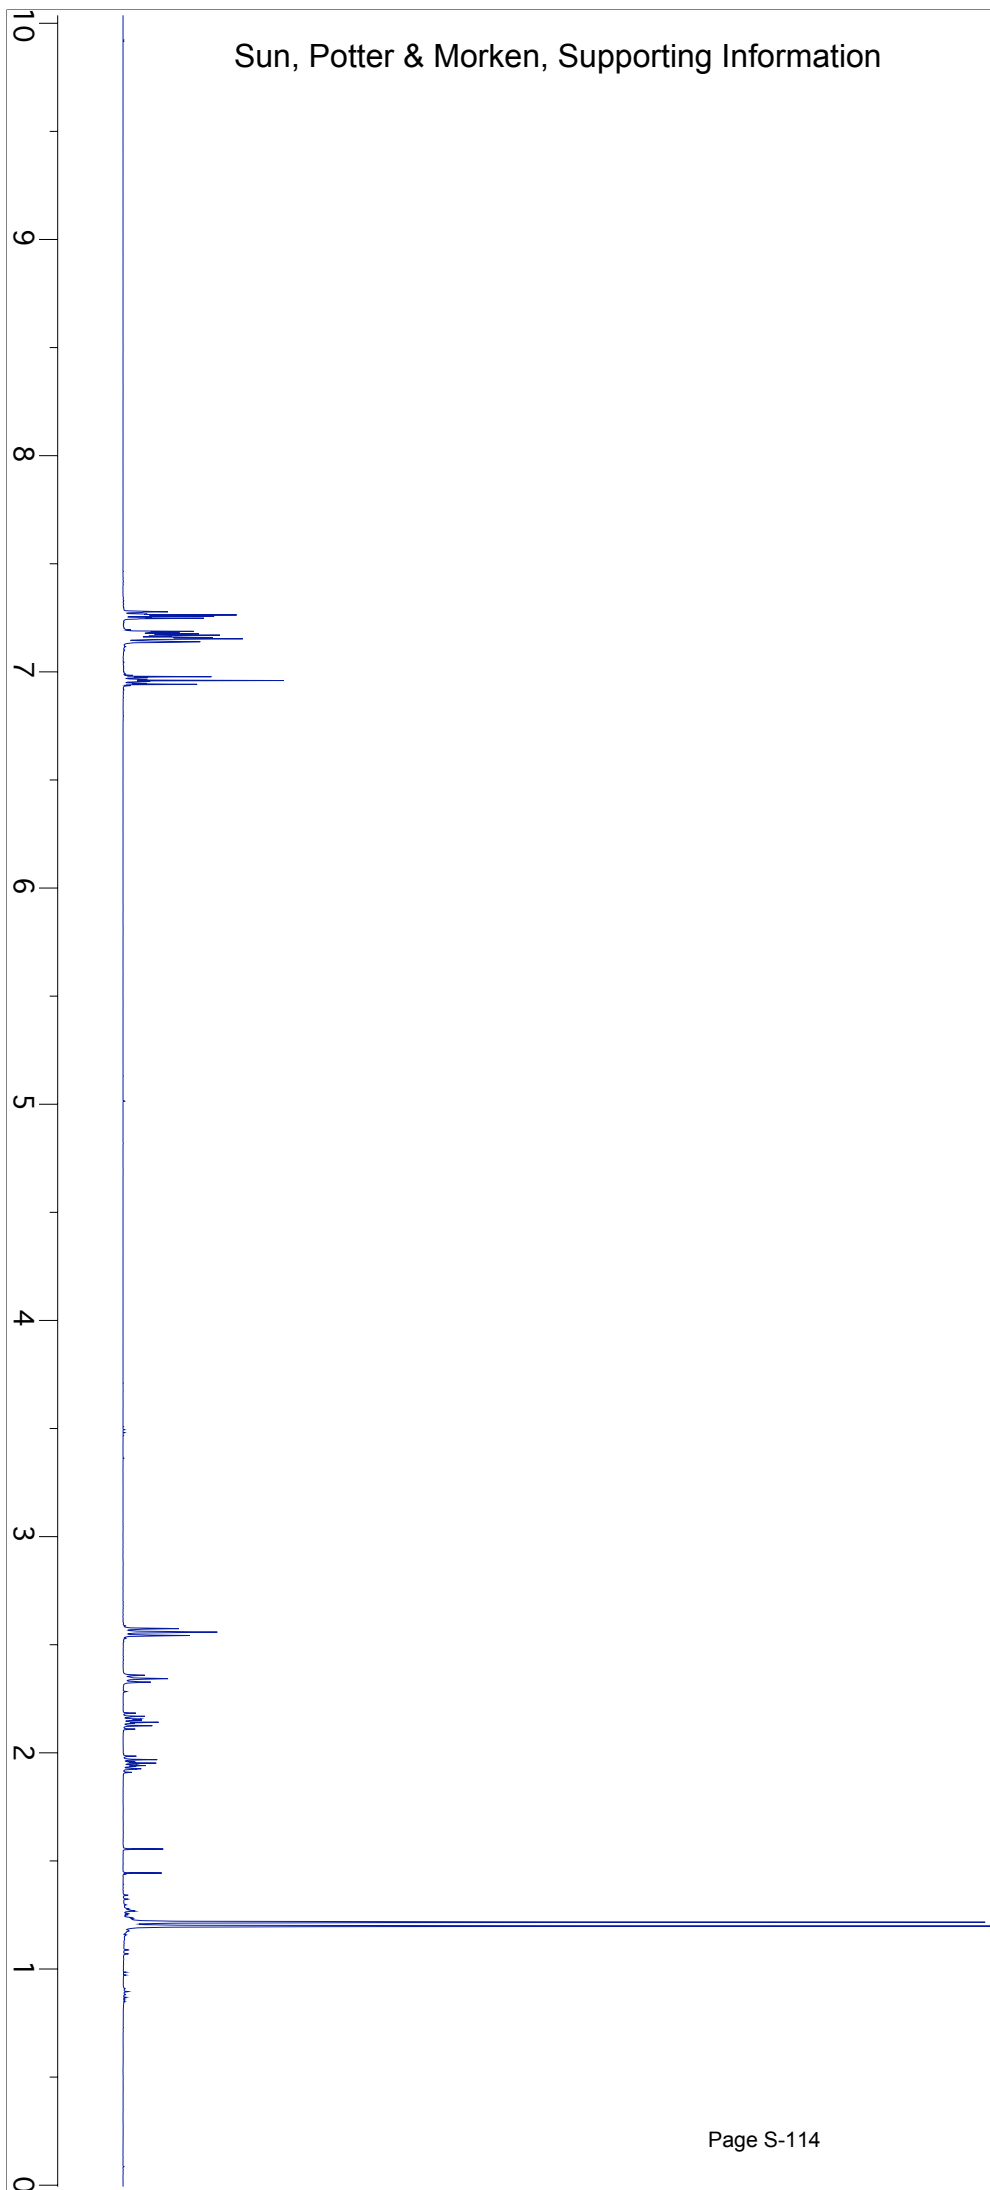

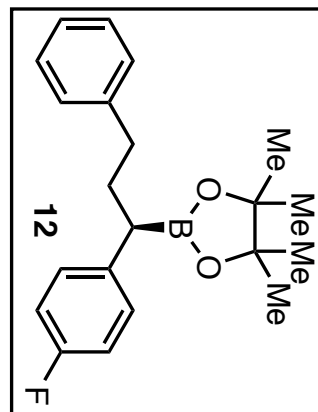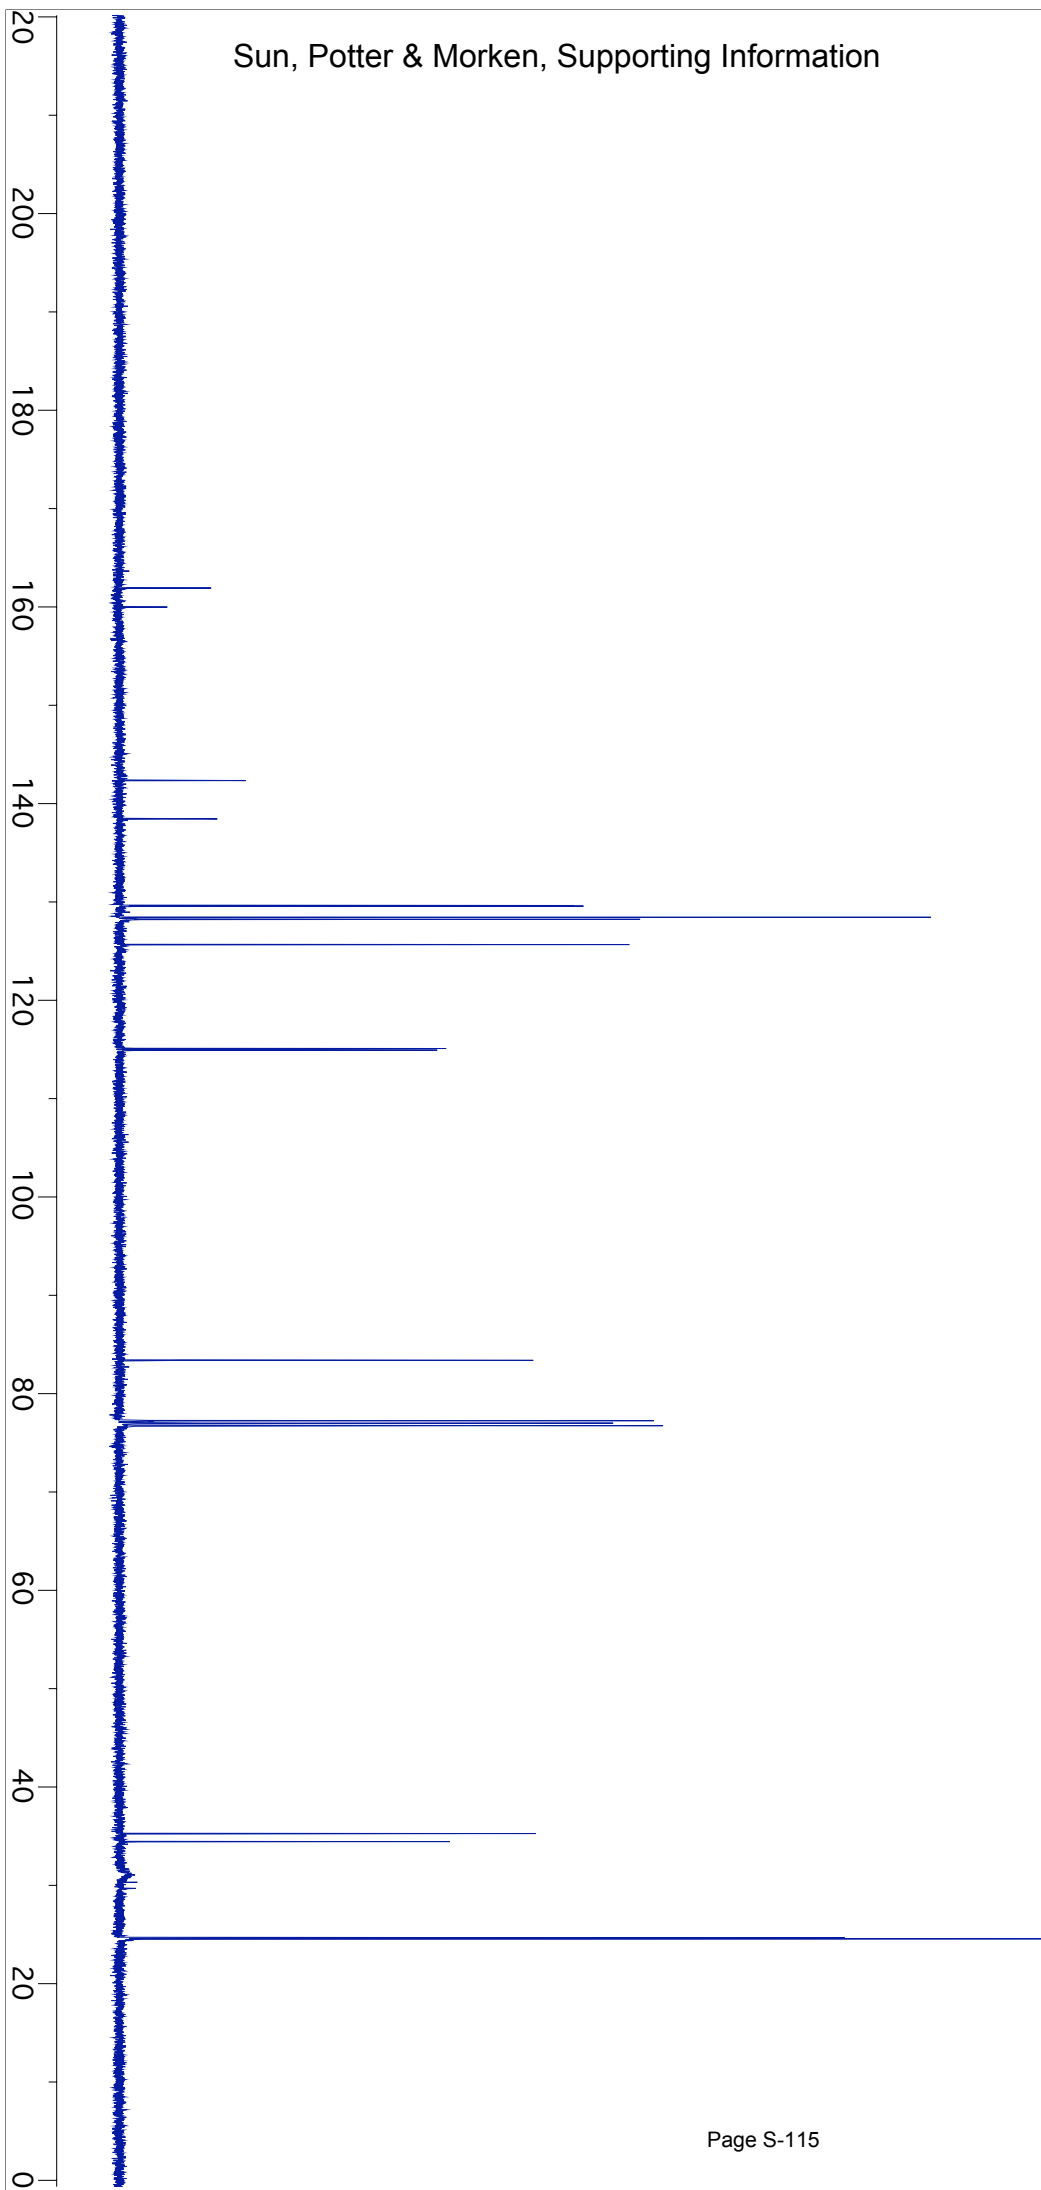

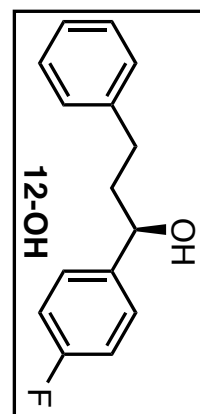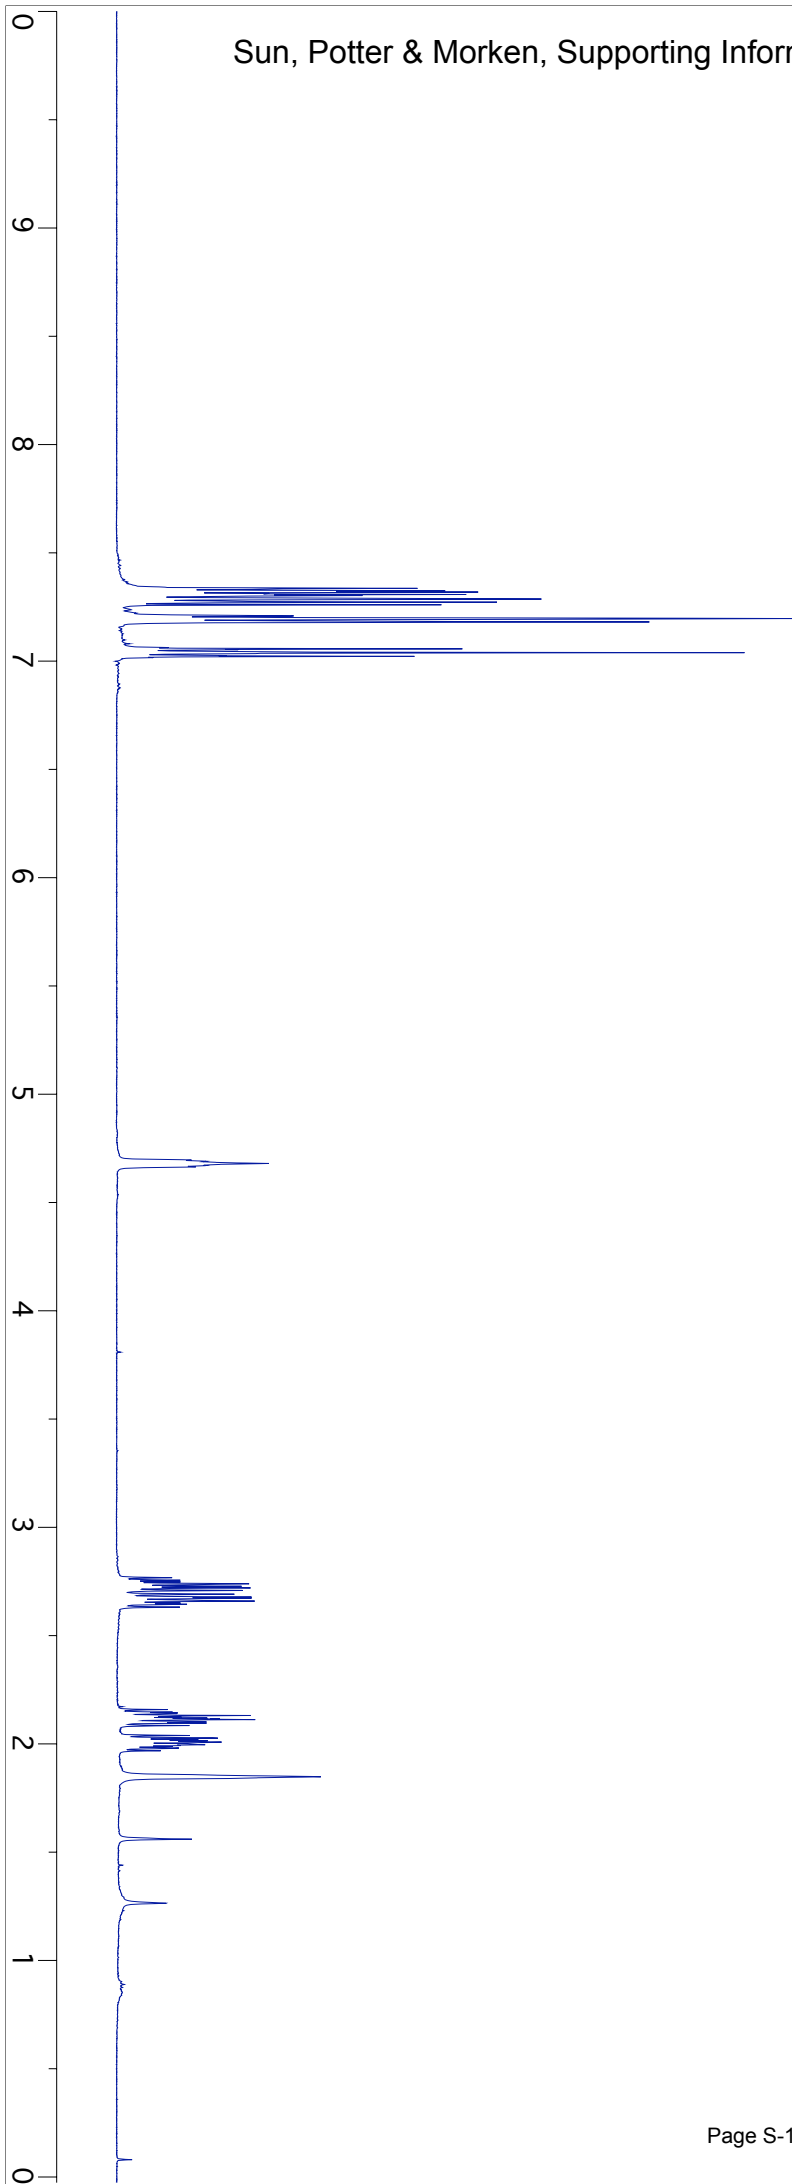

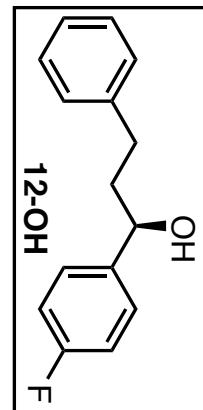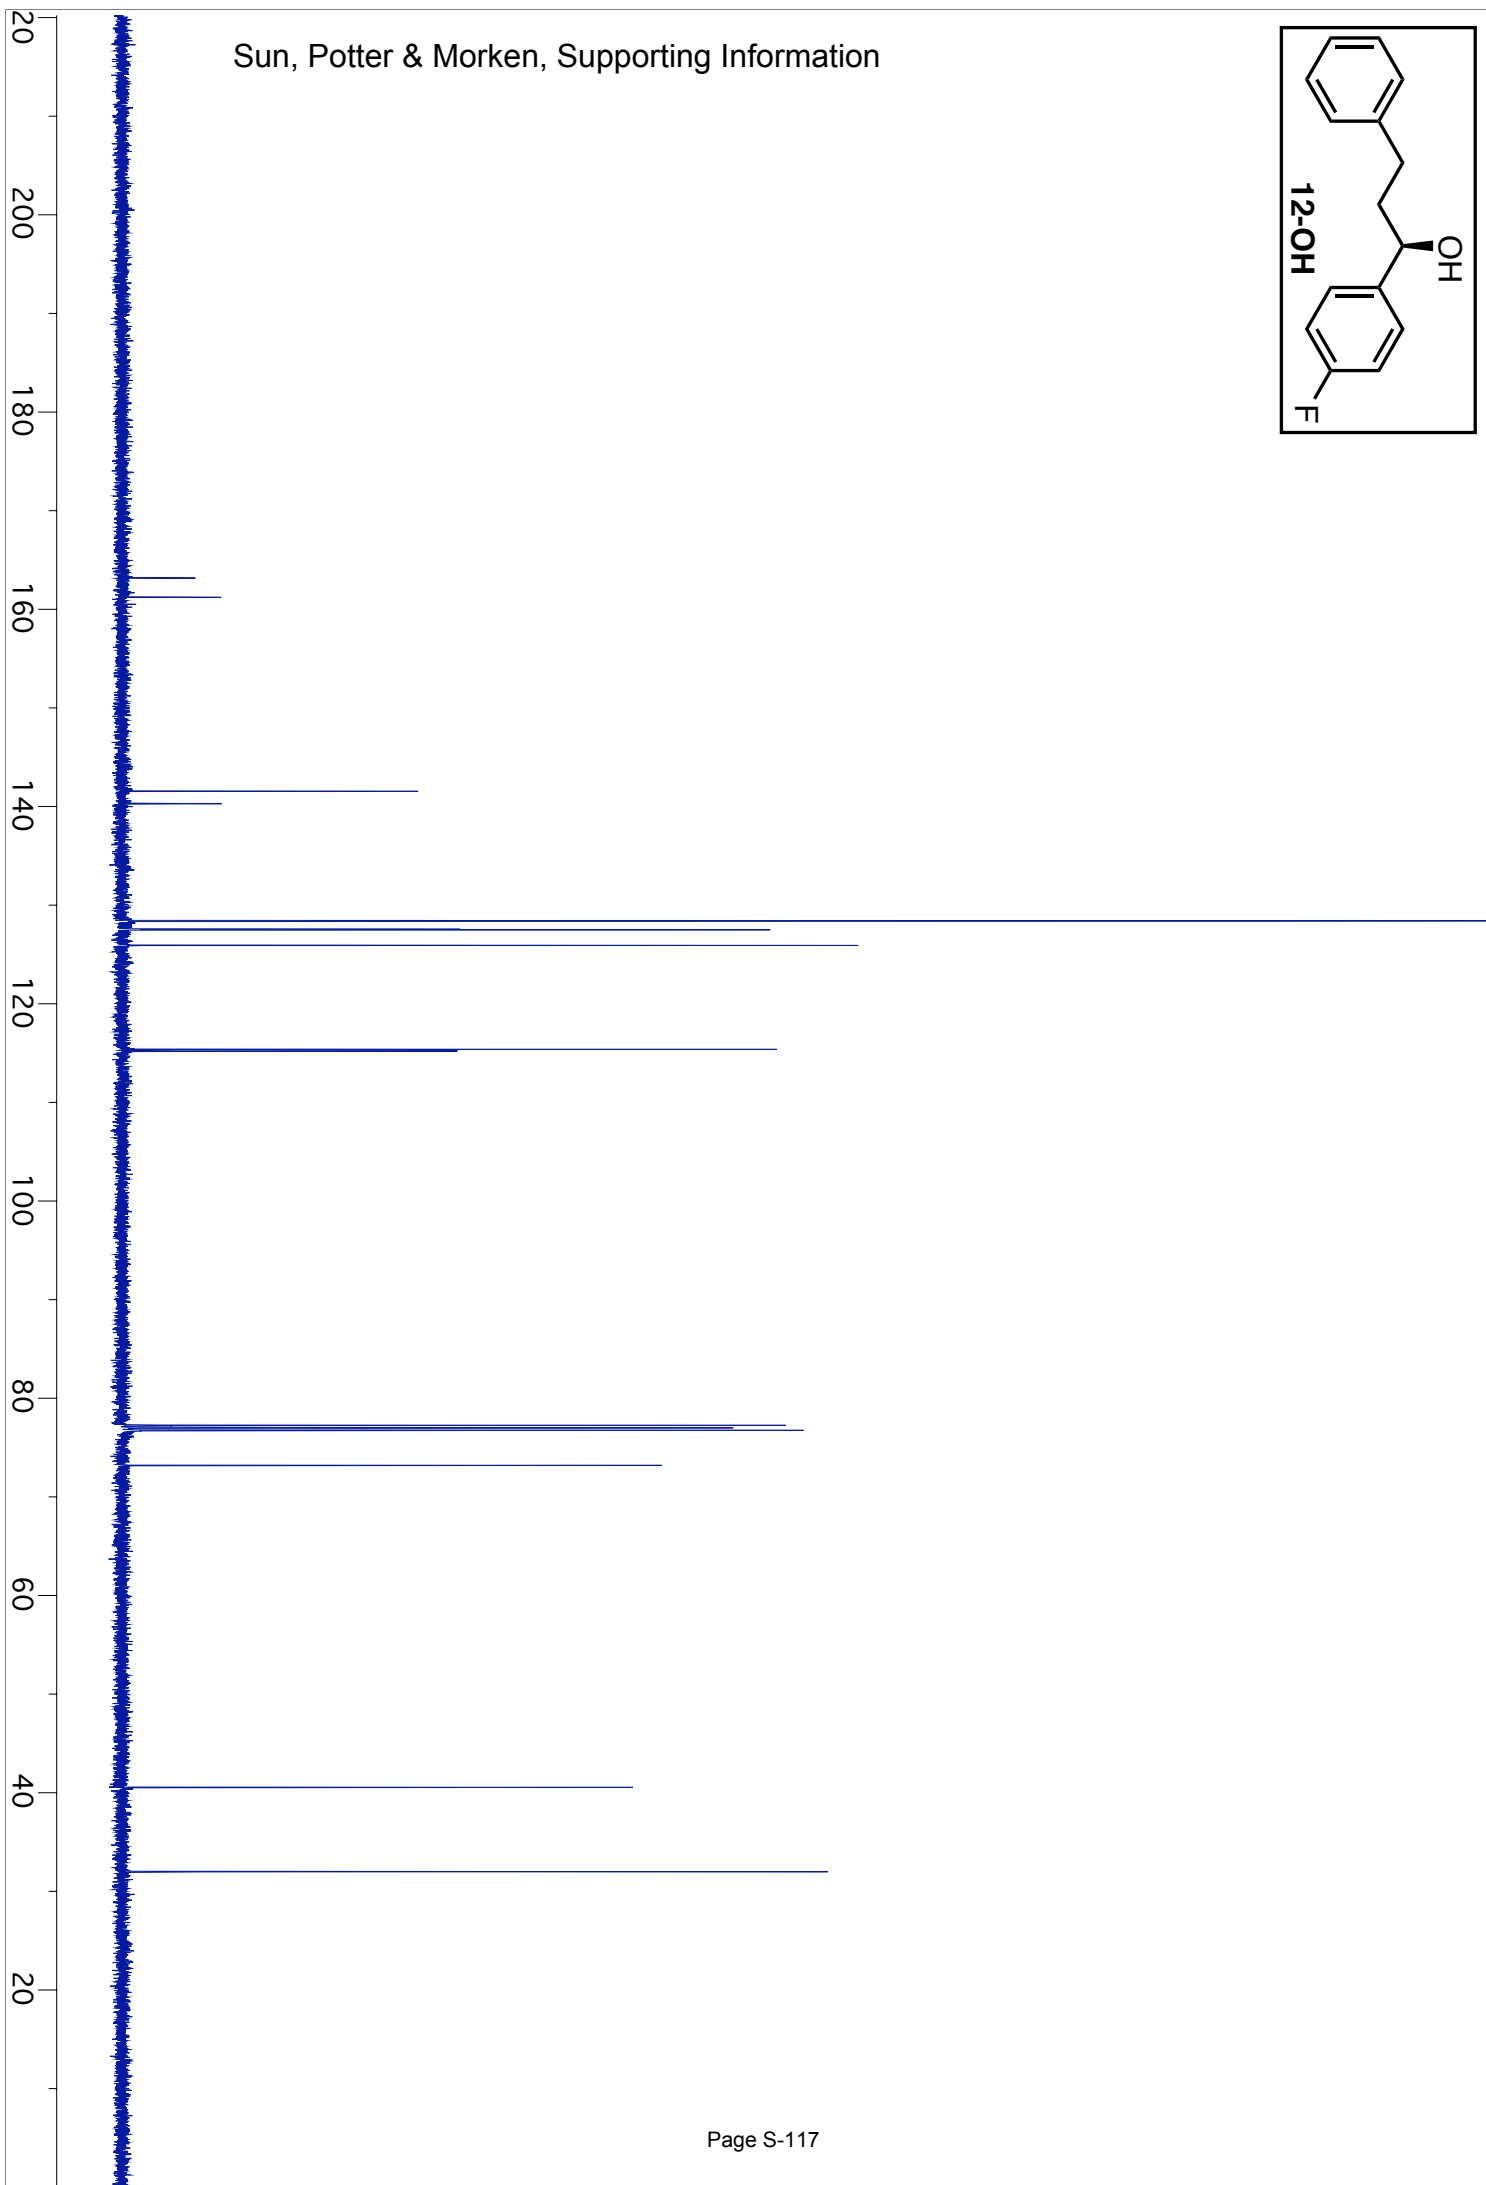

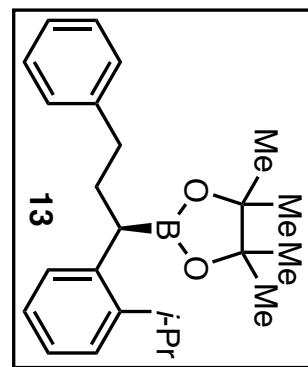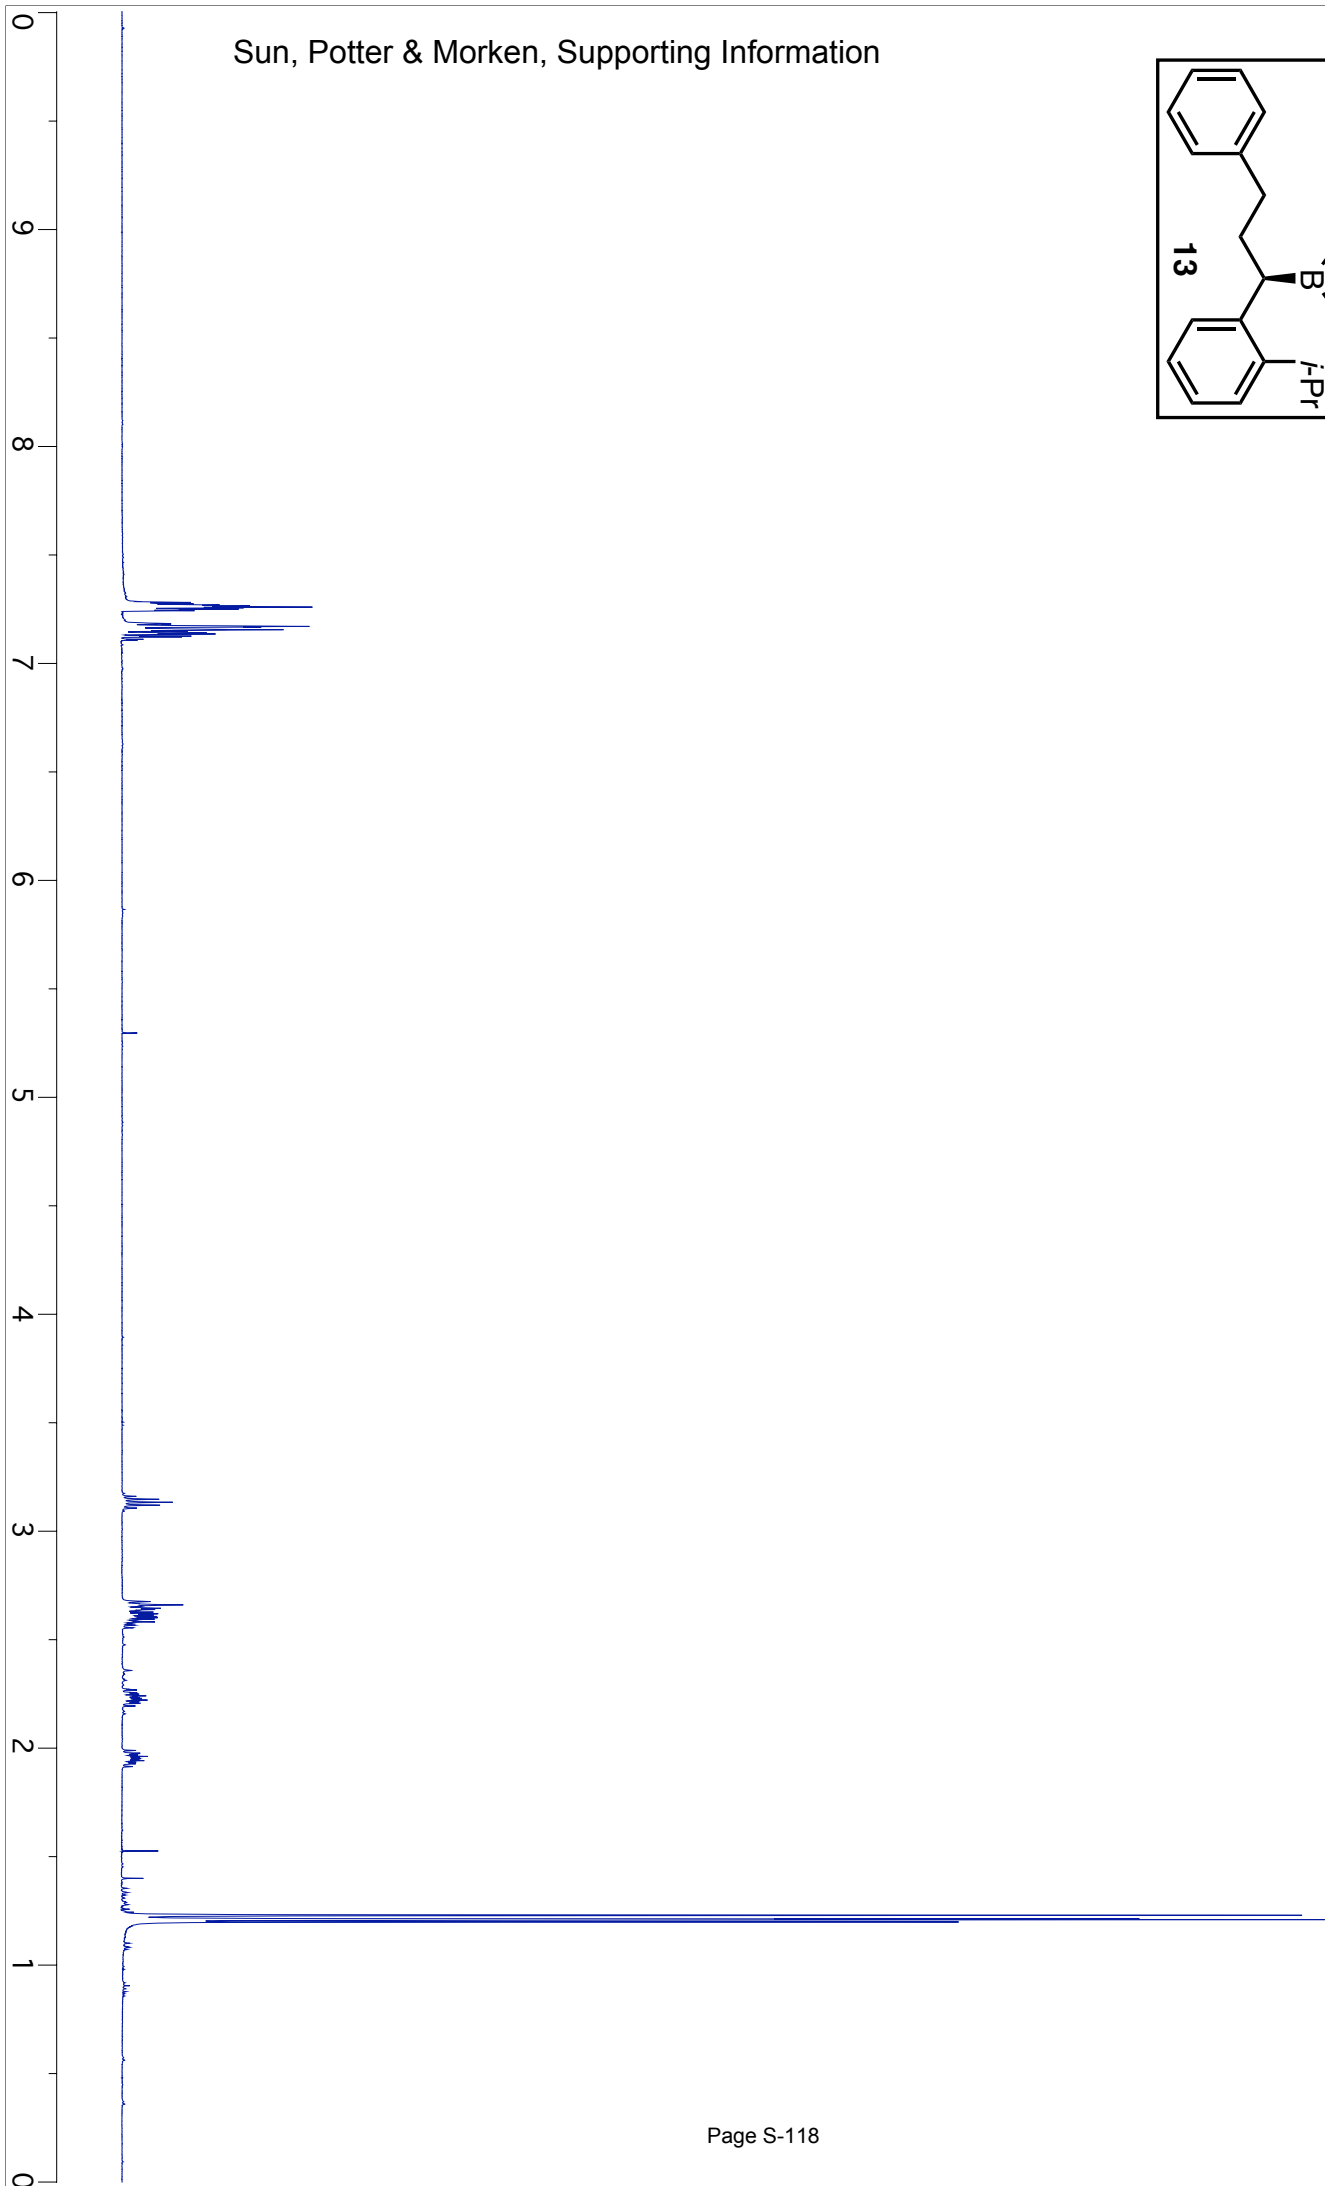

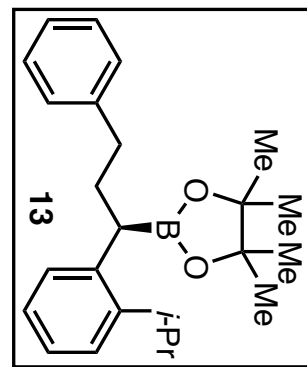

ppm 200  
180  
160  
140  
120  
100  
80  
60  
40  
20

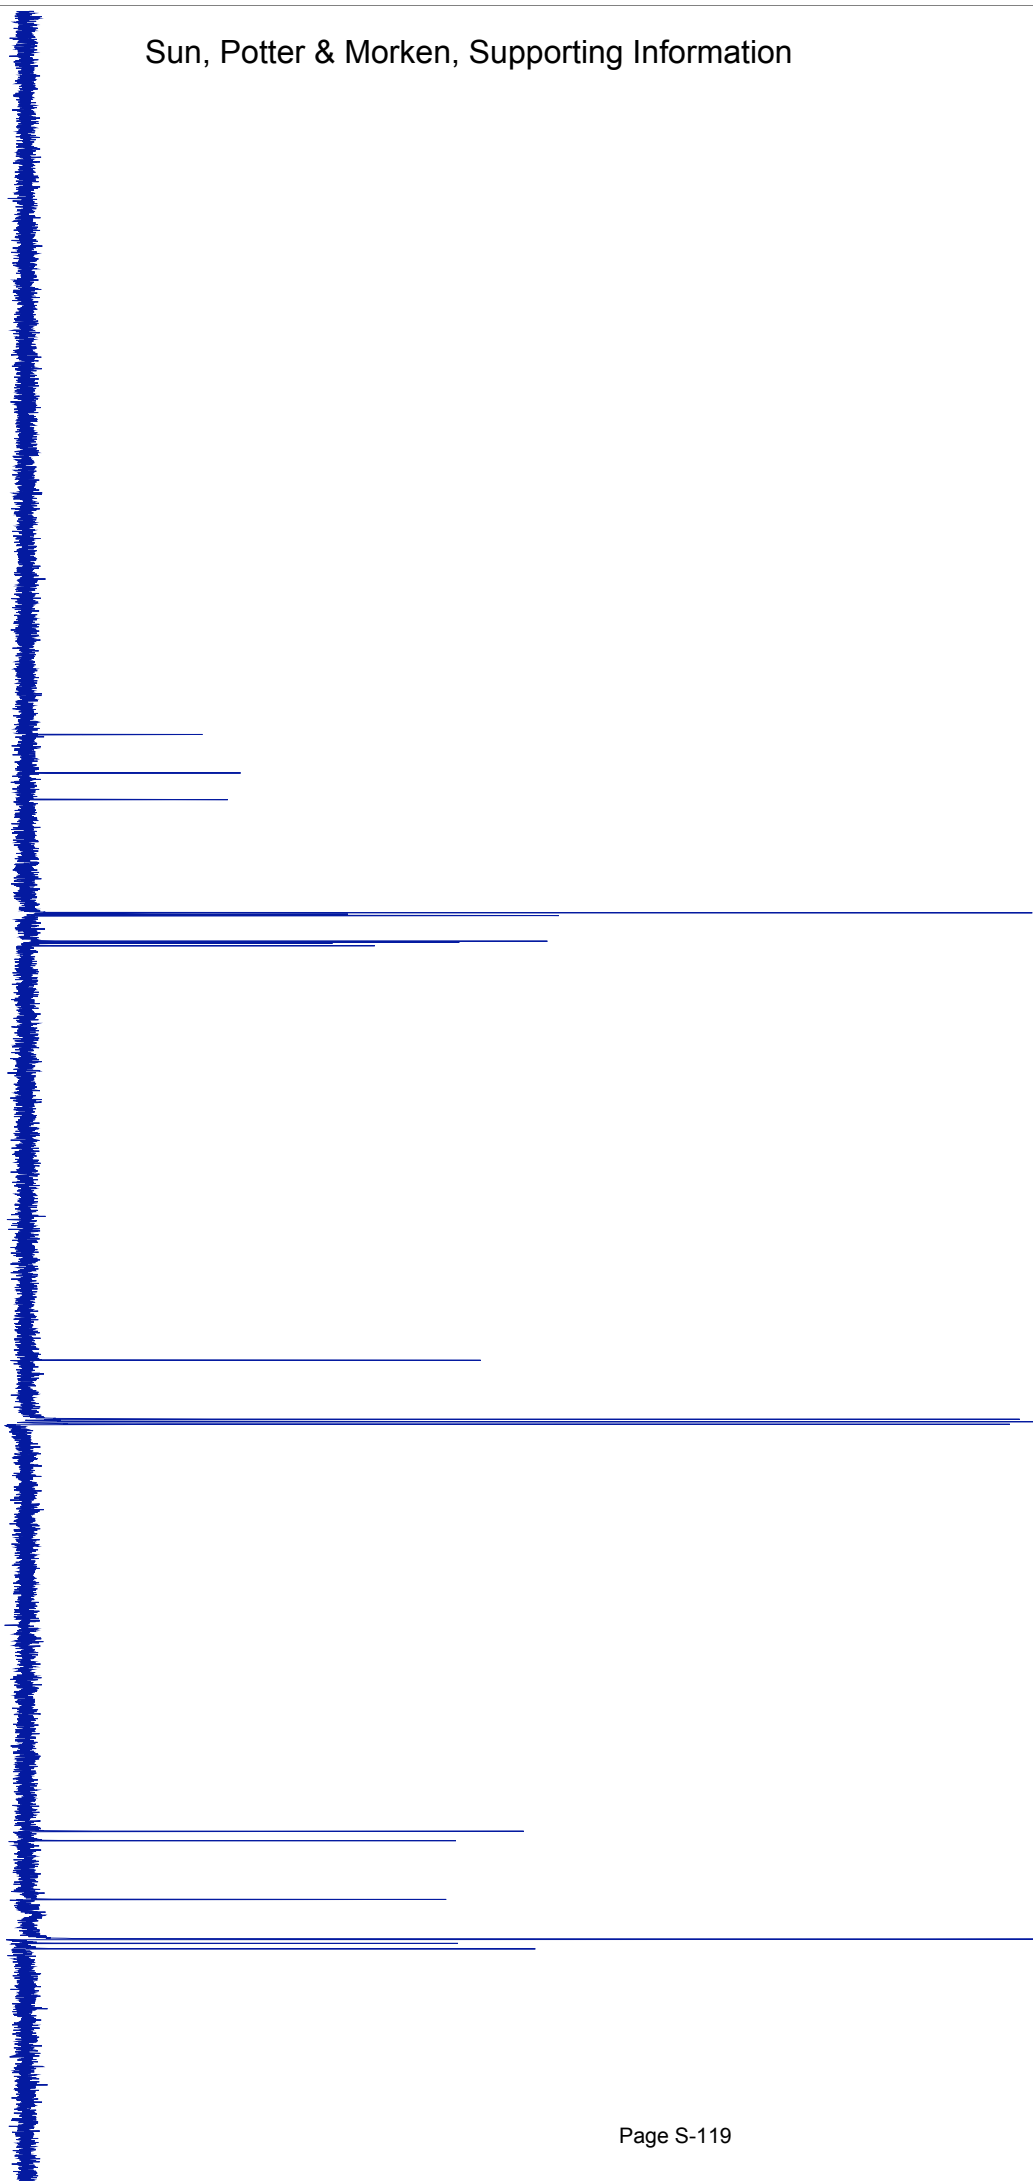

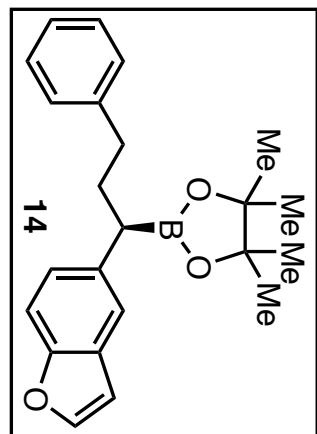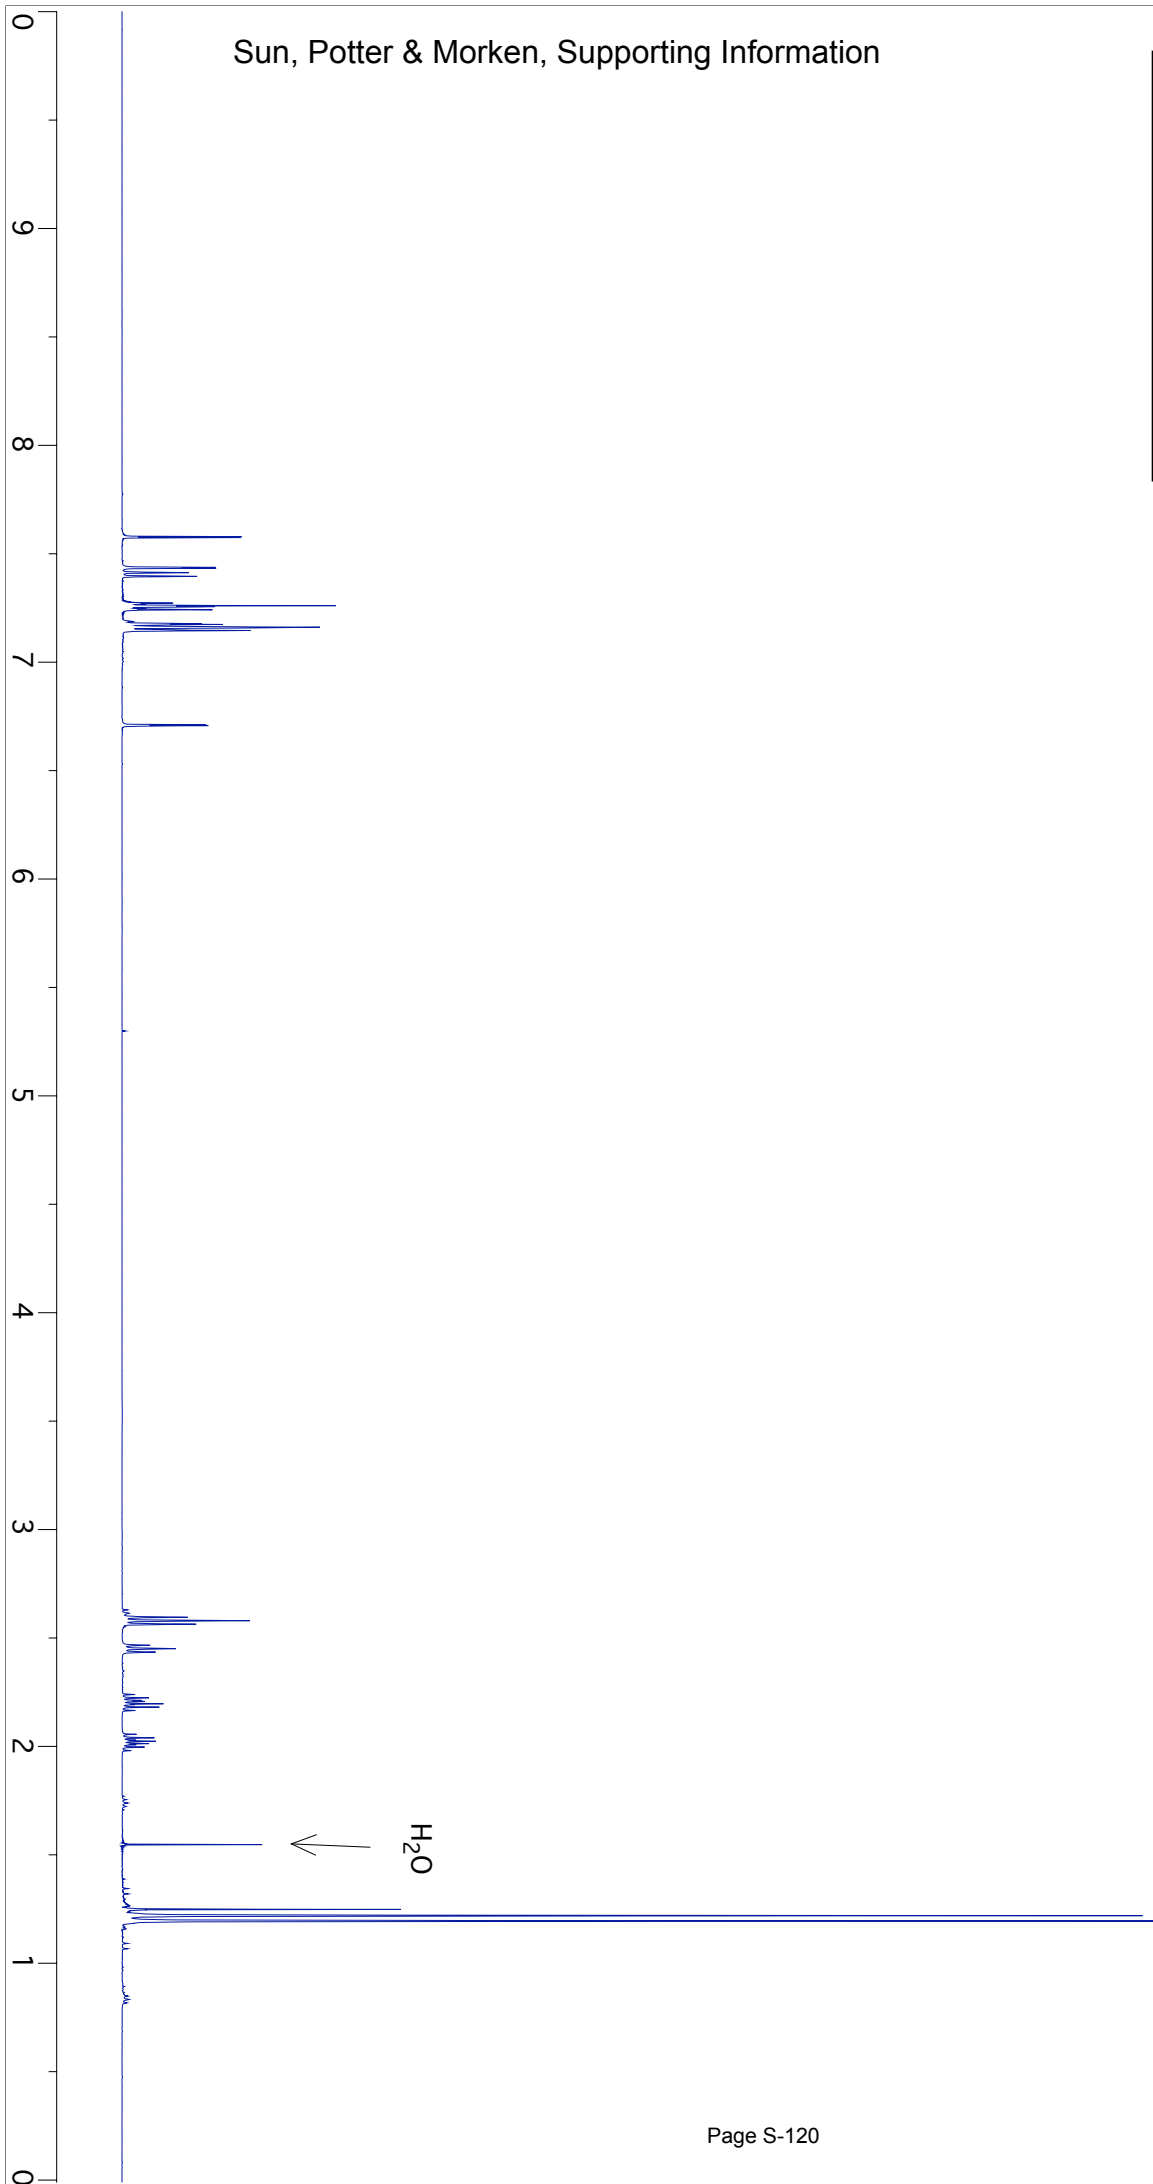



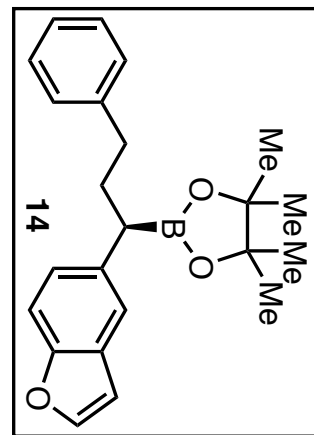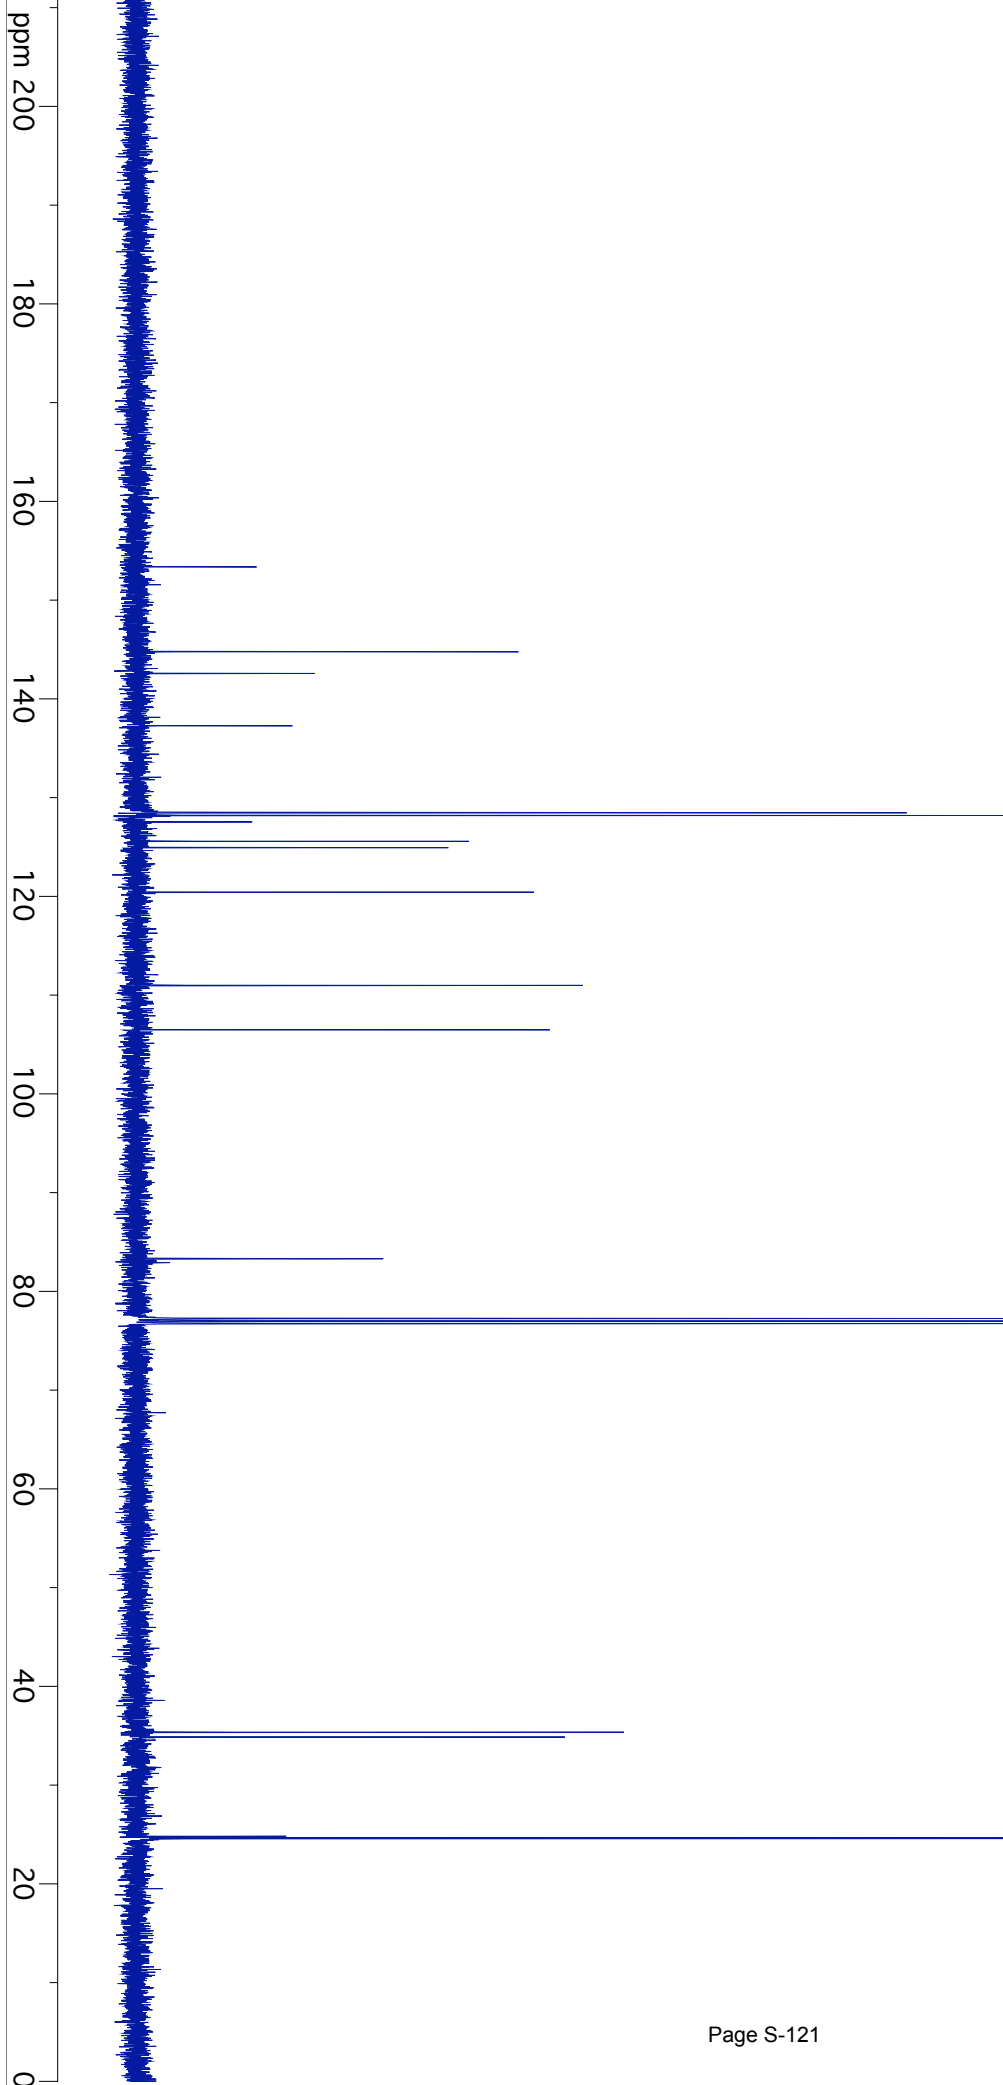

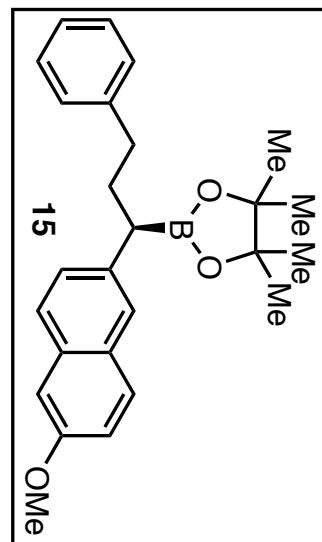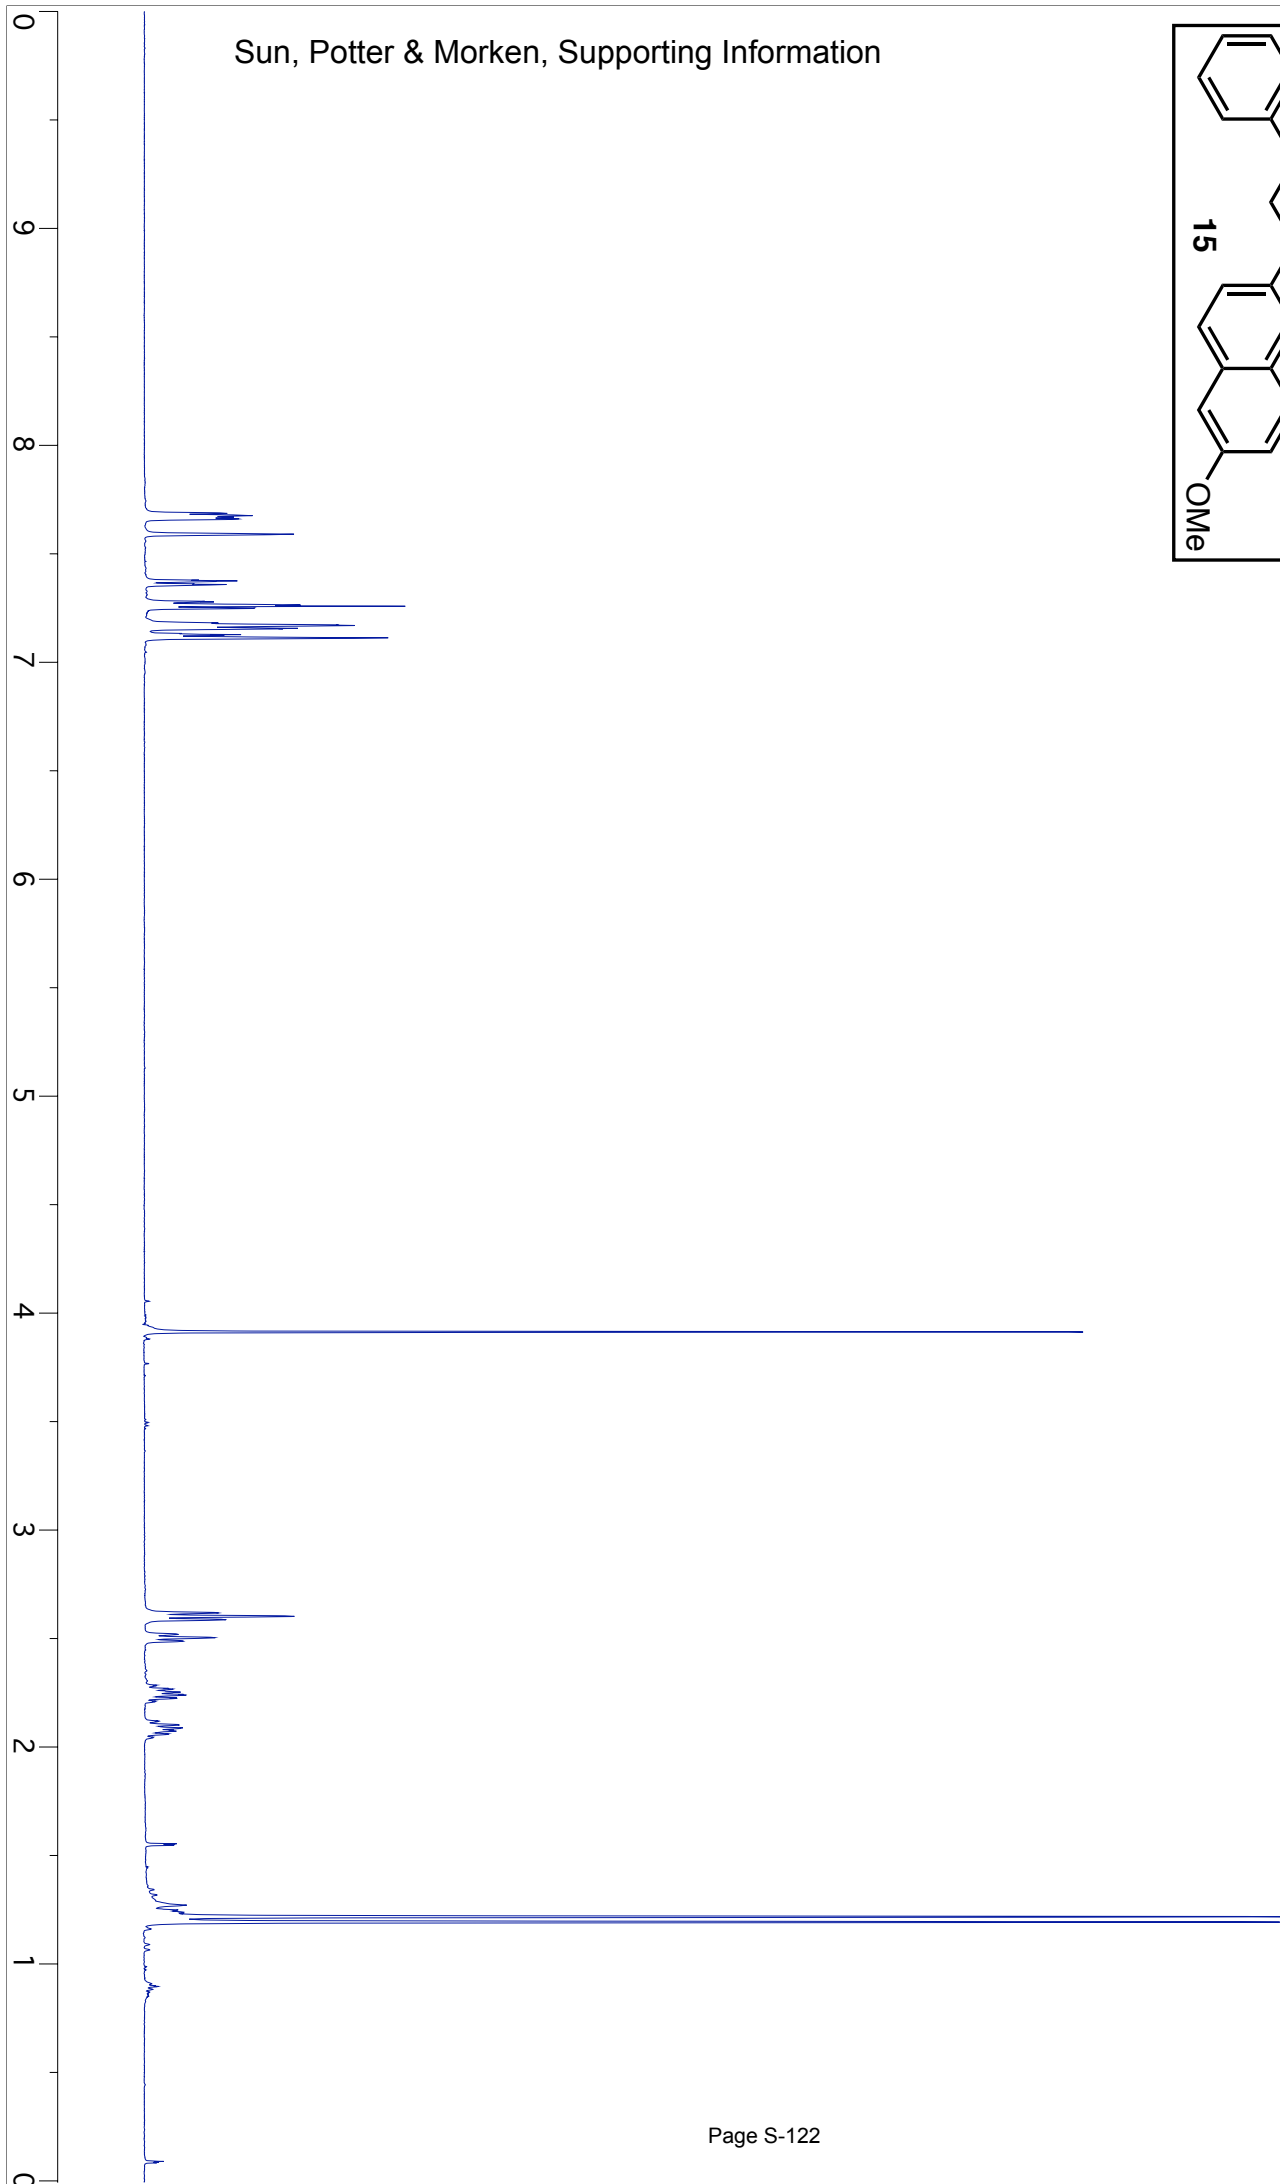

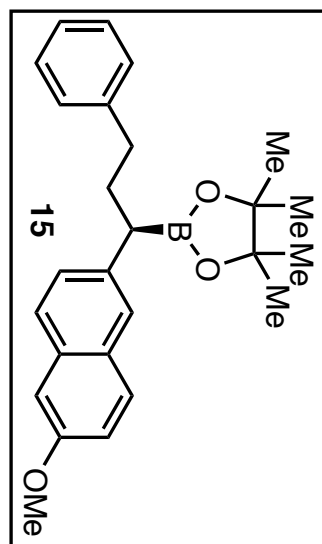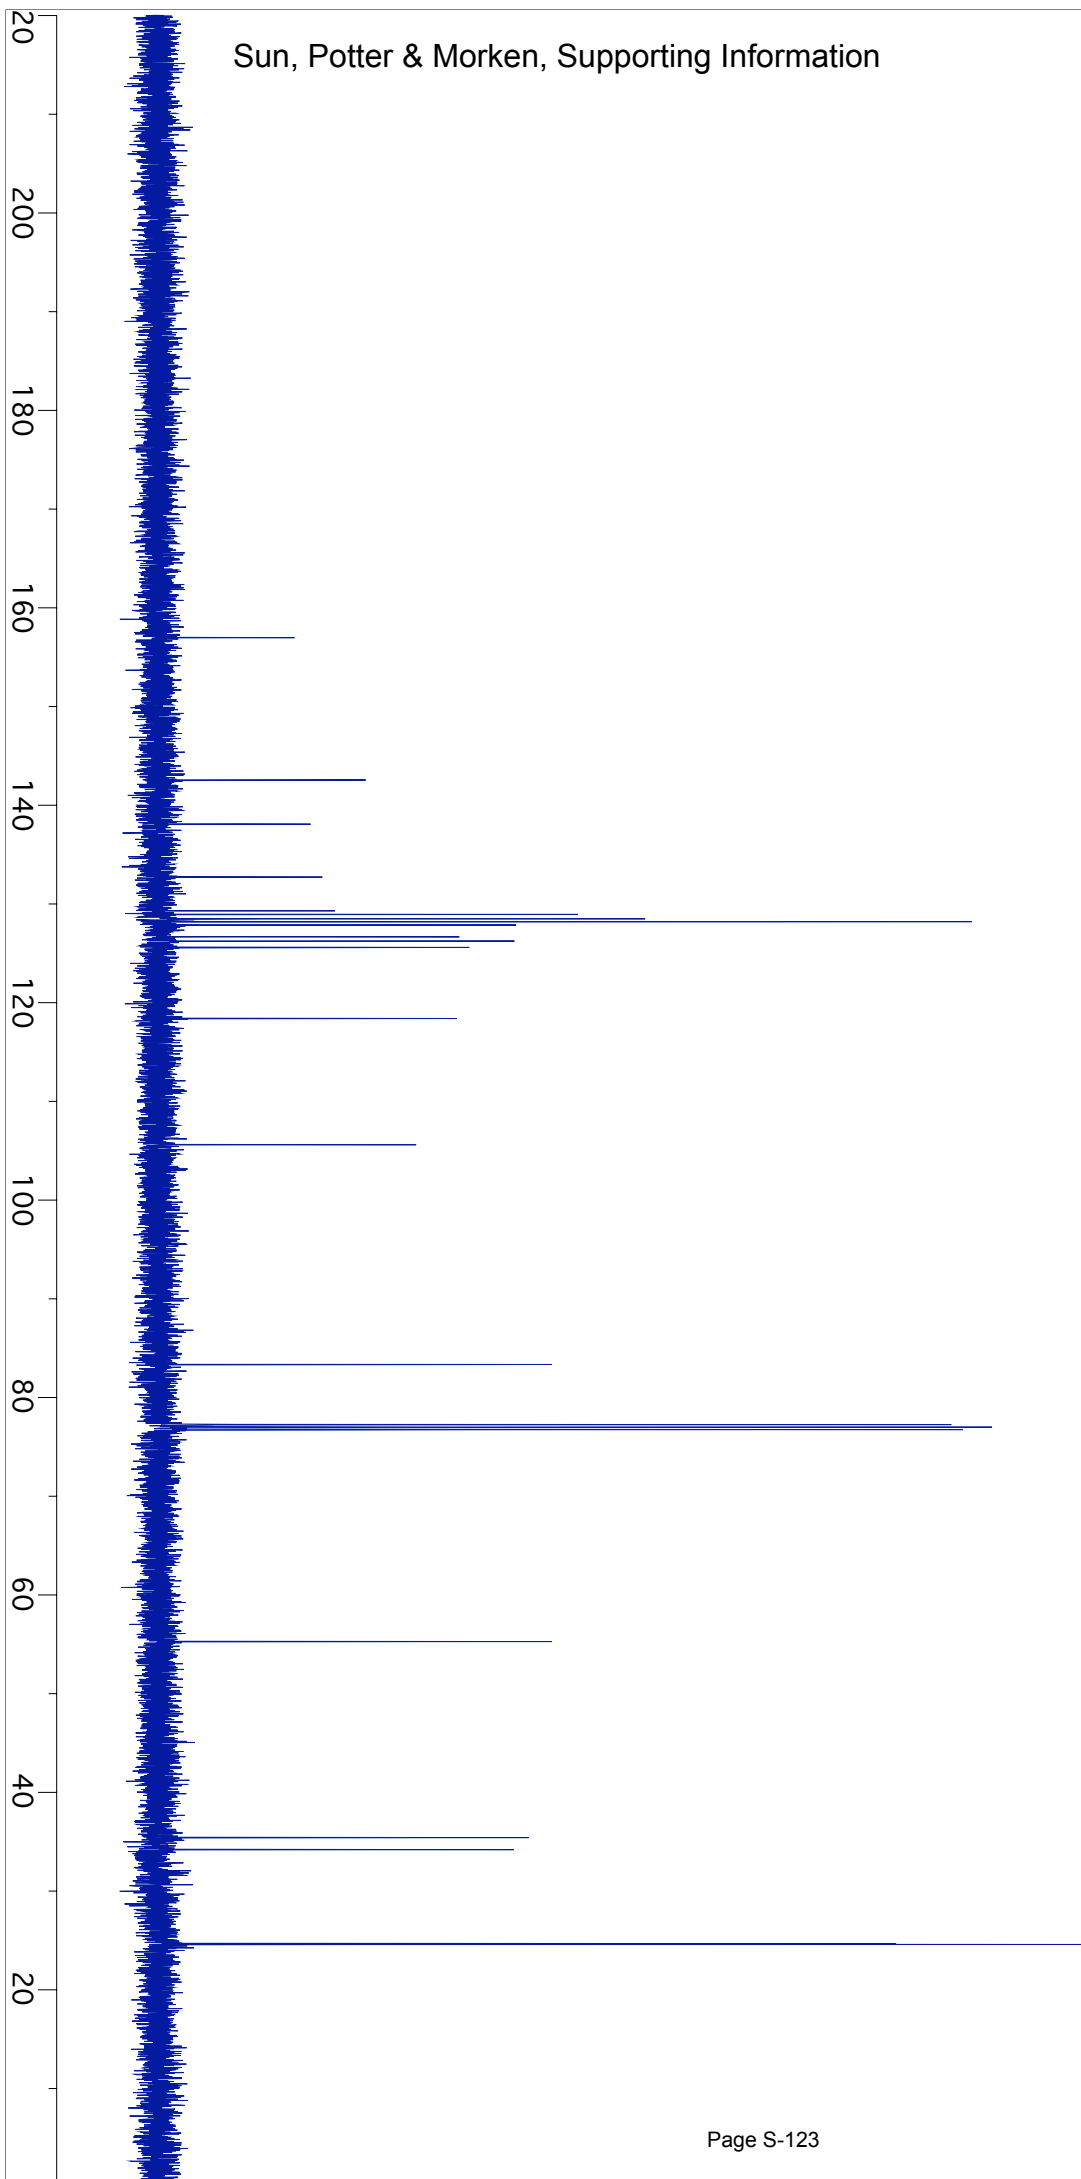

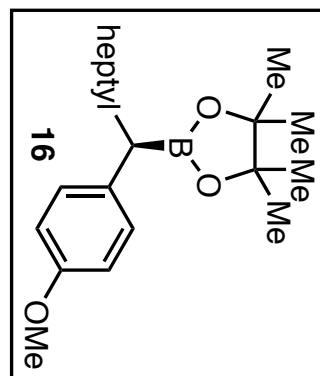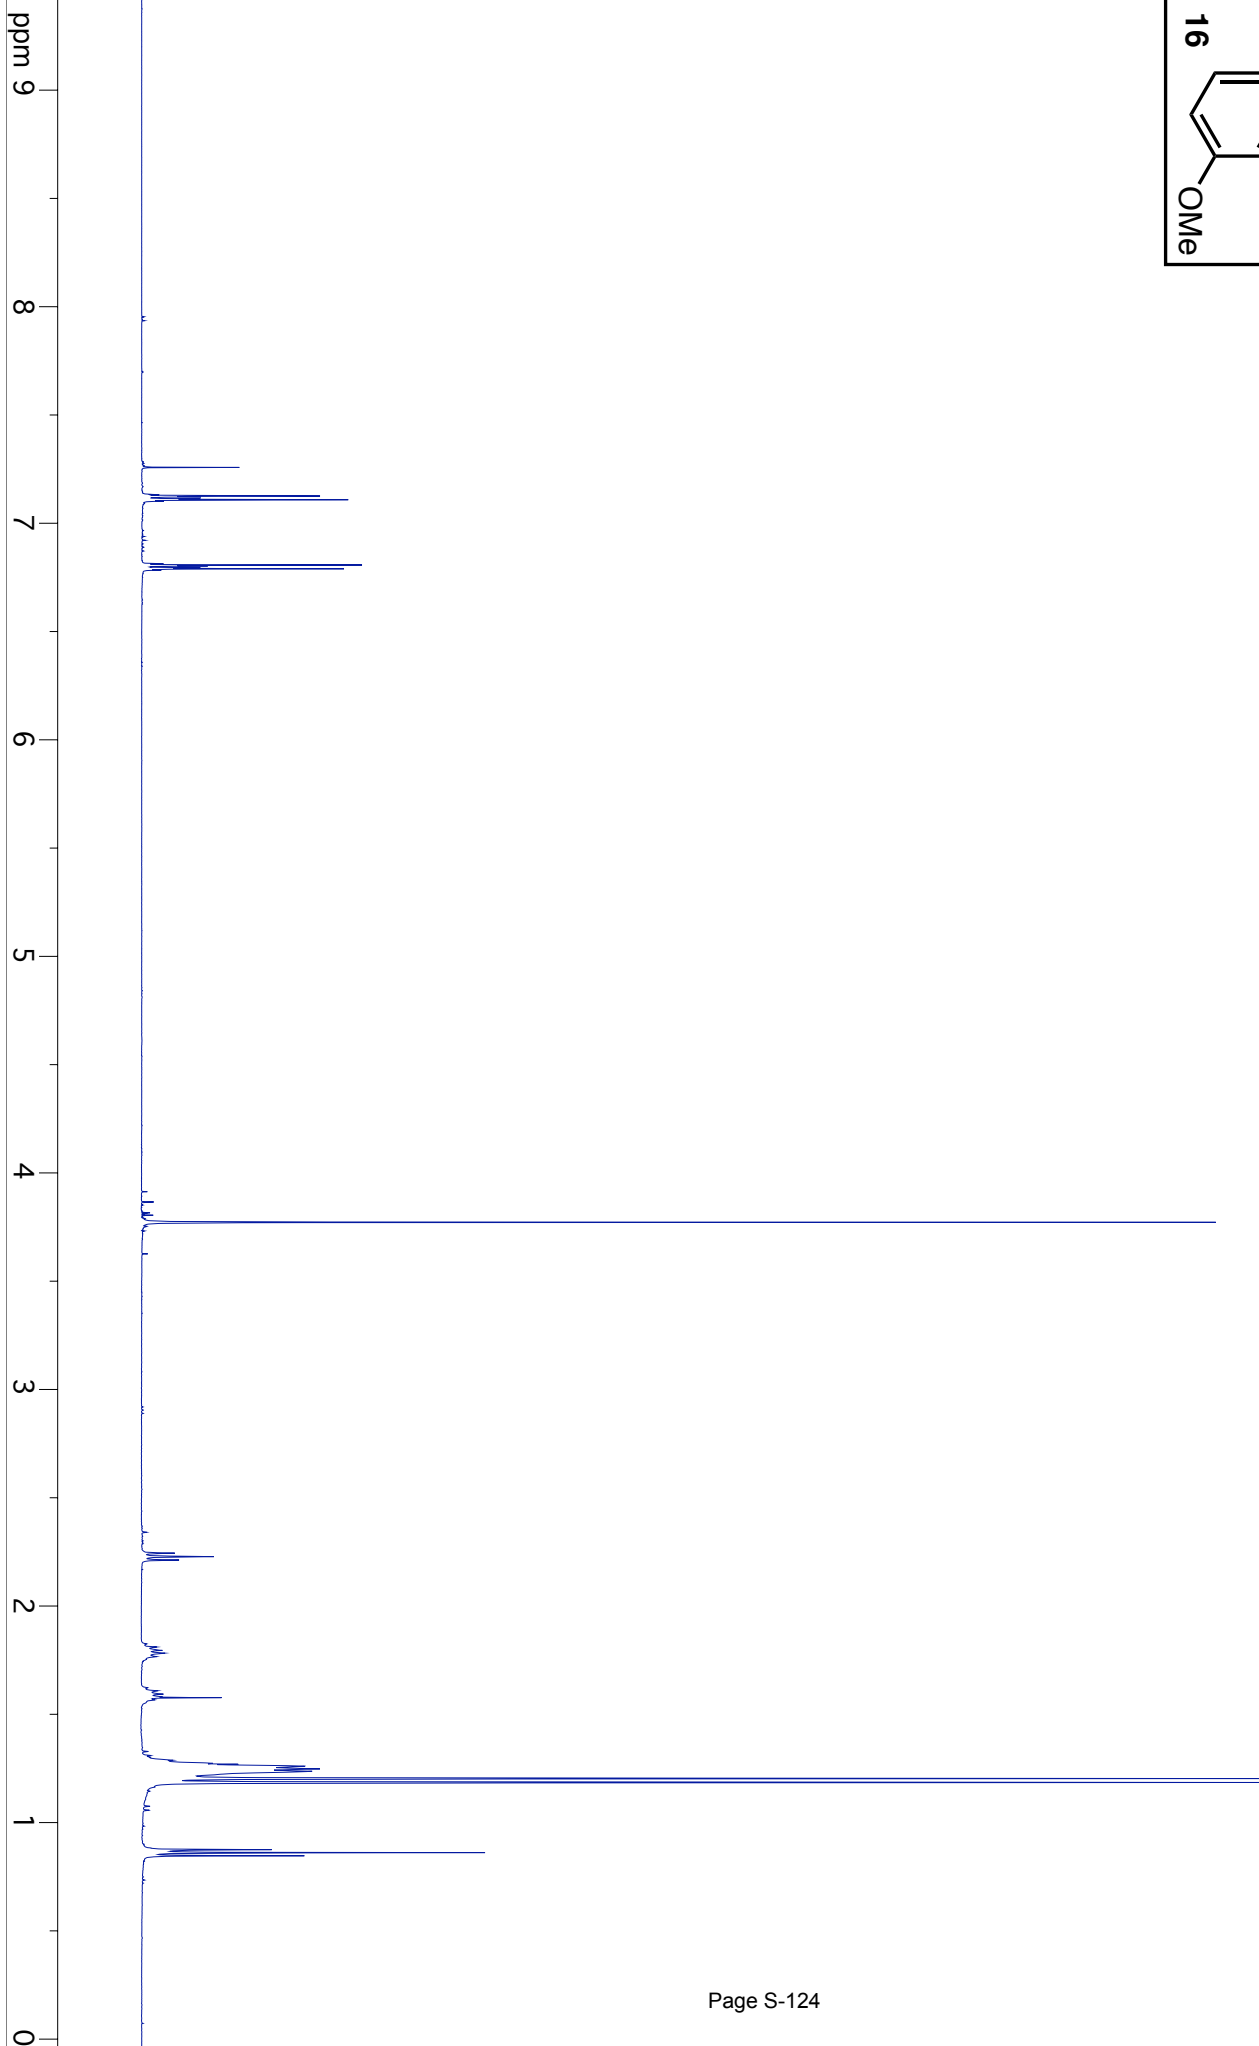

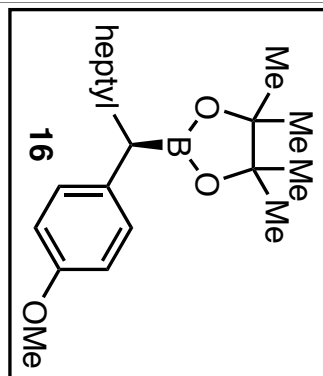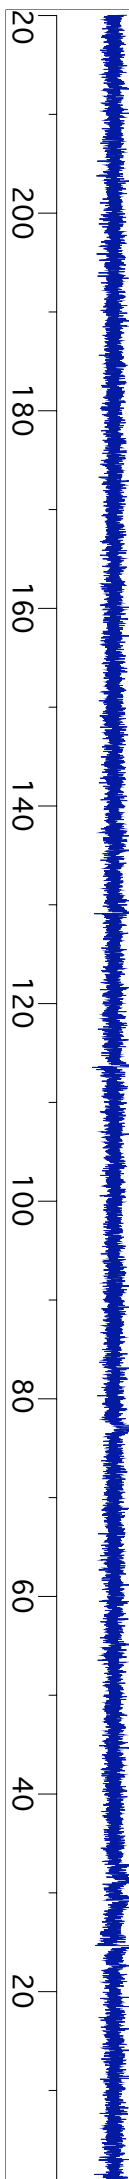

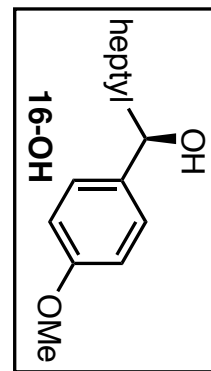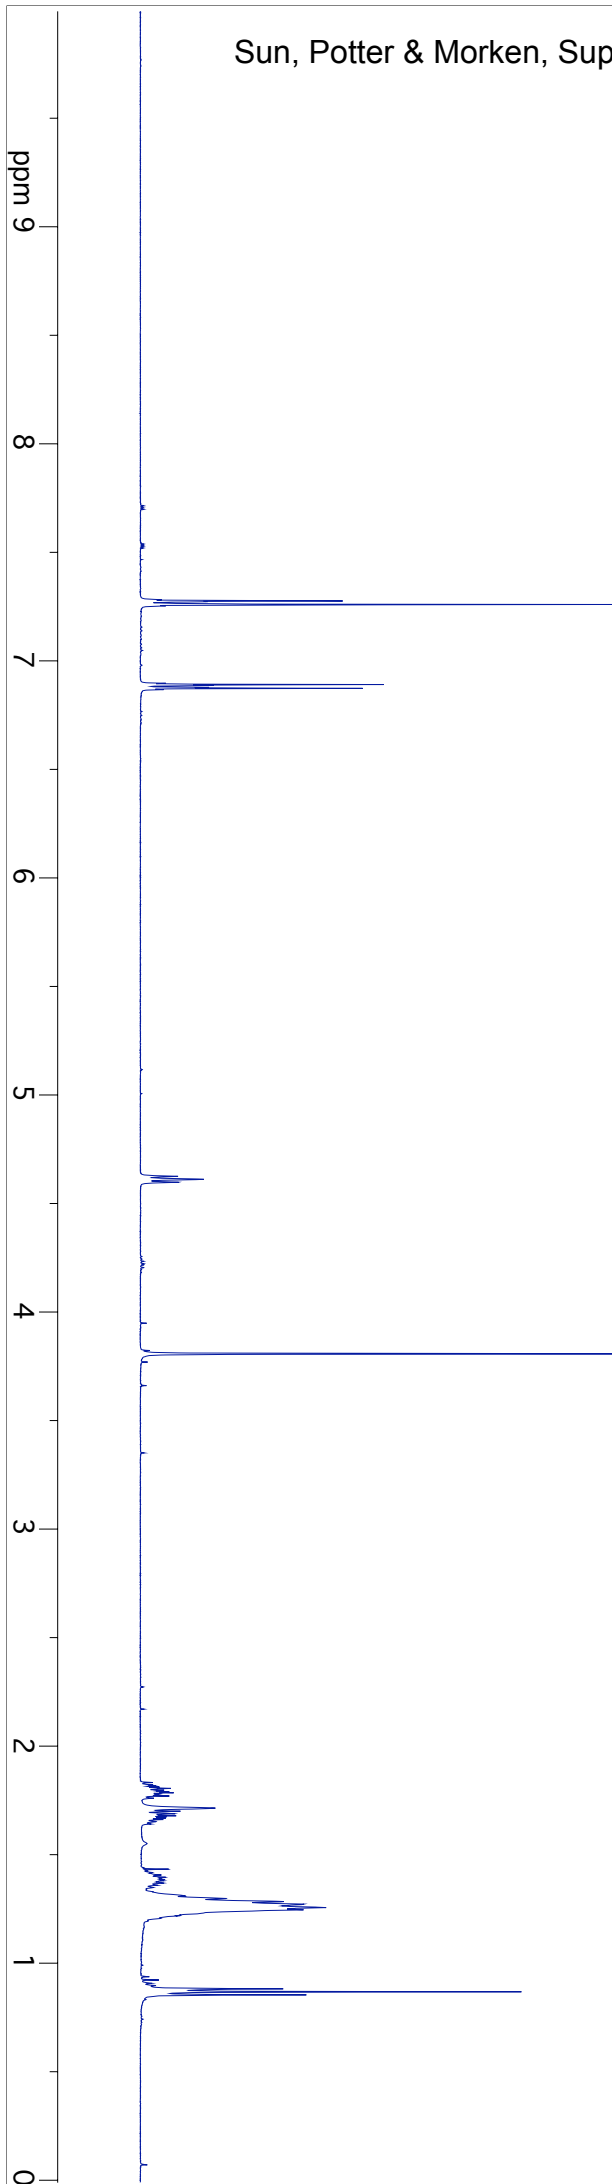

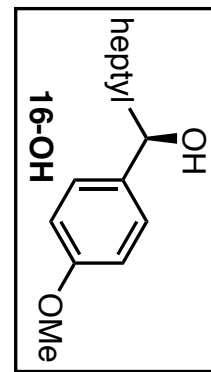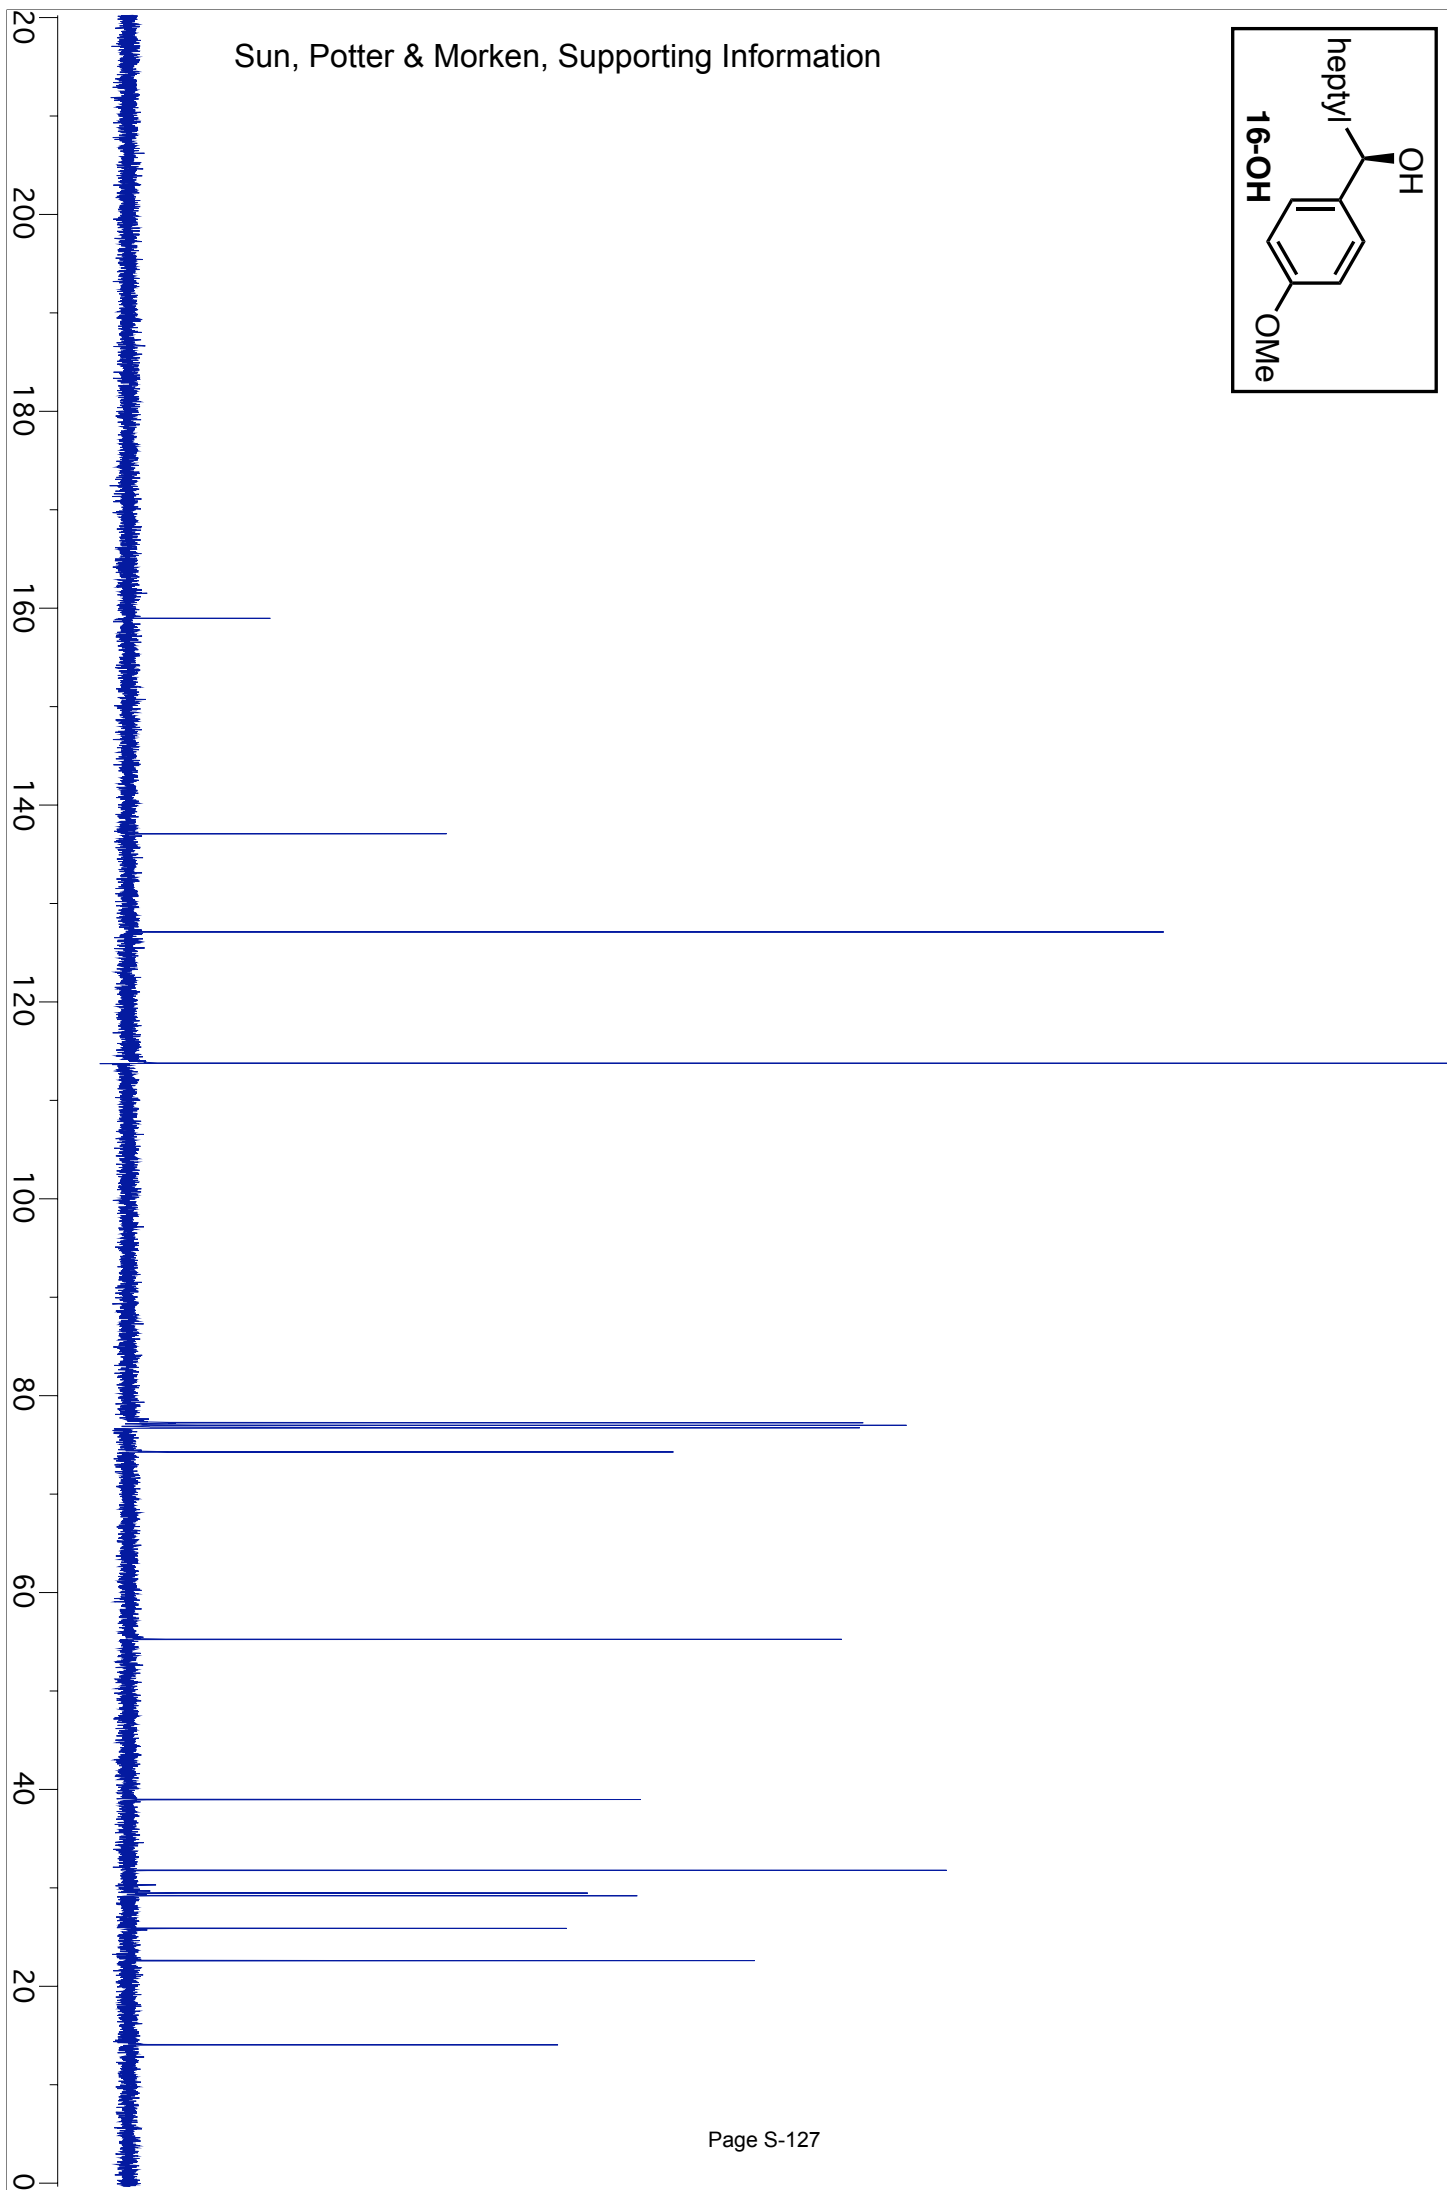

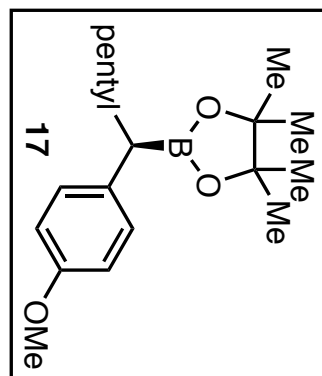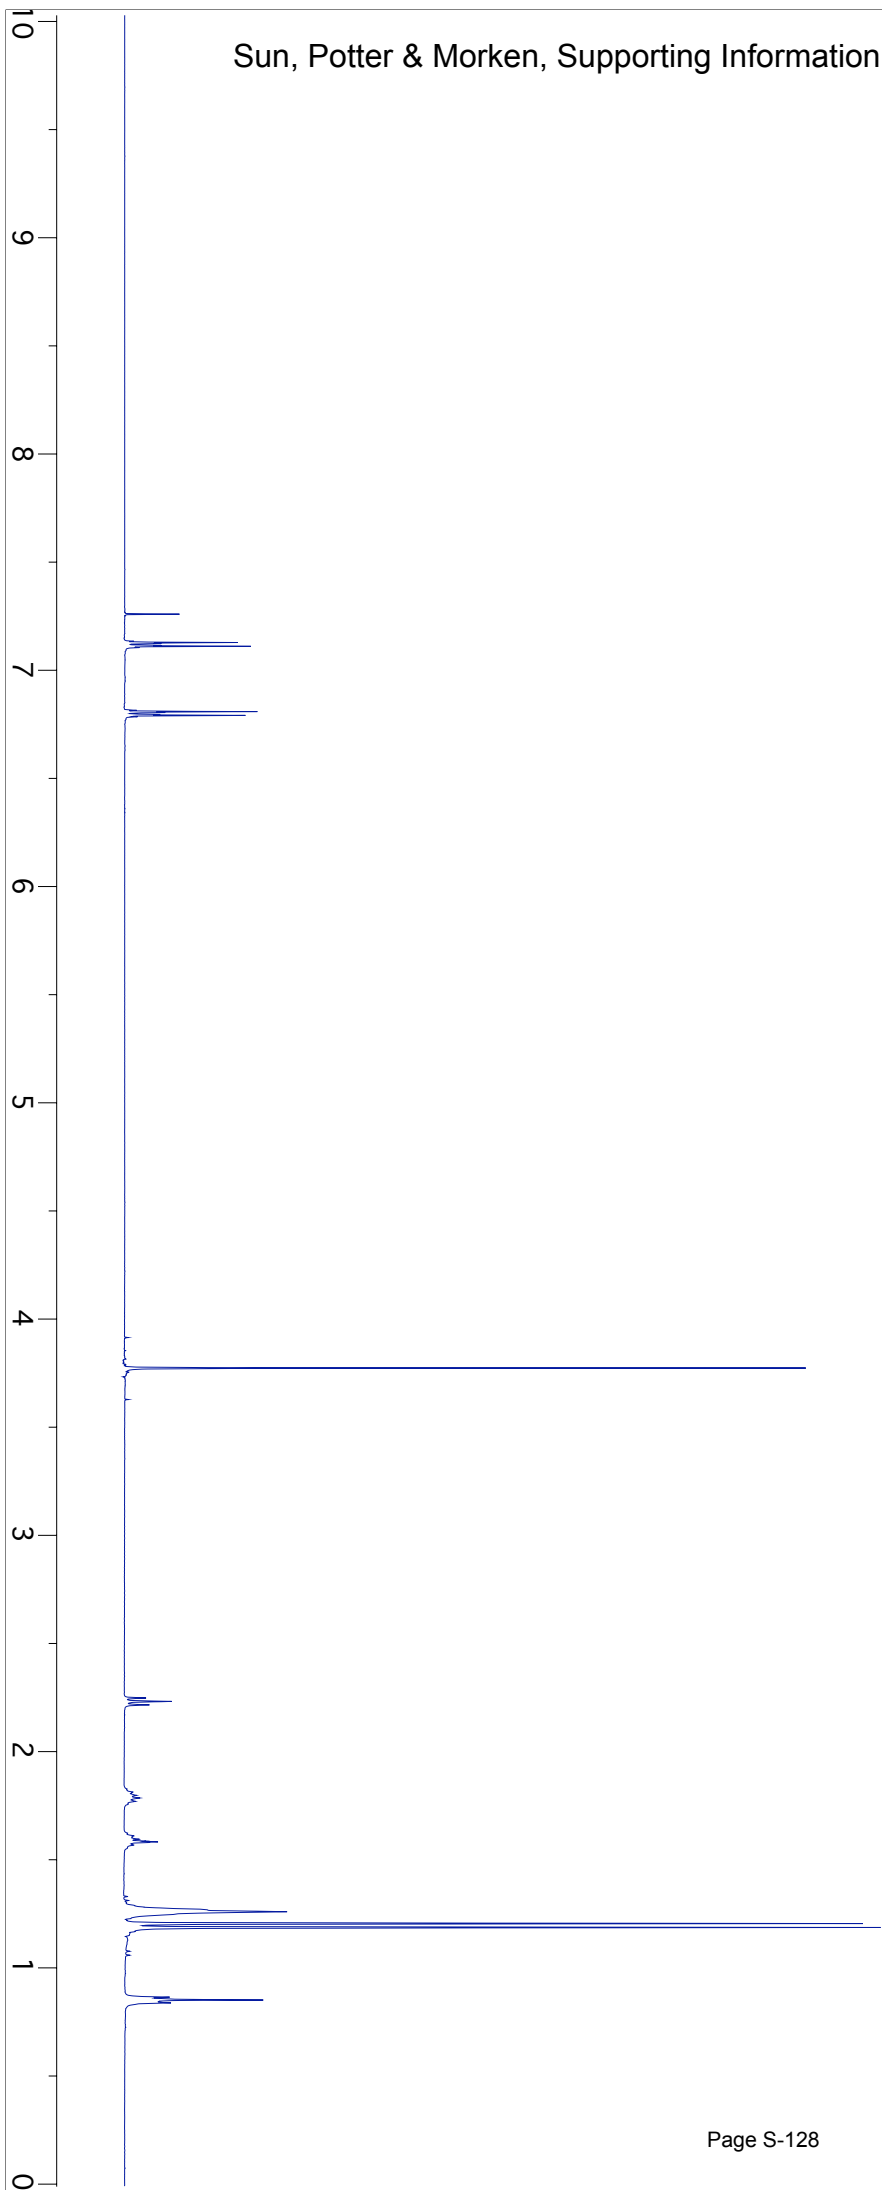



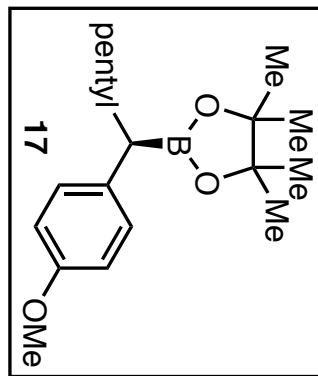

ppm 200  
180  
160  
140  
120  
100  
80  
60  
40  
20  
0

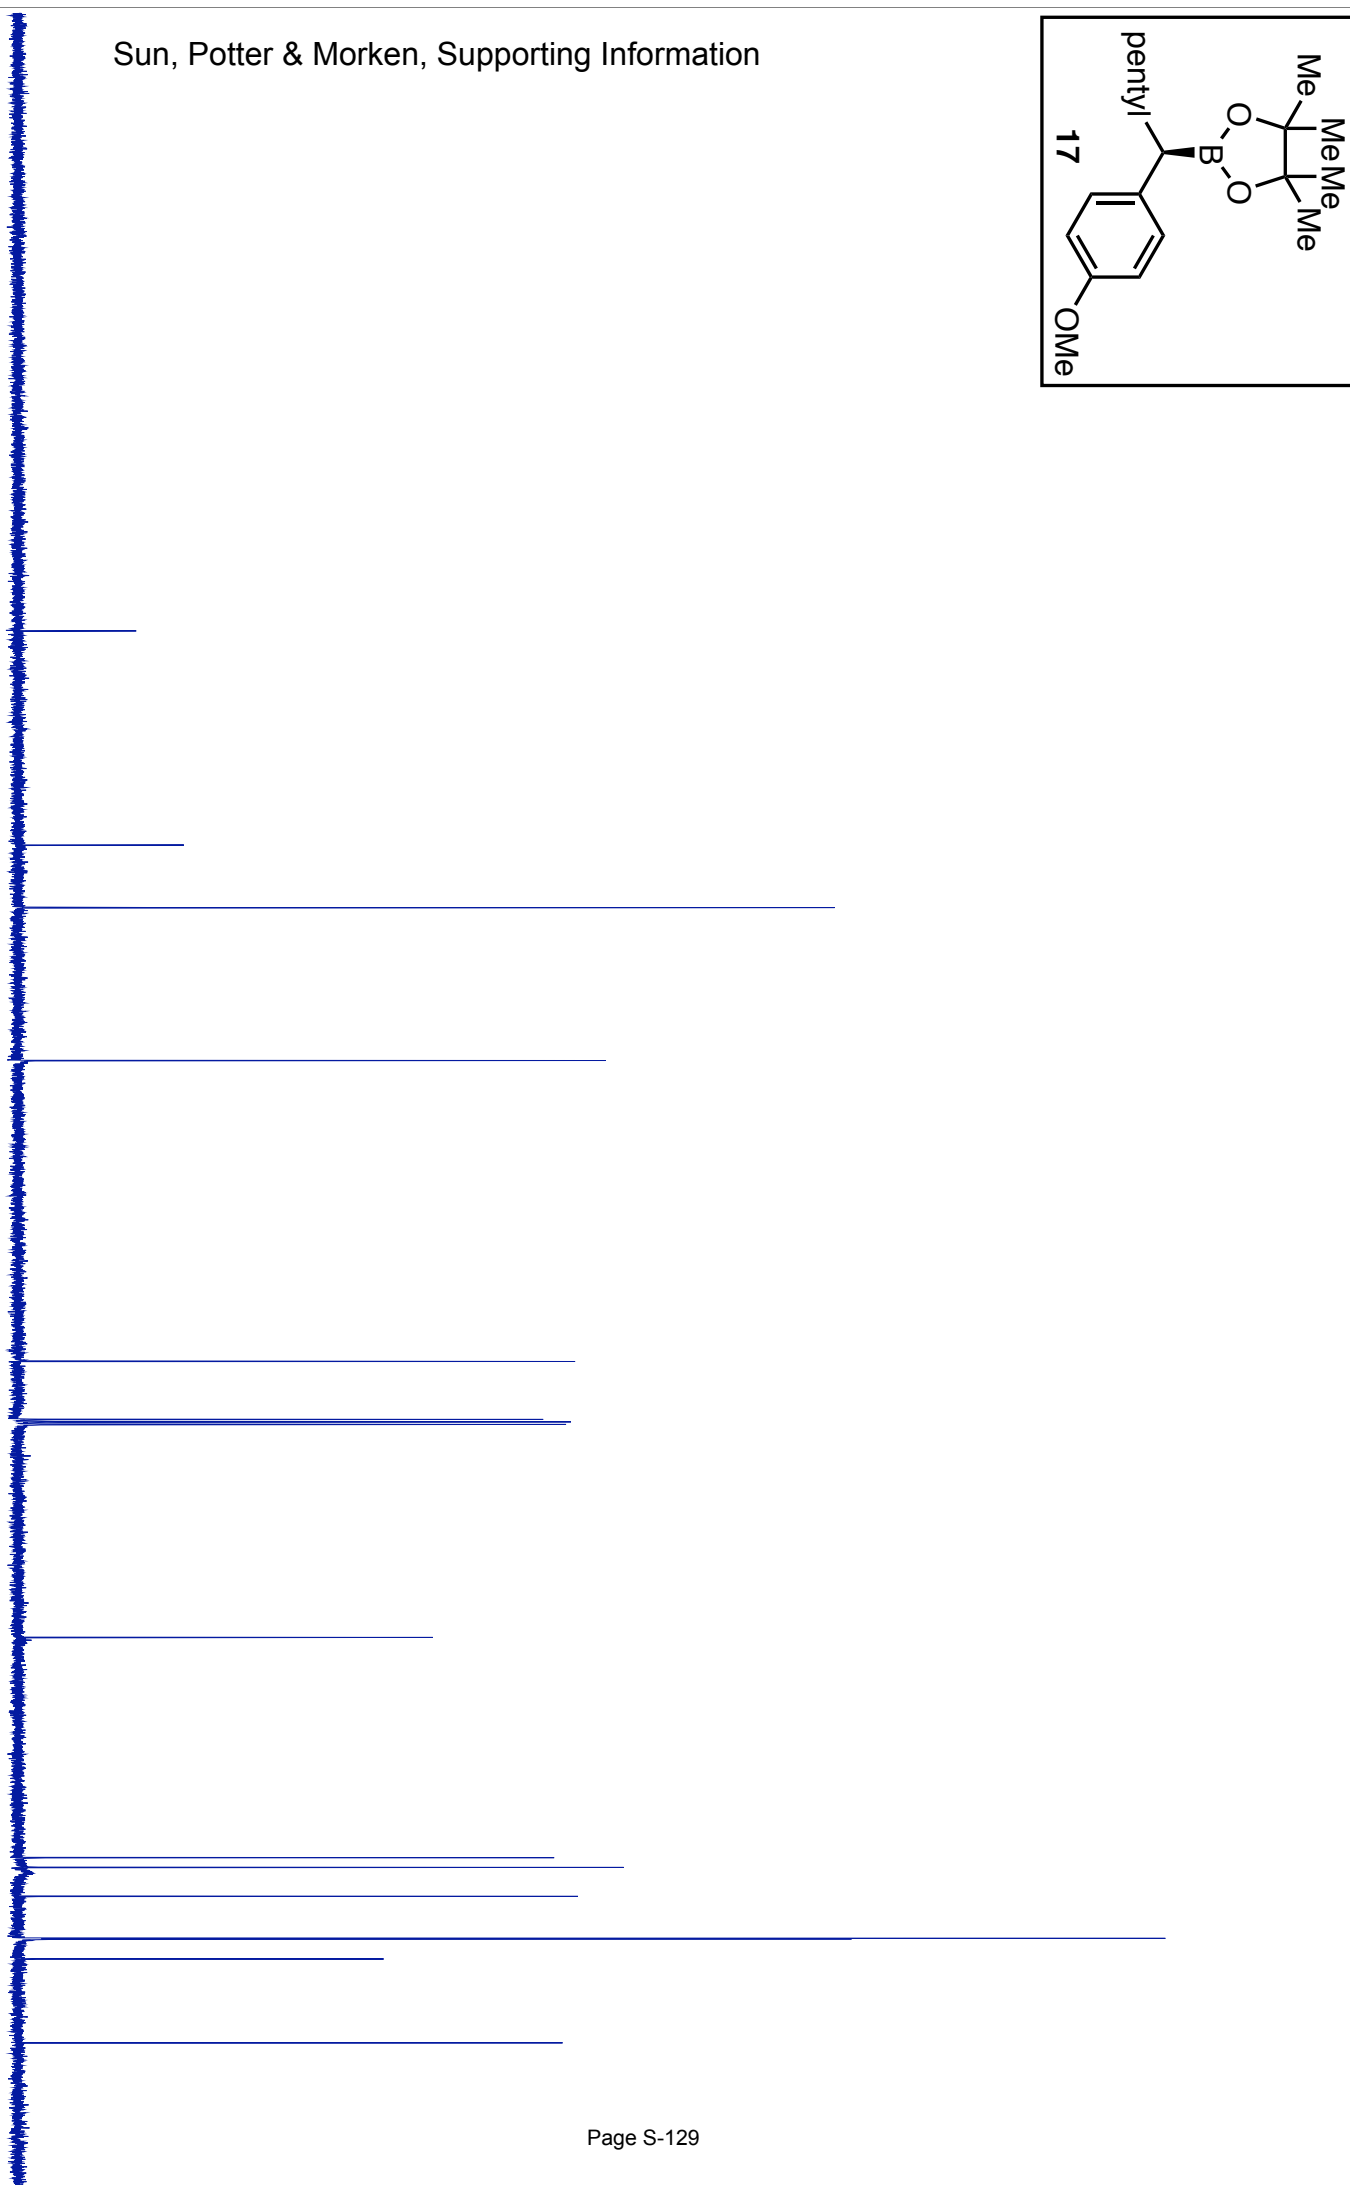

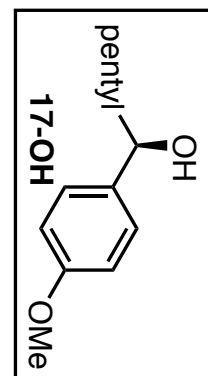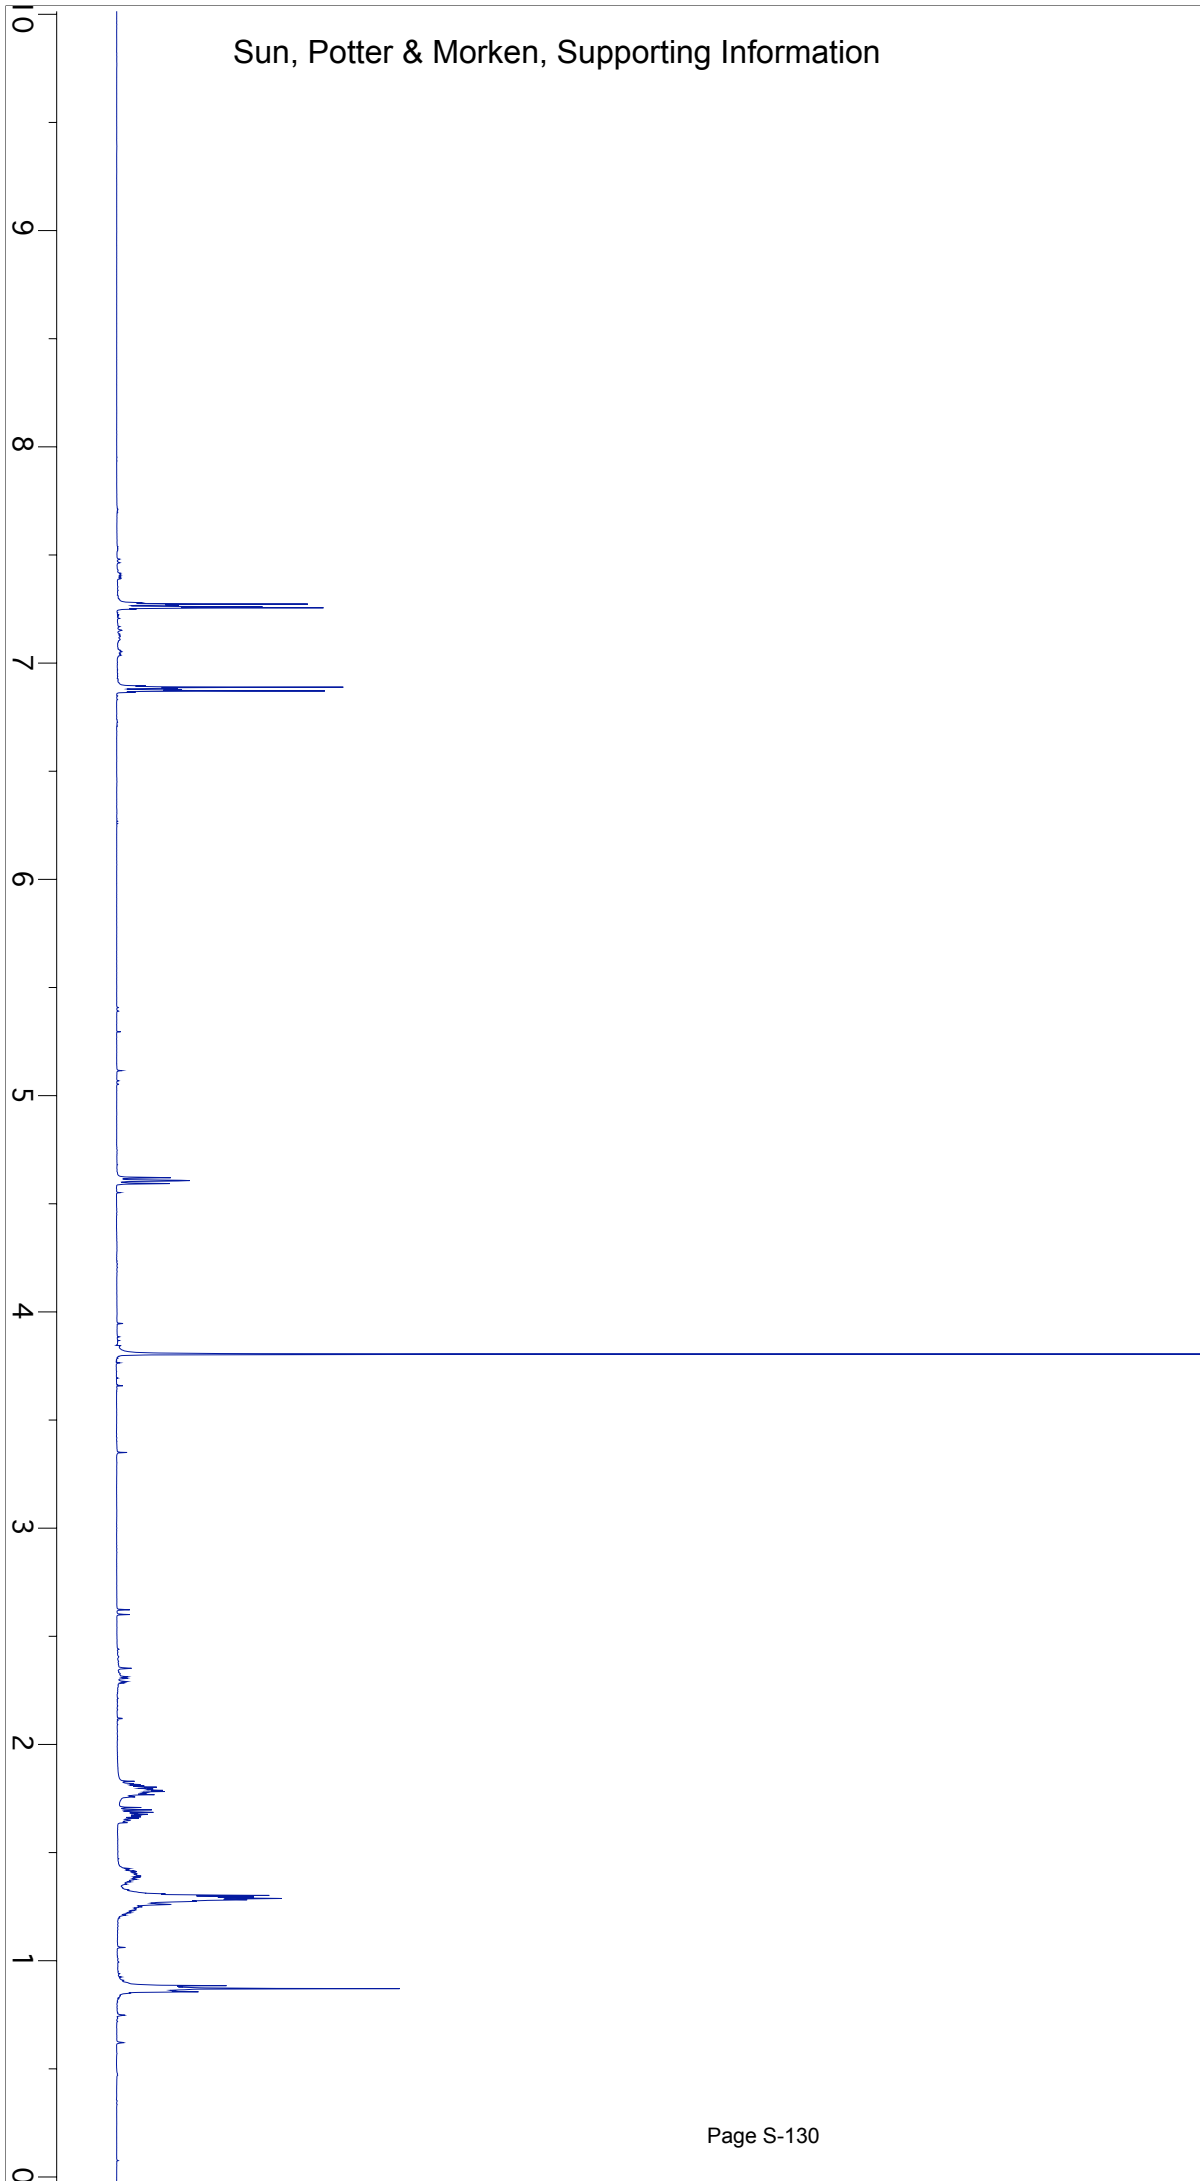

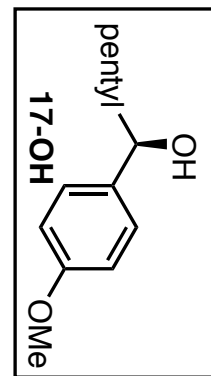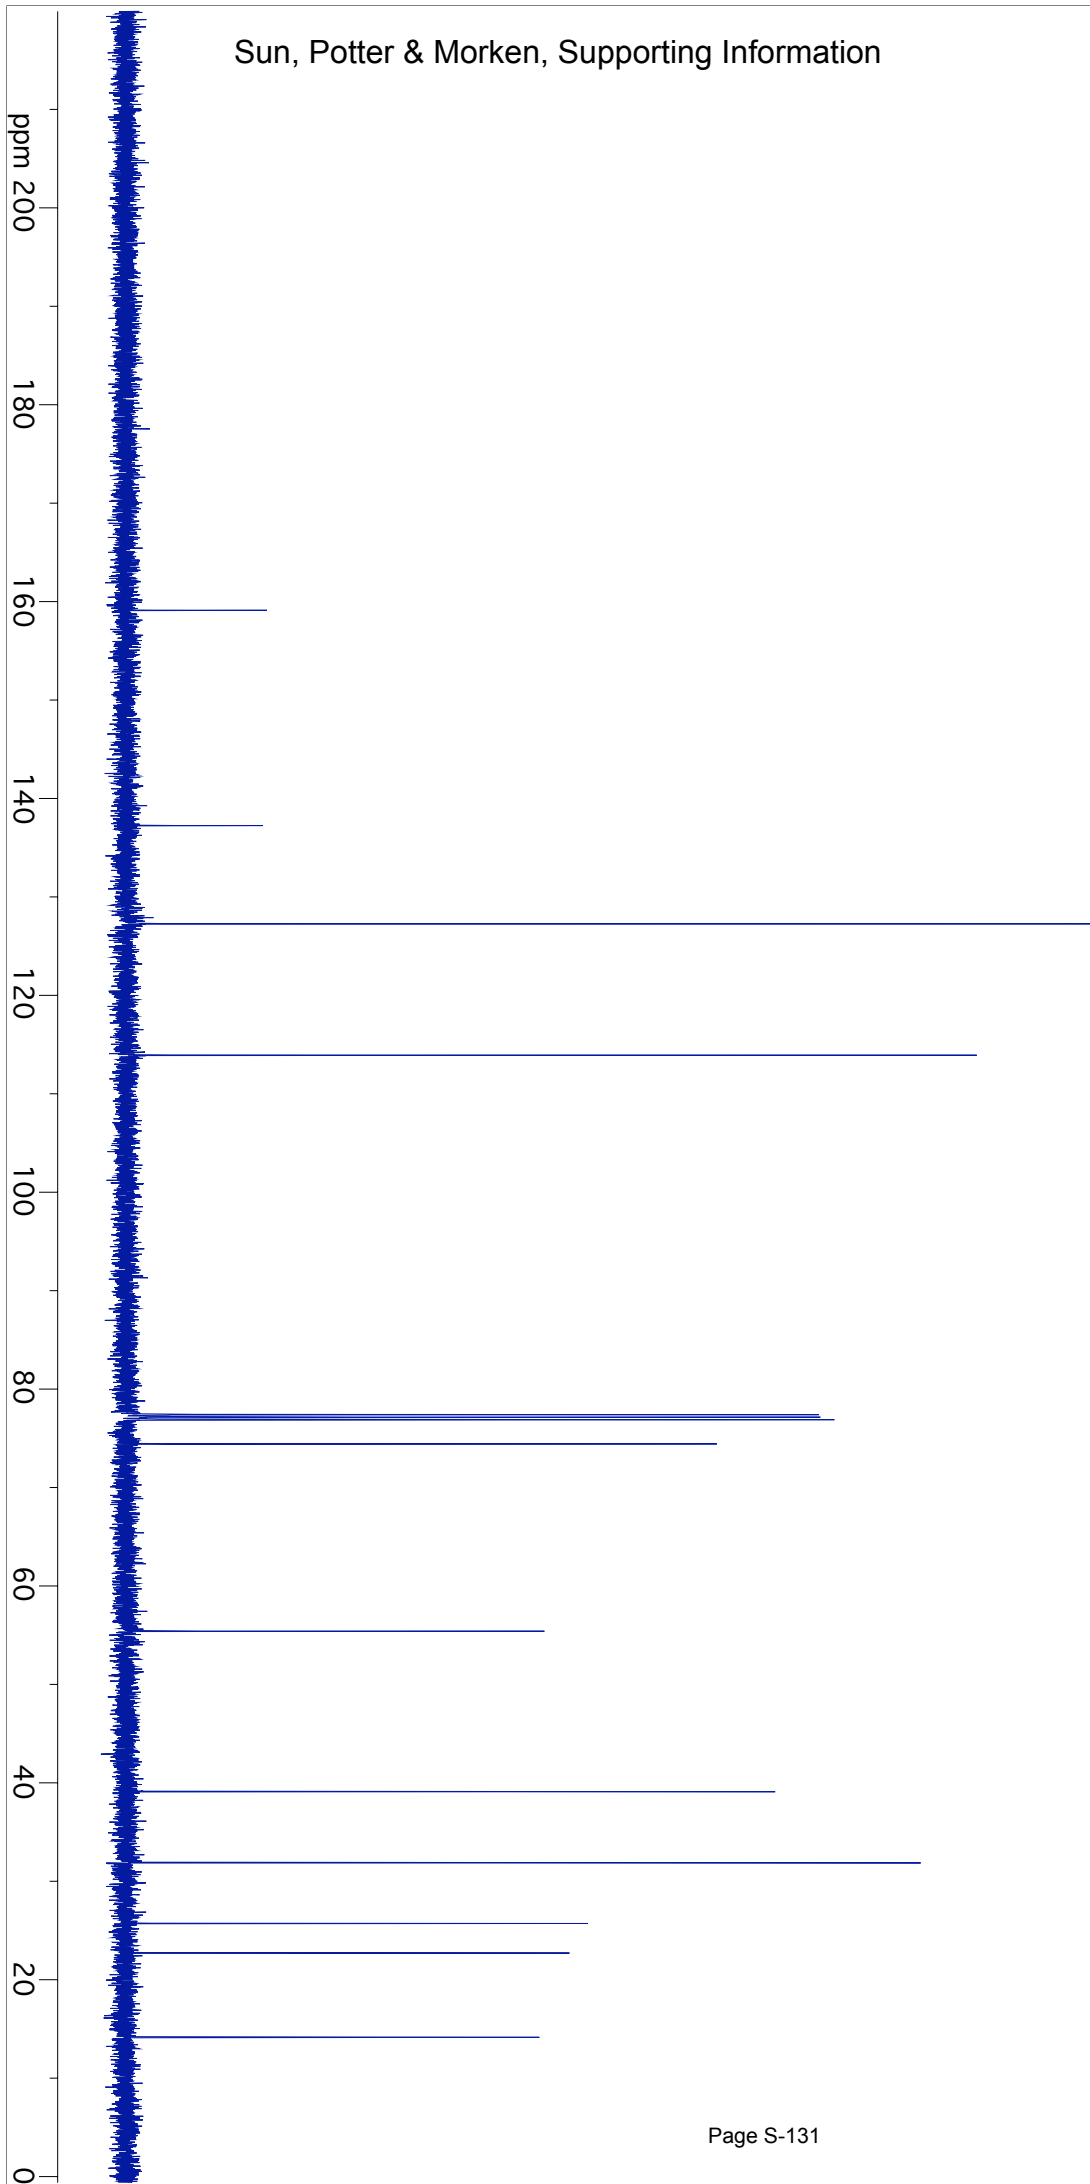

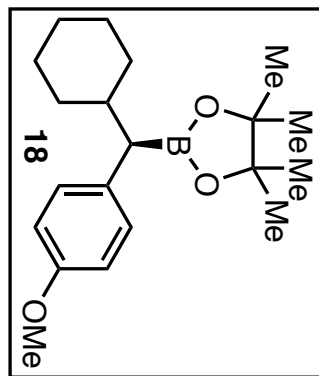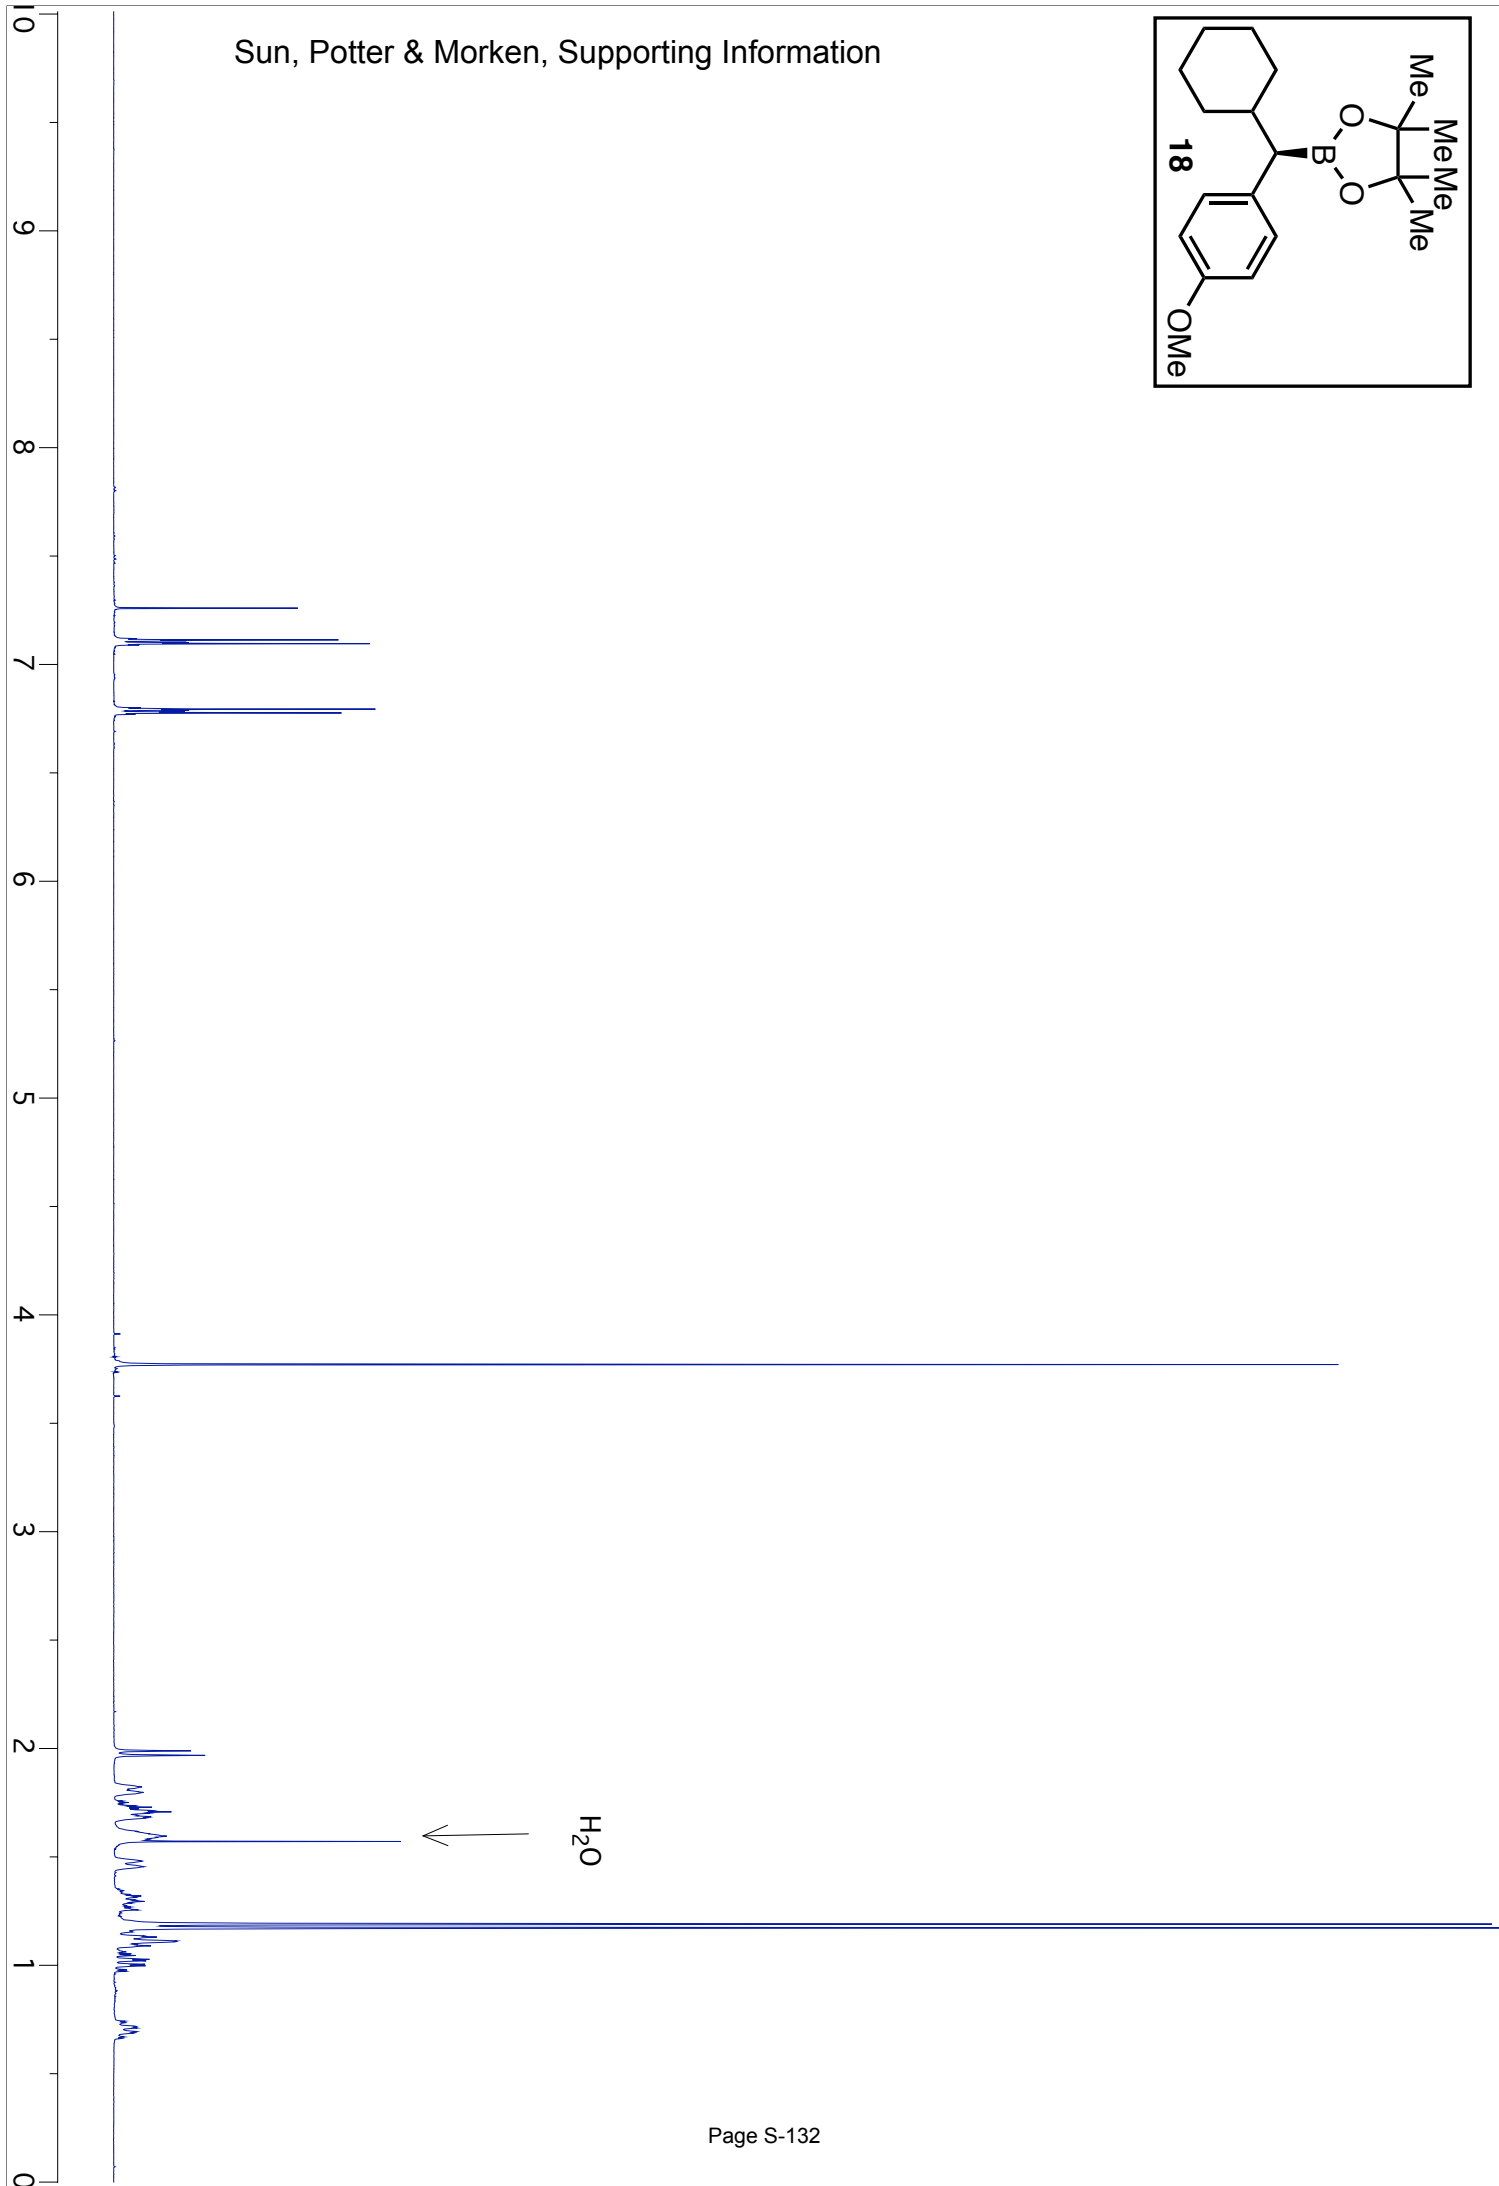

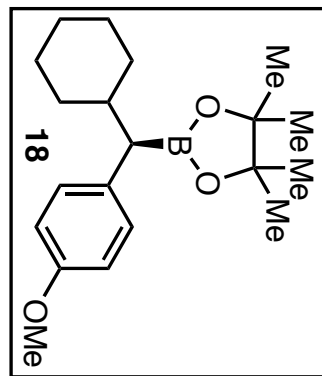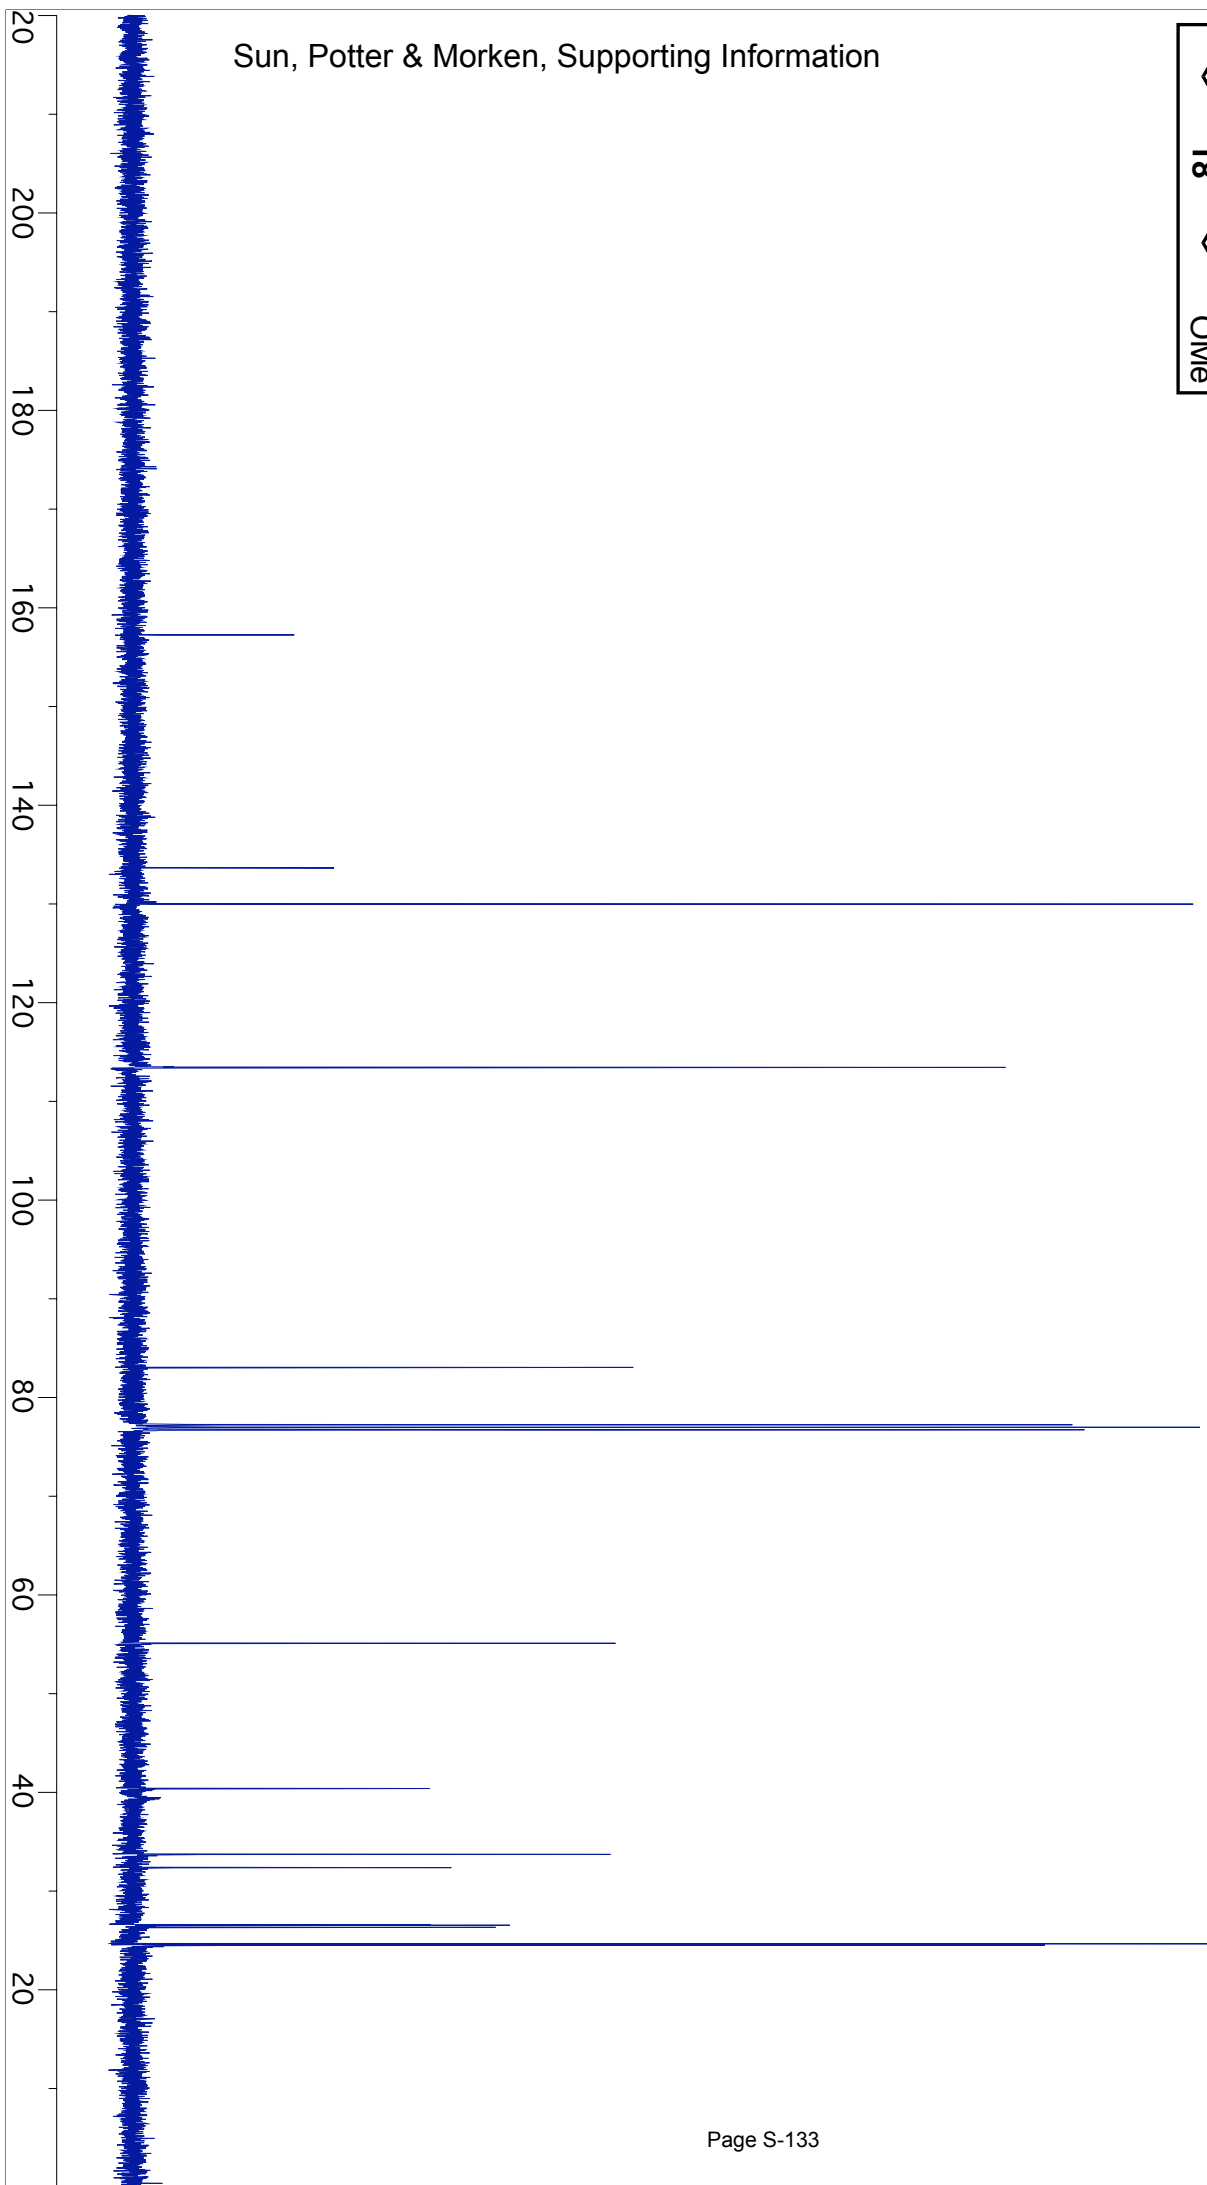

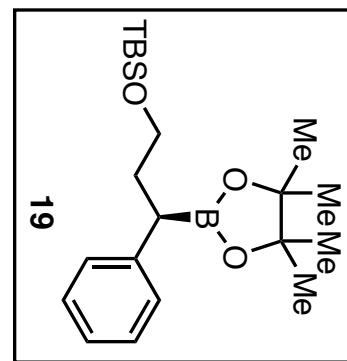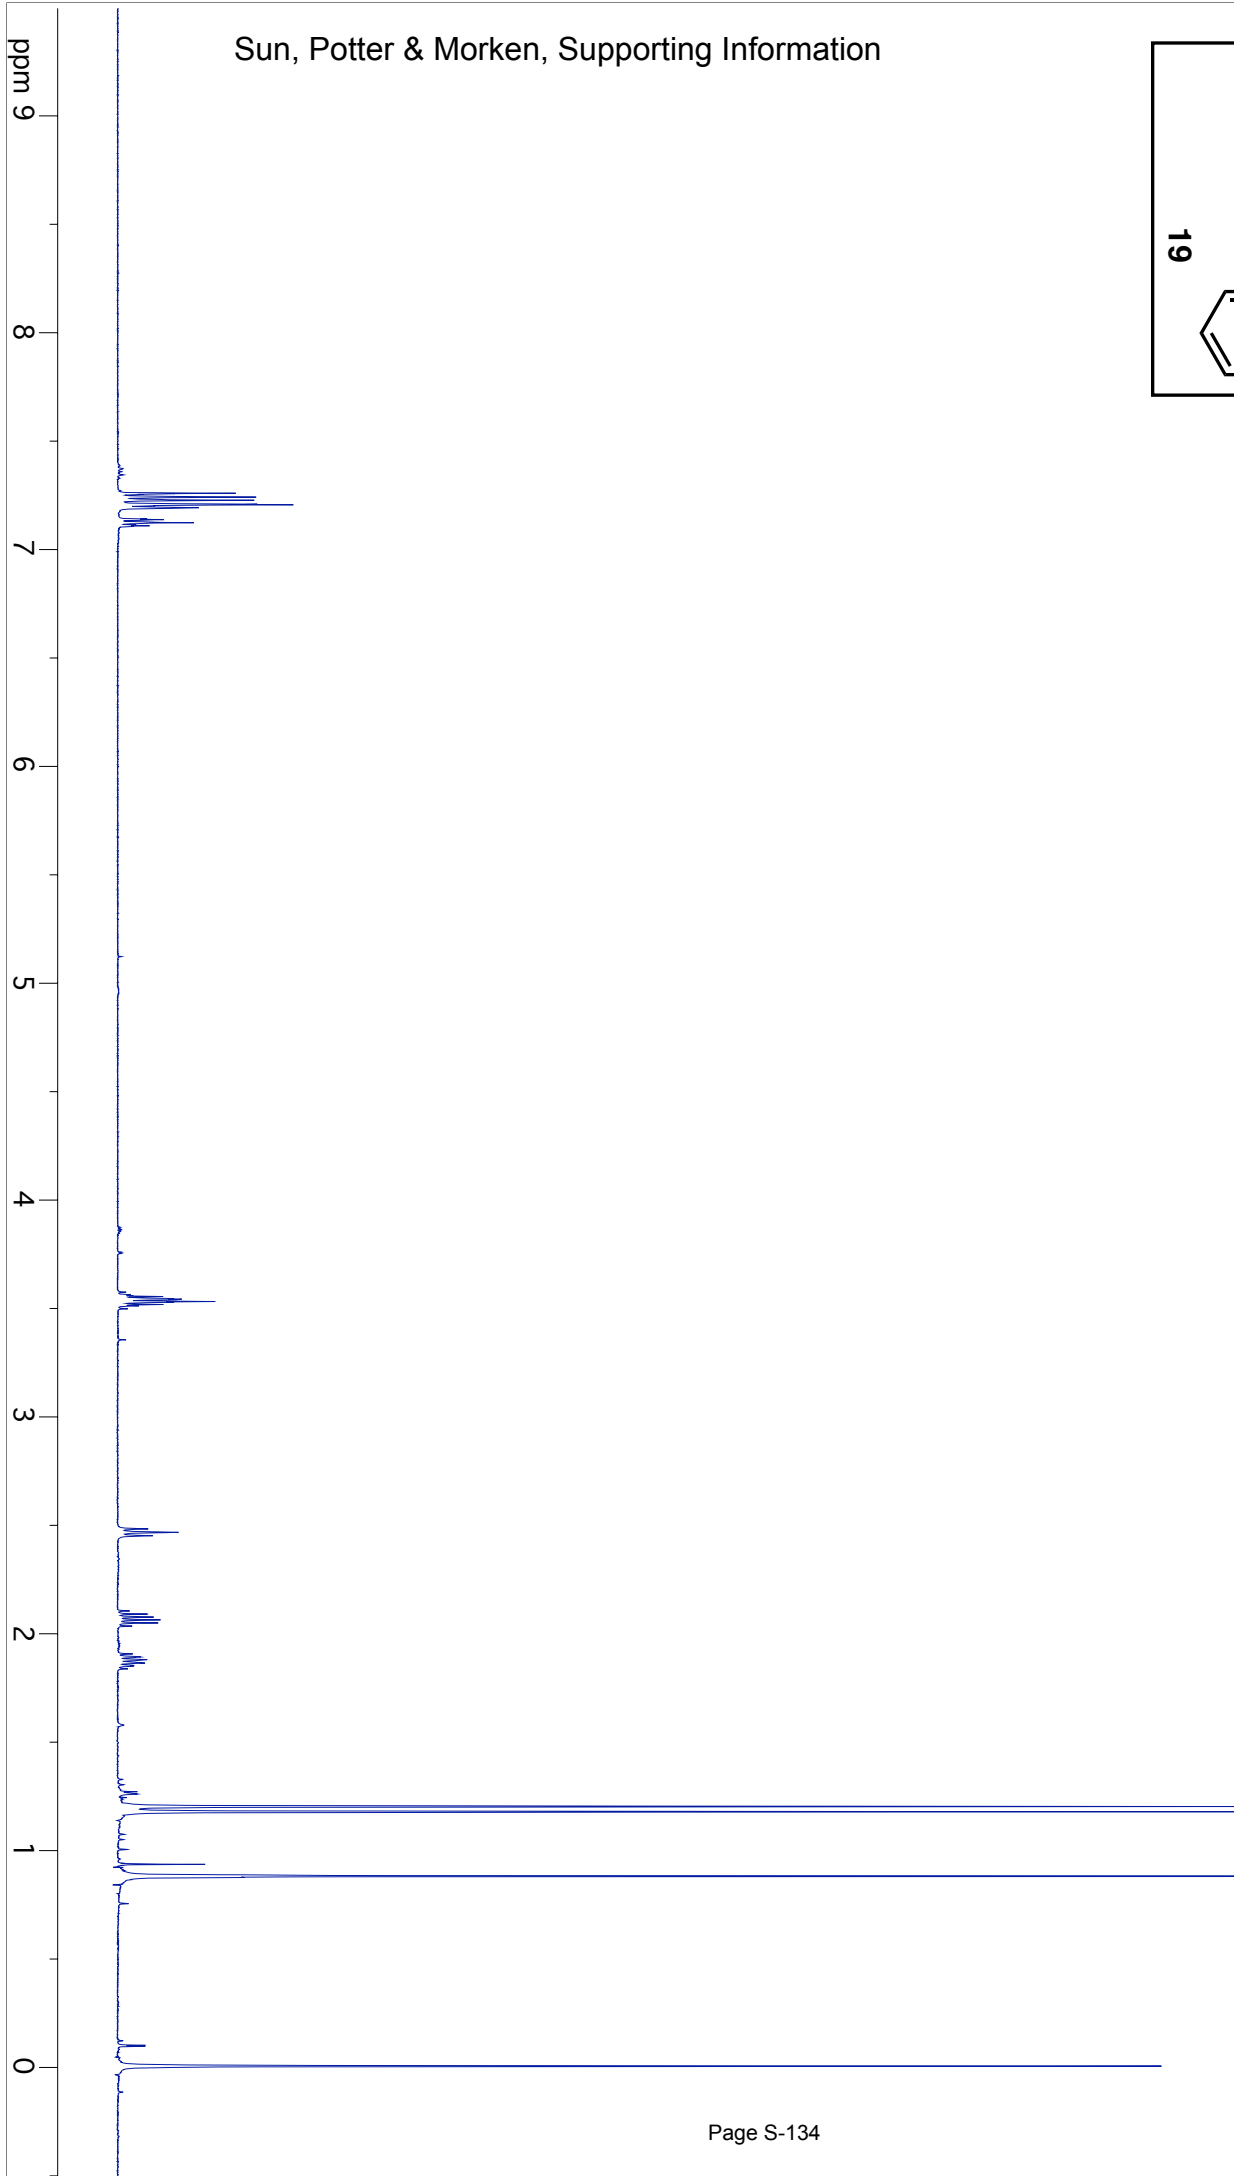

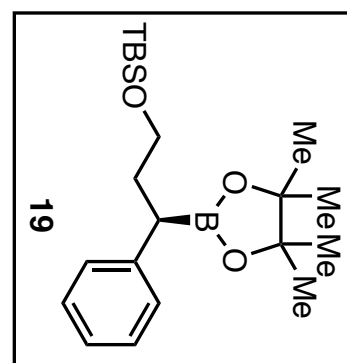

ppm 200  
180  
160  
140  
120  
100  
80  
60  
40  
20  
0

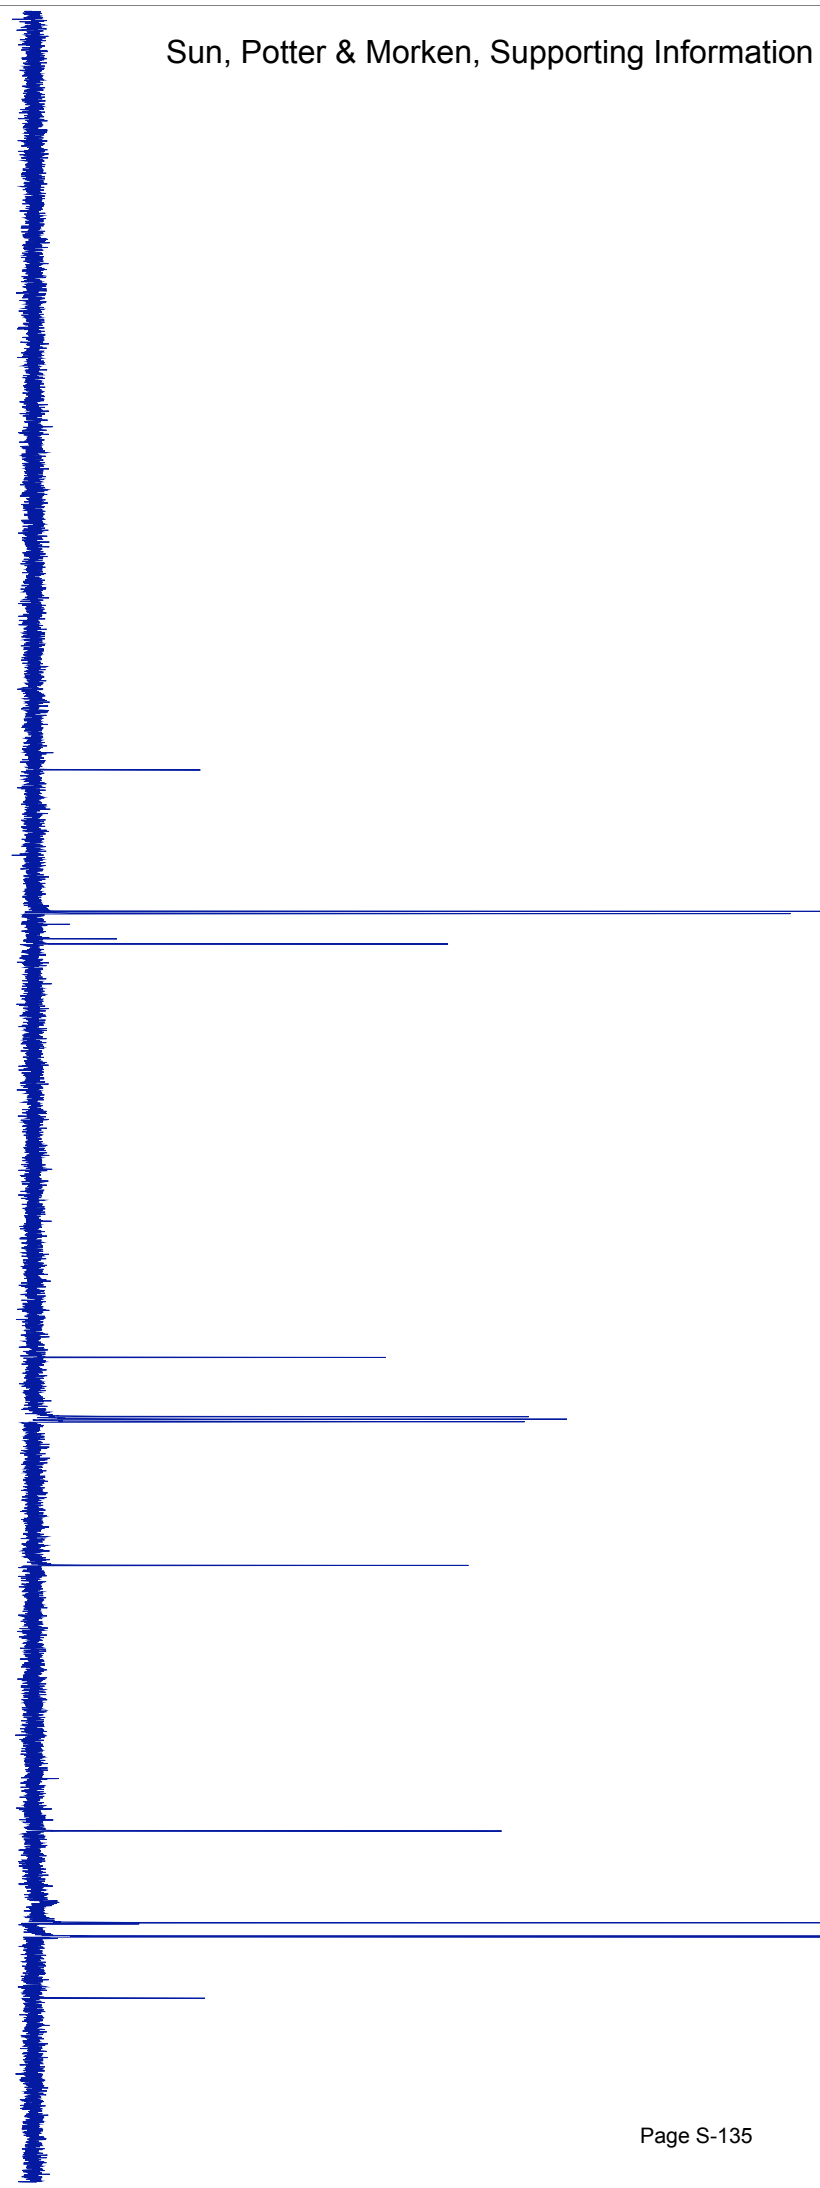

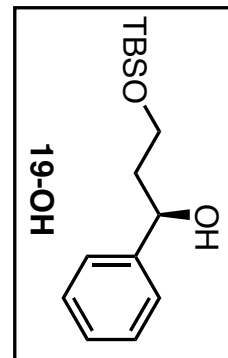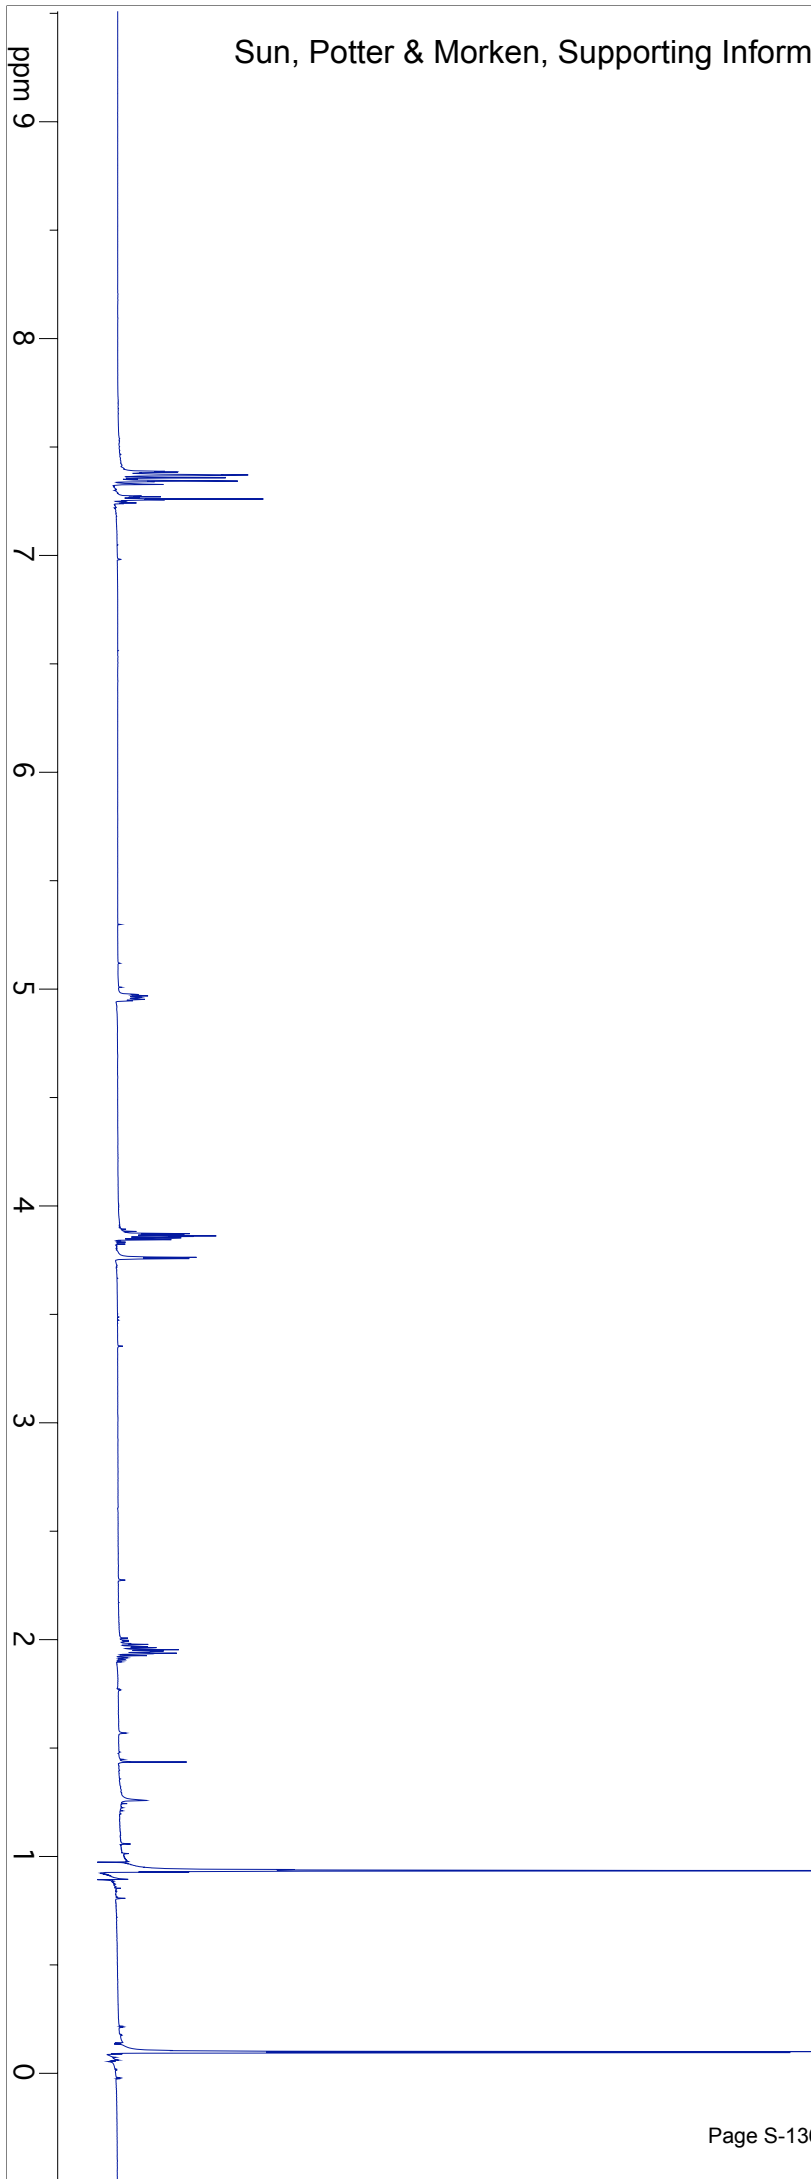



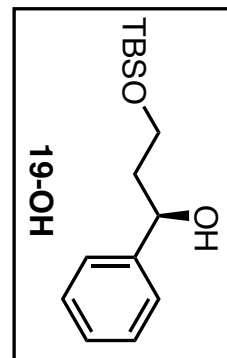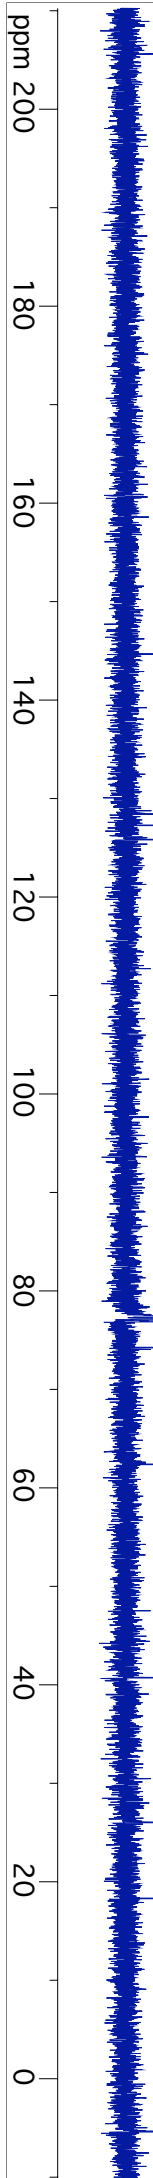

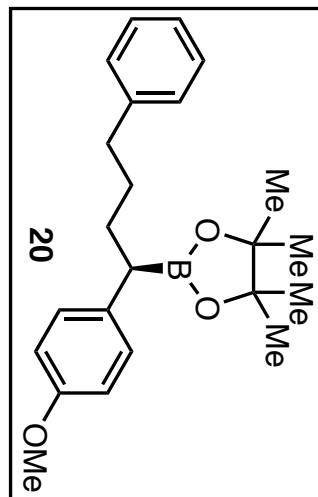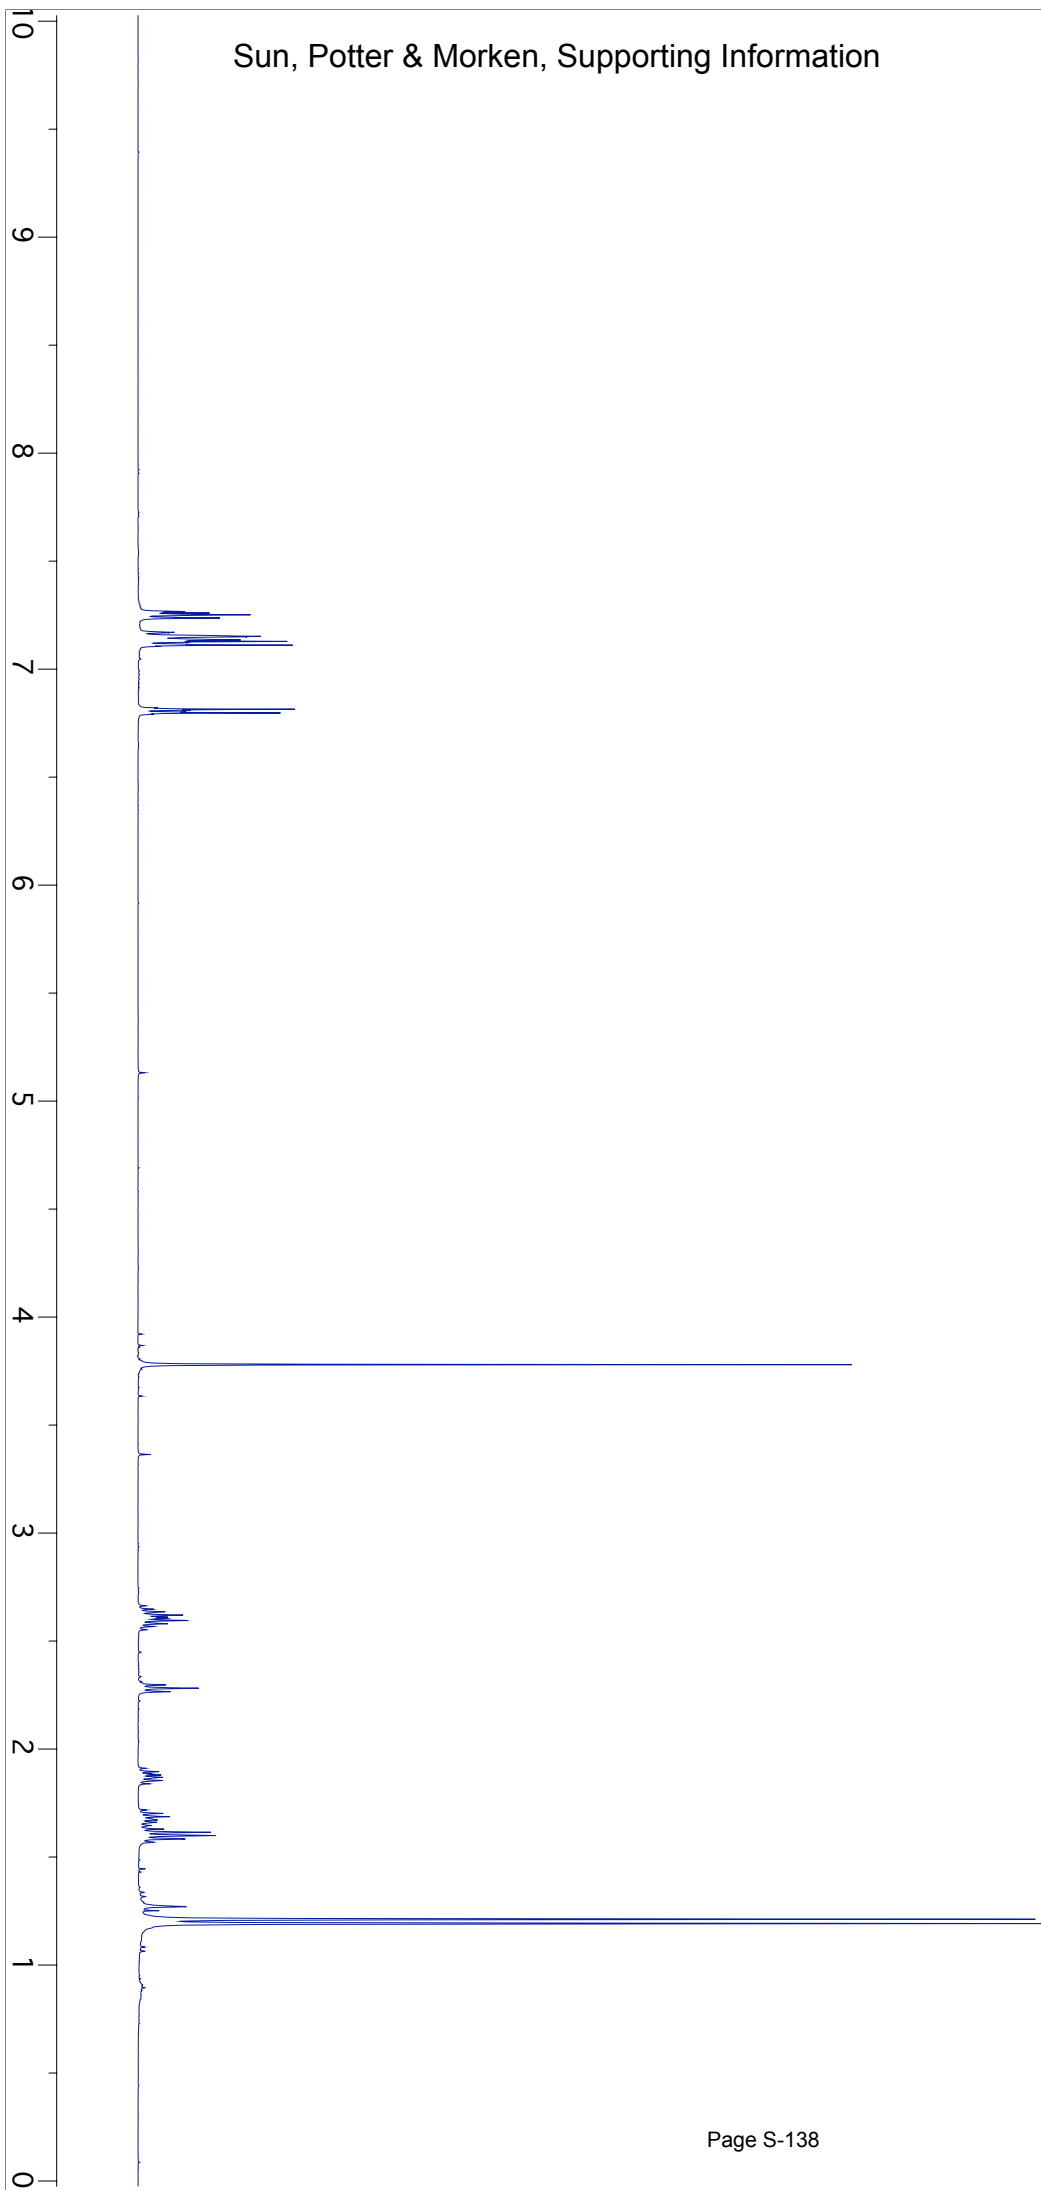

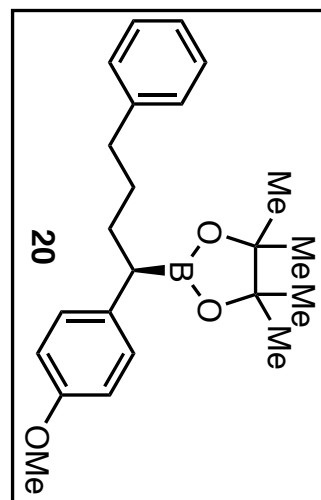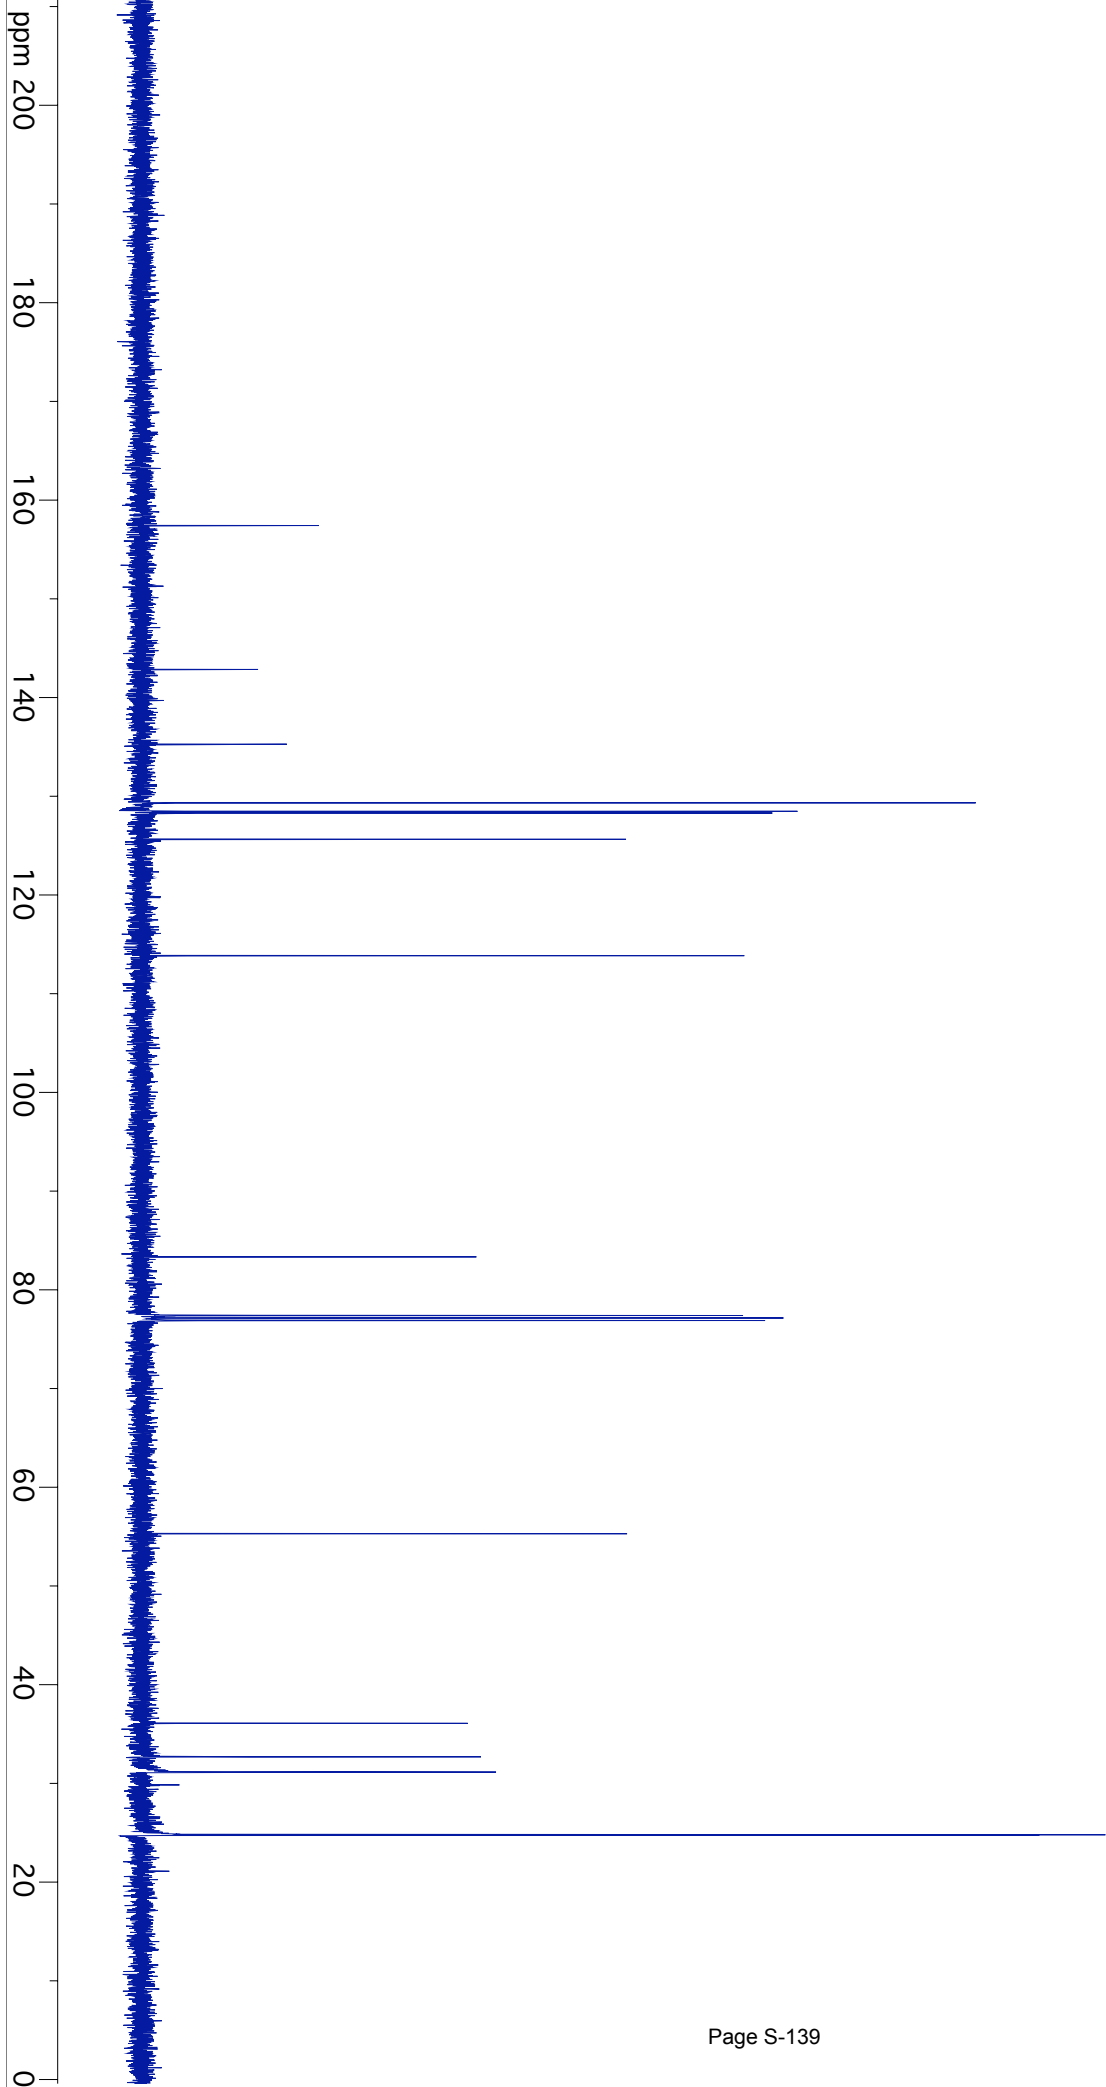

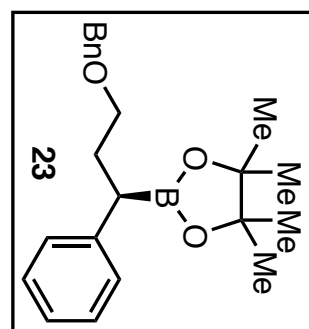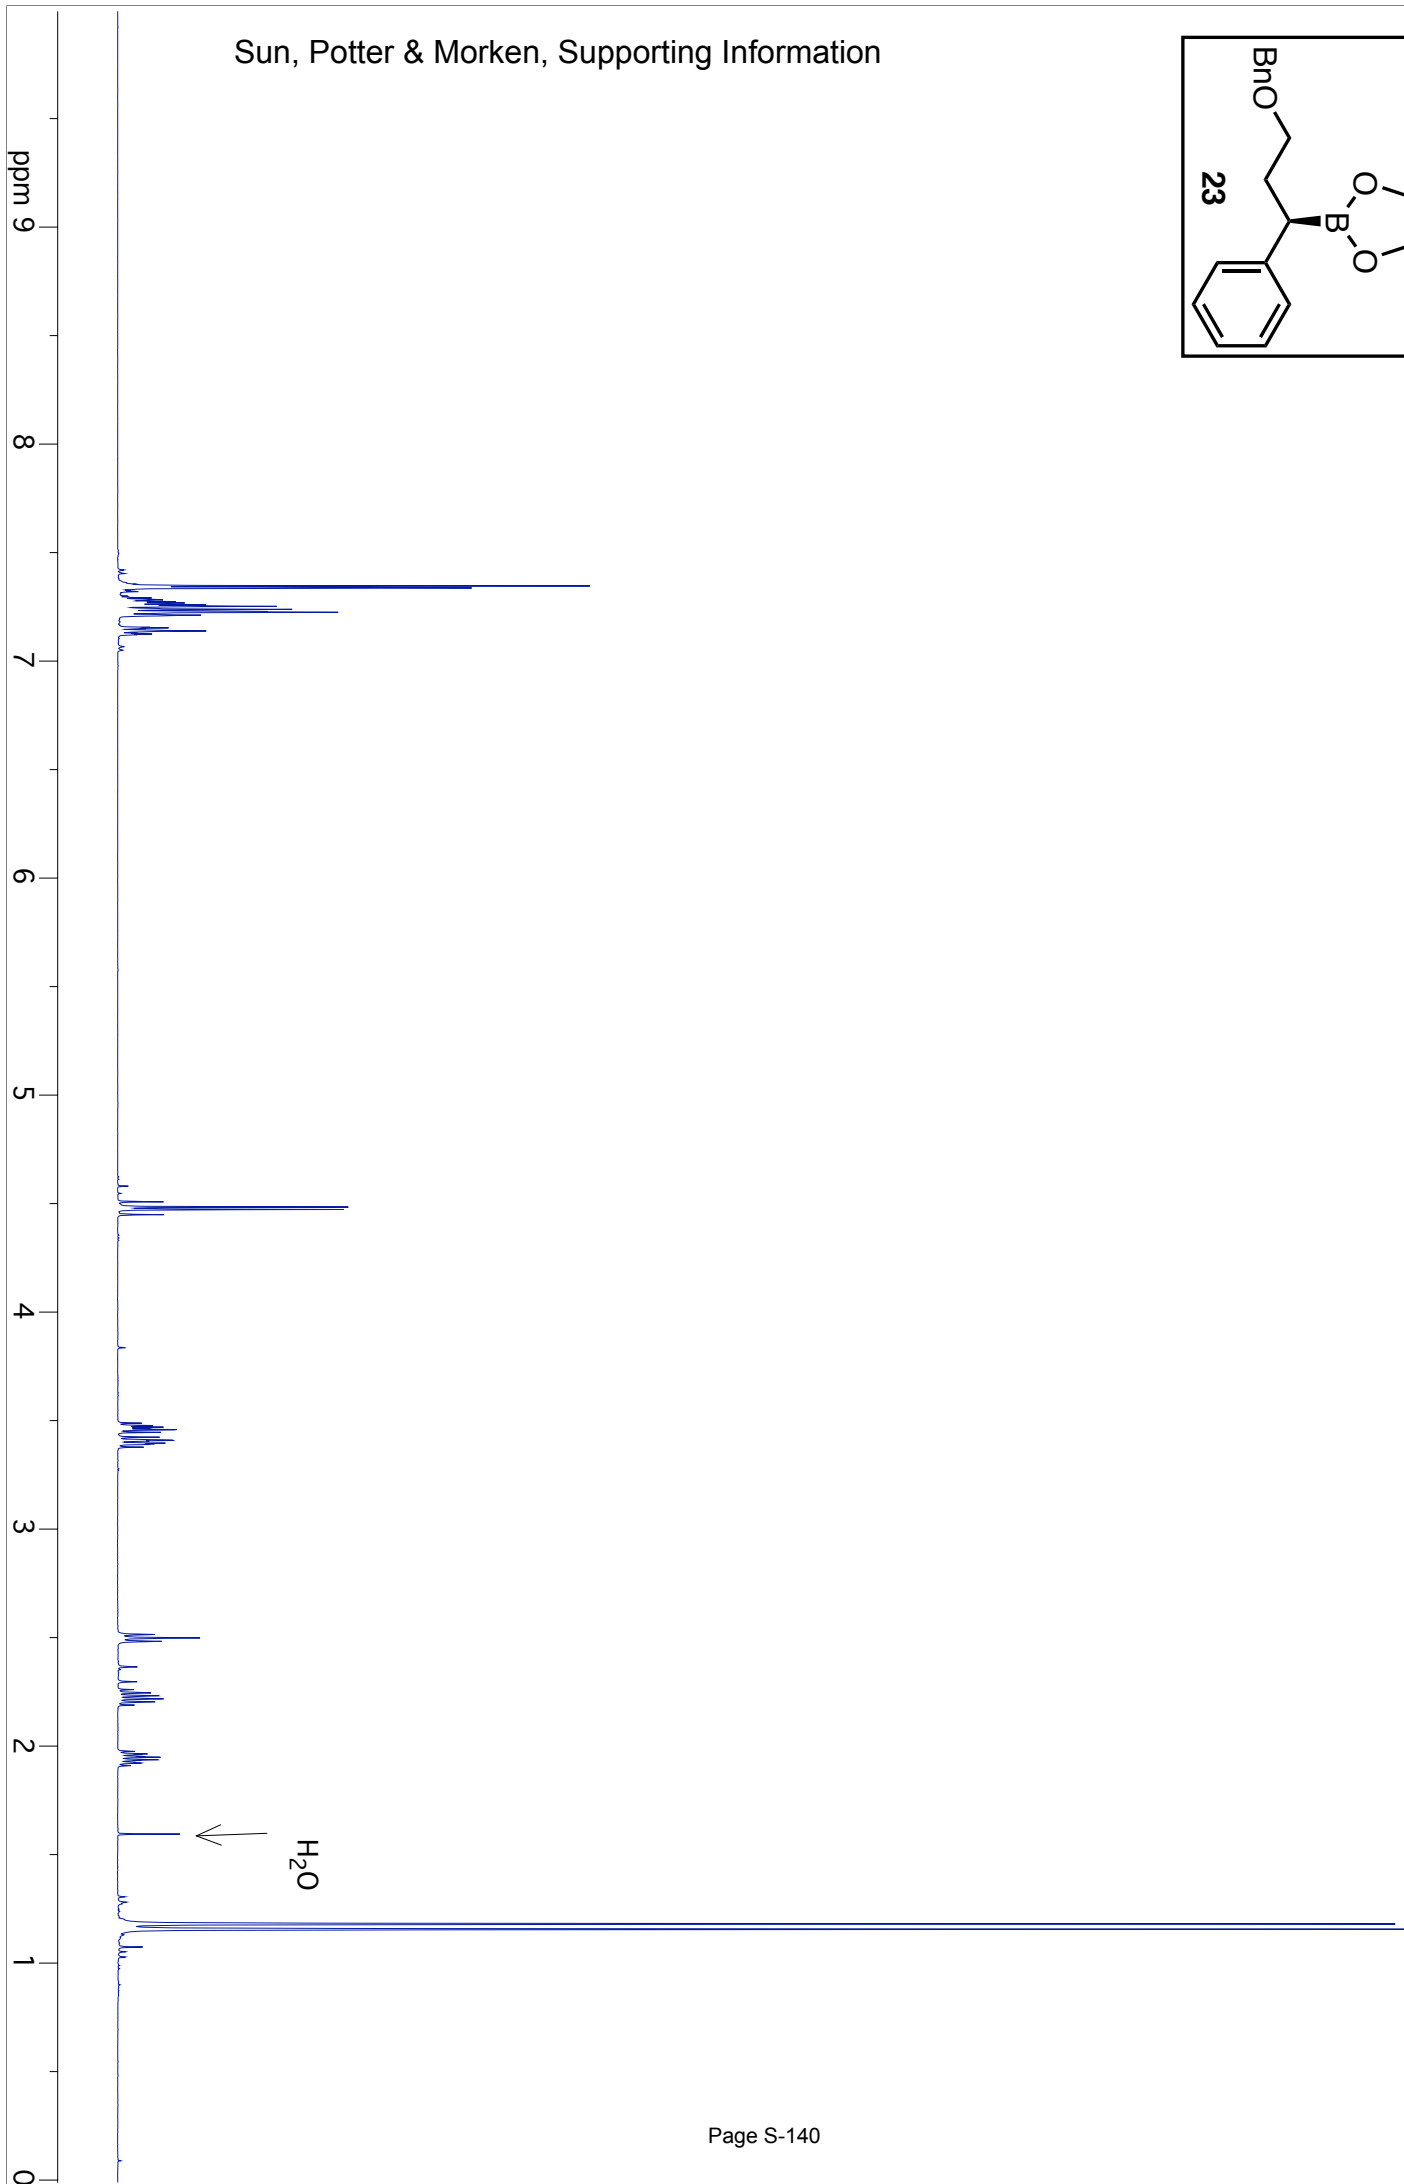

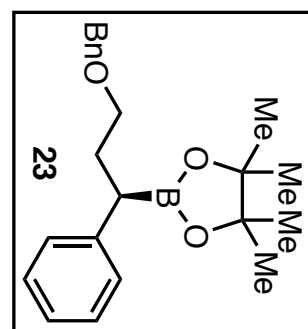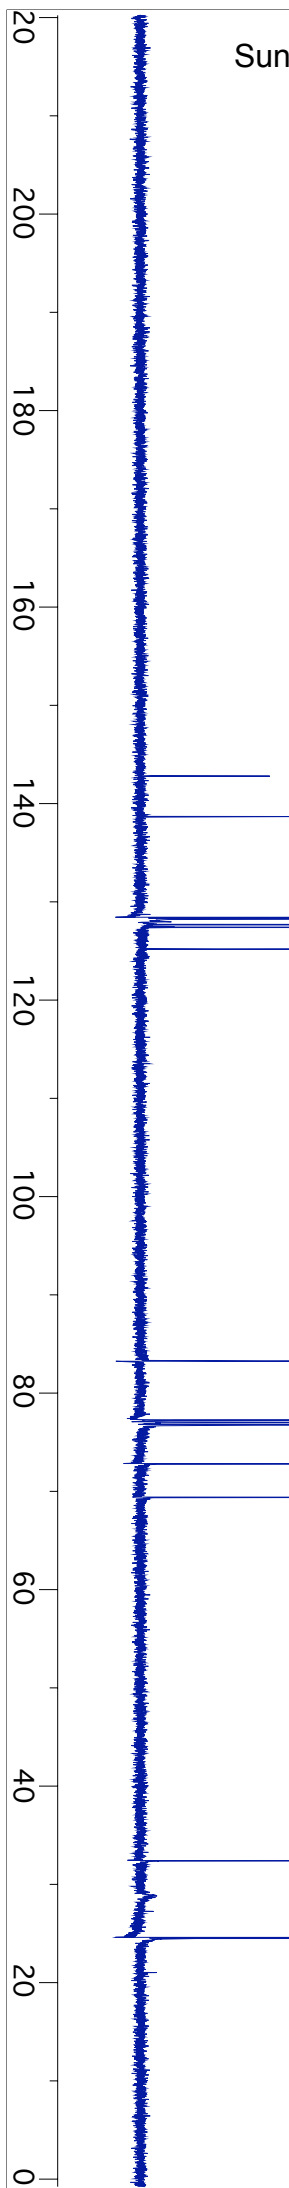

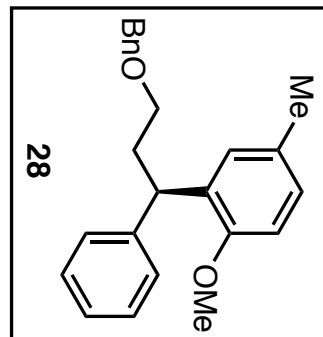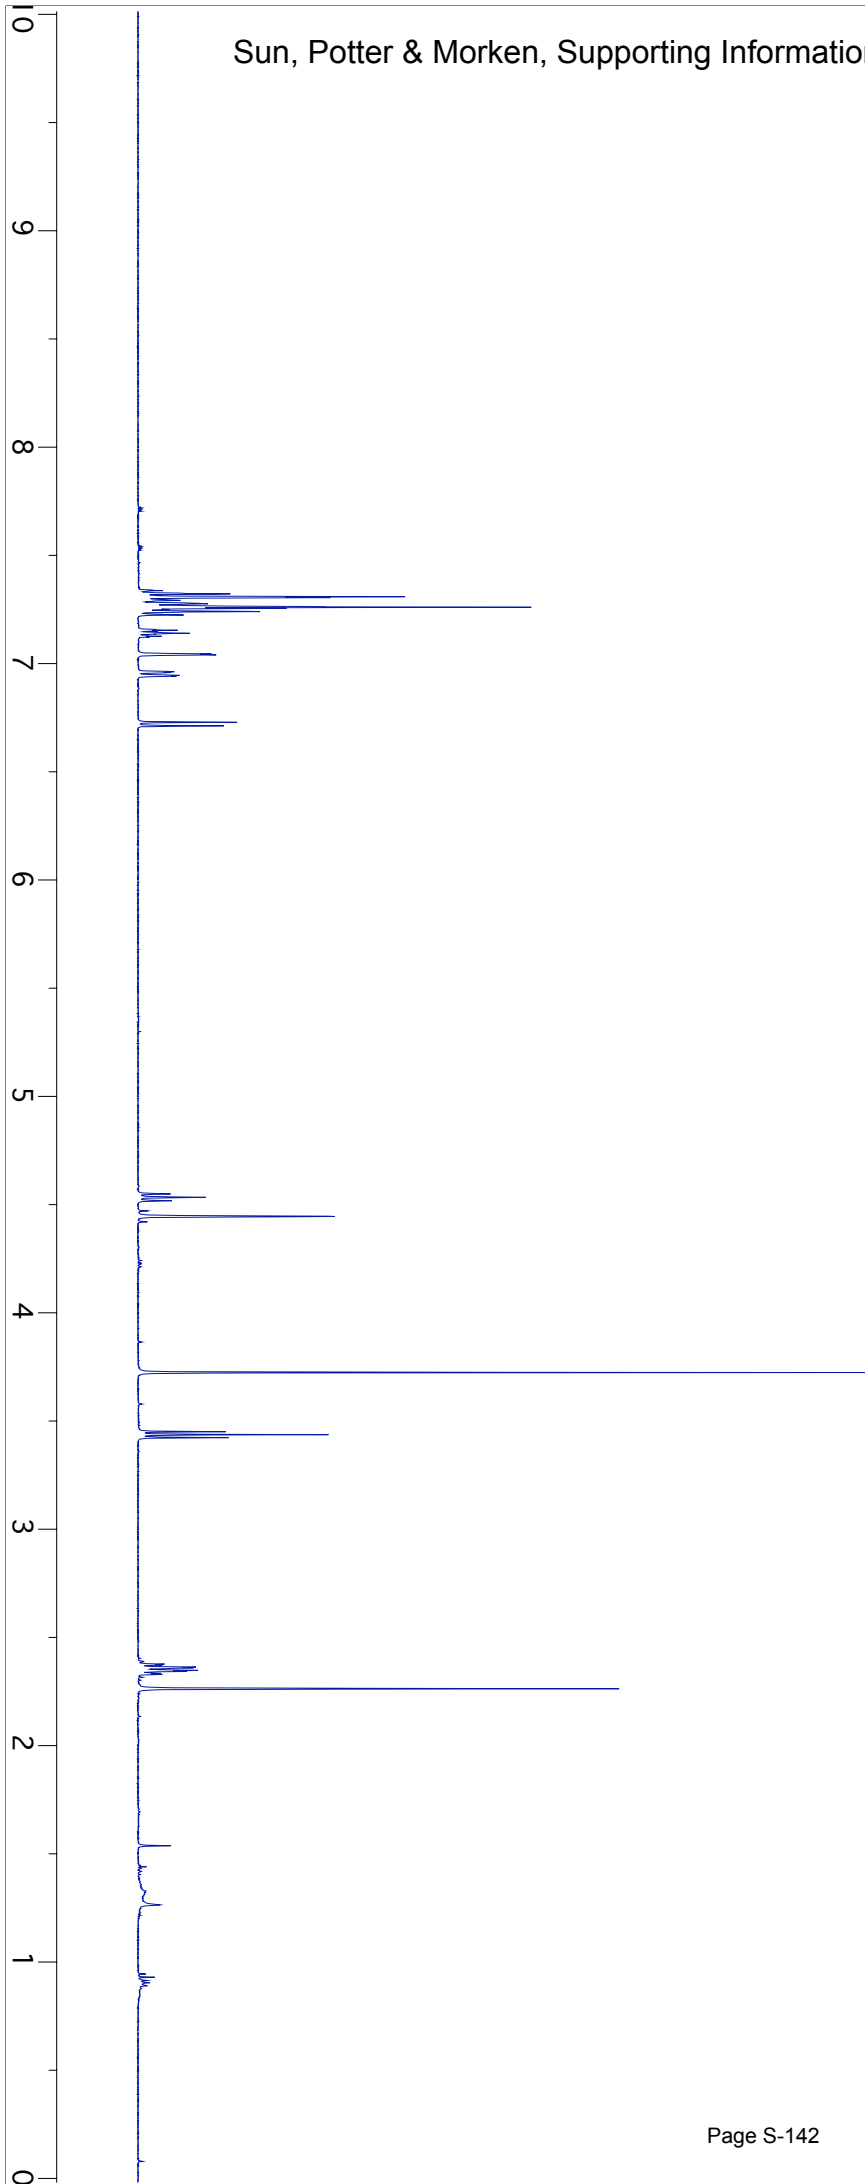

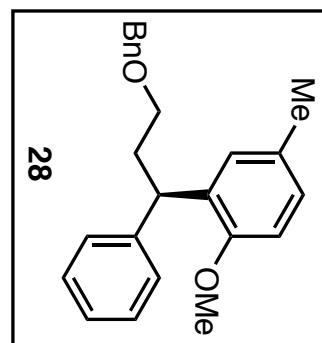

ppm 200  
180  
160  
140  
120  
100  
80  
60  
40  
20  
0

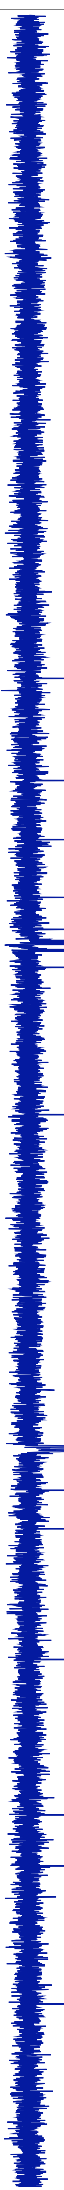

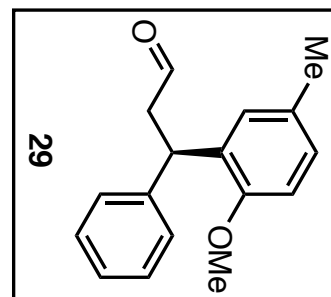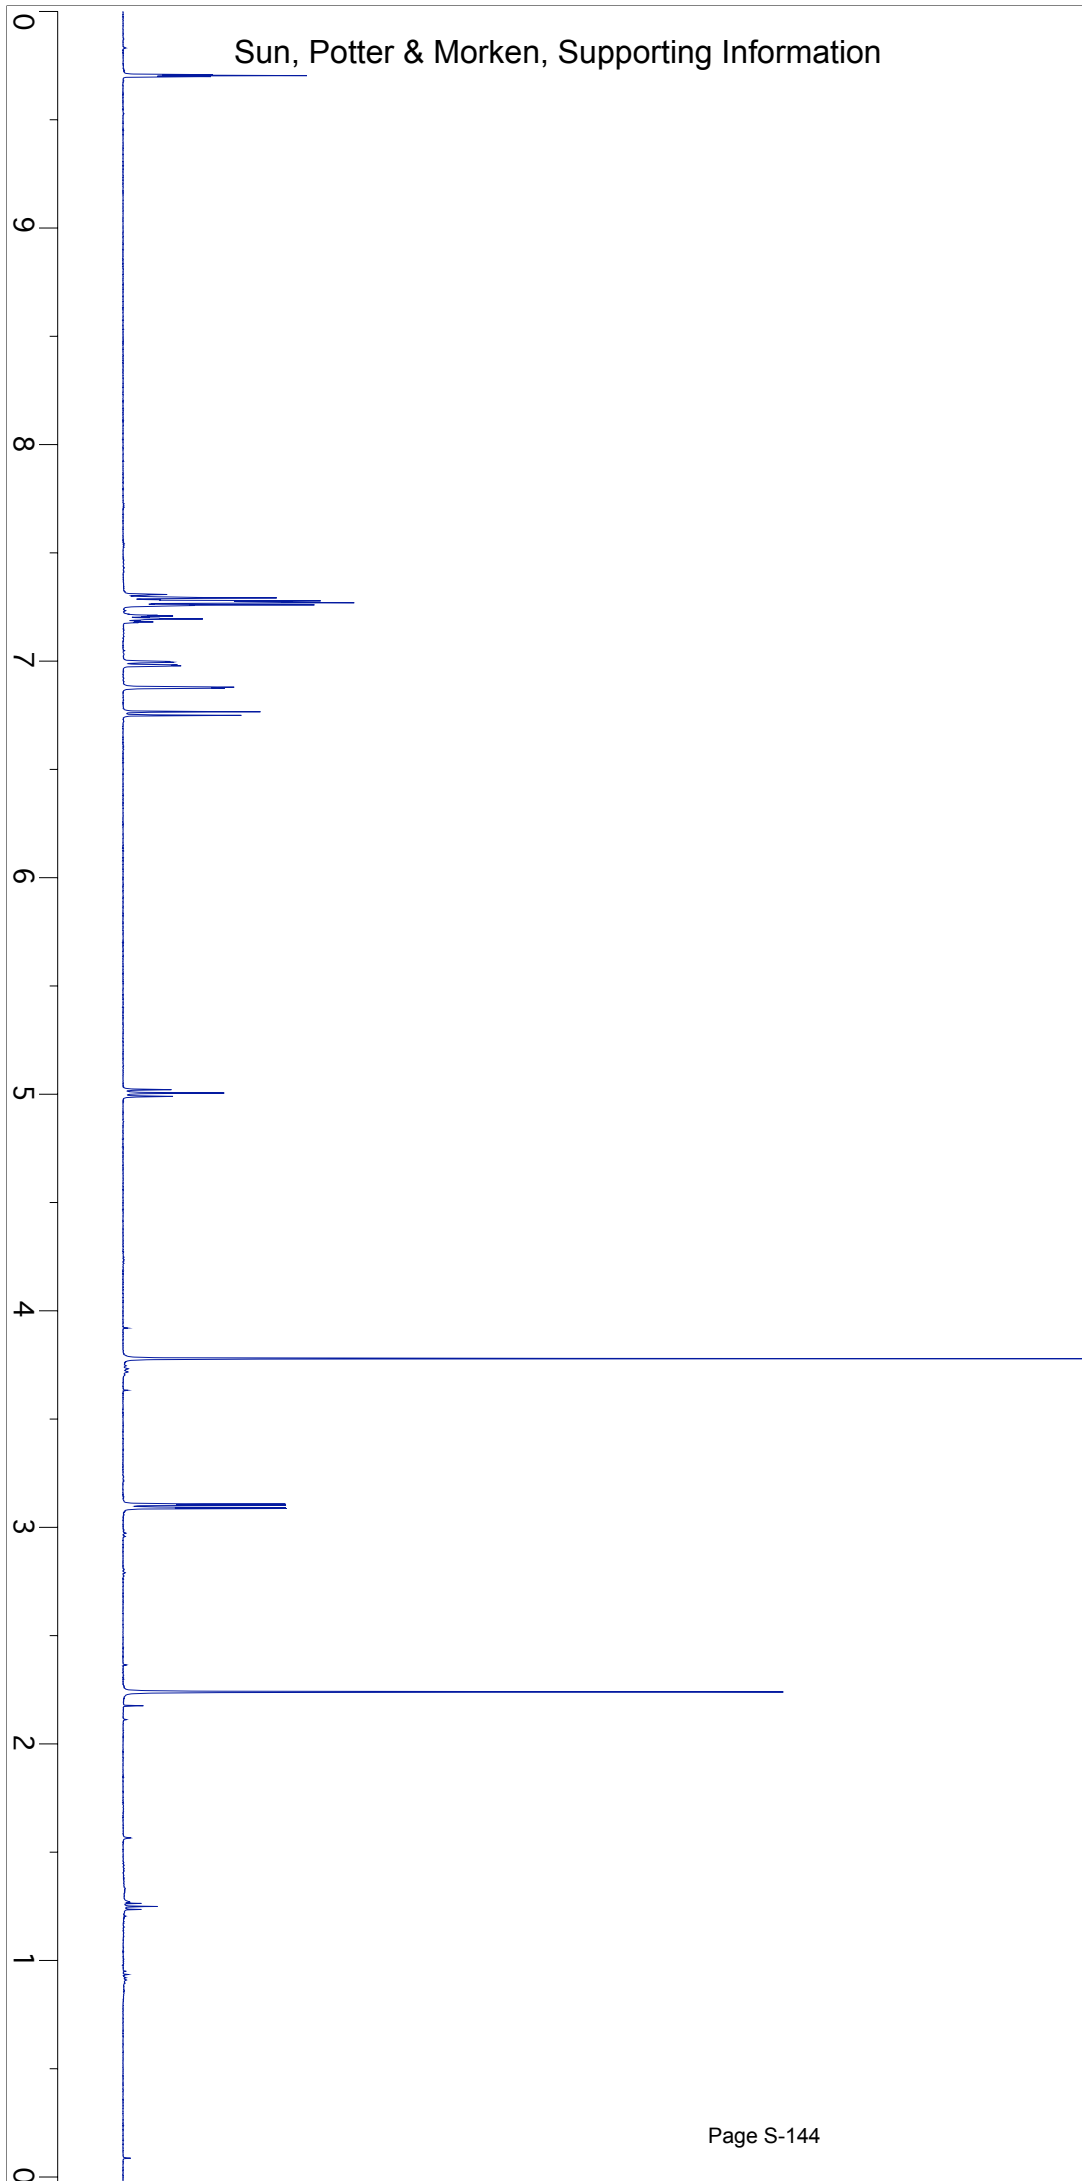



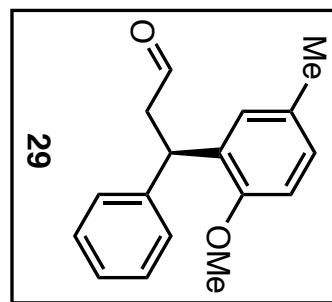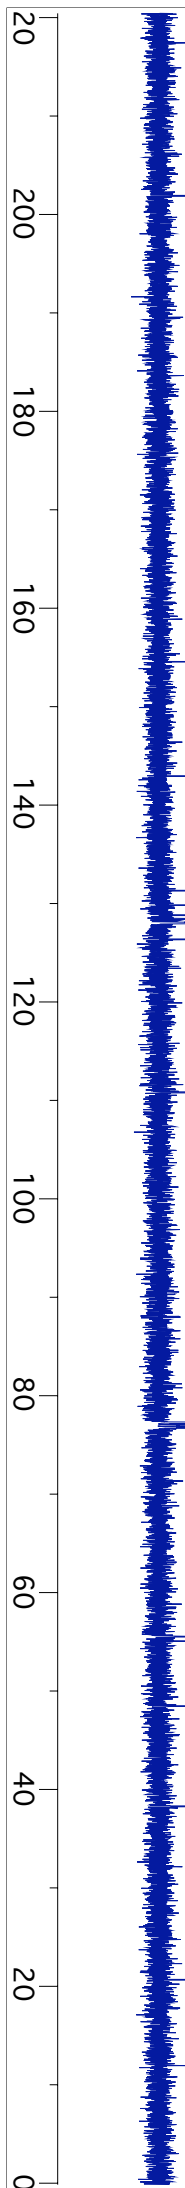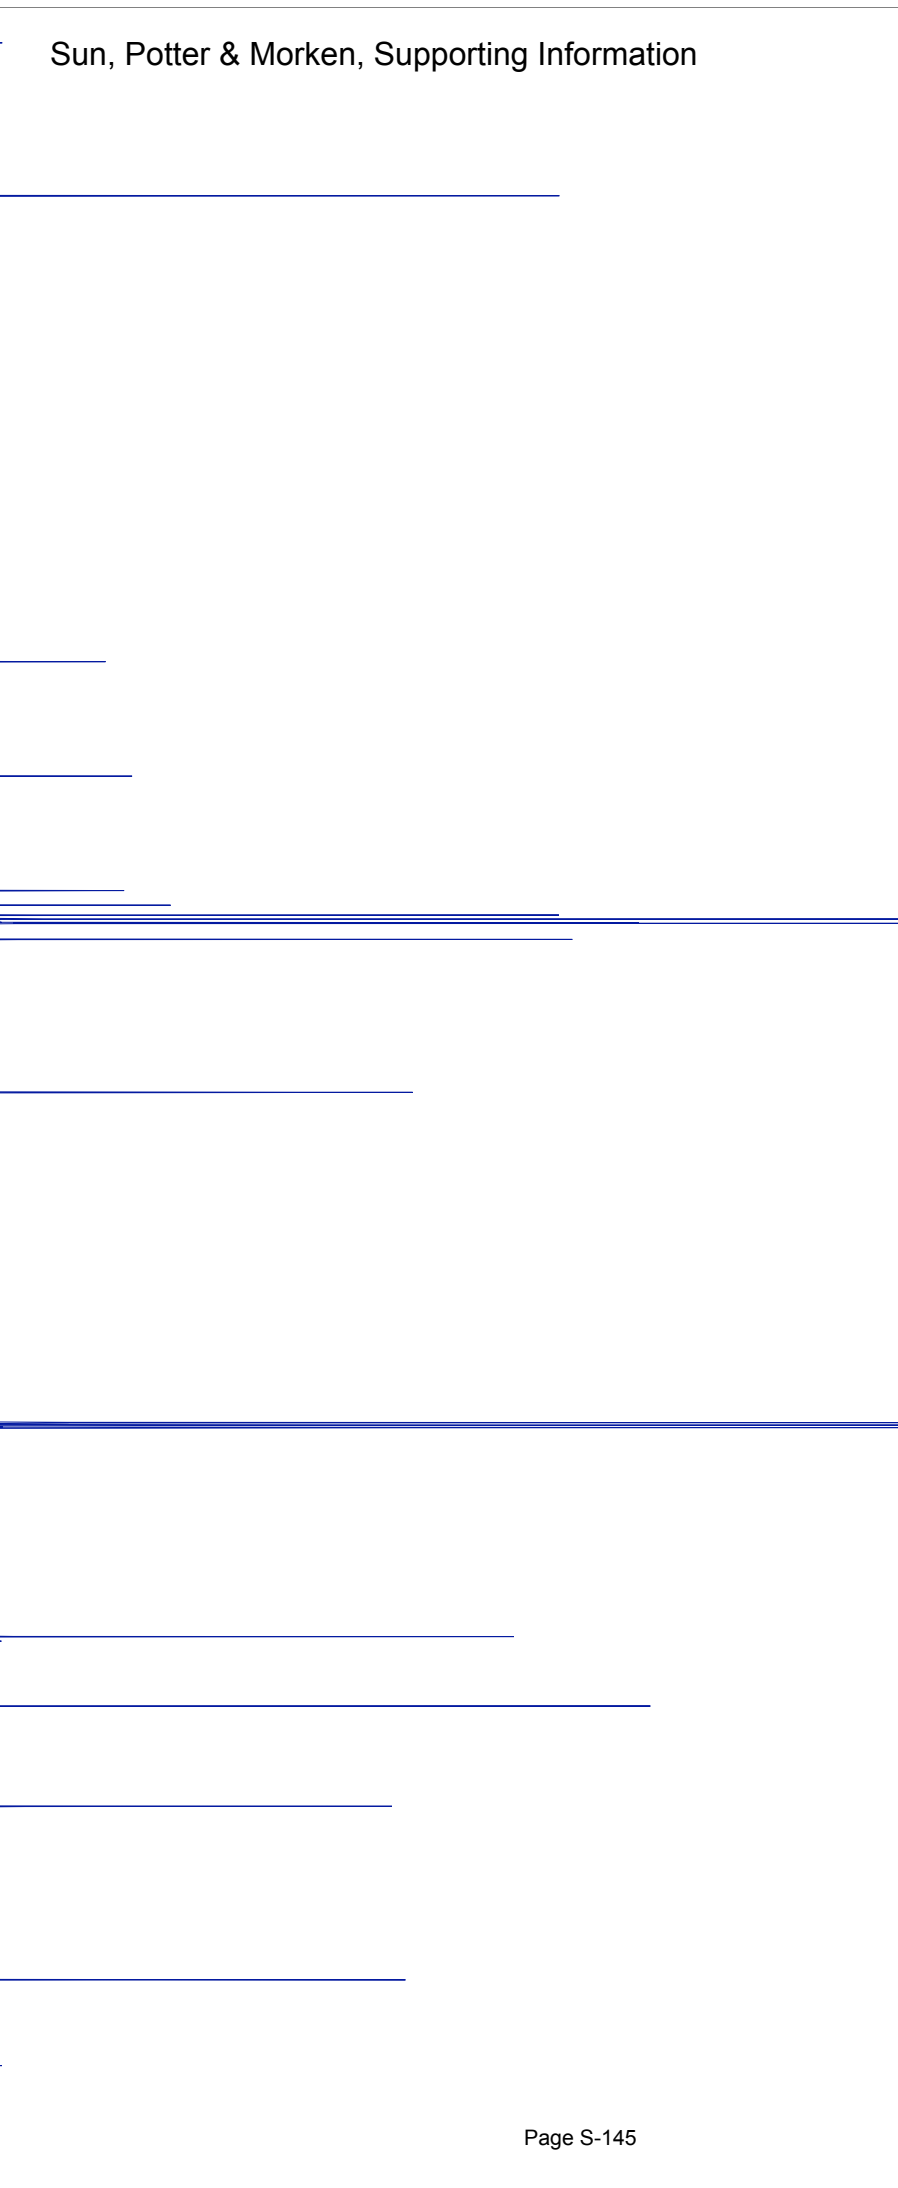

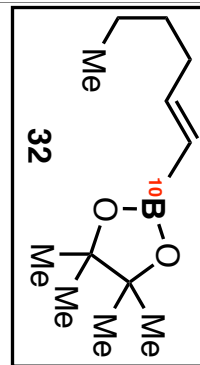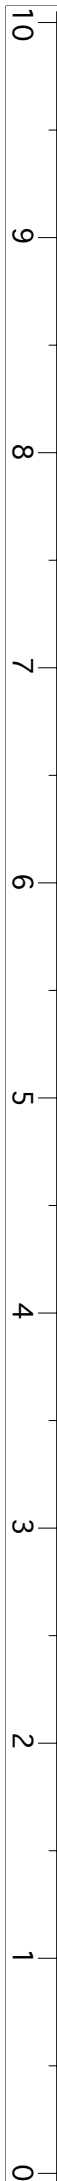

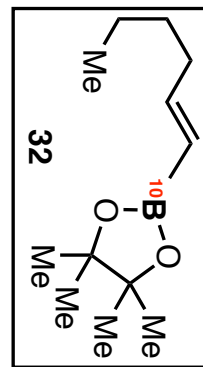

ppm 200  
180  
160  
140  
120  
100  
80  
60  
40  
20  
0

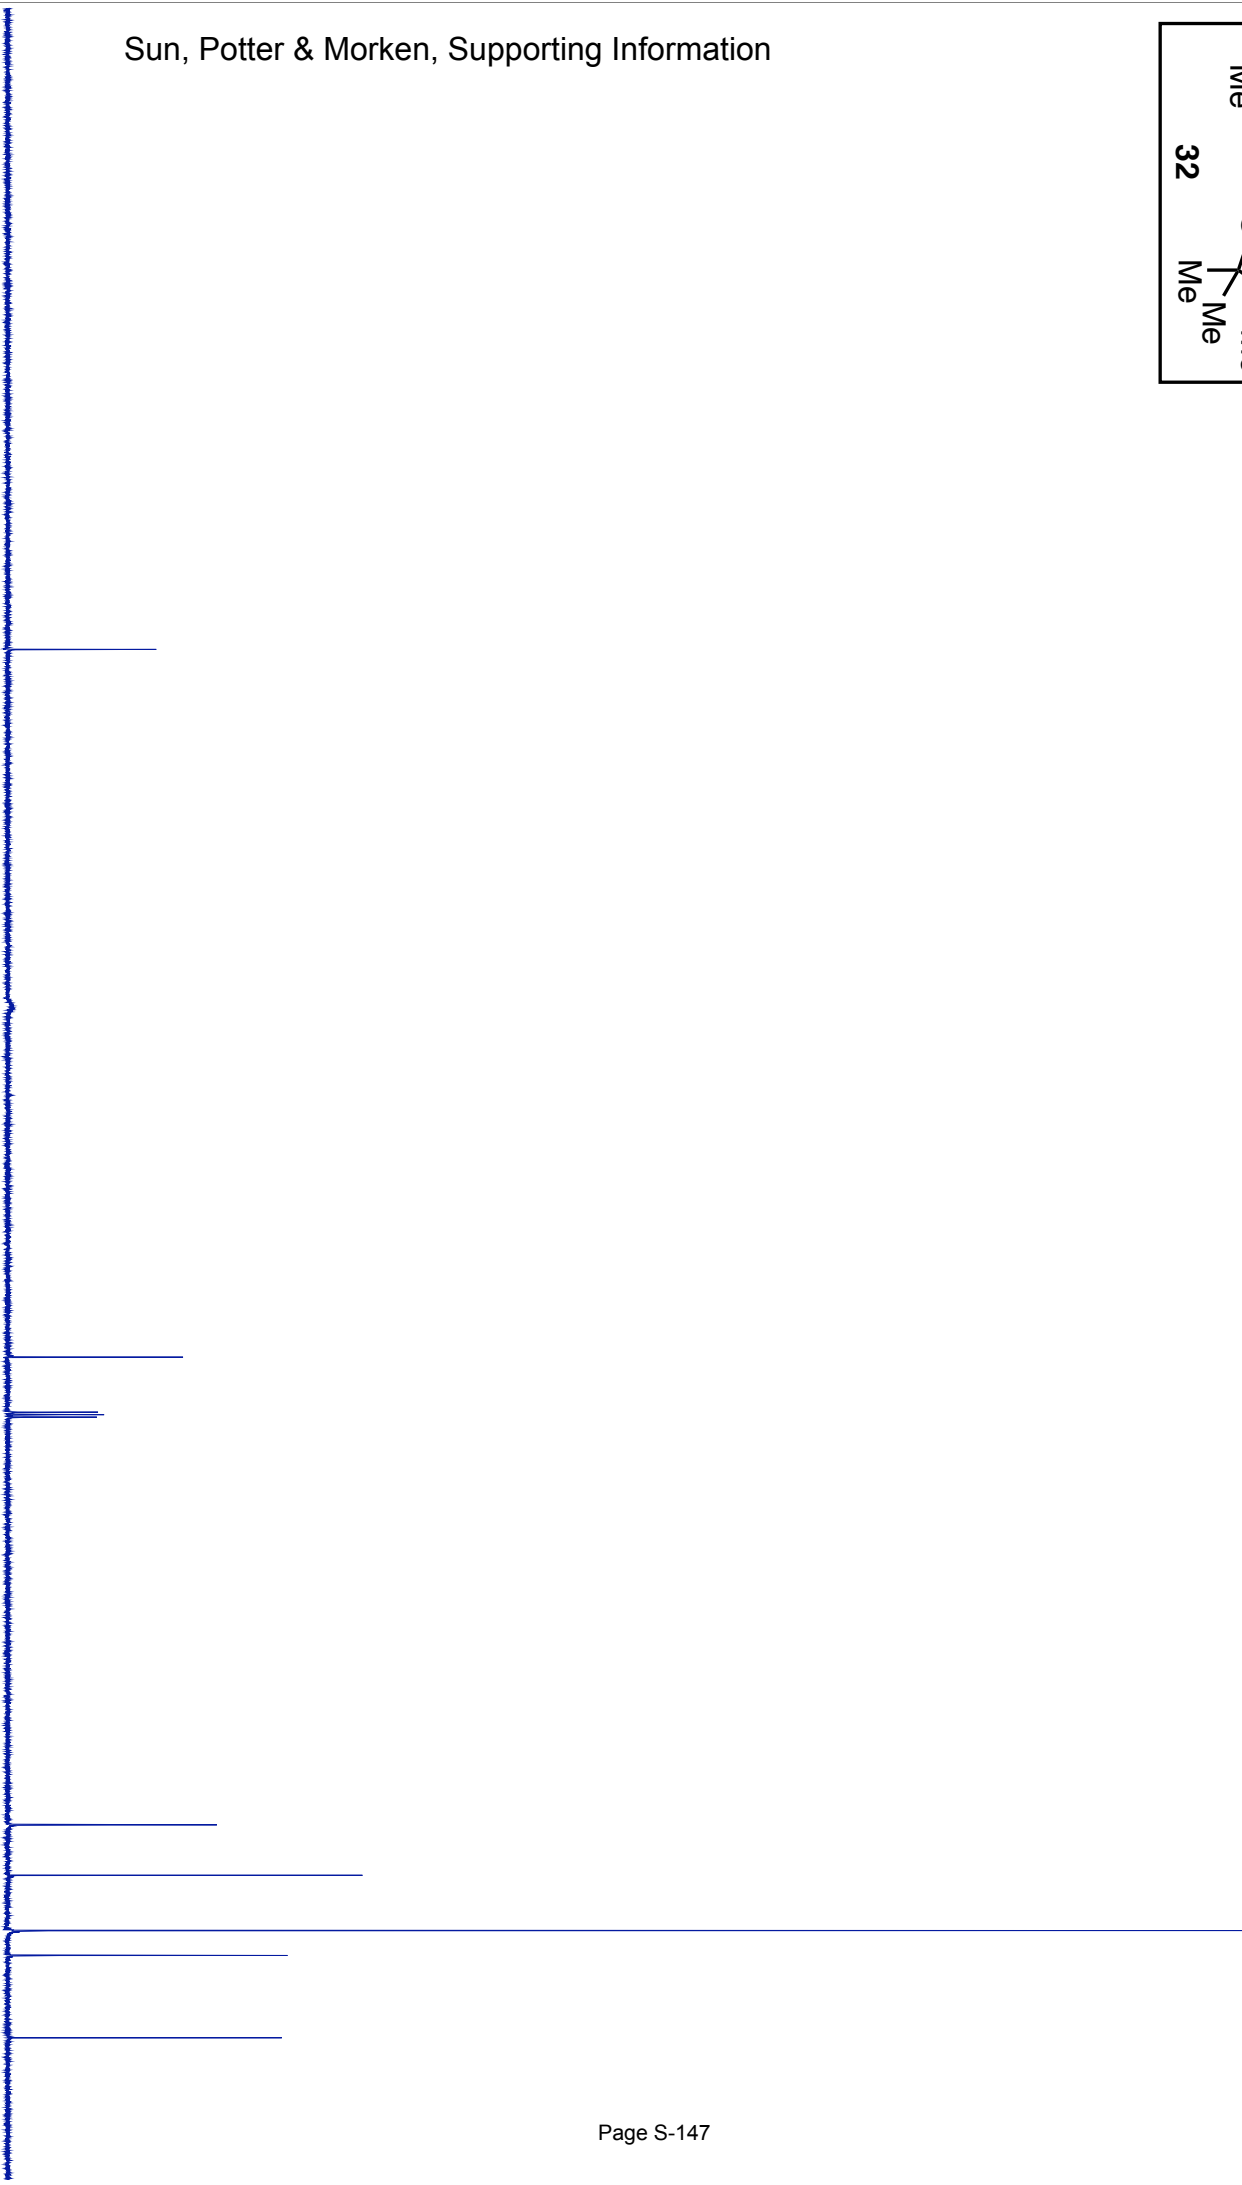

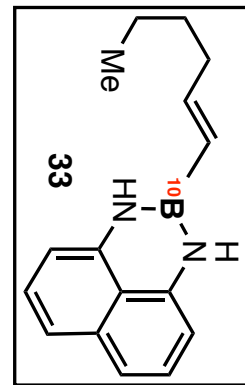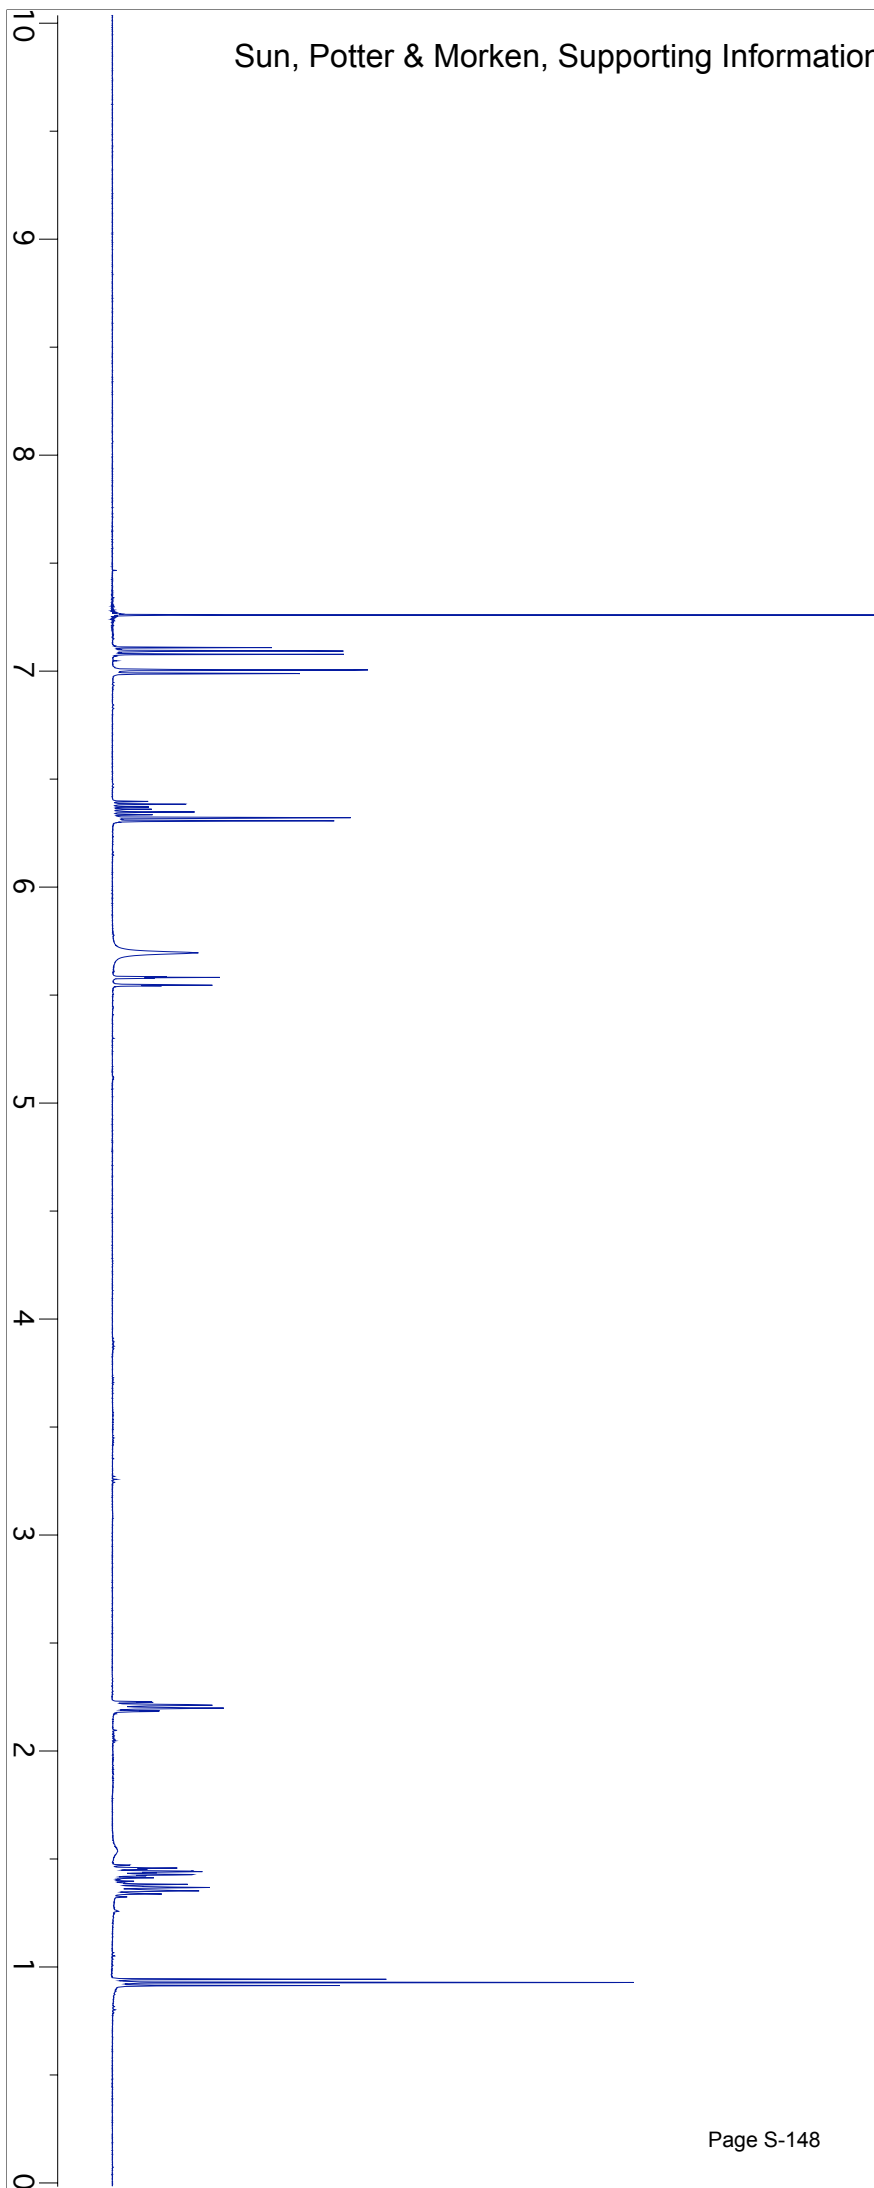

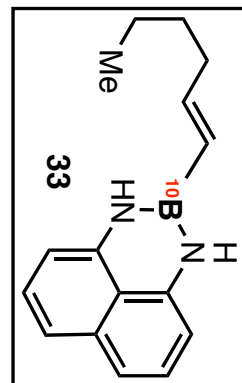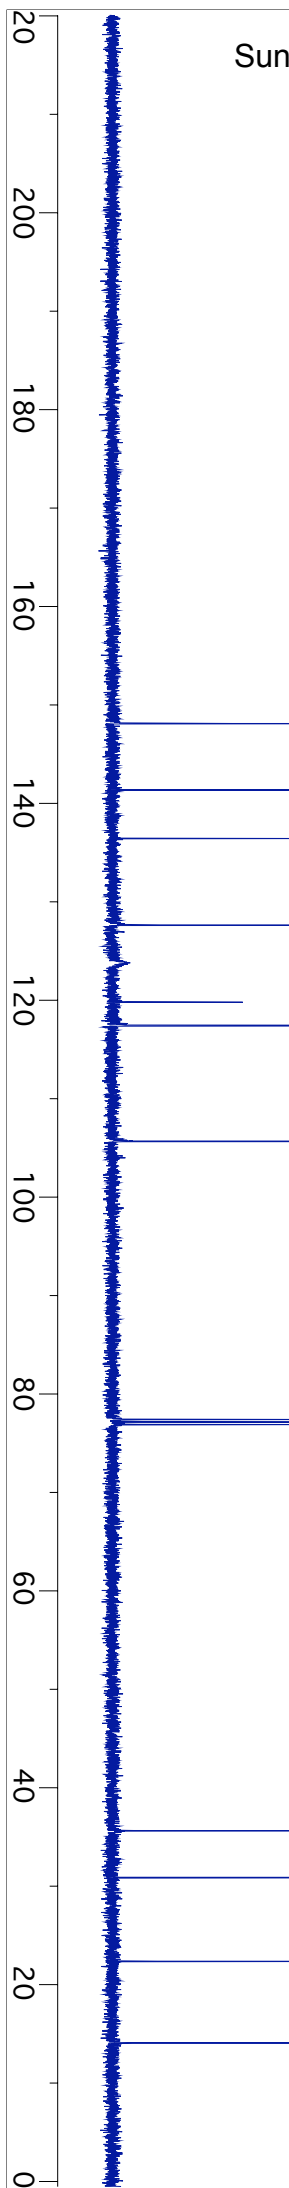

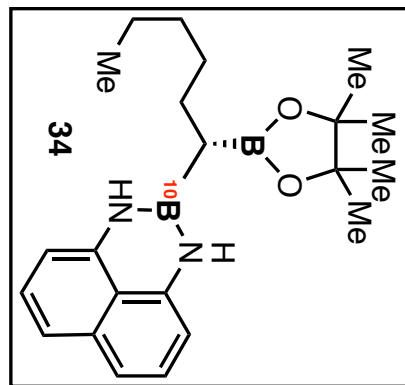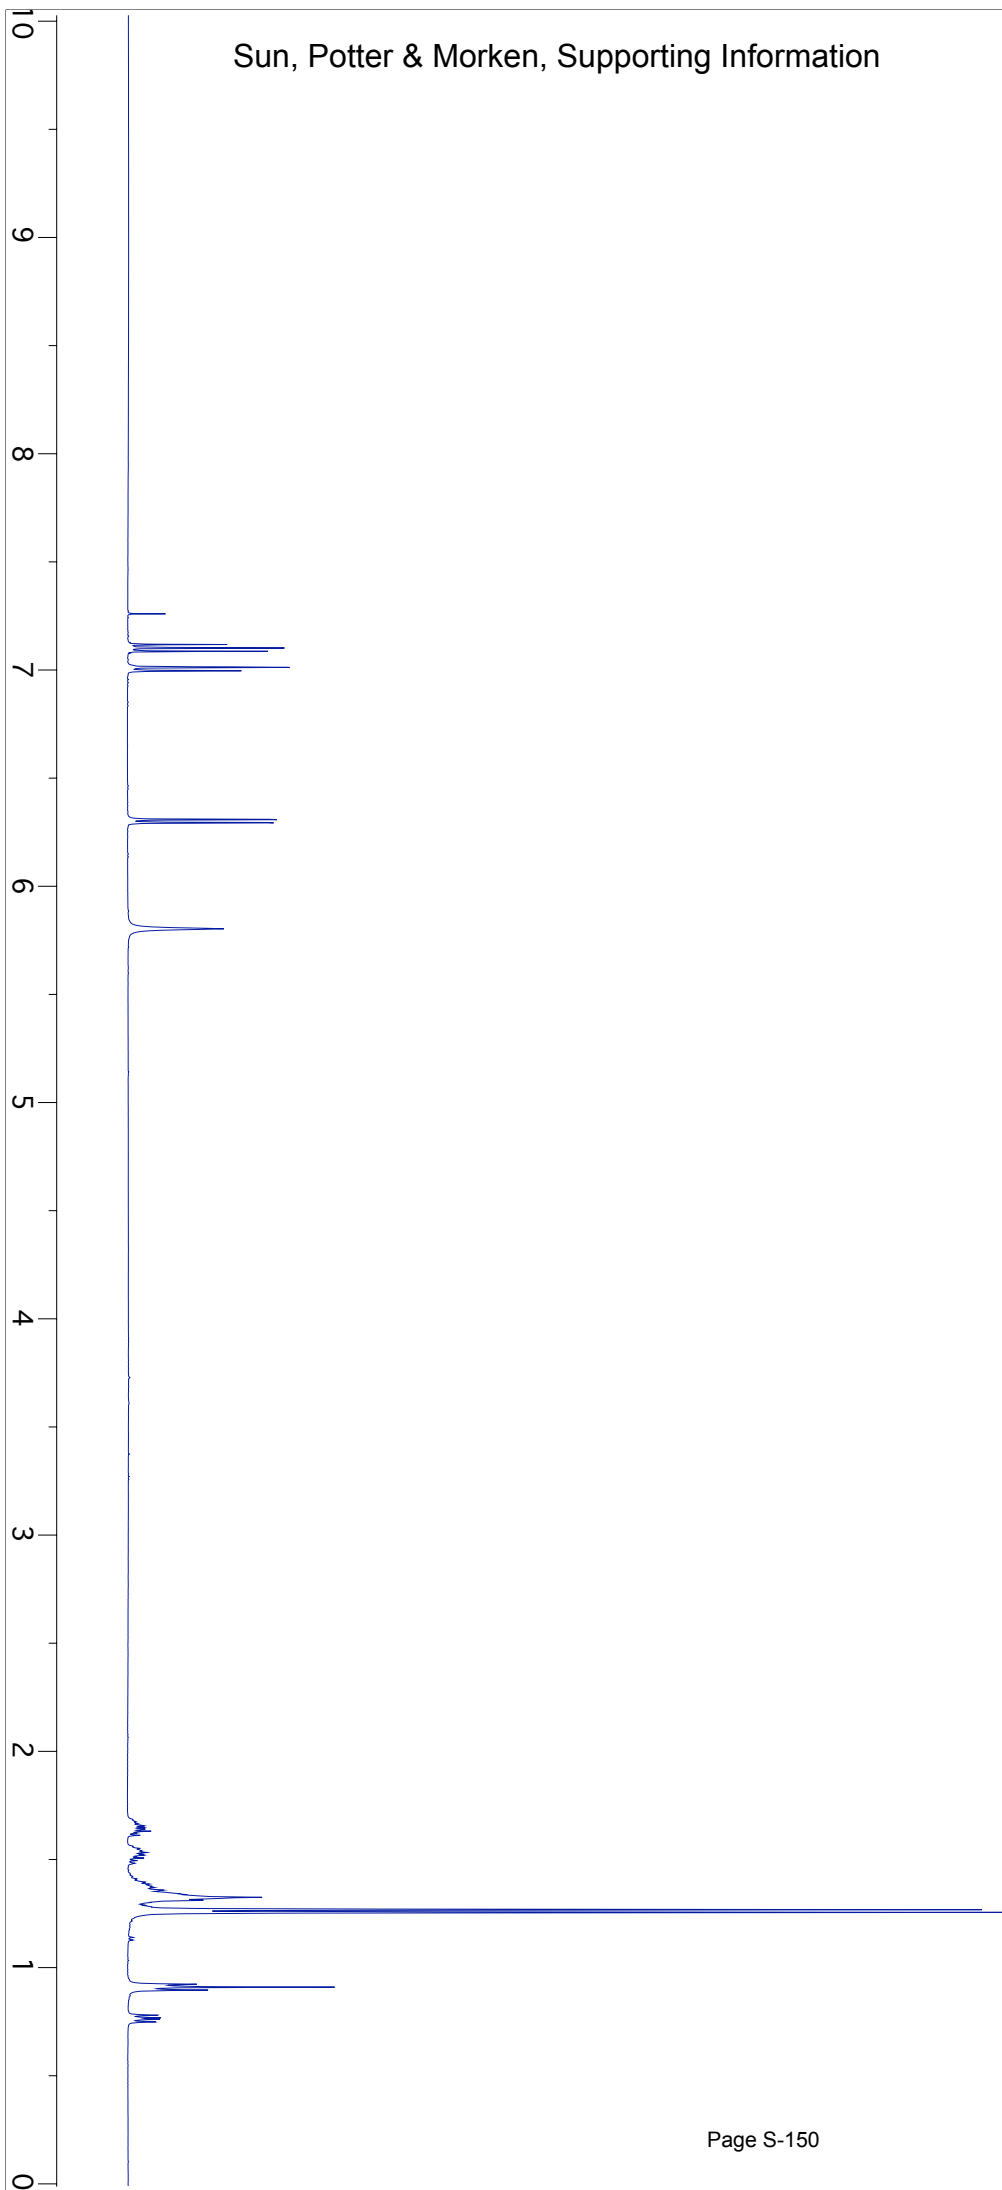

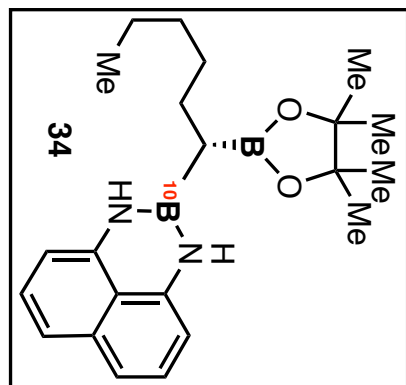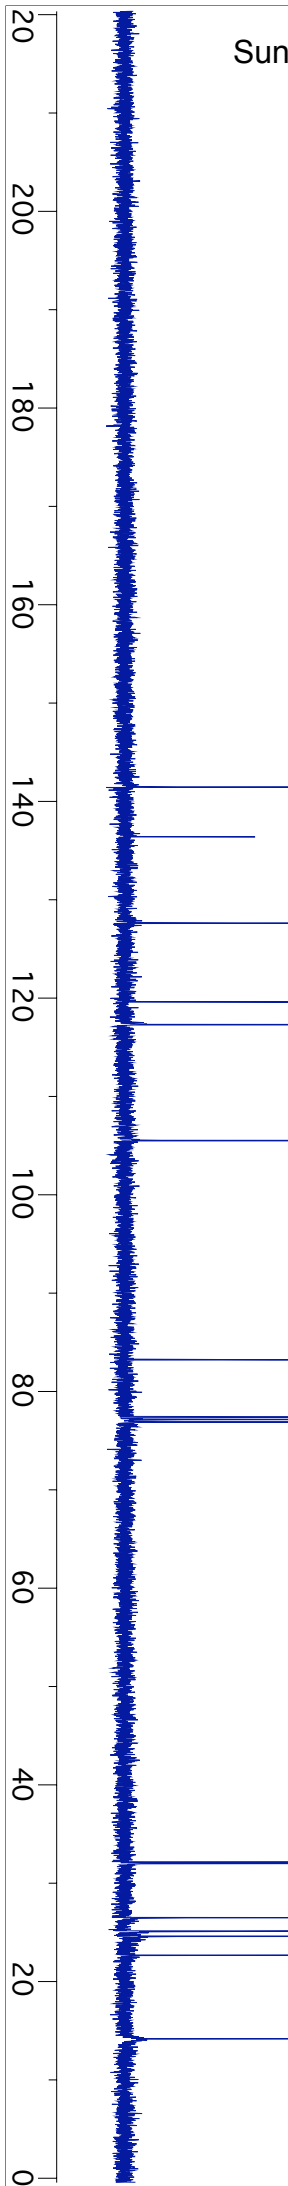

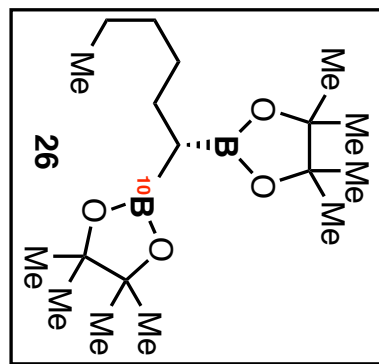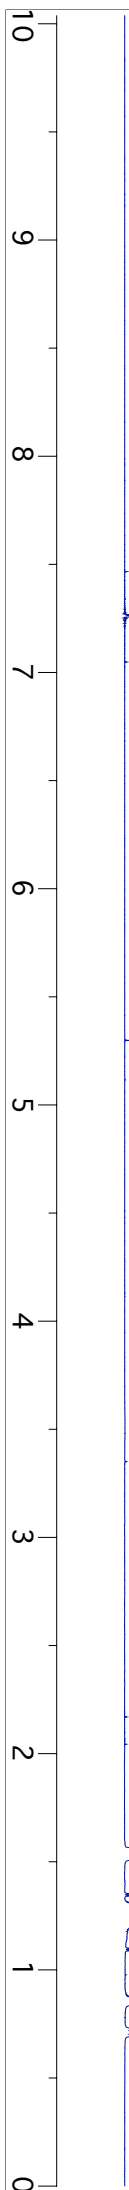



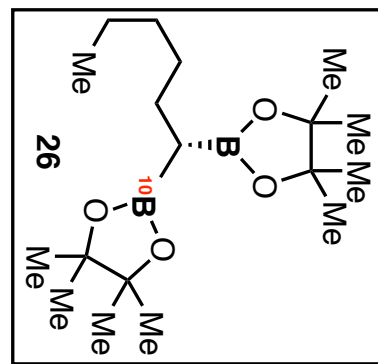

ppm 200  
180  
160  
140  
120  
100  
80  
60  
40  
20  
0

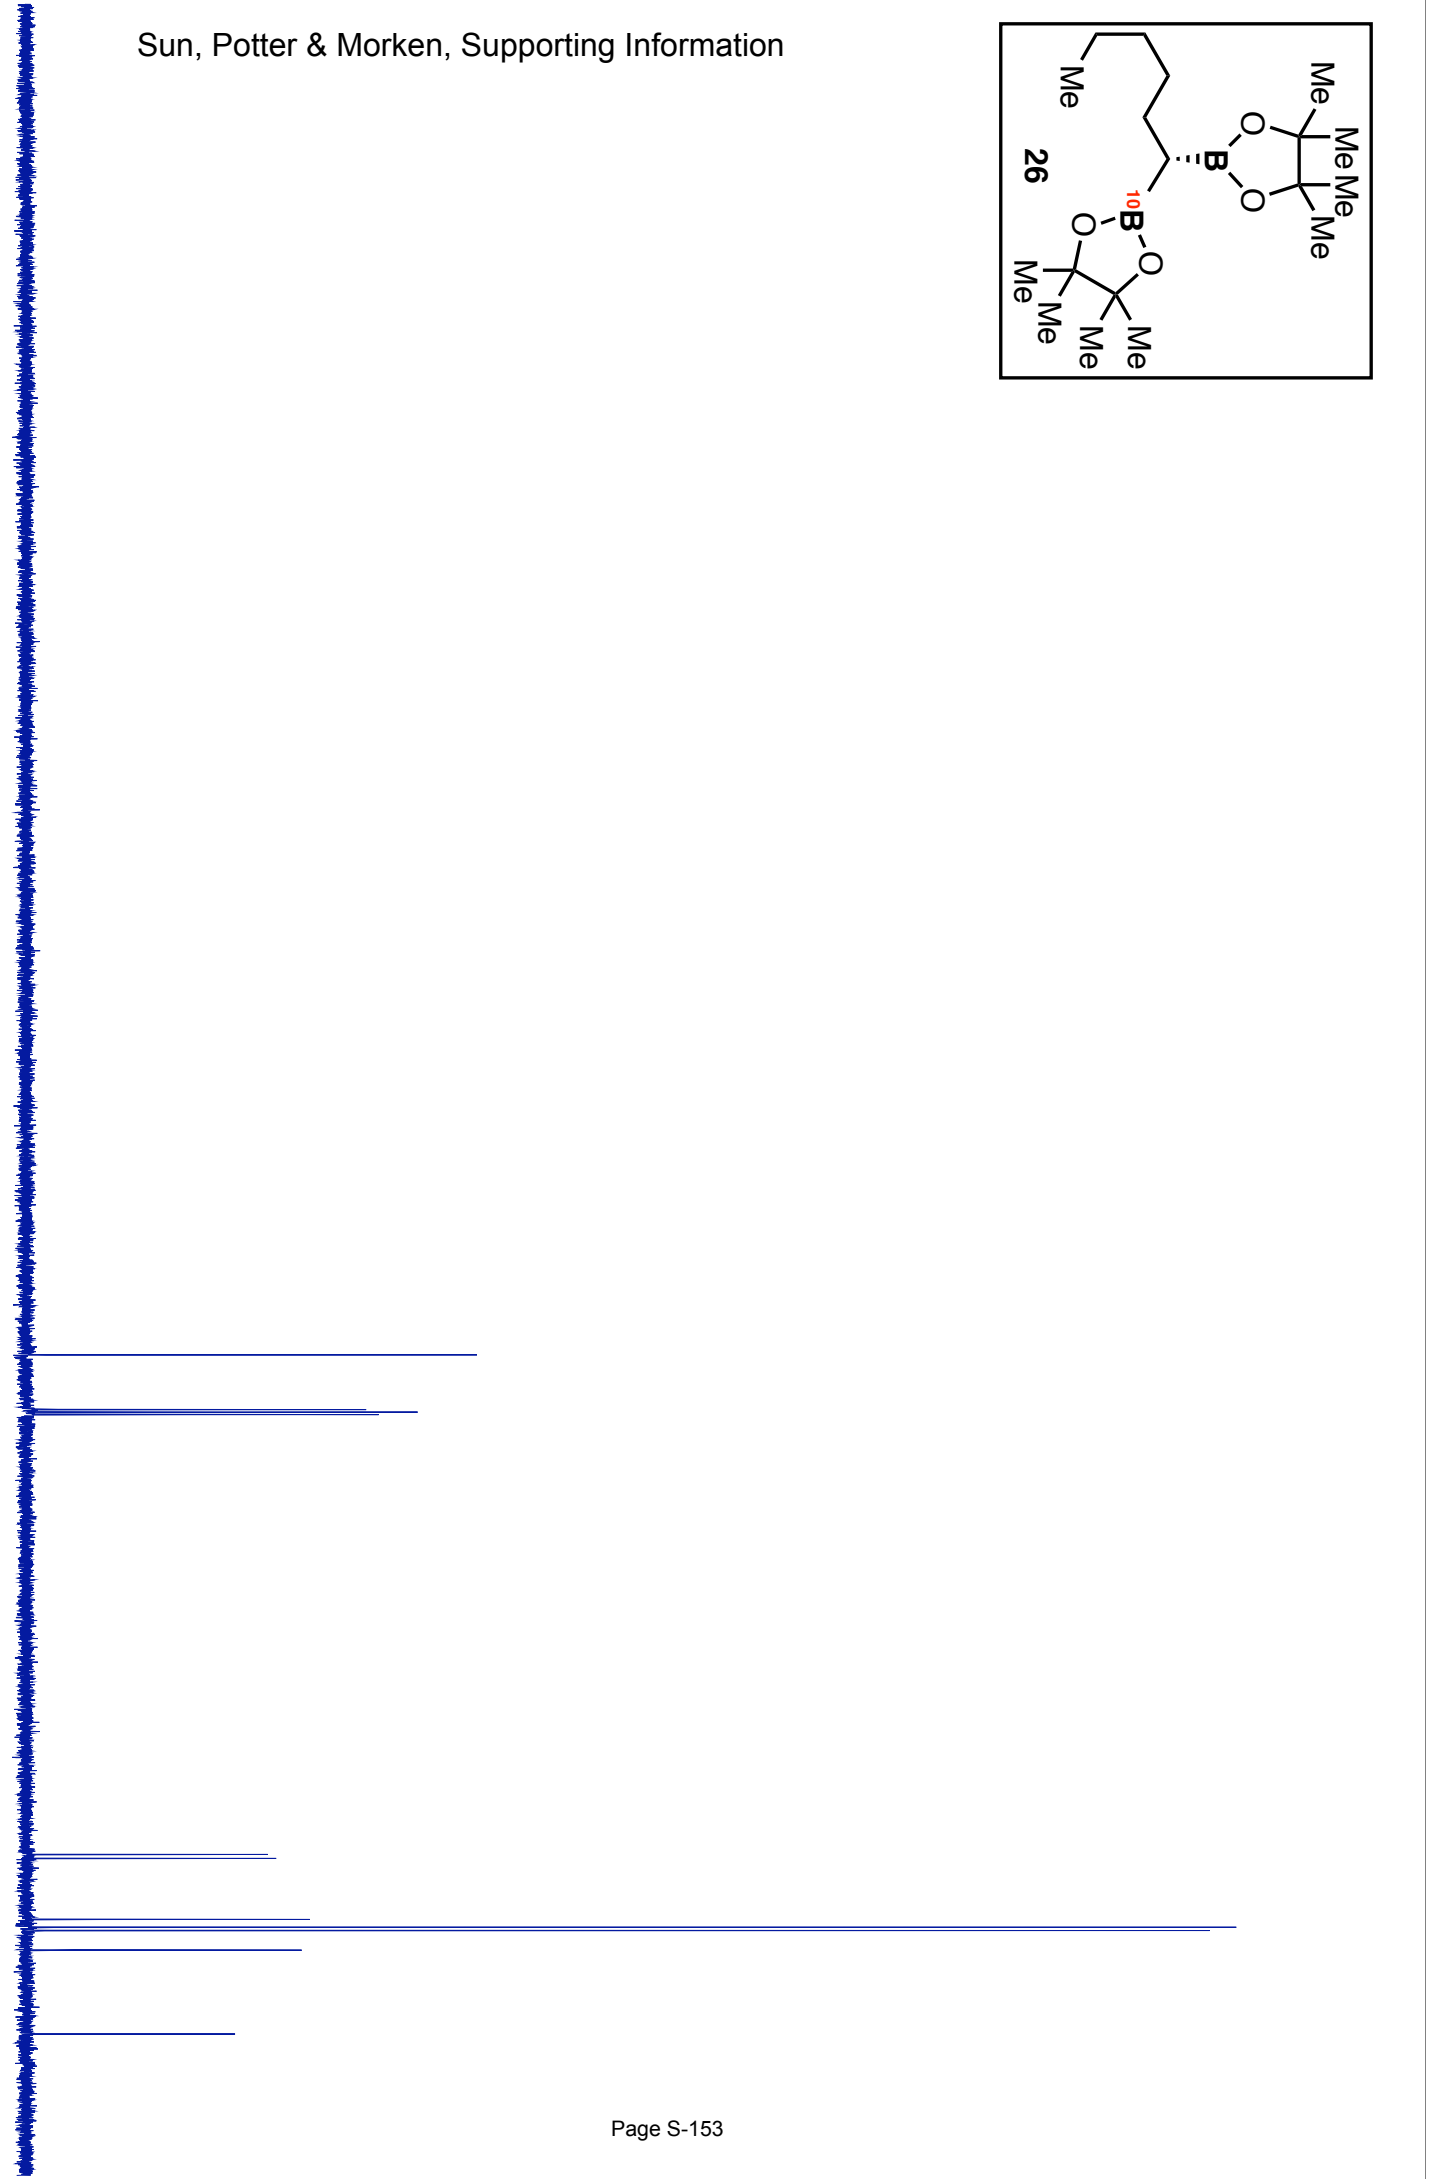

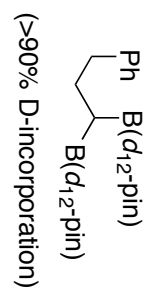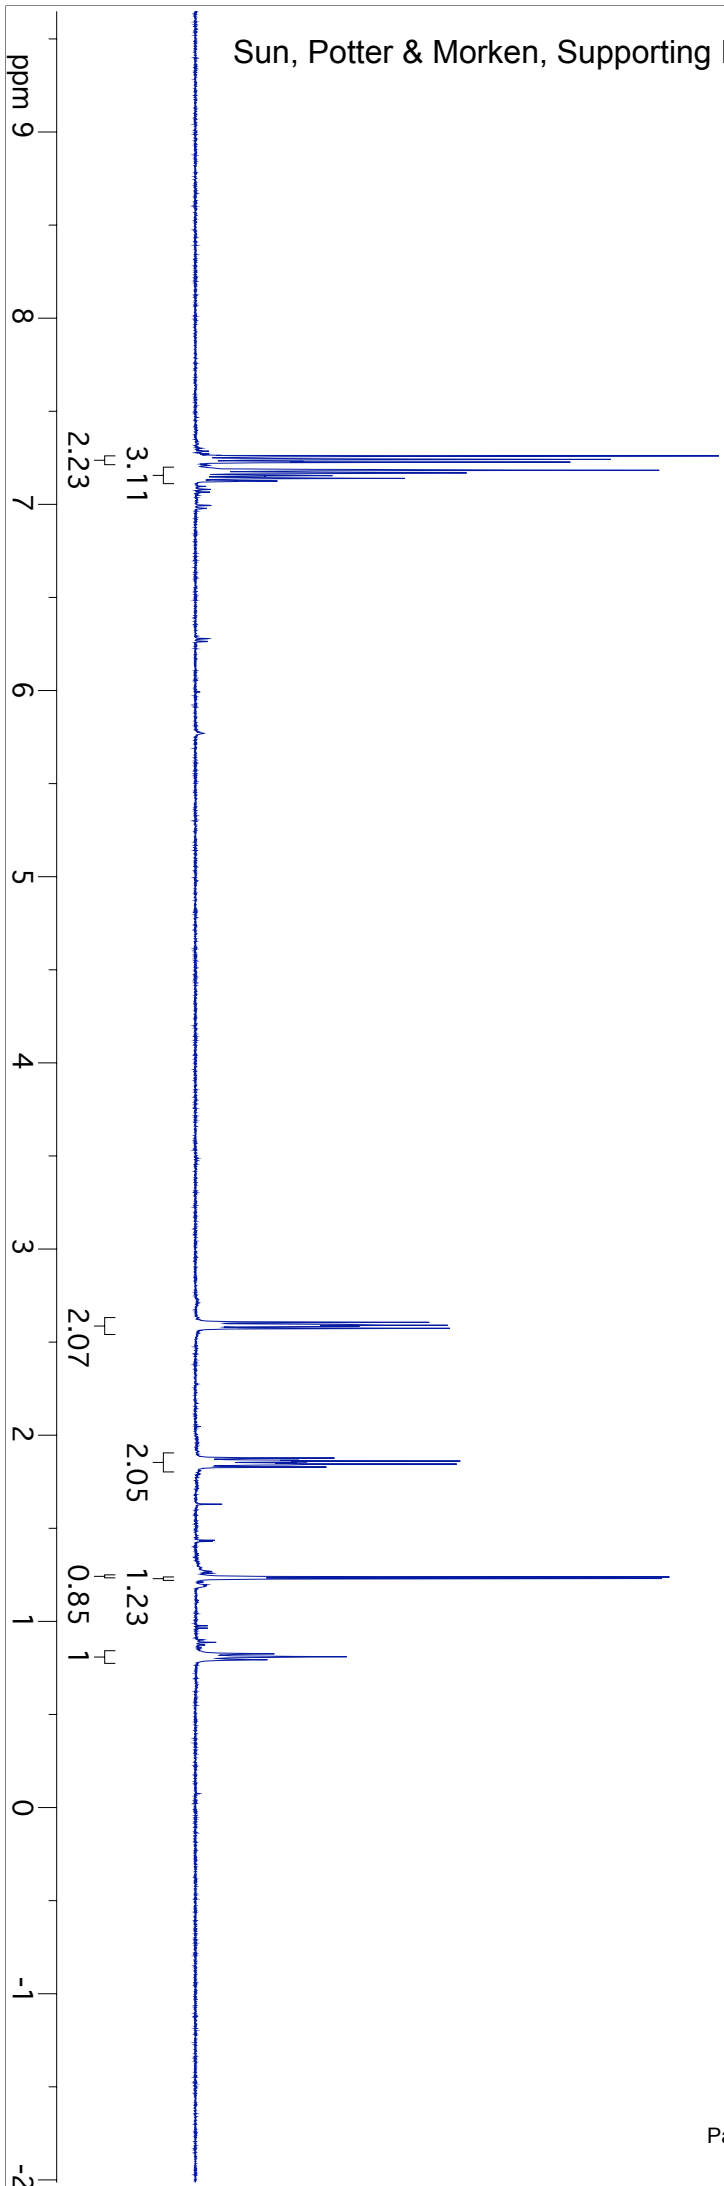

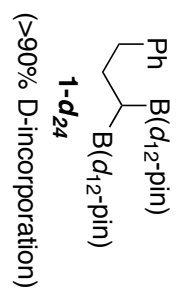

ppm 220  
200  
180  
160  
140  
120  
100  
80  
60  
40  
20  
0

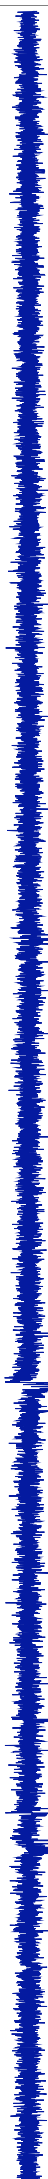

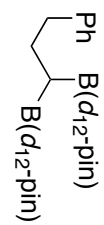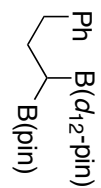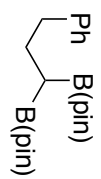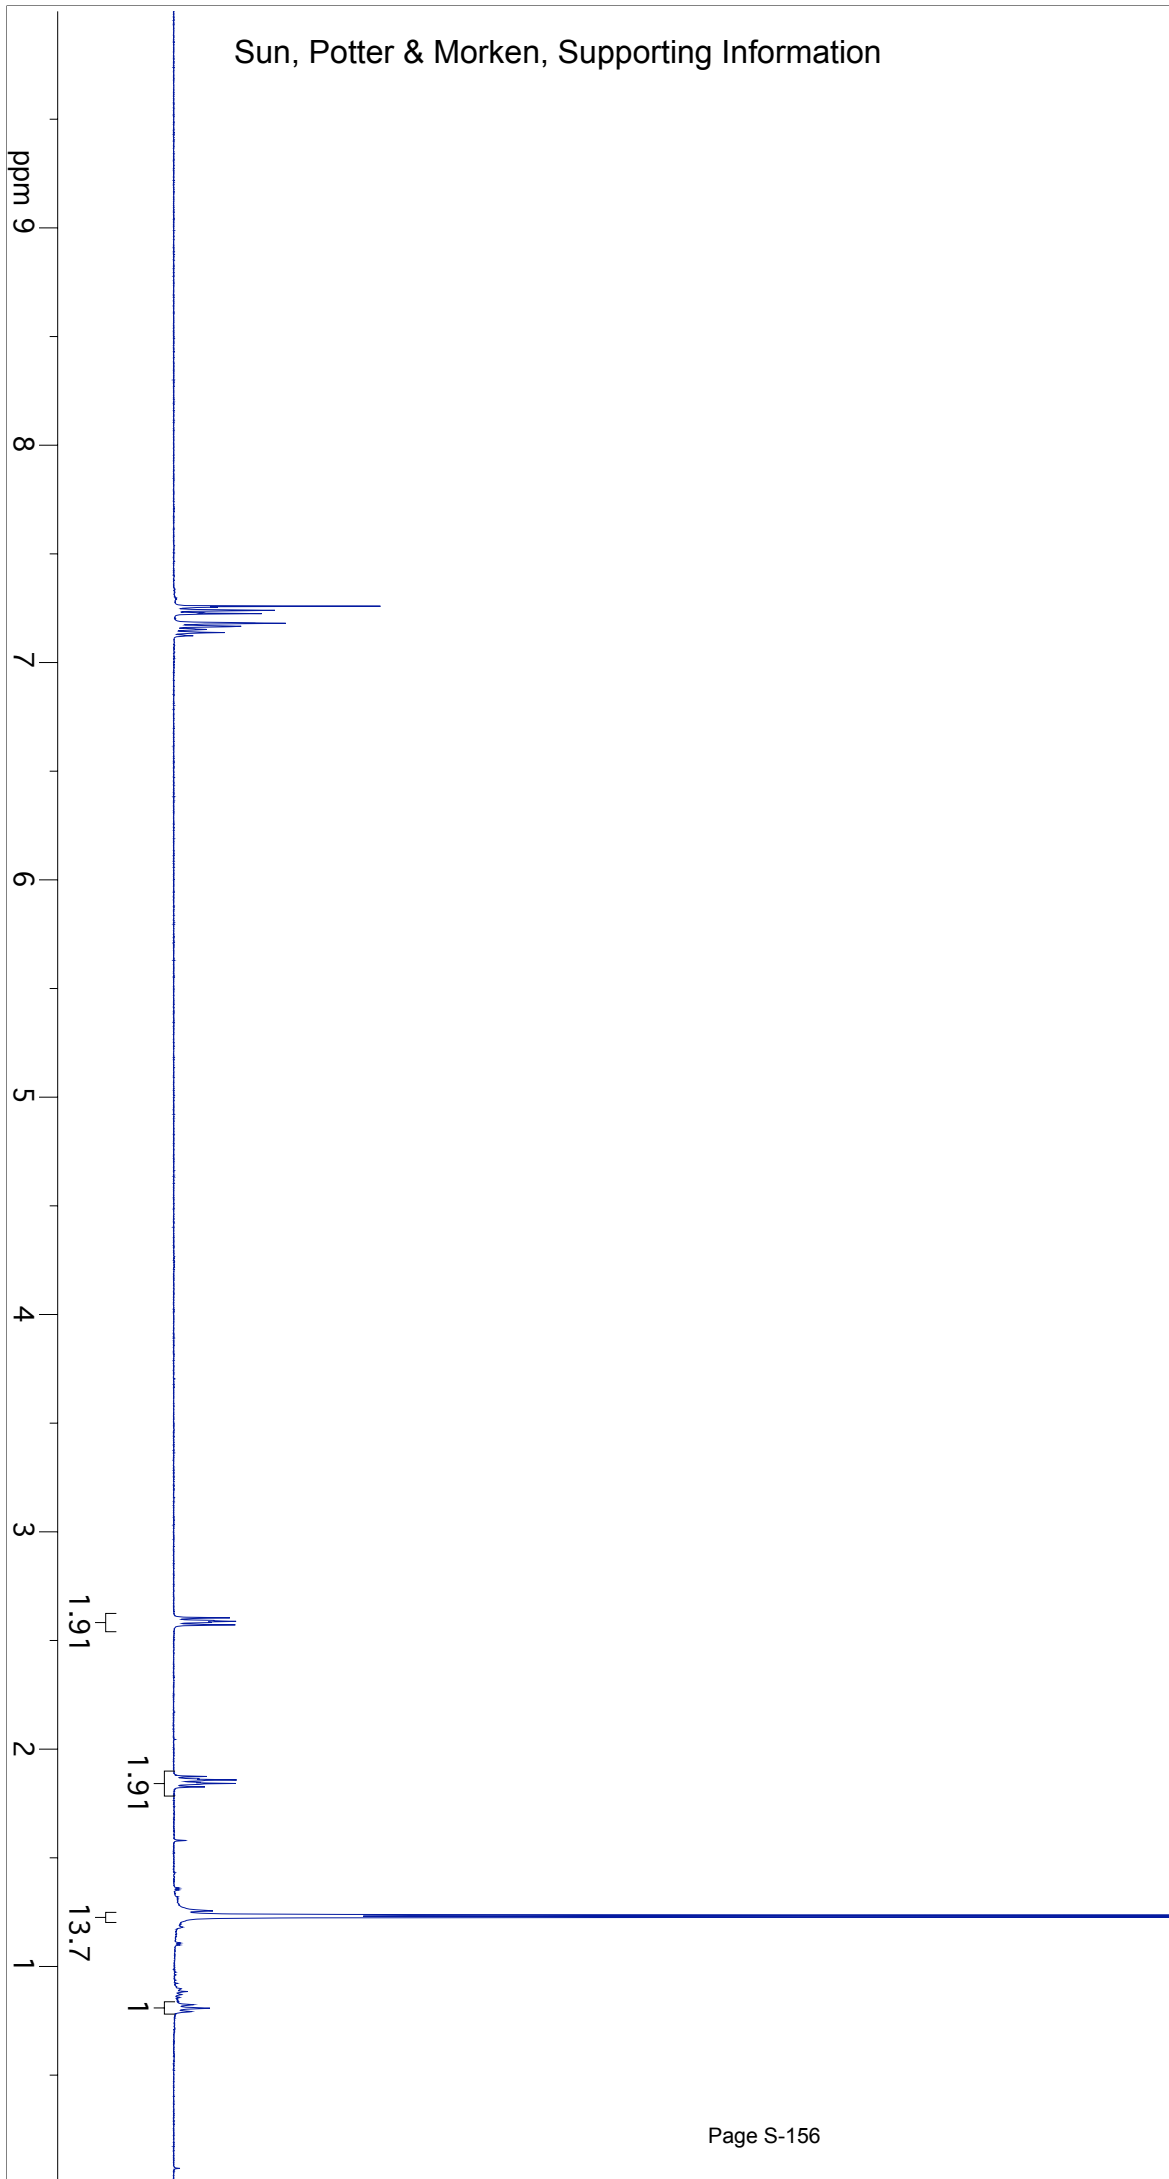

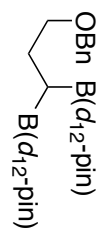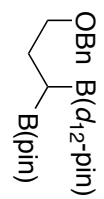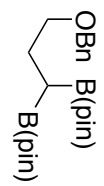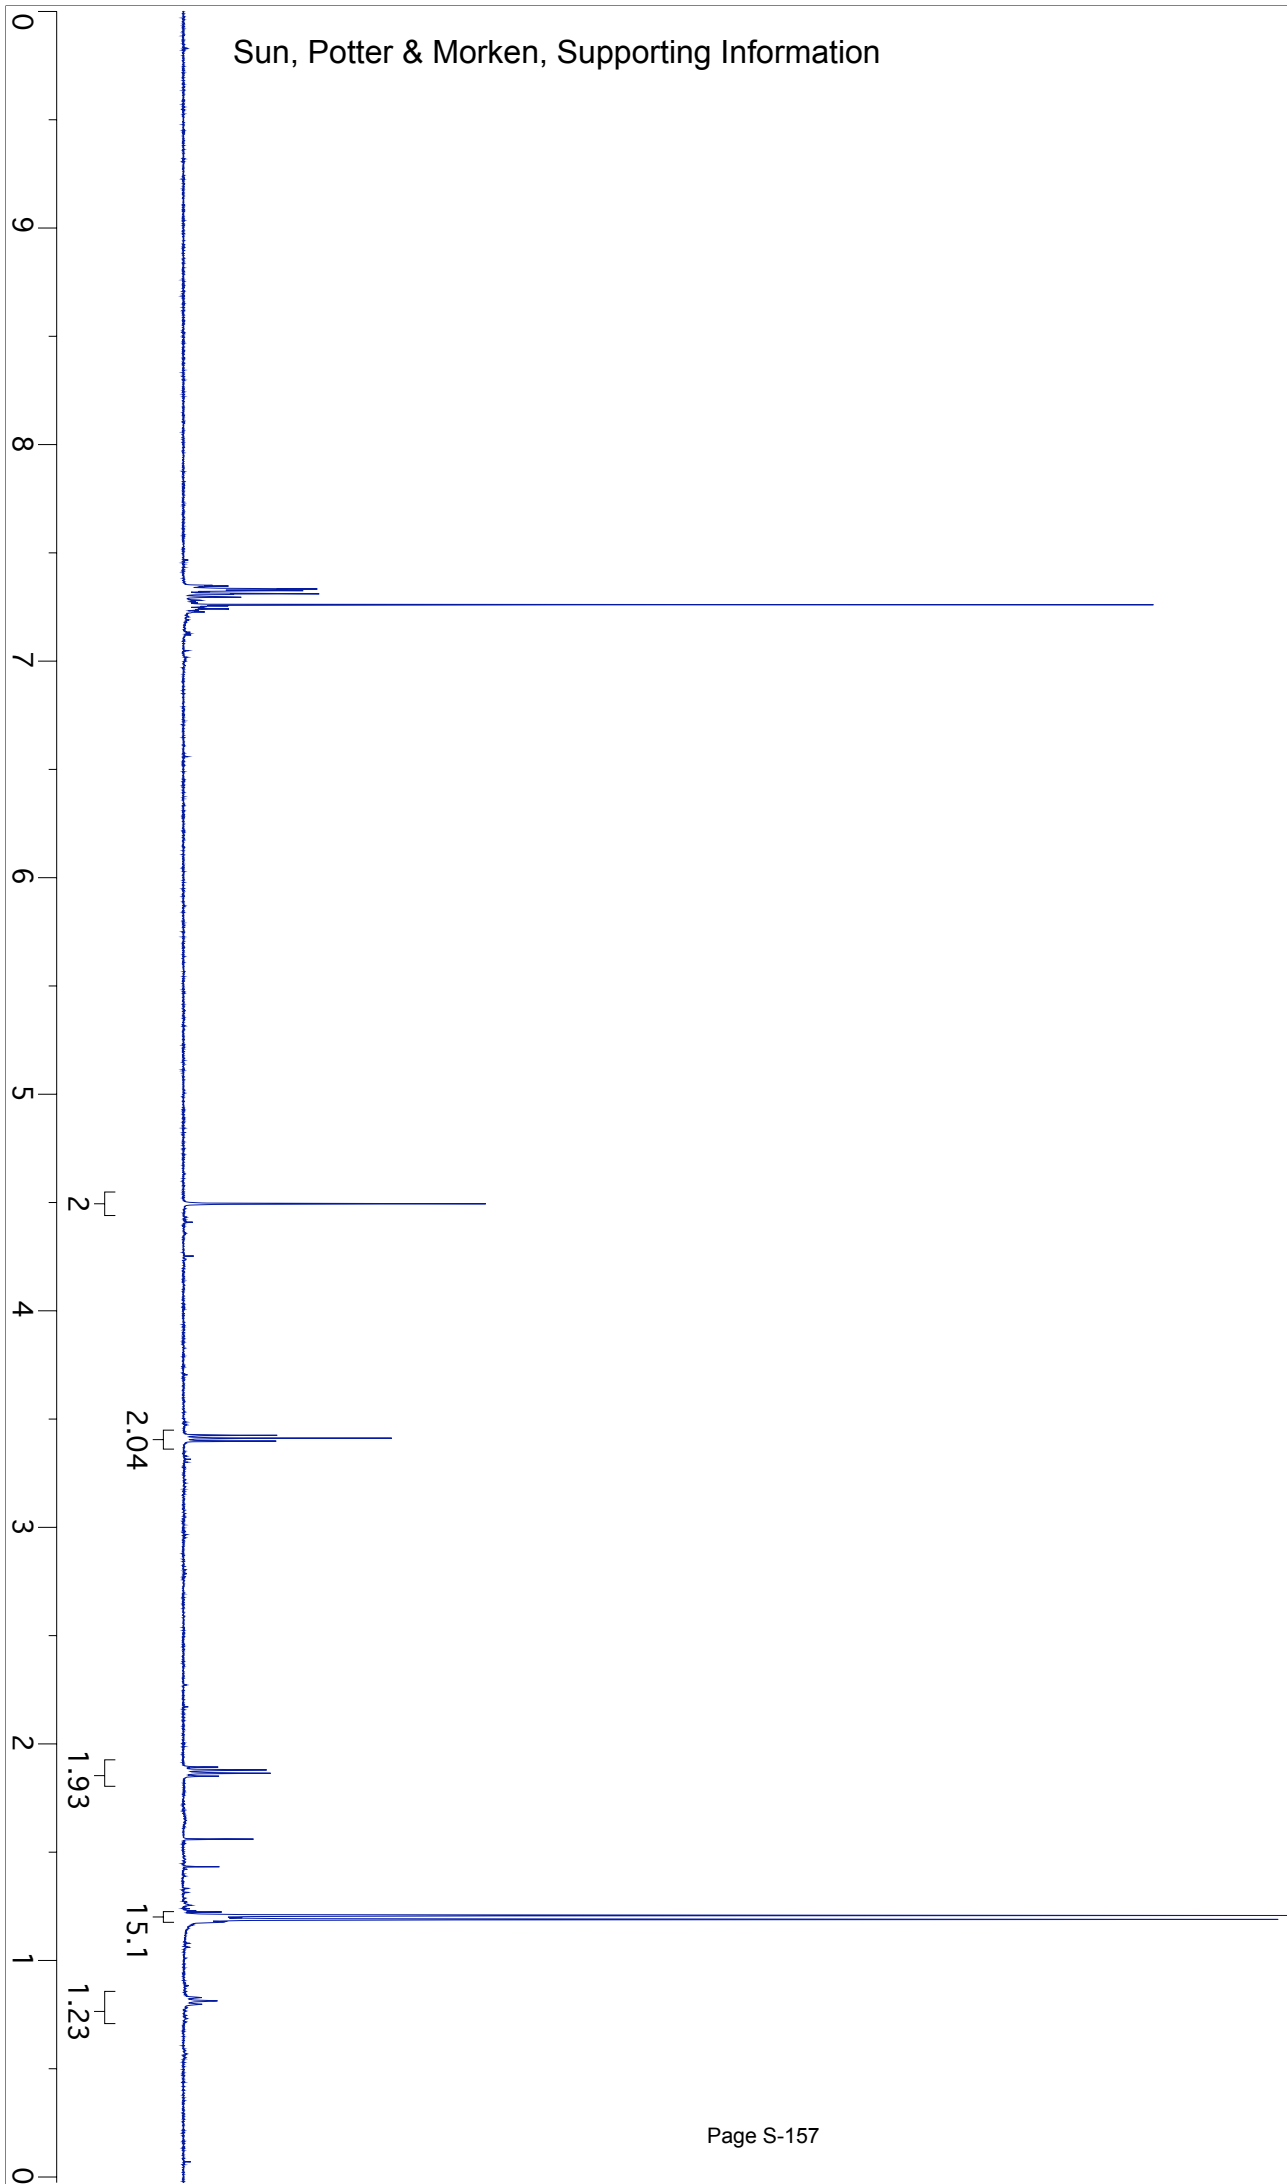

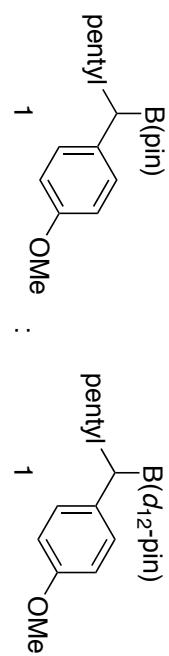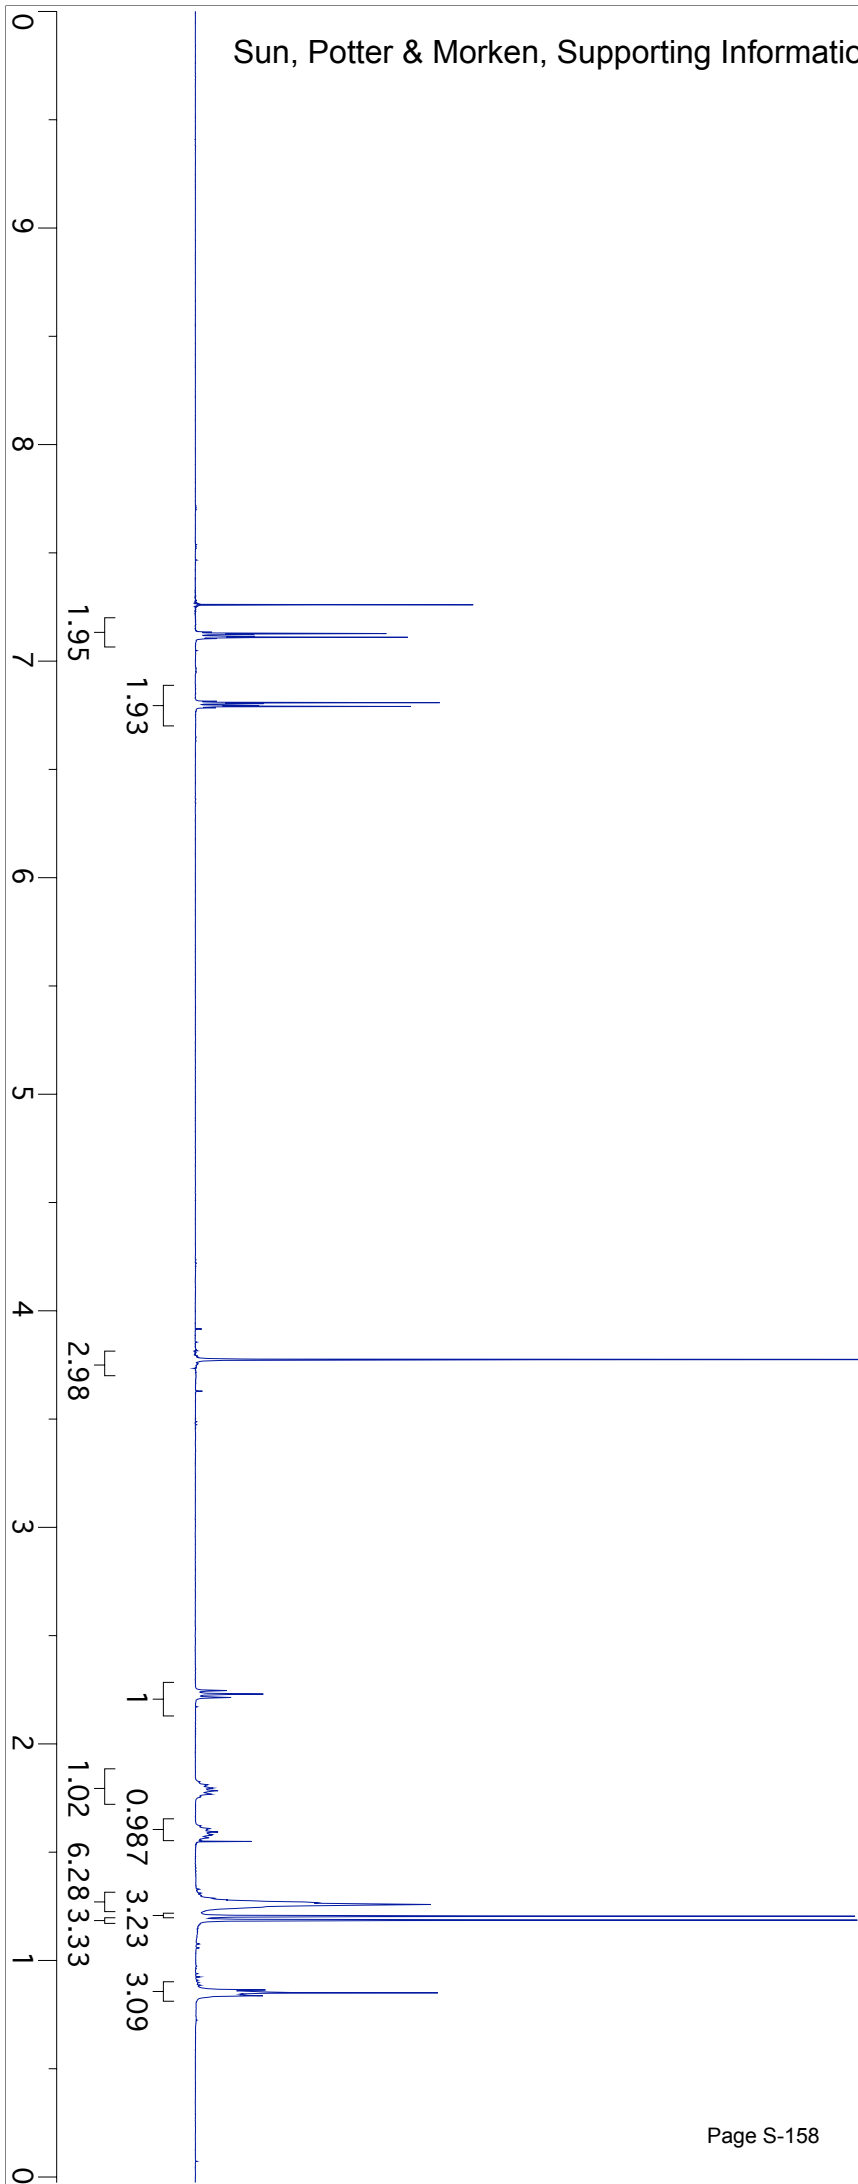

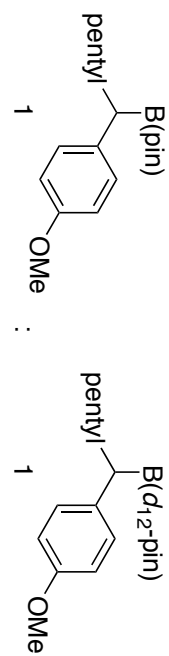

ppm 200  
180  
160  
140  
120  
100  
80  
60  
40  
20  
0

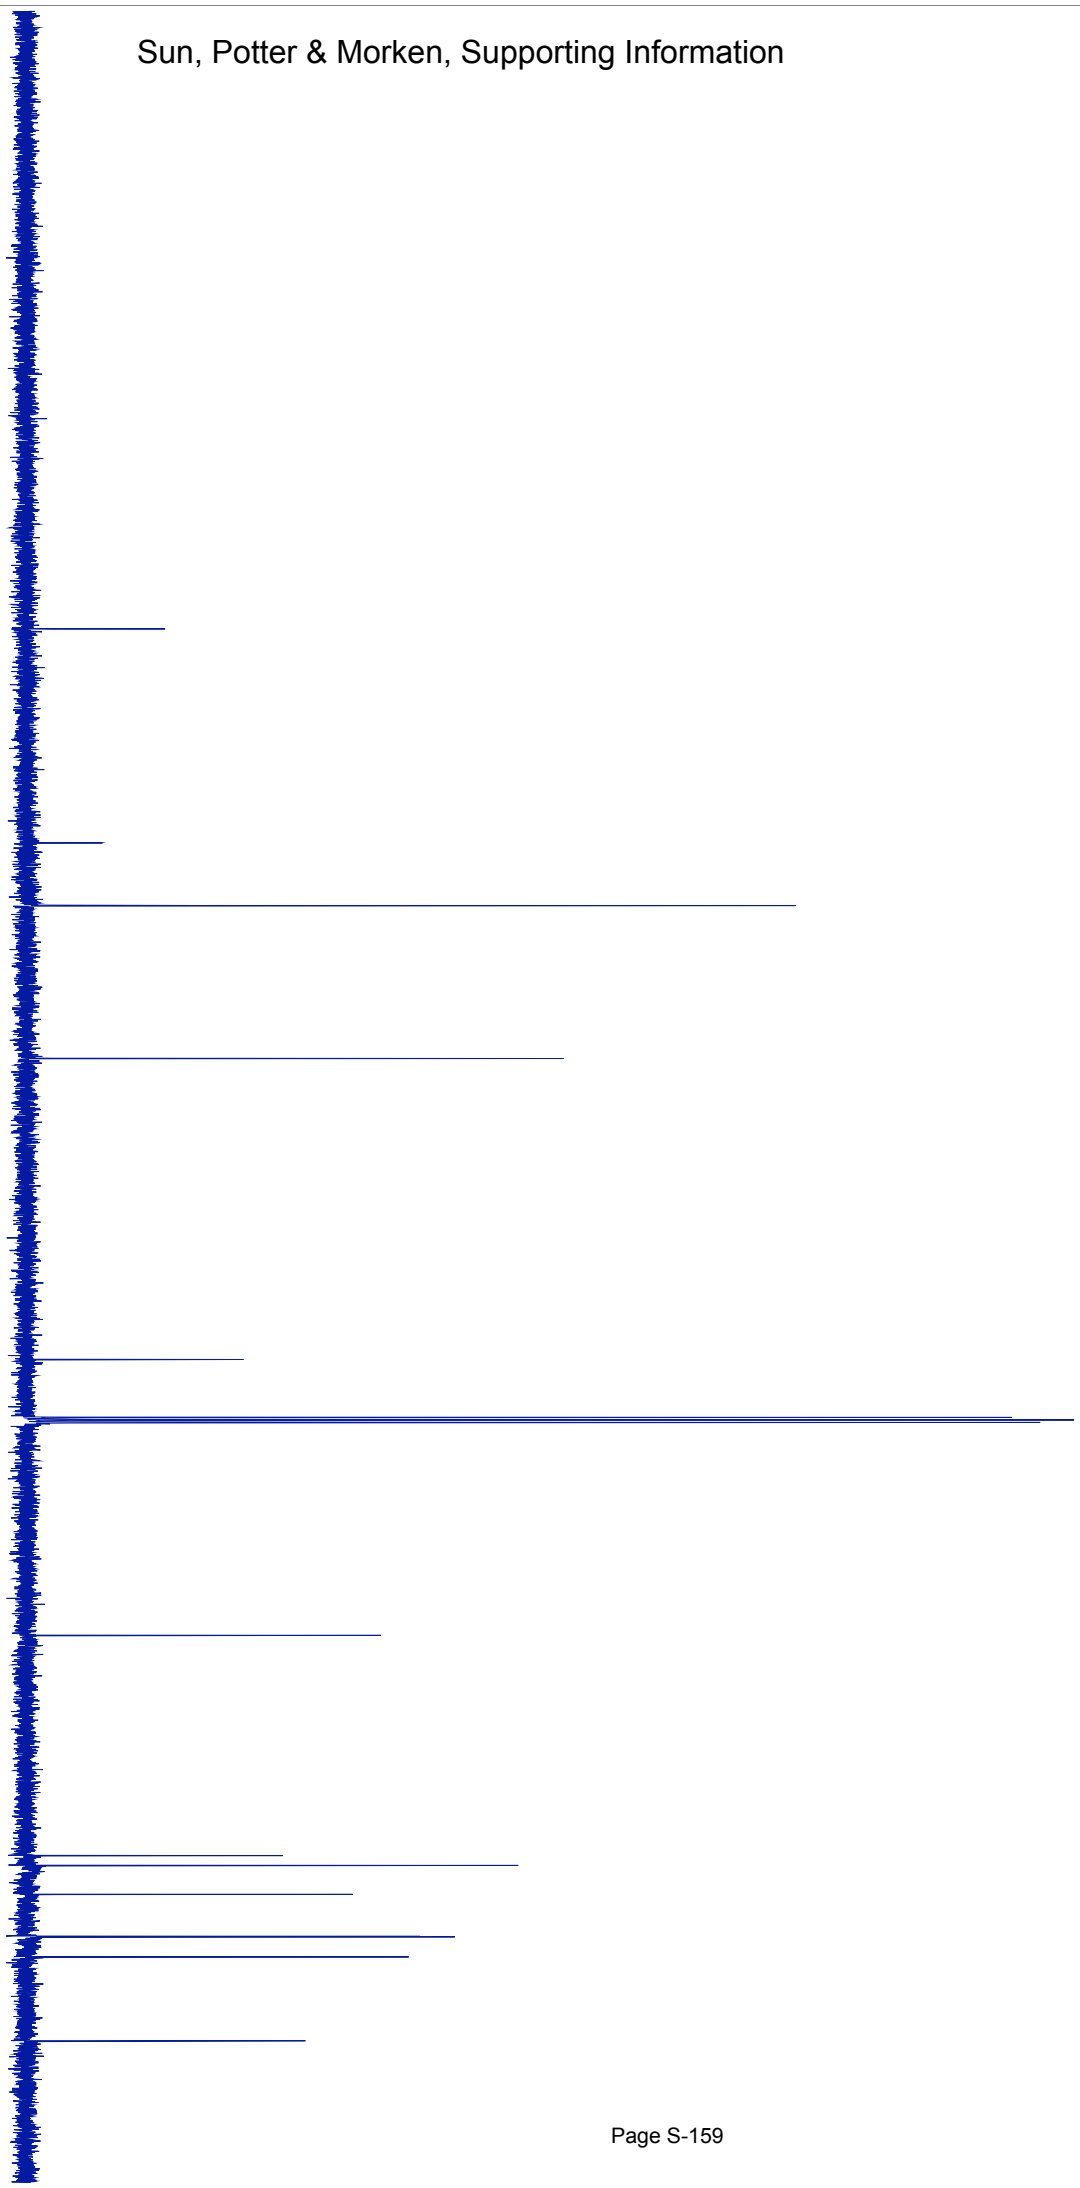

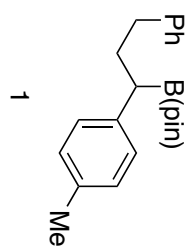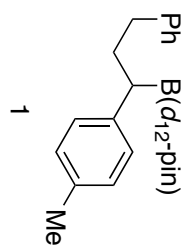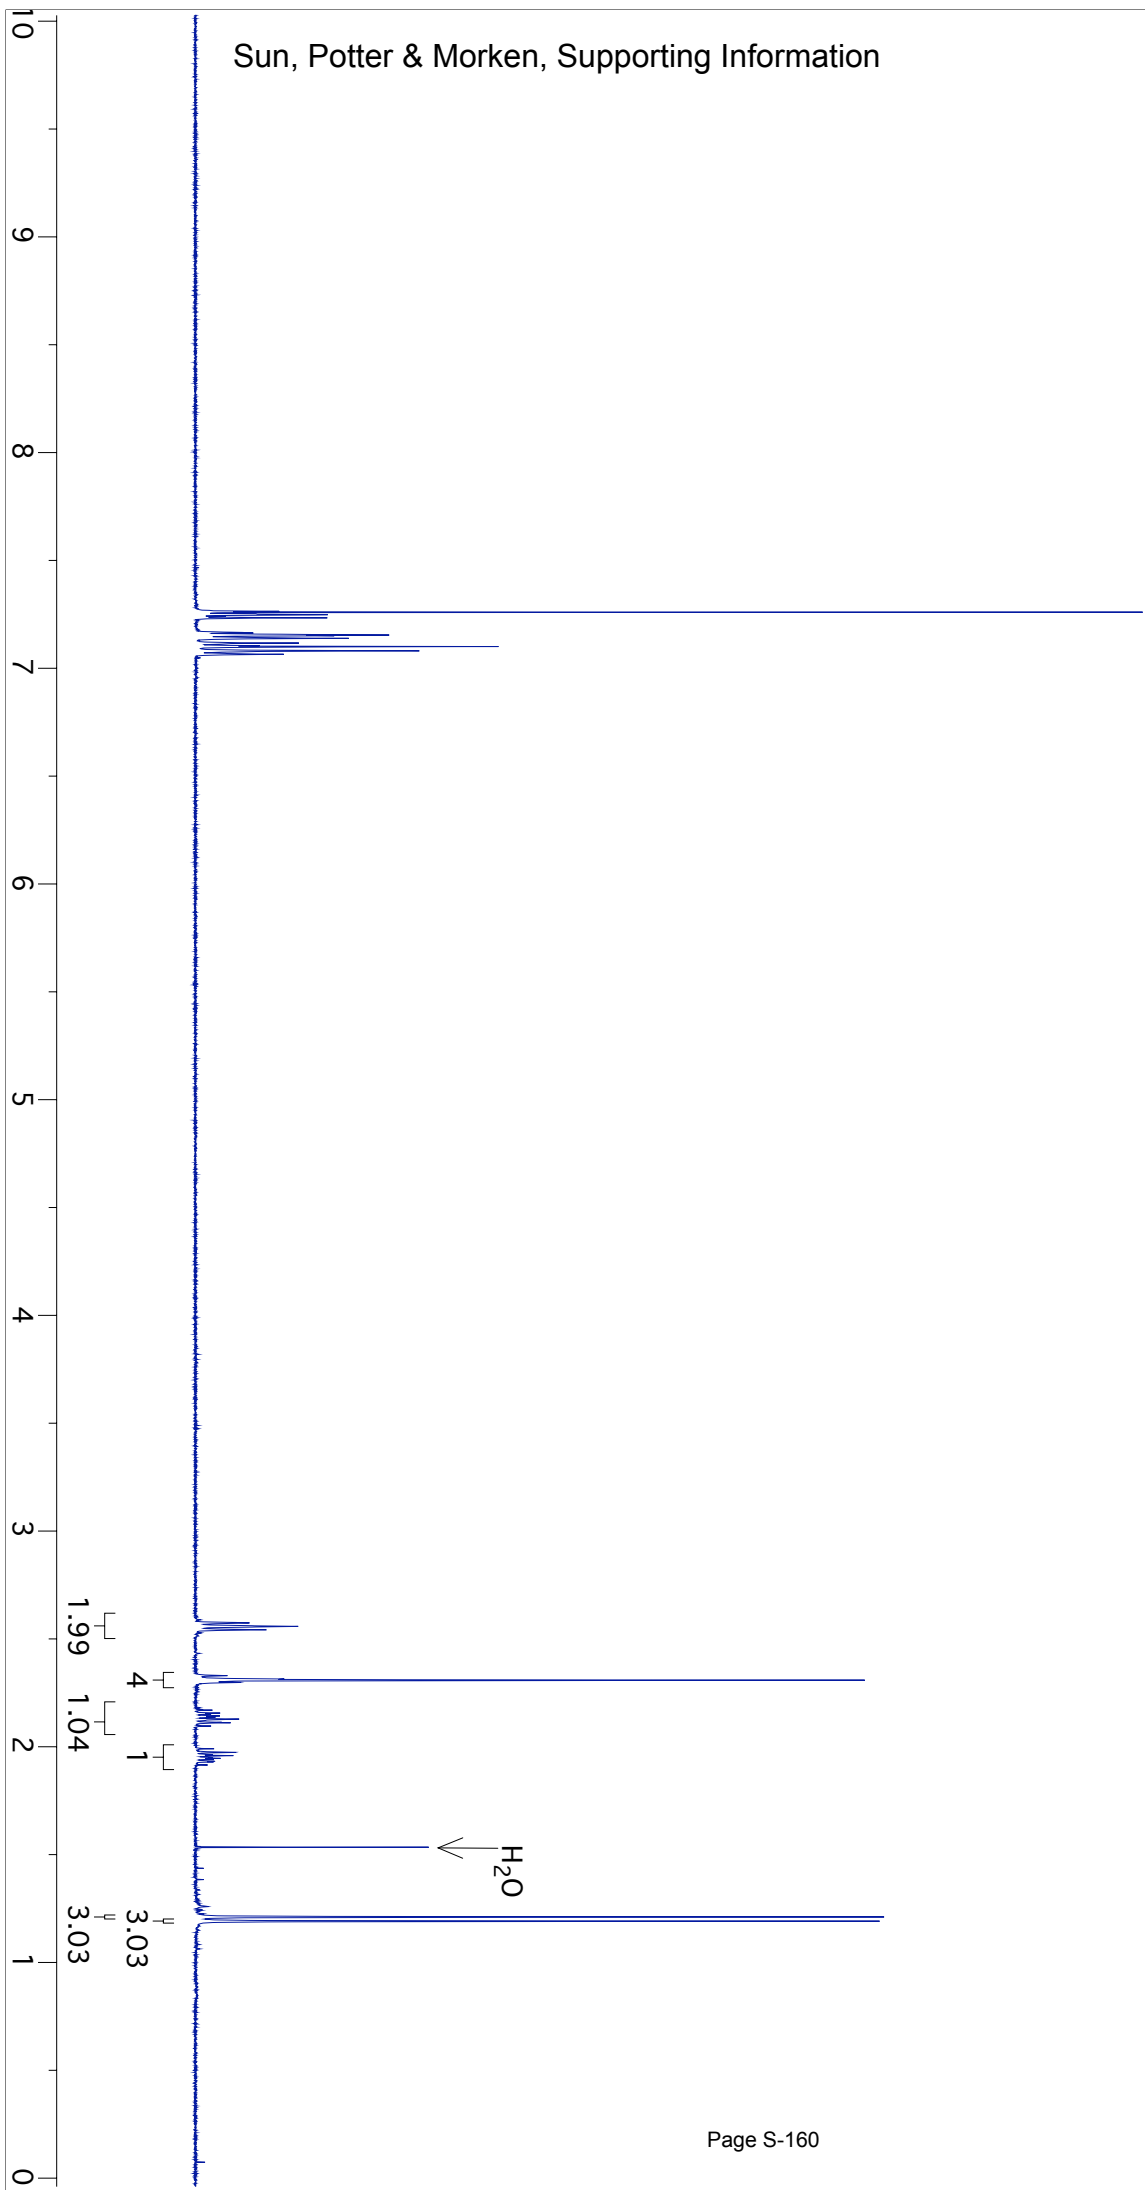



Sun, Potter & Morken, Supporting Information

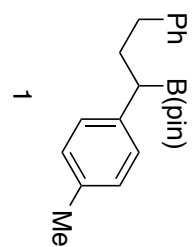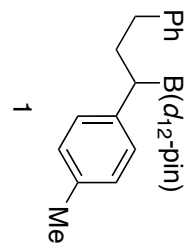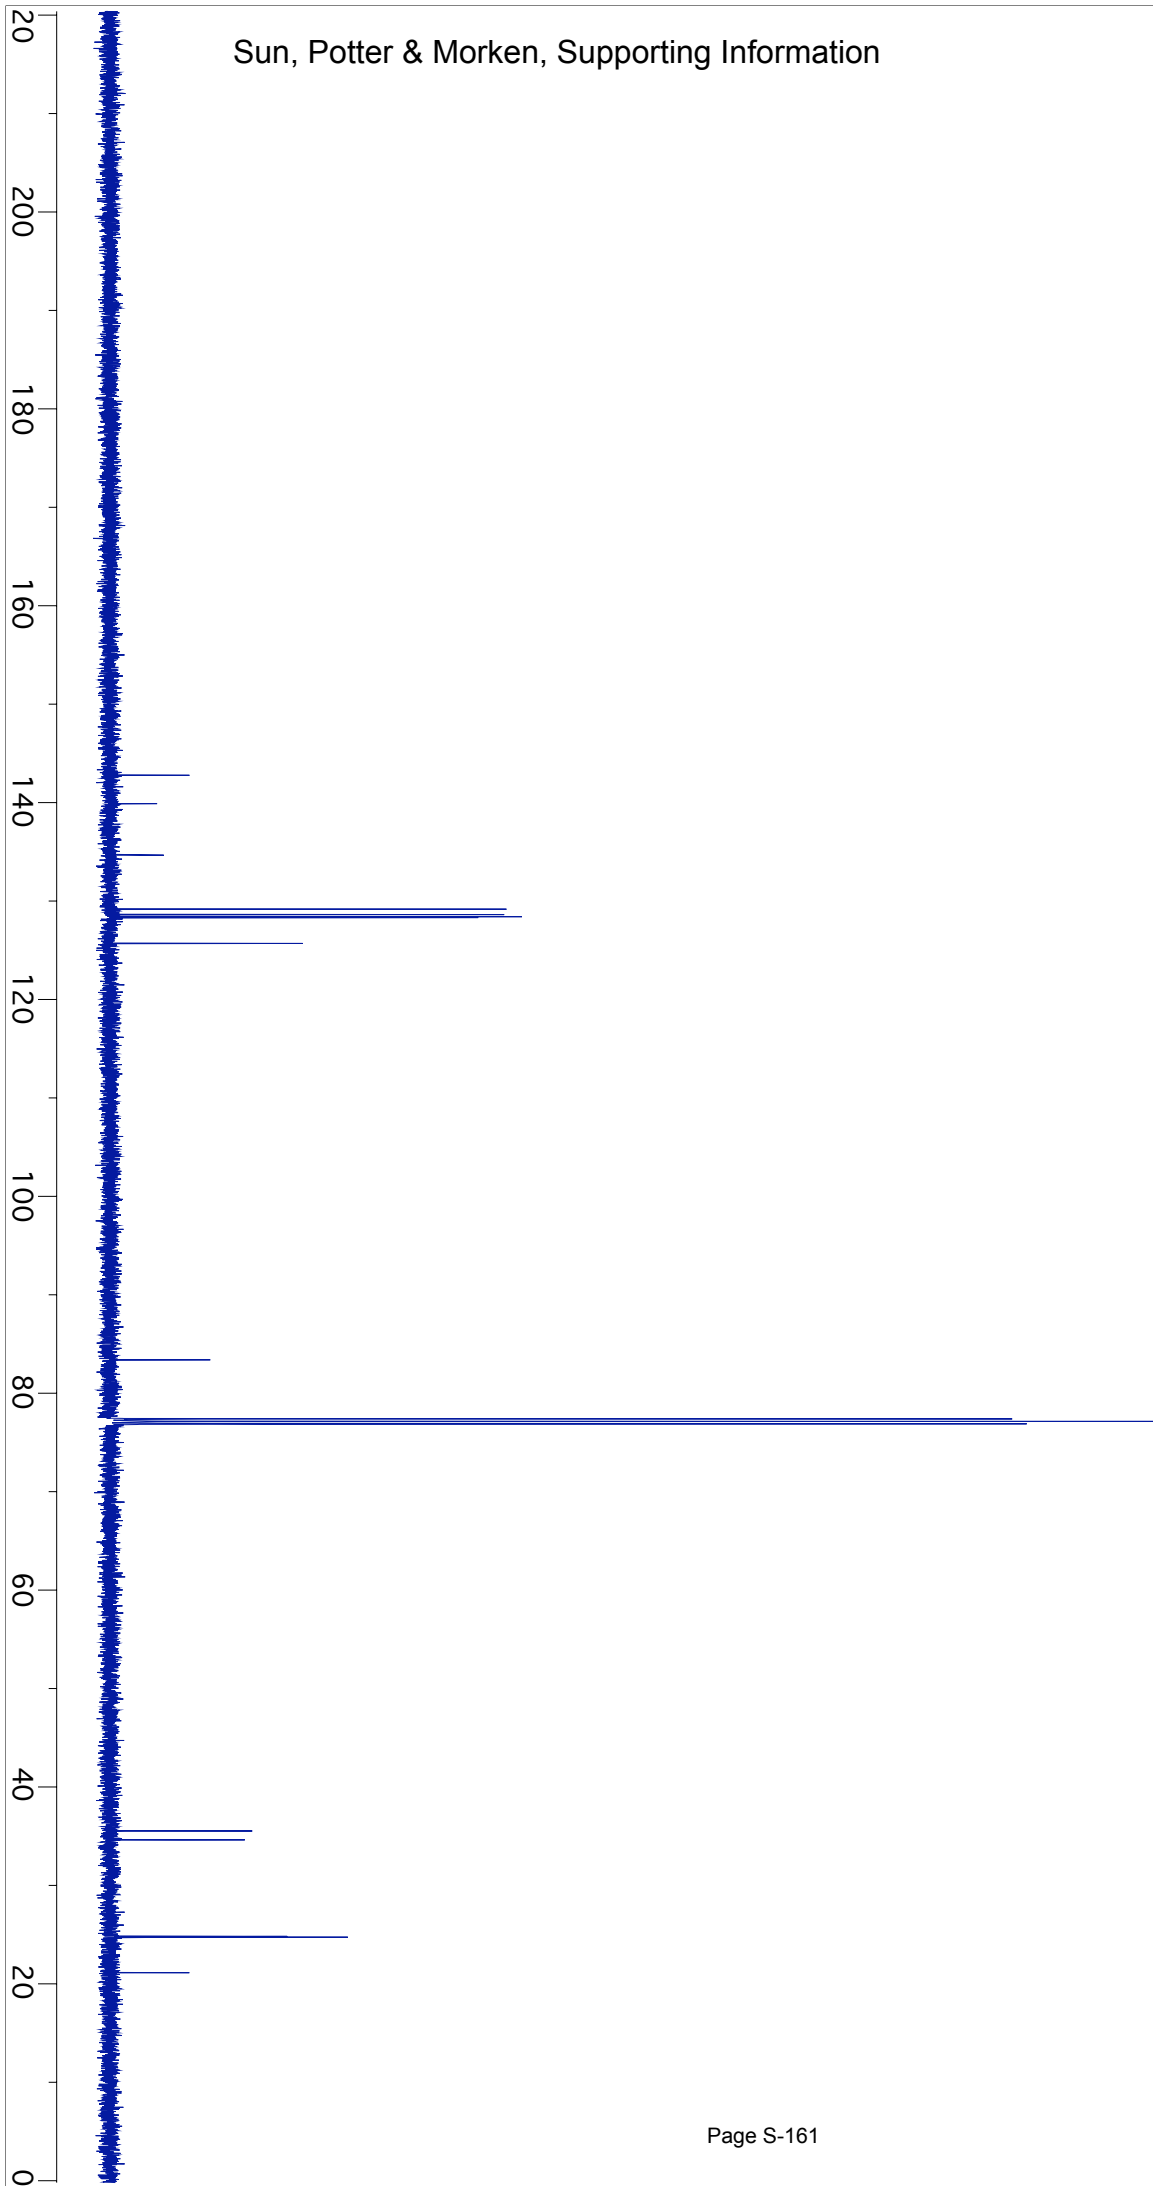

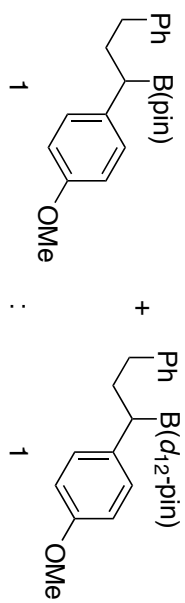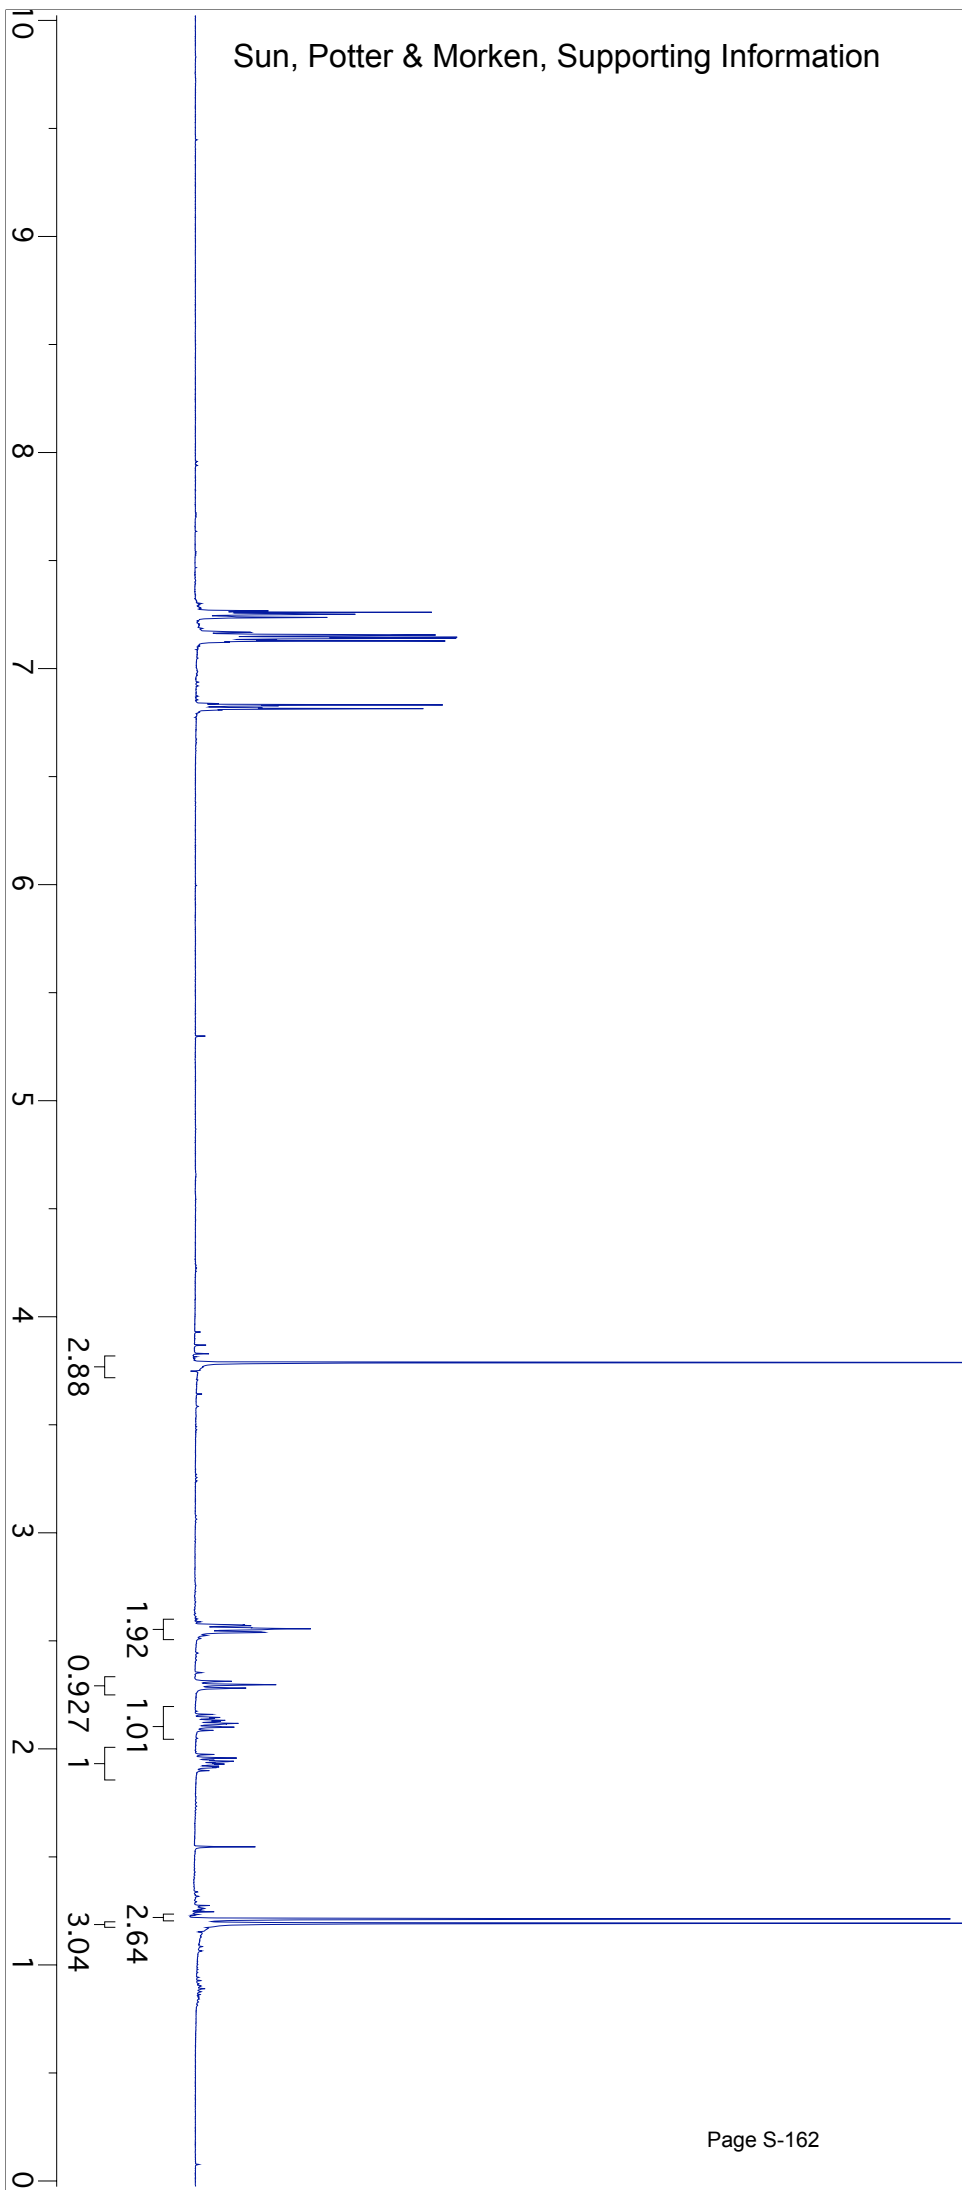

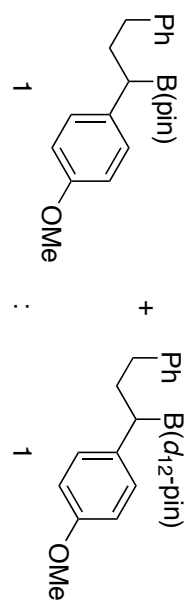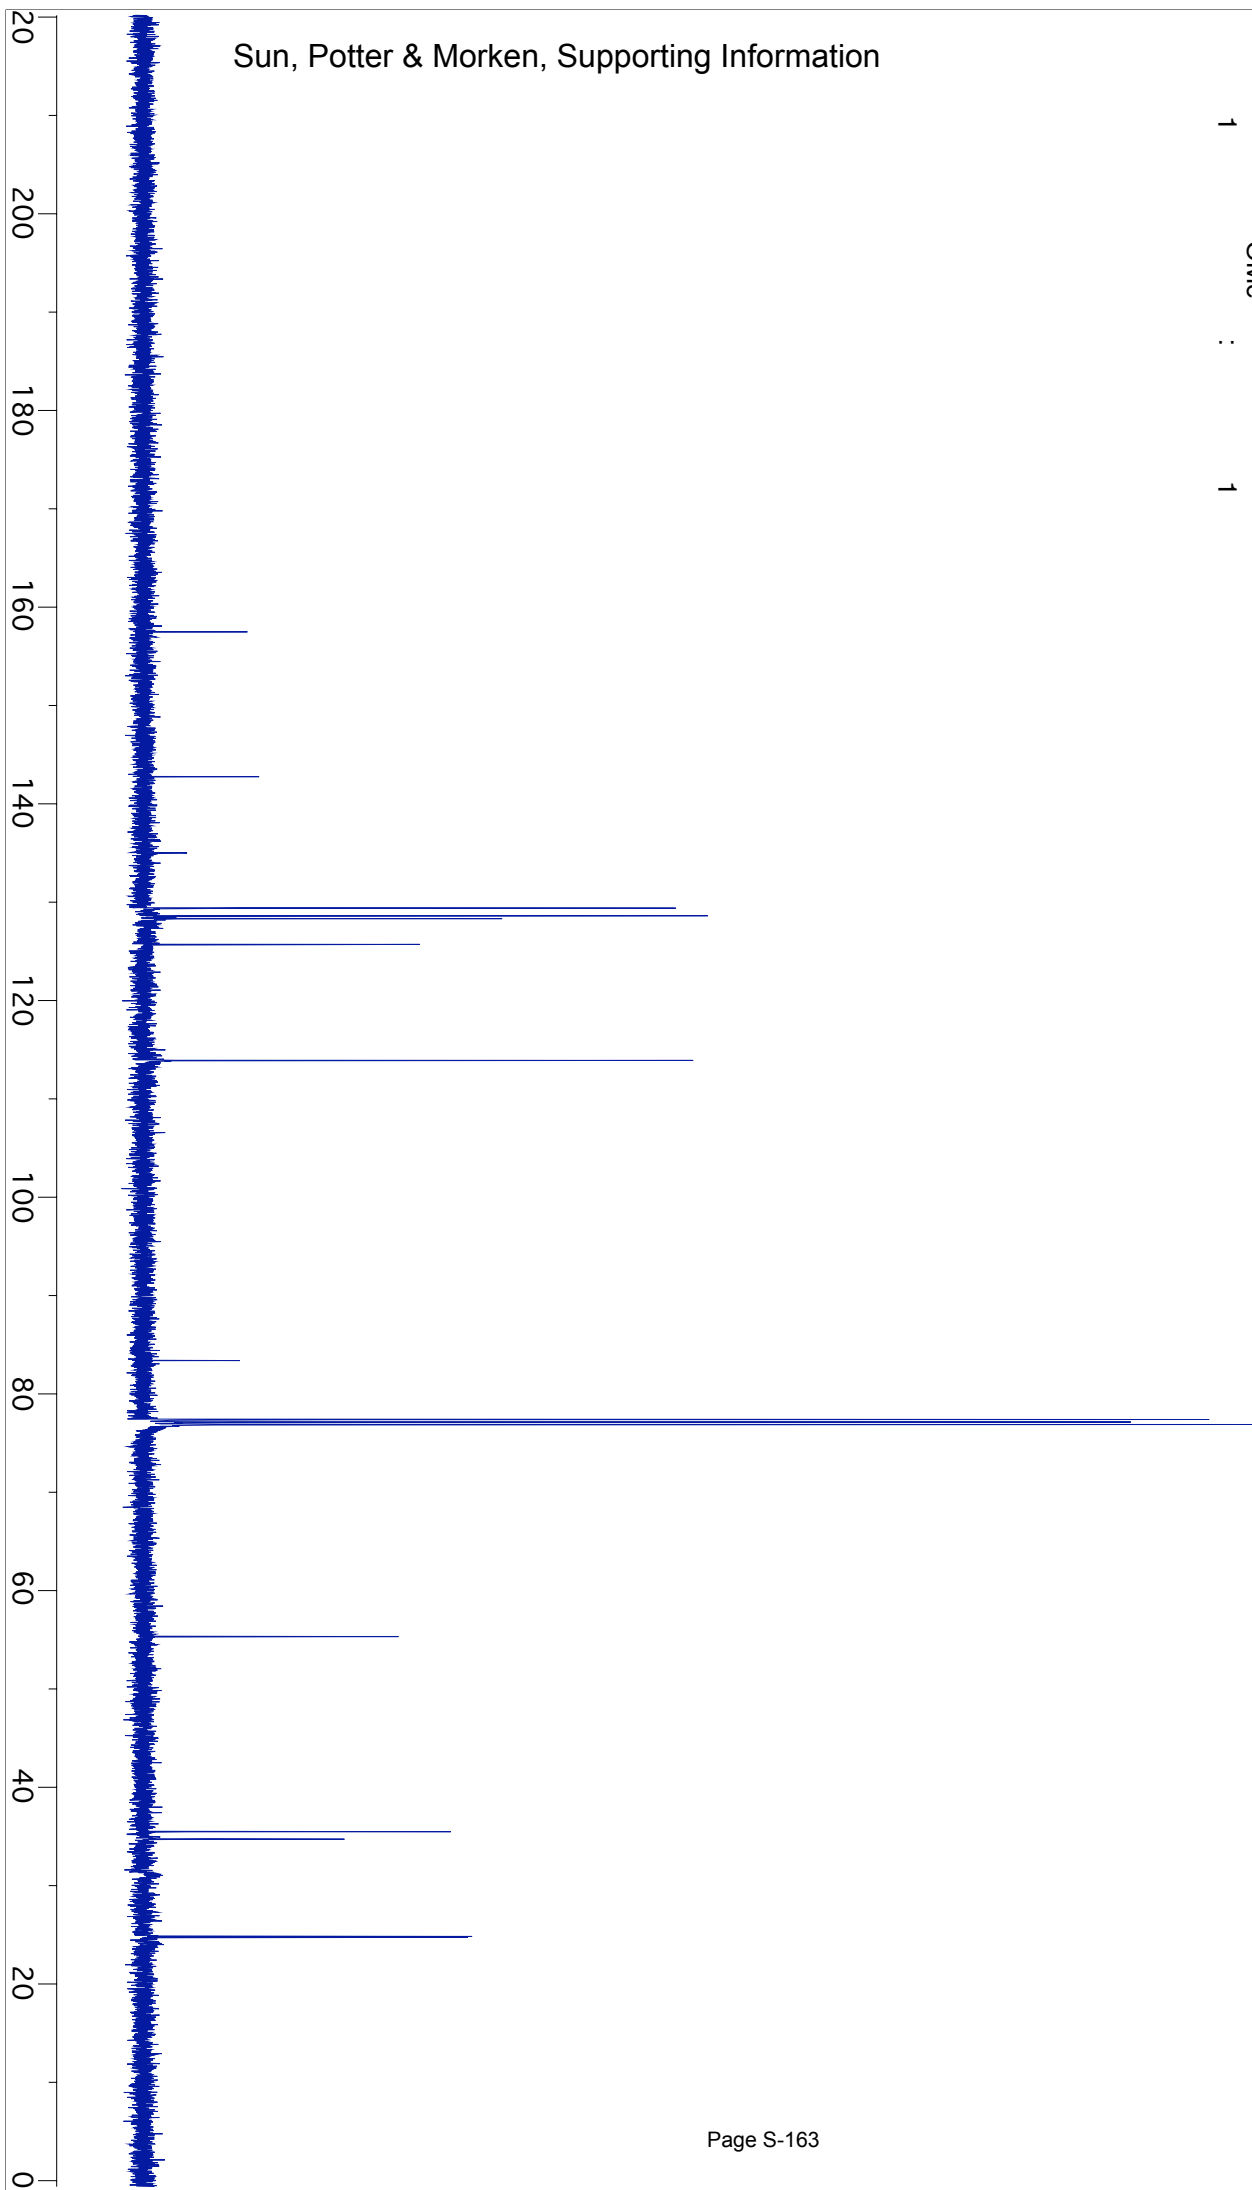

Supplement: ja500029w_si_001.pdf [file ja500029w_si_001.pdf]
